# Supplementary material for: Comparative Transcriptional Profiling Provides Insights into the Evolution and Development of the Zygomorphic Flower of Vicia sativa (Papilionoideae)
Source: PLoS One. 2013 Feb 21;8(2):e57338. doi: 10.1371/journal.pone.0057338 (PMC3578871; doi:10.1371/journal.pone.0057338)
Supplement: Table S4 — Enriched and downregulated unigenes in vetch floral organs and their functional categories. (XLS) [file pone.0057338.s011.xls]

## Sheet: Table S4 legend
	Table S4. Enriched and downregulated unigenes in vetch floral organs and their functional categories.
	Table S4A. The distribution of functional annotations of organ-enriched unigenes in vetch;
	Table S4B. The enriched unigenes and their functional categories in vetch;
	Table S4C. The distribution of functional annotations of organ-downregulated unigenes in vetch;
	Table S4D. The downregulated unigenes and their functional categories in vetch.

## Sheet: Table S4A
Table S4A. The distribution of functional annotations of organ-enriched unigenes in vetch (using cutoffs of a Ratio >2.0 and Z-score >3.75). The numbers (Table A) and percentages (Table B) of the GO term distributions of the enriched unigenes with putative functions in each group in vetch.
Table A
Enrichment	Sepals	Petals	Stamens	Carpels	Leaves	Roots
Biological regulation	17	66	82	128	111	138
Cell wall organization or biogenesis	12	0	25	0	0	0
Cellular component biogenesis	7	0	22	29	11	0
Cellular component organization	12	32	79	73	36	52
Cellular process	116	386	398	592	516	674
Death	0	0	0	0	12	28
Developmental process	19	77	96	154	68	139
Localization	34	80	131	94	97	121
Metabolic process	139	494	364	688	596	765
Multicellular organismal process	18	60	59	105	59	108
Multi-organism process	0	21	26	21	12	31
Reproduction	6	17	48	47	21	43
Response to stimulus	47	168	157	226	255	383
Signaling	9	26	33	42	22	37
Total	436	1427	1520	2199	1816	2519
Table B
Enrichment	Sepals(%)	Petals(%)	Stamens(%)	Carpels(%)	Leaves(%)	Roots(%)
Biological regulation	3.9	4.63	5.39	5.82	6.11	5.48
Cell wall organization or biogenesis	2.75	0	1.64	0	0	0
Cellular component biogenesis	1.61	0	1.45	1.32	0.61	0
Cellular component organization	2.75	2.24	5.2	3.32	1.98	2.06
Cellular process	26.61	27.05	26.18	26.92	28.41	26.76
Death	0	0	0	0	0.66	1.11
Developmental process	4.36	5.4	6.32	7	3.74	5.52
Localization	7.8	5.61	8.62	4.27	5.34	4.8
Metabolic process	31.88	34.62	23.95	31.29	32.82	30.37
Multicellular organismal process	4.13	4.2	3.88	4.77	3.25	4.29
Multi-organism process	0	1.47	1.71	0.95	0.66	1.23
Reproduction	1.38	1.19	3.16	2.14	1.16	1.71
Response to stimulus	10.78	11.77	10.33	10.28	14.04	15.2
Signaling	2.06	1.82	2.17	1.91	1.21	1.47
Total	100	100	100	100	100	100

## Sheet: Table S4B
Table S4B. The enriched unigenes and their functional categories in vetch. This table displays the corresponding detailed information for the Table S4A, including the unigenes showing specific expression in the target organs and undetectable expression in the control organs (using cutoffs of a Ratio >2.0 and Z-score >3.75).
Organs	GeneID	Sepals	Dorsal petals	Lateral petals	Ventral petals	Stamens	Carpels	Leaves	Roots	Ratio	Zi-score	Gene Length	Raw reads(13004089)	RPKM	Nr-ID	Nr-Score	Nr-Evalue	Nr-annotation	Swissprot-ID	Swissprot-Score	Swissprot-Evalue	Swissprot-annotation	COG-Protein-or-Domain	COG-Score	COG-Evalue	COG-ID	COG-Function-Description	KO_id	KEGG-Evalue	KEGG-Score	KEGG-Gene	ko_definition	GO-BiologicalProcess	GO-MolecularFunction	GO-CellularComponent
Sepals	Unigene10232	41.46	14.81	7.09	11.63	6.66	4.02	10.03	5.79	2.8	8.75	503	84	12.842	gi|228485371|gb|ACQ44234.1|	194	3e-62	EDS5 [Glycine max]	sp|Q945F0|EDS5_ARATH	158	1e-48	Enhanced disease susceptibility 5 OS=Arabidopsis thaliana GN=EDS5 PE=2 SV=1	--	--	--	--	--	--	--	--	--	--	GO:0015893//drug transport;GO:0006952//defense response;GO:0051707//response to other organism;GO:0009696//salicylic acid metabolic process	GO:0015291//secondary active transmembrane transporter activity	GO:0009536//plastid
	Unigene10490	24.16	1.35	5.29	3.45	0.72	0	0	0	4.57	10.97	257	6	1.7953	gi|115464761|ref|NP_001055980.1|	75.9	1e-13	Os05g0506000 [Oryza sativa Japonica Group] >gi|113579531|dbj|BAF17894.1| Os05g0506000 [Oryza sativa Japonica Group]	--	--	--	--	--	--	--	--	--	--	--	--	--	--	GO:0009267//cellular response to starvation;GO:0006791//sulfur utilization;GO:0009555//pollen development	-	-
	Unigene10537	35.43	17.62	12.6	11.2	16.37	3.54	15.4	9.41	2.01	4.77	364	22	4.6477	gi|297811681|ref|XP_002873724.1|	56.6	8e-08	APG6/CLPB-P/CLPB3 [Arabidopsis lyrata subsp. lyrata] >gi|297319561|gb|EFH49983.1| APG6/CLPB-P/CLPB3 [Arabidopsis lyrata subsp. lyrata]	--	--	--	--	--	--	--	--	--	K03695	2e-09	57.8	vvi:100252611	ATP-dependent Clp protease ATP-binding subUnit ClpB	GO:0006950//response to stress;GO:0009657//plastid organization	GO:0017111//nucleoside-triphosphatase activity;GO:0032559//adenyl ribonucleotide binding	GO:0009532//plastid stroma
	Unigene10655	16.27	3.79	3.31	3.02	4.53	2.68	3.18	2.08	3.59	16.66	411	20	3.742	gi|224713823|gb|ACN62126.1|	130	6e-30	tryptophan decarboxylase [Capsicum annuum]	sp|Q7XHL3|TYDC1_ORYSJ	125	6e-29	Tyrosine decarboxylase 1 OS=Oryza sativa subsp. japonica GN=Os07g0437500 PE=2 SV=1	--	--	--	--	--	K01593	3e-33	137	pop:POPTR_816969	aromatic-L-amino-acid decarboxylase [EC:4.1.1.28]	GO:0006519//cellular amino acid and derivative metabolic process;GO:0006950//response to stress;GO:0043436	GO:0016831//carboxy-lyase activity;GO:0048037//cofactor binding	-
	Unigene11909	29.82	4.59	9.22	7.21	13.23	5.11	5.19	7.52	2.25	7.37	1548	345	17.1383	gi|167460238|gb|ABZ80831.1|	461	0	CYP86A32 fatty acid omega-hydroxylase [Quercus suber]	sp|P48422|C86A1_ARATH	434	0	Cytochrome P450 86A1 OS=Arabidopsis thaliana GN=CYP86A1 PE=1 SV=2	AGc2890	96.7	9e-23	COG2124	Cytochrome P450	K00517	0	434	ath:AT5G58860	[EC:1.14.-.-]	GO:0006631//fatty acid metabolic process	GO:0005506//iron ion binding;GO:0016713	GO:0043231//intracellular membrane-bounded organelle
	Unigene12081	22.95	11.43	10.42	10.06	5.71	6.77	7.45	1.31	2.01	4.42	652	61	7.1945	gi|87240440|gb|ABD32298.1|	252	3e-91	TGF-beta receptor, type I/II extracellular region [Medicago truncatula]	sp|Q9M817|PTR2X_ARATH	184	4e-46	Probable peptide transporter At1g52190 OS=Arabidopsis thaliana GN=At1g52190 PE=1 SV=1	--	--	--	--	--	K03305	1e-27	89.4	zma:100280282	proton-dependent oligopeptide transporter, POT family	GO:0015833//peptide transport	GO:0004871//signal transducer activity	GO:0044464//cell part
	Unigene12295	54	24.27	9.29	15.51	17.93	12.47	13.49	5.25	2.22	6.53	457	64	10.7692	gi|92897781|gb|ABE93893.1|	83.6	8e-16	Heavy metal transport/detoxification protein [Medicago truncatula]	--	--	--	--	--	--	--	--	--	--	--	--	--	--	GO:0006812//cation transport	GO:0043169//cation binding	-
	Unigene12320	2.82	0	1.2	0	0.66	0	1.33	0.61	2.13	4	282	5	1.3635	gi|225436865|ref|XP_002272498.1|	77.4	6e-20	PREDICTED: similar to F16N3.14 [Vitis vinifera]	sp|Q948J9|LIP2P_ARATH	70.1	2e-18	Plastidial lipoyltransferase 2 OS=Arabidopsis thaliana GN=LIP2p PE=2 SV=1	slr0994	44.7	1e-09	COG0321	Lipoate-protein ligase B	K03801	2e-21	77.4	vvi:100251103	lipoyl(octanoyl) transferase [EC:2.3.1.181]	GO:0043412;GO:0044237//cellular metabolic process	GO:0008415//acyltransferase activity	GO:0043231//intracellular membrane-bounded organelle
	Unigene13393	117.76	9.14	10.07	11.39	17.18	2.12	47.41	1.13	2.48	6.6	607	186	23.5637	gi|115447803|ref|NP_001047681.1|	162	3e-39	Os02g0667500 [Oryza sativa Japonica Group] >gi|50251859|dbj|BAD27788.1| tetracycline transporter protein-like [Oryza sativa Japonica Group] >gi|50252129|dbj|BAD28125.1| tetracycline transporter protein-like [Oryza sativa Japonica Group] >gi|113537212|dbj|BAF09595.1| Os02g0667500 [Oryza sativa Japonica Group]	sp|P02982|TCR1_ECOLX	53.9	7e-07	Tetracycline resistance protein, class A OS=Escherichia coli GN=tetA PE=3 SV=2	DR0472	56.2	4e-08	COG0477	Permeases of the major facilitator superfamily	--	--	--	--	--	GO:0006810//transport	-	GO:0031410//cytoplasmic vesicle
	Unigene13470	27.72	8.58	4.34	6.23	5.06	4.11	6.57	4.65	3.23	13.87	626	77	9.4588	gi|228485371|gb|ACQ44234.1|	322	2e-87	EDS5 [Glycine max]	sp|Q945F0|EDS5_ARATH	295	2e-79	Enhanced disease susceptibility 5 OS=Arabidopsis thaliana GN=EDS5 PE=2 SV=1	BS_ypnP	52.4	6e-07	COG0534	Na+-driven multidrug efflux pump	--	--	--	--	--	GO:0015893//drug transport;GO:0006952//defense response;GO:0051707//response to other organism;GO:0009696//salicylic acid metabolic process	GO:0015291//secondary active transmembrane transporter activity	GO:0009536//plastid
	Unigene13517	58.28	12.05	9.72	6.89	7.23	15.41	25.6	23.47	2.28	5.8	489	59	9.2782	gi|42567425|ref|NP_195289.3|	134	2e-36	ATSERAT3;2 (Serine acetyltransferase 3;2); acetyltransferase/ serine O-acetyltransferase [Arabidopsis thaliana] >gi|75162049|sp|Q8W2B8.1|SAT4_ARATH RecName: Full=Serine acetyltransferase 4; Short=AtSAT-4; Short=AtSERAT3;2 >gi|17225592|gb|AAL37489.1|AF331847_1 serine acetyltransferase [Arabidopsis thaliana]	sp|Q8W2B8|SAT4_ARATH	134	1e-36	Serine acetyltransferase 4 OS=Arabidopsis thaliana GN=SAT4 PE=1 SV=1	NMB0560	71.2	8e-13	COG1045	Serine acetyltransferase	K00640	2e-43	139	rcu:RCOM_0873360	serine O-acetyltransferase [EC:2.3.1.30]	GO:0006790//sulfur metabolic process;GO:0006563//L-serine metabolic process	GO:0016412//serine O-acyltransferase activity	GO:0044444//cytoplasmic part
	Unigene16609	113.76	0.32	0.48	1.65	0.17	18.69	29.63	0.48	3.84	8.92	1072	290	20.8029	gi|224123896|ref|XP_002319191.1|	405	1e-112	Ca2+ antiporter/cation exchanger [Populus trichocarpa] >gi|222857567|gb|EEE95114.1| Ca2+ antiporter/cation exchanger [Populus trichocarpa]	sp|Q9SYG9|CCX4_ARATH	277	1e-73	Cation/calcium exchanger 4 OS=Arabidopsis thaliana GN=CCX4 PE=2 SV=1	SPAC3A12.06c	106	8e-23	COG0530	Ca2+/Na+ antiporter	--	--	--	--	--	GO:0006811//ion transport	GO:0015298//solute:cation antiporter activity	GO:0043231//intracellular membrane-bounded organelle
	Unigene16773	40.28	0.38	0	0.38	0.81	15.77	12.78	0	2.55	5.23	921	94	7.8485	gi|85541788|sp|Q56Y11.2|DDPS2_ARATH	341	8e-93	RecName: Full=Dehydrodolichyl diphosphate synthase 2; Short=Dedol-PP synthase 2 >gi|208879536|gb|ACI31313.1| At5g58770 [Arabidopsis thaliana]	sp|Q56Y11|DDPS2_ARATH	341	5e-93	Dehydrodolichyl diphosphate synthase 2 OS=Arabidopsis thaliana GN=At5g58770 PE=2 SV=2	all2995	241	1e-63	COG0020	Undecaprenyl pyrophosphate synthase	K11778	4e-94	341	ath:AT5G58770	cis-prenyltransferase, dehydrodolichyl diphosphate synthase [EC:2.5.1.-]	GO:0016094//polyprenol biosynthetic process	GO:0046872//metal ion binding;GO:0005515//protein binding;GO:0004659//prenyltransferase activity	GO:0009536//plastid
	Unigene16964	52.87	11.77	9.35	9.1	2.39	7.42	2.06	0	4.49	10.45	545	60	8.4659	gi|71999171|gb|AAZ57445.1|	65.5	4e-15	lipoxygenase LOX2 [Populus deltoides]	--	--	--	--	--	--	--	--	--	K00454	2e-07	49.7	osa:4328603	lipoxygenase [EC:1.13.11.12]	GO:0006633//fatty acid biosynthetic process	GO:0046872//metal ion binding;GO:0016702//oxidoreductase activity, acting on single donors with incorporation of molecular oxygen, incorporation of two atoms of oxygen	-
	Unigene17211	30.57	2.1	0.88	3.68	5.8	1.91	4.85	2.37	5.27	15.63	578	81	10.7765	gi|15233475|ref|NP_193190.1|	147	4e-37	NF-YB3 (NUCLEAR FACTOR Y, SUBUniT B3); transcription factor [Arabidopsis thaliana] >gi|75219213|sp|O23310.1|NFYB3_ARATH RecName: Full=Nuclear transcription factor Y subUnit B-3; Short=AtNF-YB-3; AltName: Full=Transcriptional activator HAP3C >gi|2244810|emb|CAB10233.1| CCAAT-binding transcription factor subUnit A(CBF-A) [Arabidopsis thaliana] >gi|7268160|emb|CAB78496.1| CCAAT-binding transcription…	sp|O23310|NFYB3_ARATH	147	2e-37	Nuclear transcription factor Y subUnit B-3 OS=Arabidopsis thaliana GN=NFYB3 PE=2 SV=1	SPAC23C11.08	104	1e-22	COG2036	Histones H3 and H4	K02326	4e-08	54.7	osa:4347894	DNA polymerase epsilon subUnit 3 [EC:2.7.7.7]	GO:0006351//transcription, DNA-dependent	GO:0003677//DNA binding	GO:0043231//intracellular membrane-bounded organelle
	Unigene17490	94.7	31.15	21	27.7	30.82	20.4	45	18.88	2.1	7.35	2604	1051	31.0371	gi|87162732|gb|ABD28527.1|	1356	0	Protein kinase [Medicago truncatula]	sp|Q9M9S4|Y1143_ARATH	478	1e-133	Probable LRR receptor-like serine/threonine-protein kinase At1g14390 OS=Arabidopsis thaliana GN=At1g14390 PE=2 SV=1	MA2301_1	81.6	6e-15	COG4886	Leucine-rich repeat (LRR) protein	K13415	8e-55	212	pop:POPTR_562744	protein brassinosteroid insensitive 1 [EC:2.7.10.1 2.7.11.1]	GO:0006464//protein modification process;GO:0007167//enzyme linked receptor protein signaling pathway	GO:0004672//protein kinase activity;GO:0016628//oxidoreductase activity, acting on the CH-CH group of donors, NAD or NADP as acceptor;GO:0032559//adenyl ribonucleotide binding	GO:0031410//cytoplasmic vesicle
	Unigene18434	12.74	1.16	2.26	1.18	0	4.9	2.49	0	2.6	6.45	150	3	1.538	gi|18377862|gb|AAL67117.1|	63.9	5e-10	AT5g23690/MQM1_4 [Arabidopsis thaliana] >gi|22137254|gb|AAM91472.1| AT5g23690/MQM1_4 [Arabidopsis thaliana]	--	--	--	--	--	--	--	--	--	K00974	9e-09	55.1	ath:AT1G28090	tRNA nucleotidyltransferase (CCA-adding enzyme) [EC:2.7.7.25 2.7.7.21 3.1.3.- 3.1.4.-]	GO:0010467//gene expression	GO:0070566//adenylyltransferase activity;GO:0003676//nucleic acid binding	GO:0043231//intracellular membrane-bounded organelle
	Unigene18525	1208.86	276.13	156.25	207.92	155.15	14.71	271.59	312.87	3.86	9.93	150	317	162.513	gi|84514151|gb|ABC59084.1|	73.6	7e-13	cytochrome P450 monooxygenase CYP83G1 [Medicago truncatula]	sp|Q9LTL8|C71BO_ARATH	69.7	5e-12	Cytochrome P450 71B24 OS=Arabidopsis thaliana GN=CYP71B24 PE=2 SV=1	alr1450	53.1	1e-07	COG2124	Cytochrome P450	K00517	4e-13	69.7	ath:AT3G26230	[EC:1.14.-.-]	GO:0008152//metabolic process	GO:0016491//oxidoreductase activity;GO:0005506//iron ion binding	GO:0044464//cell part
	Unigene18600	268.52	20.8	13.59	11.81	4.96	56.37	122.09	5.71	2.2	5.49	150	154	78.9495	gi|299474328|gb|ADJ18377.1|	107	3e-23	ribulose-1,5-bisphosphate carboxylase/oxygenase large subUnit [Halogeton glomeratus]	sp|P00875|RBL_SPIOL	107	2e-23	Ribulose bisphosphate carboxylase large chain OS=Spinacia oleracea GN=rbcL PE=1 SV=1	slr0009	97.4	6e-21	COG1850	Ribulose 1,5-bisphosphate carboxylase, large subUnit	K01601	2e-24	107	zma:845212	ribulose-bisphosphate carboxylase large chain [EC:4.1.1.39]	GO:0043094//cellular metabolic compound salvage;GO:0015977//carbon utilization by fixation of carbon dioxide	GO:0046872//metal ion binding;GO:0016491//oxidoreductase activity;GO:0016831//carboxy-lyase activity	GO:0009536//plastid
	Unigene19028	10.54	2.3	2.25	3.52	0	1.22	1.24	0	2.99	7.03	151	2	1.0185	gi|12322504|gb|AAG51258.1|AC025782_3	58.9	2e-08	Ty1/copia-element polyprotein [Arabidopsis thaliana]	sp|P04146|COPIA_DROME	52.4	9e-07	Copia protein OS=Drosophila melanogaster GN=GIP PE=1 SV=3	--	--	--	--	--	--	--	--	--	--	GO:0006259//DNA metabolic process	GO:0003676//nucleic acid binding;GO:0046872//metal ion binding;GO:0016740//transferase activity	-
	Unigene19697	5.2	0	0	0	0	0	2.44	0	2.13	5.26	153	2	1.0052	gi|110931678|gb|ABH02838.1|	74.7	3e-13	MYB transcription factor MYB82 [Glycine max]	sp|Q9LXV2|MYB46_ARATH	61.2	2e-09	Transcription factor MYB46 OS=Arabidopsis thaliana GN=MYB46 PE=2 SV=1	--	--	--	--	--	K09422	1e-10	61.2	ath:AT5G12870	myb proto-oncogene protein, plant	GO:0010468//regulation of gene expression;GO:0006351//transcription, DNA-dependent;GO:0010033//response to organic substance;GO:0009832//plant-type cell wall biogenesis	GO:0003676//nucleic acid binding	GO:0043231//intracellular membrane-bounded organelle
	Unigene19880	811.61	12.46	5.55	1.16	0	124.96	29.31	0	6.5	17.33	153	235	118.113	gi|18398546|ref|NP_565427.1|	67.4	5e-11	cold-shock DNA-binding family protein [Arabidopsis thaliana] >gi|148726892|dbj|BAF63841.1| cold shock domain protein 3 [Arabidopsis thaliana]	sp|P27484|GRP2_NICSY	64.3	2e-10	Glycine-rich protein 2 OS=Nicotiana sylvestris GN=GRP-2 PE=2 SV=1	XF2352	50.4	8e-07	COG1278	Cold shock proteins	K09250	1e-10	61.2	ath:AT4G36020	cellular nucleic acid-binding protein	GO:0048437//floral organ development;GO:0032392//DNA geometric change;GO:0006351//transcription, DNA-dependent;GO:0006950//response to stress	GO:0003723//RNA binding;GO:0046914//transition metal ion binding;GO:0043566//structure-specific DNA binding	GO:0031981//nuclear lumen;GO:0016020//membrane
	Unigene20061	417.64	93.4	41.91	29.92	3.63	0	183.23	0	2.28	5.45	154	37	18.4757	gi|124014020|gb|ABM88259.1|	87.4	4e-17	lipoxygenase [Phaseolus vulgaris]	sp|Q9LNR3|LOX3_ARATH	68.2	2e-11	Lipoxygenase 3, chloroplastic OS=Arabidopsis thaliana GN=LOX3 PE=2 SV=1	--	--	--	--	--	K00454	1e-12	68.2	ath:AT1G17420	lipoxygenase [EC:1.13.11.12]	GO:0006633//fatty acid biosynthetic process	GO:0046914//transition metal ion binding;GO:0016702//oxidoreductase activity, acting on single donors with incorporation of molecular oxygen, incorporation of two atoms of oxygen	-
	Unigene21418	431.54	103.54	60.88	101.42	30.44	2.31	1.18	0	4.17	8.41	159	116	56.1023	gi|122894102|gb|ABM67697.1|	75.9	1e-13	MADs-box protein [Citrus sinensis]	sp|Q41276|AP1_SINAL	75.9	7e-14	Floral homeotic protein APETALA 1 OS=Sinapis alba GN=AP1 PE=2 SV=1	YPL089c	50.8	6e-07	COG5068	Regulator of arginine metabolism and related MADS box-containing transcription factors	K09264	5e-15	75.9	ath:AT1G69120	MADS-box transcription factor, plant	GO:0010468//regulation of gene expression;GO:0006351//transcription, DNA-dependent;GO:0032501//multicellular organismal process	GO:0030528//transcription regulator activity;GO:0003677//DNA binding;GO:0016628//oxidoreductase activity, acting on the CH-CH group of donors, NAD or NADP as acceptor	GO:0043231//intracellular membrane-bounded organelle
	Unigene21778	12.94	4.33	2.12	4.43	3.49	0	3.5	0	2.92	5.46	160	2	0.9612	gi|77563563|gb|ABB00038.1|	84.7	3e-16	reverse transcriptase family member [Glycine max]	--	--	--	--	--	--	--	--	--	--	--	--	--	--	GO:0006352//transcription initiation;GO:0006260//DNA replication	GO:0030528//transcription regulator activity;GO:0003676//nucleic acid binding;GO:0034061	GO:0005667//transcription factor complex
	Unigene22414	18.56	8.51	6.25	3.26	6.85	1.13	2.29	0	2.18	4.54	163	11	5.1895	gi|177667009|gb|ACB73218.1|	98.2	3e-20	homeodomain protein GL2-like 1 [Gossypium hirsutum]	sp|Q9M2E8|HDG1_ARATH	91.3	2e-18	Homeobox-leucine zipper protein HDG1 OS=Arabidopsis thaliana GN=HDG1 PE=2 SV=1	--	--	--	--	--	K09338	1e-19	91.3	ath:AT3G61150	homeobox-leucine zipper protein	GO:0010468//regulation of gene expression;GO:0006351//transcription, DNA-dependent	GO:0003677//DNA binding	GO:0043231//intracellular membrane-bounded organelle
	Unigene22802	15.53	0	0	0	3.41	2.24	5.7	0	2.73	6.15	164	2	0.9378	gi|224137498|ref|XP_002327141.1|	78.2	3e-14	cytochrome P450 [Populus trichocarpa] >gi|222835456|gb|EEE73891.1| cytochrome P450 [Populus trichocarpa]	sp|Q9LJK2|ABAH4_ARATH	70.1	4e-12	Abscisic acid 8'-hydroxylase 4 OS=Arabidopsis thaliana GN=CYP707A4 PE=2 SV=2	--	--	--	--	--	K09843	3e-13	70.1	ath:AT3G19270	(+)-abscisic acid 8'-hydroxylase [EC:1.14.13.93]	GO:0008152//metabolic process	GO:0016709//oxidoreductase activity, acting on paired donors, with incorporation or reduction of molecular oxygen, NADH or NADPH as one donor, and incorporation of one atom of oxygen;GO:0005506//iron ion binding	-
	Unigene23346	89.19	34.45	16.37	36.29	14.58	27.69	14.63	1.03	2.46	5.41	166	21	9.7282	gi|18252325|gb|AAL66194.1|AF386512_1	56.2	1e-07	cytochrome P450 [Pyrus commUnis]	--	--	--	--	--	--	--	--	--	--	--	--	--	--	GO:0008152//metabolic process	GO:0016491//oxidoreductase activity;GO:0005506//iron ion binding	-
	Unigene23406	139.18	2.08	0	11.67	14.49	56.14	0	0	2.48	6.25	167	142	65.3871	gi|297851004|ref|XP_002893383.1|	57.4	5e-08	alpha-expansin 10 precursor [Arabidopsis lyrata subsp. lyrata] >gi|297339225|gb|EFH69642.1| alpha-expansin 10 precursor [Arabidopsis lyrata subsp. lyrata]	sp|Q9LDR9|EXP10_ARATH	54.3	2e-07	Expansin-A10 OS=Arabidopsis thaliana GN=EXPA10 PE=2 SV=1	--	--	--	--	--	--	--	--	--	--	GO:0009827//plant-type cell wall modification;GO:0009653//anatomical structure morphogenesis	GO:0005198//structural molecule activity	GO:0005618//cell wall
	Unigene23688	26.53	1.03	1.01	3.16	0	8.75	0	1.02	3.03	7.87	168	2	0.9155	gi|30689711|ref|NP_849712.1|	67	6e-11	KDR (KIDARI); transcription regulator [Arabidopsis thaliana] >gi|28416803|gb|AAO42932.1| At1g26948 [Arabidopsis thaliana]	sp|Q9CA64|BH135_ARATH	61.6	1e-09	Transcription factor bHLH135 OS=Arabidopsis thaliana GN=BHLH135 PE=4 SV=1	--	--	--	--	--	--	--	--	--	--	GO:0010468//regulation of gene expression;GO:0009314//response to radiation	-	GO:0009536//plastid
	Unigene24721	24.99	11.08	5.92	6.18	5.41	8.55	11.95	7.97	2.09	6.56	172	2	0.8942	gi|297835692|ref|XP_002885728.1|	75.9	1e-13	6-phosphogluconate dehydrogenase NAD-binding domain-containing protein [Arabidopsis lyrata subsp. lyrata] >gi|297331568|gb|EFH61987.1| 6-phosphogluconate dehydrogenase NAD-binding domain-containing protein [Arabidopsis lyrata subsp. lyrata]	sp|Q562D5|GLYR1_XENTR	50.8	2e-06	Putative oxidoreductase GLYR1 OS=Xenopus tropicalis GN=glyr1 PE=2 SV=1	SSO1560	48.5	3e-06	COG2084	3-hydroxyisobutyrate dehydrogenase and related beta-hydroxyacid dehydrogenases	K00033	1e-06	48.1	cme:CMS195C	6-phosphogluconate dehydrogenase [EC:1.1.1.44]	GO:0009081//branched chain family amino acid metabolic process;GO:0006950//response to stress;GO:0006007//glucose catabolic process	GO:0016616//oxidoreductase activity, acting on the CH-OH group of donors, NAD or NADP as acceptor;GO:0048037//cofactor binding	GO:0044444//cytoplasmic part
	Unigene2475	47.12	14.14	14.71	10.05	5.99	14.21	7.44	6.19	3.2	9.32	3014	545	13.9051	gi|108864446|gb|ABA94062.2|	669	0	CarD-like transcriptional regulator family protein, expressed [Oryza sativa (japonica cultivar-group)]	sp|Q55750|MFD_SYNY3	401	5e-142	Transcription-repair-coupling factor OS=Synechocystis sp. (strain PCC 6803) GN=mfd PE=3 SV=1	sll0377	401	1e-142	COG1197	Transcription-repair coupling factor (superfamily II helicase)	K03655	6e-47	168	ath:AT2G01440	ATP-dependent DNA helicase RecG [EC:3.6.1.-]	GO:0006259//DNA metabolic process;GO:0006351//transcription, DNA-dependent	GO:0042623//ATPase activity, coupled;GO:0003677//DNA binding;GO:0016209//antioxidant activity;GO:0032559//adenyl ribonucleotide binding	GO:0009536//plastid
	Unigene25302	16.47	4.98	4.88	6.11	1.07	1.06	4.3	6.89	2.39	5.35	174	3	1.3258	gi|296082526|emb|CBI21531.3|	74.3	4e-13	unnamed protein product [Vitis vinifera]	--	--	--	--	--	--	--	--	--	--	--	--	--	--	GO:0006260//DNA replication	GO:0003676//nucleic acid binding;GO:0034061	-
	Unigene25412	332.96	50.5	24.26	33.42	25.53	47.27	91.84	0	3.63	10.24	175	51	22.4105	gi|297813247|ref|XP_002874507.1|	92	2e-18	arginase [Arabidopsis lyrata subsp. lyrata] >gi|297320344|gb|EFH50766.1| arginase [Arabidopsis lyrata subsp. lyrata]	sp|P46637|ARGI1_ARATH	90.5	3e-18	Arginase OS=Arabidopsis thaliana GN=At4g08900 PE=2 SV=1	--	--	--	--	--	K01476	2e-19	90.5	ath:AT4G08900	arginase [EC:3.5.3.1]	GO:0006952//defense response;GO:0009446//putrescine biosynthetic process;GO:0006525//arginine metabolic process	GO:0016813//hydrolase activity, acting on carbon-nitrogen (but not peptide) bonds, in linear amidines;GO:0046914//transition metal ion binding	GO:0009536//plastid
	Unigene25871	10.85	2.95	0	0	0	1.04	5.31	0.97	2.04	4.71	176	4	1.7477	gi|115187508|gb|ABI84257.1|	84.7	3e-16	triacylglycerol lipase [Arachis hypogaea]	sp|Q680C0|GDL62_ARATH	75.1	1e-13	GDSL esterase/lipase At4g10955 OS=Arabidopsis thaliana GN=At4g10955 PE=2 SV=1	--	--	--	--	--	--	--	--	--	--	GO:0044238//primary metabolic process	GO:0004091//carboxylesterase activity	-
	Unigene26034	1299.69	20.56	6.72	6.01	45.23	576.41	195.32	3.87	2.25	5.56	177	246	106.876	gi|139478726|gb|ABO77634.1|	124	3e-28	peroxidase [Medicago truncatula]	sp|Q9LEH3|PER15_IPOBA	91.3	2e-18	Peroxidase 15 OS=Ipomoea batatas GN=pod PE=1 SV=1	--	--	--	--	--	K00430	4e-16	79.7	ath:AT2G38380	peroxidase [EC:1.11.1.7]	GO:0008152//metabolic process;GO:0006950//response to stress	GO:0005506//iron ion binding;GO:0003824//catalytic activity;GO:0016209//antioxidant activity	-
	Unigene27062	0.88	0	0	0	0	0	0	0	#DIV/0!	#DIV/0!	181	3	1.2746	gi|124359710|gb|ABN06064.1|	111	3e-24	RNA-directed DNA polymerase (Reverse transcriptase); Chromo; Zinc finger, CCHC-type; Peptidase aspartic, active site; Polynucleotidyl transferase, Ribonuclease H fold [Medicago truncatula]	sp|Q7LHG5|YI31B_YEAST	67.4	3e-11	Transposon Ty3-I Gag-Pol polyprotein OS=Saccharomyces cerevisiae GN=TY3B-I PE=3 SV=2	YIL082w-a_2	67.4	6e-12	COG2801	Transposase and inactivated derivatives	--	--	--	--	--	GO:0006952//defense response;GO:0012501//programmed cell death;GO:0006260//DNA replication;GO:0019538//protein metabolic process;GO:0006325//chromatin organization	GO:0003676//nucleic acid binding;GO:0004175//endopeptidase activity;GO:0046914//transition metal ion binding;GO:0004872//receptor activity;GO:0034061;GO:0032559//adenyl ribonucleotide binding	GO:0043231//intracellular membrane-bounded organelle;GO:0044427//chromosomal part;GO:0044425//membrane part
	Unigene27073	1903.37	244.15	112.6	167.41	29.83	5.08	539.98	0	3.52	9.11	181	418	177.59	gi|124014020|gb|ABM88259.1|	93.6	6e-19	lipoxygenase [Phaseolus vulgaris]	sp|P38418|LOX2_ARATH	78.2	1e-14	Lipoxygenase 2, chloroplastic OS=Arabidopsis thaliana GN=LOX2 PE=1 SV=1	--	--	--	--	--	K00454	1e-15	78.2	ath:AT3G45140	lipoxygenase [EC:1.13.11.12]	GO:0006633//fatty acid biosynthetic process	GO:0046914//transition metal ion binding;GO:0016702//oxidoreductase activity, acting on single donors with incorporation of molecular oxygen, incorporation of two atoms of oxygen	-
	Unigene2772	5.35	0.97	0	0	1.04	2.06	0.52	0	2.6	6.12	357	5	1.077	gi|4530126|gb|AAD21872.1|	110	3e-36	receptor-like protein kinase homolog RK20-1 [Phaseolus vulgaris]	sp|Q8S9L6|CRK29_ARATH	91.3	4e-31	Cysteine-rich receptor-like protein kinase 29 OS=Arabidopsis thaliana GN=CRK29 PE=2 SV=1	--	--	--	--	--	K00924	1e-11	46.2	ath:AT1G75820	[EC:2.7.1.-]	GO:0006464//protein modification process	GO:0004871//signal transducer activity;GO:0004713//protein tyrosine kinase activity;GO:0032559//adenyl ribonucleotide binding	-
	Unigene28306	9.42	0.93	2.74	1.91	2	1.98	4.02	0	2.34	5.87	186	6	2.4806	gi|224122014|ref|XP_002330709.1|	80.9	4e-15	cytochrome P450 [Populus trichocarpa] >gi|222872313|gb|EEF09444.1| cytochrome P450 [Populus trichocarpa]	sp|Q43068|C82A1_PEA	55.8	8e-08	Cytochrome P450 82A1 (Fragment) OS=Pisum sativum GN=CYP82A1 PE=2 SV=2	--	--	--	--	--	K00517	6e-09	55.8	ath:AT4G37330	[EC:1.14.-.-]	GO:0008152//metabolic process	GO:0016709//oxidoreductase activity, acting on paired donors, with incorporation or reduction of molecular oxygen, NADH or NADPH as one donor, and incorporation of one atom of oxygen;GO:0005506//iron ion binding	-
	Unigene28459	282.64	22.24	19.98	40.75	53.76	140.58	119.92	8.24	2.01	4.33	187	170	69.9081	gi|15626365|emb|CAC69955.1|	92.4	1e-18	granule-bound starch synthase [Pisum sativum]	sp|O82627|SSG1_ANTMA	82.8	6e-16	Granule-bound starch synthase 1, chloroplastic/amyloplastic OS=Antirrhinum majus GN=WAXY PE=2 SV=1	--	--	--	--	--	--	--	--	--	--	GO:0005977//glycogen metabolic process	GO:0035251//UDP-glucosyltransferase activity	-
	Unigene29070	8.42	1.83	2.7	0	0	0.97	0	0	3.12	6.95	189	3	1.2206	gi|297794729|ref|XP_002865249.1|	131	3e-30	sodium:solute symporter family protein [Arabidopsis lyrata subsp. lyrata] >gi|297311084|gb|EFH41508.1| sodium:solute symporter family protein [Arabidopsis lyrata subsp. lyrata]	sp|O94469|DUR31_SCHPO	90.9	2e-18	Probable urea active transporter 1 OS=Schizosaccharomyces pombe GN=dur3-1 PE=2 SV=1	SPBC23G7.13c	90.9	5e-19	COG0591	Na+/proline symporter	--	--	--	--	--	GO:0030001//metal ion transport	-	GO:0031224//intrinsic to membrane
	Unigene29219	160.04	36.48	35.75	64.35	21.56	61.92	13.77	0	2.49	5.3	190	66	26.7122	gi|18252325|gb|AAL66194.1|AF386512_1	100	6e-21	cytochrome P450 [Pyrus commUnis]	sp|Q50EK4|C75A1_PINTA	75.5	1e-13	Cytochrome P450 750A1 OS=Pinus taeda GN=CYP750A1 PE=2 SV=1	--	--	--	--	--	K00517	9e-12	65.1	ath:AT3G26200	[EC:1.14.-.-]	GO:0006259//DNA metabolic process	GO:0003676//nucleic acid binding;GO:0016709//oxidoreductase activity, acting on paired donors, with incorporation or reduction of molecular oxygen, NADH or NADPH as one donor, and incorporation of one atom of oxygen;GO:0005506//iron ion binding	-
	Unigene29312	10.89	1.82	0.89	0	0	0	0	1.8	5.97	11.89	190	4	1.6189	gi|296040759|gb|ADG85347.1|	127	3e-29	NADH dehydrogenase subUnit 5 [Silene latifolia]	sp|Q37680|NU5M_WHEAT	127	2e-29	NADH-ubiquinone oxidoreductase chain 5 OS=Triticum aestivum GN=ND5 PE=3 SV=1	mll1355	84.3	5e-17	COG1009	NADH:ubiquinone oxidoreductase subUnit 5 (chain L)/MultisubUnit Na+/H+ antiporter, MnhA subUnit	K03883	2e-27	117	ath:ArthMp006	NADH dehydrogenase I subUnit 5 [EC:1.6.5.3]	GO:0051234//establishment of localization;GO:0022904//respiratory electron transport chain	GO:0050136//NADH dehydrogenase (quinone) activity	GO:0031224//intrinsic to membrane;GO:0005746//mitochondrial respiratory chain
	Unigene31141	4.04	0	0	0	0.95	1.87	1.9	0.87	2.13	3.84	197	3	1.171	gi|53749484|gb|AAU90337.1|	58.9	2e-08	Putative receptor kinase-like protein, identical [Solanum demissum]	sp|C0LGP4|Y3475_ARATH	50.1	4e-06	Probable LRR receptor-like serine/threonine-protein kinase At3g47570 OS=Arabidopsis thaliana GN=At3g47570 PE=1 SV=1	--	--	--	--	--	K13428	5e-07	49.3	ath:AT5G20480	LRR receptor-like serine/threonine-protein kinase EFR [EC:2.7.11.1]	GO:0008152//metabolic process	GO:0004672//protein kinase activity;GO:0000166//nucleotide binding	GO:0016020//membrane
	Unigene31581	899.72	98.03	110.65	149.46	118.48	29.71	7.55	4.33	6.02	14.02	198	783	304.1	gi|18390691|ref|NP_563772.1|	84.3	4e-16	lipase class 3 family protein [Arabidopsis thaliana] >gi|15529151|gb|AAK97670.1| At1g06800/F4H5_10 [Arabidopsis thaliana] >gi|27363430|gb|AAO11634.1| At1g06800/F4H5_10 [Arabidopsis thaliana]	--	--	--	--	--	--	--	--	--	--	--	--	--	--	GO:0044238//primary metabolic process	GO:0004091//carboxylesterase activity	GO:0009536//plastid
	Unigene31778	31.2	0	0	0	0.94	3.7	6.57	0.86	4.75	11.76	199	4	1.5457	gi|5902394|gb|AAD55496.1|AC008148_6	85.1	2e-16	Putative phosphoglucomutase [Arabidopsis thaliana] >gi|30725426|gb|AAP37735.1| At1g70820 [Arabidopsis thaliana]	--	--	--	--	--	--	--	--	--	K01840	2e-14	73.9	osa:4341038	phosphomannomutase [EC:5.4.2.8]	GO:0044238//primary metabolic process	GO:0016868//intramolecular transferase activity, phosphotransferases	GO:0009536//plastid
	Unigene32013	86.76	21.66	10.19	8.86	1.86	6.43	15.88	1.71	4.01	10.61	200	75	28.8371	gi|89574458|gb|ABD77420.1|	111	2e-24	senescence-associated nodulin 1A [Glycine max]	sp|Q9M547|FLS_EUSGR	63.9	3e-10	Flavonol synthase/flavanone 3-hydroxylase OS=Eustoma grandiflorum GN=FLS PE=2 SV=1	PA0147	53.1	1e-07	COG3491	Isopenicillin N synthase and related dioxygenases	K06892	5e-21	95.9	ath:AT3G19010		GO:0009699//phenylpropanoid biosynthetic process	GO:0046914//transition metal ion binding;GO:0016706//oxidoreductase activity, acting on paired donors, with incorporation or reduction of molecular oxygen, 2-oxoglutarate as one donor, and incorporation of one atom each of oxygen into both donors	-
	Unigene32141	6.37	0.87	0	0.89	0	0	0	2.57	2.48	6.02	200	5	1.9225	gi|224111342|ref|XP_002332941.1|	55.5	2e-07	cc-nbs-lrr resistance protein [Populus trichocarpa] >gi|222834195|gb|EEE72672.1| cc-nbs-lrr resistance protein [Populus trichocarpa]	sp|Q9LRR4|R13L1_ARATH	52	1e-06	Putative disease resistance RPP13-like protein 1 OS=Arabidopsis thaliana GN=RPPL1 PE=2 SV=1	--	--	--	--	--	--	--	--	--	--	GO:0009987//cellular process	GO:0005488//binding	-
	Unigene32250	3.17	0	0	0.88	0	0	0	0	3.59	9.13	201	4	1.5303	gi|297604259|ref|NP_001055181.2|	103	5e-22	Os05g0318100 [Oryza sativa Japonica Group] >gi|255676238|dbj|BAF17095.2| Os05g0318100 [Oryza sativa Japonica Group]	sp|Q9M342|WAKLP_ARATH	95.1	1e-19	Wall-associated receptor kinase-like 15 OS=Arabidopsis thaliana GN=WAKL15 PE=2 SV=2	--	--	--	--	--	K00924	4e-12	66.2	osa:4333912	[EC:2.7.1.-]	GO:0006464//protein modification process	GO:0016859//cis-trans isomerase activity;GO:0004702//receptor signaling protein serine/threonine kinase activity;GO:0004713//protein tyrosine kinase activity;GO:0032559//adenyl ribonucleotide binding	GO:0031410//cytoplasmic vesicle
	Unigene32483	7.09	0	0	0	0	0.91	0.93	0	7.67	15.26	202	3	1.1421	gi|445619|prf||1909366A	65.9	1e-10	Leu zipper protein	--	--	--	--	--	--	--	--	--	K07195	1e-07	51.6	ath:AT1G07000	exocyst complex component 7	GO:0016192//vesicle-mediated transport	-	GO:0043231//intracellular membrane-bounded organelle;GO:0044444//cytoplasmic part;GO:0016020//membrane
	Unigene32591	187.57	38.61	12.61	10.53	1.84	16.38	76.79	74.62	2.44	4.95	202	145	55.1997	gi|189008470|gb|ACD68477.1|	127	3e-29	plasma membrane mannitol transporter [Arachis hypogaea]	sp|Q8VZ80|PLT5_ARATH	125	6e-29	Polyol transporter 5 OS=Arabidopsis thaliana GN=PLT5 PE=1 SV=2	Cgl0181	55.8	2e-08	COG0477	Permeases of the major facilitator superfamily	--	--	--	--	--	GO:0008152//metabolic process;GO:0006810//transport	GO:0016628//oxidoreductase activity, acting on the CH-CH group of donors, NAD or NADP as acceptor;GO:0022857//transmembrane transporter activity	GO:0031224//intrinsic to membrane
	Unigene32706	17.34	0	0	0	0.92	0	5.55	0	3.12	7.93	202	4	1.5228	gi|226498596|ref|NP_001152139.1|	133	5e-31	LHT1 [Zea mays] >gi|195653153|gb|ACG46044.1| LHT1 [Zea mays]	sp|Q9FKS8|LHT1_ARATH	132	5e-31	Lysine histidine transporter 1 OS=Arabidopsis thaliana GN=LHT1 PE=1 SV=1	--	--	--	--	--	--	--	--	--	--	GO:0006865//amino acid transport	GO:0015171//amino acid transmembrane transporter activity	GO:0043231//intracellular membrane-bounded organelle;GO:0031224//intrinsic to membrane
	Unigene32745	3.92	0.85	0	0	0.92	0	0.92	1.69	2.32	5.08	203	5	1.8941	gi|225423855|ref|XP_002281154.1|	124	3e-28	PREDICTED: similar to CHUP1 (CHLOROPLAST UNUSUAL POSITIONING 1) [Vitis vinifera]	sp|Q9LI74|CHUP1_ARATH	116	4e-26	Protein CHUP1, chloroplastic OS=Arabidopsis thaliana GN=CHUP1 PE=1 SV=1	--	--	--	--	--	--	--	--	--	--	GO:0009658//chloroplast organization	-	GO:0009527//plastid outer membrane
	Unigene32786	289.38	142.57	133.02	68.96	46.77	14.49	86.53	8.44	2.03	4.1	203	252	95.4607	gi|84514195|gb|ABC59106.1|	117	3e-26	cytochrome P450 monooxygenase CYP72A62 [Medicago truncatula]	sp|Q05047|C72A1_CATRO	94.4	2e-19	Secologanin synthase OS=Catharanthus roseus GN=CYP72A1 PE=2 SV=1	--	--	--	--	--	K07424	1e-18	87.8	sbi:SORBI_03g028720	cytochrome P450, family 3, subfamily A [EC:1.14.14.1]	GO:0008152//metabolic process	GO:0016491//oxidoreductase activity;GO:0005506//iron ion binding	-
	Unigene33008	14.83	4.25	0.83	4.34	2.74	1.8	0.92	3.36	3.41	8.32	204	2	0.7539	gi|2791900|emb|CAA03886.1|	106	9e-23	PP7 [Arabidopsis thaliana]	sp|Q9FN02|PPP7_ARATH	106	5e-23	Serine/threonine-protein phosphatase 7 OS=Arabidopsis thaliana GN=PP7 PE=1 SV=1	YDR075w	59.3	2e-09	COG0639	Diadenosine tetraphosphatase and related serine/threonine protein phosphatases	K04382	3e-10	60.1	zma:100191189	protein phosphatase 2 (formerly 2A), catalytic subUnit [EC:3.1.3.16]	GO:0006950//response to stress;GO:0030522//intracellular receptor-mediated signaling pathway	GO:0004721//phosphoprotein phosphatase activity	GO:0043231//intracellular membrane-bounded organelle
	Unigene34018	7.65	2.5	1.63	3.41	1.79	0.88	1.8	3.29	2.25	5.91	208	10	3.6971	gi|225467658|ref|XP_002268555.1|	98.2	3e-20	PREDICTED: similar to H0102C09.1 [Vitis vinifera]	sp|P10978|POLX_TOBAC	65.9	7e-11	Retrovirus-related Pol polyprotein from transposon TNT 1-94 OS=Nicotiana tabacum PE=2 SV=1	--	--	--	--	--	--	--	--	--	--	GO:0006260//DNA replication	GO:0046914//transition metal ion binding;GO:0003676//nucleic acid binding;GO:0034061	GO:0031224//intrinsic to membrane
	Unigene34262	13.71	0	0.81	0.85	4.45	2.64	0	0	3.08	7.35	209	5	1.8397	gi|28273096|dbj|BAC56914.1|	116	7e-26	nitrate transporter [Nicotiana tabacum]	sp|Q05085|CHL1_ARATH	99.8	5e-21	Nitrate/chlorate transporter OS=Arabidopsis thaliana GN=CHL1 PE=1 SV=1	ECU11g1050	49.3	2e-06	COG3104	Dipeptide/tripeptide permease	K03305	5e-17	82.4	rcu:RCOM_0776160	proton-dependent oligopeptide transporter, POT family	GO:0015833//peptide transport	-	GO:0031224//intrinsic to membrane;GO:0031410//cytoplasmic vesicle
	Unigene34513	10.61	4.13	1.62	3.38	1.77	0	0.89	1.63	2.57	6.17	210	2	0.7324	gi|145839451|gb|ABP96804.1|	62.4	2e-09	receptor-like protein kinase [Capsicum annuum]	--	--	--	--	--	--	--	--	--	--	--	--	--	--	GO:0006464//protein modification process	GO:0004871//signal transducer activity;GO:0004713//protein tyrosine kinase activity;GO:0032559//adenyl ribonucleotide binding	-
	Unigene34790	27.16	0	0	0	0	0	3.54	2.44	7.67	17.62	211	4	1.4578	gi|224065557|ref|XP_002301856.1|	90.5	5e-18	cellulose synthase [Populus trichocarpa] >gi|222843582|gb|EEE81129.1| cellulose synthase [Populus trichocarpa]	sp|Q84JA6|CESA4_ARATH	88.2	1e-17	Cellulose synthase A catalytic subUnit 4 [UDP-forming] OS=Arabidopsis thaliana GN=CESA4 PE=1 SV=1	--	--	--	--	--	K10999	2e-19	90.9	rcu:RCOM_0542950	cellulose synthase A [EC:2.4.1.12]	GO:0006952//defense response;GO:0000160//two-component signal transduction system (phosphorelay);GO:0045229//external encapsulating structure organization;GO:0009250//glucan biosynthetic process;GO:0042545//cell wall modification;GO:0009832//plant-type cell wall biogenesis	GO:0016759//cellulose synthase activity;GO:0046914//transition metal ion binding	GO:0031224//intrinsic to membrane
	Unigene35659	9.58	0	0	0	3.45	2.55	0	0	2.78	5.87	216	11	3.9161	gi|48675345|dbj|BAD22820.1|	91.3	3e-18	nitrate transporter [Prunus persica]	sp|Q05085|CHL1_ARATH	70.5	3e-12	Nitrate/chlorate transporter OS=Arabidopsis thaliana GN=CHL1 PE=1 SV=1	--	--	--	--	--	K03305	3e-08	53.5	ppp:PHYPADRAFT_189464	proton-dependent oligopeptide transporter, POT family	GO:0015833//peptide transport	-	GO:0031224//intrinsic to membrane
	Unigene35844	30.81	0.8	1.57	0	2.57	11.01	9.47	4.74	2.8	6.1	217	8	2.835	gi|284519838|gb|ADB92669.1|	106	7e-23	cationic amino acid transporter 5 [Populus tremula x Populus alba]	--	--	--	--	--	--	--	--	--	--	--	--	--	--	GO:0015837//amine transport	GO:0015171//amino acid transmembrane transporter activity	GO:0043227//membrane-bounded organelle;GO:0031224//intrinsic to membrane
	Unigene36253	18.9	0.79	3.88	2.43	1.7	0	1.71	0	4.87	12.52	219	17	5.9693	gi|224090009|ref|XP_002308905.1|	127	3e-29	BOP/NPR1/NIM1-like regulatory protein [Populus trichocarpa] >gi|222854881|gb|EEE92428.1| BOP/NPR1/NIM1-like regulatory protein [Populus trichocarpa]	--	--	--	--	--	--	--	--	--	--	--	--	--	--	GO:0009943//adaxial/abaxial axis specification;GO:0010073//meristem maintenance;GO:0003006//reproductive developmental process;GO:0010557//positive regulation of macromolecule biosynthetic process	GO:0005488//binding	GO:0043231//intracellular membrane-bounded organelle
	Unigene37176	46.91	0	0	0.79	2.49	4.92	9.18	0	5.11	12.81	224	17	5.8361	gi|30693663|ref|NP_851109.1|	104	3e-22	LHT1; amino acid transmembrane transporter [Arabidopsis thaliana] >gi|75262627|sp|Q9FKS8.1|LHT1_ARATH RecName: Full=Lysine histidine transporter 1 >gi|14194151|gb|AAK56270.1|AF367281_1 AT5g40780/K1B16_3 [Arabidopsis thaliana] >gi|10177957|dbj|BAB11340.1| amino acid permease [Arabidopsis thaliana] >gi|22137070|gb|AAM91380.1| At5g40780/K1B16_3 [Arabidopsis thaliana]	sp|Q9C733|LHTL1_ARATH	104	2e-22	Lysine histidine transporter-like 1 OS=Arabidopsis thaliana GN=At1g48640 PE=3 SV=2	--	--	--	--	--	--	--	--	--	--	GO:0006865//amino acid transport	GO:0015171//amino acid transmembrane transporter activity	GO:0031224//intrinsic to membrane
	Unigene37199	375.26	86.65	122.07	147.14	67.32	152.64	33.37	0.76	2.46	5.01	224	232	79.6453	gi|270342117|gb|ACZ74700.1|	82.8	1e-15	quinone oxidoreductase-like protein [Phaseolus vulgaris]	sp|Q9ZUC1|QORL_ARATH	73.2	5e-13	Quinone oxidoreductase-like protein At1g23740, chloroplastic OS=Arabidopsis thaliana GN=At1g23740 PE=1 SV=2	--	--	--	--	--	--	--	--	--	--	GO:0008152//metabolic process	GO:0016491//oxidoreductase activity;GO:0046914//transition metal ion binding	-
	Unigene37961	16.06	0.76	5.96	5.44	0	3.23	7.38	0	2.18	4.17	228	7	2.3609	gi|9558588|gb|AAF88151.1|AC026234_2	116	9e-26	Contains similarity to a rPOP protein from Rattus norvegicus gi|3043760 and is a member of the prolyl oligopeptidase family PF|00326. ESTs gb|AA651190, gb|H36145 come from this gene [Arabidopsis thaliana]	sp|Q9QUR6|PPCE_MOUSE	82	1e-15	Prolyl endopeptidase OS=Mus musculus GN=Prep PE=2 SV=1	--	--	--	--	--	K01322	3e-27	116	ath:AT1G20380	prolyl oligopeptidase [EC:3.4.21.26]	GO:0019538//protein metabolic process	GO:0004175//endopeptidase activity	GO:0009536//plastid
	Unigene3828	14.76	0.38	0.37	0	1.23	1.62	3.3	0.76	4.47	12.22	453	17	2.8858	gi|217074834|gb|ACJ85777.1|	77.8	5e-28	unknown [Medicago truncatula]	--	--	--	--	--	--	--	--	--	--	--	--	--	--	GO:0016192//vesicle-mediated transport	-	GO:0043234//protein complex
	Unigene38538	5.51	0	0	0	0	2.39	1.62	0	2.31	4.93	231	3	0.9987	gi|115480315|ref|NP_001063751.1|	98.2	3e-20	Os09g0530800 [Oryza sativa Japonica Group] >gi|113631984|dbj|BAF25665.1| Os09g0530800 [Oryza sativa Japonica Group]	sp|Q39547|CUCM1_CUCME	86.7	4e-17	Cucumisin OS=Cucumis melo PE=1 SV=1	--	--	--	--	--	K01342	3e-17	83.2	osa:4334194	subtilisin [EC:3.4.21.62]	GO:0019538//protein metabolic process;GO:0044092	GO:0004175//endopeptidase activity;GO:0005515//protein binding	GO:0031410//cytoplasmic vesicle
	Unigene38723	441.92	120.26	180.08	220.74	155.69	208.39	50.75	2.95	2	3.77	232	335	111.039	gi|1184121|gb|AAA87182.1|	71.6	3e-12	auxin-induced protein [Vigna radiata]	sp|Q9ZUC1|QORL_ARATH	64.7	2e-10	Quinone oxidoreductase-like protein At1g23740, chloroplastic OS=Arabidopsis thaliana GN=At1g23740 PE=1 SV=2	--	--	--	--	--	--	--	--	--	--	GO:0006950//response to stress;GO:0008152//metabolic process	GO:0046914//transition metal ion binding;GO:0016655//oxidoreductase activity, acting on NADH or NADPH, quinone or similar compound as acceptor	GO:0009526//plastid envelope;GO:0009532//plastid stroma;GO:0005576//extracellular region
	Unigene3955	13.32	0	0	0	0	0	0.74	5.46	2.44	6.11	251	5	1.5319	gi|1706958|gb|AAB37767.1|	68.6	2e-24	cellulose synthase [Gossypium hirsutum]	sp|Q69V23|CESA3_ORYSJ	70.9	3e-24	Probable cellulose synthase A catalytic subUnit 3 [UDP-forming] OS=Oryza sativa subsp. japonica GN=CESA3 PE=2 SV=1	--	--	--	--	--	K10999	8e-26	68.6	vvi:100241197	cellulose synthase A [EC:2.4.1.12]	GO:0006952//defense response;GO:0000160//two-component signal transduction system (phosphorelay);GO:0045229//external encapsulating structure organization;GO:0009250//glucan biosynthetic process;GO:0042545//cell wall modification;GO:0009832//plant-type cell wall biogenesis	GO:0016759//cellulose synthase activity;GO:0046914//transition metal ion binding	GO:0031224//intrinsic to membrane
	Unigene4053	15.83	2.87	1.25	2.28	1.03	1.35	7.57	3.79	2.09	5.65	543	41	5.8064	gi|79499196|ref|NP_195518.2|	195	6e-62	transmembrane transporter [Arabidopsis thaliana] >gi|75128428|sp|Q6SZ87.1|NAT11_ARATH RecName: Full=Nucleobase-ascorbate transporter 11; Short=AtNAT11 >gi|38350521|gb|AAR18373.1| nucleobase-ascorbate transporter 11 [Arabidopsis thaliana]	sp|Q6SZ87|NAT11_ARATH	195	4e-62	Nucleobase-ascorbate transporter 11 OS=Arabidopsis thaliana GN=NAT11 PE=2 SV=1	PAB1838	57.4	8e-12	COG2233	Xanthine/uracil permeases	--	--	--	--	--	GO:0006810//transport	GO:0005215//transporter activity	GO:0016020//membrane
	Unigene4065	9.44	0	0	0	0	0	3.17	0	2.98	7.51	354	5	1.0861	gi|6002281|emb|CAB56742.1|	133	6e-46	cytochrome P450 monooxygenase [Cicer arietinum]	sp|P93147|C81E1_GLYEC	114	2e-33	Isoflavone 2'-hydroxylase OS=Glycyrrhiza echinata GN=CYP81E1 PE=1 SV=2	AGc2890	51.2	4e-07	COG2124	Cytochrome P450	K00517	6e-36	117	ath:AT4G37360	[EC:1.14.-.-]	GO:0008152//metabolic process	GO:0016712//oxidoreductase activity, acting on paired donors, with incorporation or reduction of molecular oxygen, reduced flavin or flavoprotein as one donor, and incorporation of one atom of oxygen;GO:0016709//oxidoreductase activity, acting on paired donors, with incorporation or reduction of molecular oxygen, NADH or NADPH as one donor, and incorporation of one atom of oxygen;GO:0005506//iron…	GO:0044464//cell part
	Unigene41270	96.43	0	0	0.72	0.76	18.68	32.67	0	2.95	6.82	246	74	23.1322	gi|13161403|dbj|BAB33036.1|	146	6e-35	CPRD49 [Vigna unguiculata]	sp|Q9SRM5|CPR49_ARATH	120	3e-27	GDSL esterase/lipase CPRD49 OS=Arabidopsis thaliana GN=CPRD49 PE=2 SV=1	--	--	--	--	--	--	--	--	--	--	GO:0044238//primary metabolic process	GO:0016787//hydrolase activity	-
	Unigene4281	58.12	18.34	10.33	9.38	0.99	0	2.97	1.36	3.17	7.68	378	30	6.1031	gi|165994488|dbj|BAF99694.1|	145	1e-44	1-O-acylglucose:anthocyanin-O-acyltransferase [Clitoria ternatea]	sp|Q9C7Z9|SCP18_ARATH	99	2e-27	Serine carboxypeptidase-like 18 OS=Arabidopsis thaliana GN=SCPL18 PE=2 SV=2	YBR139w	41.6	3e-06	COG2939	Carboxypeptidase C (cathepsin A)	K01289	2e-27	102	ath:AT5G09640	carboxypeptidase [EC:3.4.16.-]	GO:0019538//protein metabolic process	GO:0016747//transferase activity, transferring acyl groups other than amino-acyl groups;GO:0004180//carboxypeptidase activity	-
	Unigene43098	304.15	12.81	7.27	38.61	53.61	138.05	3.64	0.67	2.2	5.47	257	185	55.3552	gi|150022176|gb|ABR57416.1|	179	8e-45	alpha-expansin 3 [Gossypium arboreum] >gi|150022184|gb|ABR57420.1| alpha-expansin 3 [Gossypium hirsutum] >gi|150022186|gb|ABR57421.1| alpha-expansin 3 [Gossypium hirsutum] >gi|150022188|gb|ABR57422.1| alpha-expansin 3 [Gossypium mustelinum] >gi|150022190|gb|ABR57423.1| alpha-expansin 3 [Gossypium raimondii]	sp|O80622|EXP15_ARATH	159	5e-39	Expansin-A15 OS=Arabidopsis thaliana GN=EXPA15 PE=2 SV=2	--	--	--	--	--	--	--	--	--	--	GO:0007047//cell wall organization	-	GO:0044464//cell part
	Unigene43176	3.72	1.35	1.32	0.69	0.72	0	0	0	2.76	5.19	257	9	2.693	gi|224713823|gb|ACN62126.1|	65.9	1e-10	tryptophan decarboxylase [Capsicum annuum]	sp|Q8RY79|TYDC1_ARATH	63.9	3e-10	Tyrosine decarboxylase 1 OS=Arabidopsis thaliana GN=ELI5 PE=2 SV=1	--	--	--	--	--	K01593	3e-12	66.6	vvi:100251450	aromatic-L-amino-acid decarboxylase [EC:4.1.1.28]	GO:0006519//cellular amino acid and derivative metabolic process;GO:0006950//response to stress;GO:0043436	GO:0016831//carboxy-lyase activity;GO:0048037//cofactor binding	-
	Unigene43547	124.3	33.33	26.13	31.35	14.32	4.24	12.22	1.98	3.73	8.38	260	32	9.4645	gi|115484263|ref|NP_001065793.1|	74.7	3e-13	Os11g0156200 [Oryza sativa Japonica Group] >gi|62701876|gb|AAX92949.1| At2g24280/F27D4.19 [Oryza sativa Japonica Group] >gi|77548743|gb|ABA91540.1| Serine carboxypeptidase S28 family protein, expressed [Oryza sativa (japonica cultivar-group)] >gi|113644497|dbj|BAF27638.1| Os11g0156200 [Oryza sativa Japonica Group]	--	--	--	--	--	--	--	--	--	K01285	2e-11	63.9	osa:4341667	lysosomal Pro-X carboxypeptidase [EC:3.4.16.2]	GO:0019538//protein metabolic process	GO:0008238//exopeptidase activity	GO:0031410//cytoplasmic vesicle;GO:0000323//lytic vacuole
	Unigene43955	7.9	2.65	1.94	2.03	0.71	2.81	0	2.61	2.81	5.67	262	16	4.6961	gi|79324537|ref|NP_001031499.1|	126	8e-29	kinase [Arabidopsis thaliana] >gi|224589545|gb|ACN59306.1| leucine-rich repeat receptor-like protein kinase [Arabidopsis thaliana]	sp|C0LGI2|Y1677_ARATH	88.6	1e-17	Probable LRR receptor-like serine/threonine-protein kinase At1g67720 OS=Arabidopsis thaliana GN=At1g67720 PE=2 SV=1	--	--	--	--	--	--	--	--	--	--	GO:0006464//protein modification process	GO:0004702//receptor signaling protein serine/threonine kinase activity;GO:0032559//adenyl ribonucleotide binding	GO:0016020//membrane;GO:0031410//cytoplasmic vesicle
	Unigene44935	27.82	0	0	2.63	2.08	3.42	5.56	0	5	12.18	269	25	7.1467	gi|164605527|dbj|BAF98593.1|	99.4	1e-20	CM0216.590.nc [Lotus japonicus]	sp|Q8RX80|CRK18_ARATH	79.3	7e-15	Cysteine-rich receptor-like protein kinase 18 OS=Arabidopsis thaliana GN=CRK18 PE=2 SV=2	--	--	--	--	--	K13416	1e-09	57.8	rcu:RCOM_1534760	brassinosteroid insensitive 1-associated receptor kinase 1 [EC:2.7.10.1 2.7.11.1]	GO:0006464//protein modification process;GO:0008037//cell recognition	GO:0030246//carbohydrate binding;GO:0004702//receptor signaling protein serine/threonine kinase activity;GO:0004713//protein tyrosine kinase activity;GO:0032559//adenyl ribonucleotide binding	GO:0031410//cytoplasmic vesicle
	Unigene45303	29.26	3.19	5	4.56	6.84	3.38	10.99	3.78	2.66	8.64	272	17	4.8062	gi|224107853|ref|XP_002314626.1|	137	4e-32	aminophospholipid ATPase [Populus trichocarpa] >gi|222863666|gb|EEF00797.1| aminophospholipid ATPase [Populus trichocarpa]	sp|Q9XIE6|ALA3_ARATH	129	7e-30	Phospholipid-transporting ATPase 3 OS=Arabidopsis thaliana GN=ALA3 PE=1 SV=2	--	--	--	--	--	K01530	1e-33	137	pop:POPTR_230718	phospholipid-translocating ATPase [EC:3.6.3.1]	GO:0009206;GO:0006869//lipid transport;GO:0006900//membrane budding;GO:0048513//organ development	GO:0042625//ATPase activity, coupled to transmembrane movement of ions;GO:0046872//metal ion binding;GO:0005548//phospholipid transporter activity;GO:0032559//adenyl ribonucleotide binding	GO:0031224//intrinsic to membrane;GO:0043231//intracellular membrane-bounded organelle
	Unigene48792	20.7	8.67	3.4	7.09	0.62	4.9	6.23	7.42	2.39	5.54	300	14	3.5886	gi|76880152|dbj|BAE45851.1|	185	1e-46	DNA polymerase [Nicotiana tabacum]	--	--	--	--	--	--	--	--	--	K02335	9e-46	177	pop:POPTR_1097327	DNA polymerase I [EC:2.7.7.7]	GO:0006259//DNA metabolic process	GO:0004527//exonuclease activity;GO:0003676//nucleic acid binding;GO:0034061	GO:0043232;GO:0009536//plastid
	Unigene48848	13.22	0.58	0	0	0	0	1.24	5.69	2.32	5.81	301	10	2.5548	gi|297821617|ref|XP_002878691.1|	177	3e-44	GDSL-motif lipase/hydrolase family protein [Arabidopsis lyrata subsp. lyrata] >gi|297324530|gb|EFH54950.1| GDSL-motif lipase/hydrolase family protein [Arabidopsis lyrata subsp. lyrata]	sp|O80470|GDL38_ARATH	172	4e-43	GDSL esterase/lipase At2g23540 OS=Arabidopsis thaliana GN=At2g23540 PE=2 SV=1	--	--	--	--	--	--	--	--	--	--	GO:0044238//primary metabolic process	GO:0016787//hydrolase activity	GO:0031410//cytoplasmic vesicle
	Unigene48958	21.09	2.87	3.37	4.69	2.47	1.22	3.09	2.27	4.49	17.02	302	14	3.5648	gi|224107853|ref|XP_002314626.1|	176	7e-44	aminophospholipid ATPase [Populus trichocarpa] >gi|222863666|gb|EEF00797.1| aminophospholipid ATPase [Populus trichocarpa]	sp|Q9XIE6|ALA3_ARATH	161	1e-39	Phospholipid-transporting ATPase 3 OS=Arabidopsis thaliana GN=ALA3 PE=1 SV=2	YAL026c	109	1e-24	COG0474	Cation transport ATPase	K01530	3e-45	176	pop:POPTR_230718	phospholipid-translocating ATPase [EC:3.6.3.1]	GO:0009206;GO:0006869//lipid transport;GO:0006900//membrane budding;GO:0048513//organ development;GO:0006464//protein modification process	GO:0042625//ATPase activity, coupled to transmembrane movement of ions;GO:0004672//protein kinase activity;GO:0046872//metal ion binding;GO:0005548//phospholipid transporter activity;GO:0032559//adenyl ribonucleotide binding	GO:0031224//intrinsic to membrane;GO:0043231//intracellular membrane-bounded organelle
	Unigene48982	29.52	9.18	5.62	8.21	1.85	4.26	5.57	2.27	3.22	8.76	302	37	9.4214	gi|21554183|gb|AAM63262.1|	166	6e-41	enhanced disease susceptibility 5 [Arabidopsis thaliana]	sp|Q945F0|EDS5_ARATH	161	1e-39	Enhanced disease susceptibility 5 OS=Arabidopsis thaliana GN=EDS5 PE=2 SV=1	SMc02244	47	8e-06	COG0534	Na+-driven multidrug efflux pump	--	--	--	--	--	GO:0015893//drug transport;GO:0006952//defense response;GO:0051707//response to other organism;GO:0009696//salicylic acid metabolic process	GO:0015291//secondary active transmembrane transporter activity	GO:0009536//plastid
	Unigene49269	135.71	48.87	42.88	33.12	29.91	19.29	14.09	37.06	2.78	8.38	305	162	40.8447	gi|15238459|ref|NP_200762.1|	134	3e-31	oxidoreductase, 2OG-Fe(II) oxygenase family protein [Arabidopsis thaliana] >gi|15983483|gb|AAL11609.1|AF424616_1 AT5g59540/f2o15_200 [Arabidopsis thaliana] >gi|8885558|dbj|BAA97488.1| leucoanthocyanidin dioxygenase-like protein [Arabidopsis thaliana] >gi|90093306|gb|ABD85166.1| At5g59540 [Arabidopsis thaliana] >gi|110740561|dbj|BAE98386.1| 1-aminocyclopropane-1-carboxylate oxidase - like protein …	sp|Q84MB3|ACCH1_ARATH	125	8e-29	1-aminocyclopropane-1-carboxylate oxidase homolog 1 OS=Arabidopsis thaliana GN=At1g06620 PE=2 SV=1	PA0147	57	8e-09	COG3491	Isopenicillin N synthase and related dioxygenases	K13229	1e-17	84.3	zma:541977	2-oxoglutarate-dependent dioxygenase [EC:1.14.11.-]	GO:0008152//metabolic process	GO:0046914//transition metal ion binding;GO:0016706//oxidoreductase activity, acting on paired donors, with incorporation or reduction of molecular oxygen, 2-oxoglutarate as one donor, and incorporation of one atom each of oxygen into both donors	-
	Unigene49316	59.5	0	0	0	0	0	18.99	22.46	2.65	5.27	305	33	8.3202	gi|17226294|gb|AAL37718.1|AF413210_1	87.4	4e-17	cellulose synthase A4 [Gossypium hirsutum]	sp|Q8LPK5|CESA8_ARATH	83.2	5e-16	Cellulose synthase A catalytic subUnit 8 [UDP-forming] OS=Arabidopsis thaliana GN=CESA8 PE=1 SV=1	--	--	--	--	--	K10999	3e-17	83.2	ath:AT4G18780	cellulose synthase A [EC:2.4.1.12]	GO:0009688//abscisic acid biosynthetic process;GO:0009250//glucan biosynthetic process;GO:0009832//plant-type cell wall biogenesis;GO:0006952//defense response;GO:0042545//cell wall modification;GO:0000160//two-component signal transduction system (phosphorelay)	GO:0016759//cellulose synthase activity	GO:0016020//membrane;GO:0030312//external encapsulating structure
	Unigene49435	14.52	0	1.66	0	0	1.2	1.22	1.67	8.68	17.32	307	31	7.765	gi|224055771|ref|XP_002298645.1|	185	1e-46	hydroxycinnamoyl CoA shikimate/quinate hydroxycinnamoyltransferase-like protein [Populus trichocarpa] >gi|222845903|gb|EEE83450.1| hydroxycinnamoyl CoA shikimate/quinate hydroxycinnamoyltransferase-like protein [Populus trichocarpa]	sp|Q94CD1|HHT1_ARATH	174	1e-43	Omega-hydroxypalmitate O-feruloyl transferase OS=Arabidopsis thaliana GN=HHT1 PE=1 SV=1	--	--	--	--	--	K13065	1e-17	84.3	pop:POPTR_554899	shikimate O-hydroxycinnamoyltransferase [EC:2.3.1.133]	GO:0045489//pectin biosynthetic process;GO:0006631//fatty acid metabolic process	GO:0008415//acyltransferase activity	-
	Unigene49662	59.25	1.68	1.65	1.15	2.41	0	8.47	8.31	7	15.97	309	13	3.2352	gi|115462671|ref|NP_001054935.1|	122	1e-27	Os05g0215800 [Oryza sativa Japonica Group] >gi|113578486|dbj|BAF16849.1| Os05g0215800 [Oryza sativa Japonica Group]	--	--	--	--	--	--	--	--	--	--	--	--	--	--	GO:0008643//carbohydrate transport	GO:0015144//carbohydrate transmembrane transporter activity;GO:0003676//nucleic acid binding;GO:0005515//protein binding	GO:0031224//intrinsic to membrane
	Unigene50229	7.61	2.76	1.62	0.56	0	0	0.6	2.73	2.76	5.37	314	6	1.4694	gi|225432842|ref|XP_002279912.1|	77.8	4e-14	PREDICTED: similar to polyprotein [Vitis vinifera]	--	--	--	--	--	--	--	--	--	--	--	--	--	--	GO:0044260;GO:0019538//protein metabolic process	GO:0005488//binding;GO:0003824//catalytic activity	GO:0044424//intracellular part
	Unigene50610	52.57	0	0	0.56	0	0.58	17.04	20.47	2.57	5.17	318	34	8.2219	gi|67003907|gb|AAY60843.1|	110	6e-24	cellulose synthase 1 [Eucalyptus grandis] >gi|162955784|gb|ABY25276.1| cellulose synthase [Eucalyptus grandis] >gi|162955790|gb|ABY25279.1| cellulose synthase [Eucalyptus grandis]	sp|Q8LPK5|CESA8_ARATH	90.5	3e-18	Cellulose synthase A catalytic subUnit 8 [UDP-forming] OS=Arabidopsis thaliana GN=CESA8 PE=1 SV=1	--	--	--	--	--	K10999	4e-24	106	vvi:100261696	cellulose synthase A [EC:2.4.1.12]	GO:0009987//cellular process	GO:0016757//transferase activity, transferring glycosyl groups	GO:0016020//membrane
	Unigene50656	332.87	57.59	35.67	37.22	33.85	3.46	48.62	54.77	5.78	16.15	319	68	16.3922	gi|84514151|gb|ABC59084.1|	63.9	5e-10	cytochrome P450 monooxygenase CYP83G1 [Medicago truncatula]	sp|Q9LIP5|C71BW_ARATH	51.2	2e-06	Cytochrome P450 71B35 OS=Arabidopsis thaliana GN=CYP71B35 PE=2 SV=1	--	--	--	--	--	K00517	1e-07	51.2	ath:AT3G26310	[EC:1.14.-.-]	GO:0008152//metabolic process	GO:0005506//iron ion binding;GO:0004497//monooxygenase activity	-
	Unigene51577	415.66	72.69	37.68	42.55	29.99	64.26	139.16	0	2.99	8.2	329	406	94.8965	gi|222422901|dbj|BAH19437.1|	109	8e-24	AT4G08870 [Arabidopsis thaliana]	sp|Q9ZPF5|ARGI2_ARATH	109	5e-24	Probable arginase OS=Arabidopsis thaliana GN=At4g08870 PE=1 SV=1	--	--	--	--	--	K01476	2e-25	110	vvi:100245397	arginase [EC:3.5.3.1]	GO:0006952//defense response;GO:0009446//putrescine biosynthetic process;GO:0006525//arginine metabolic process	GO:0016813//hydrolase activity, acting on carbon-nitrogen (but not peptide) bonds, in linear amidines;GO:0046914//transition metal ion binding	GO:0009536//plastid
	Unigene52526	14.98	5.1	2.5	1.56	1.1	0	0.55	0	2.94	7.46	340	13	2.9403	gi|124014020|gb|ABM88259.1|	138	2e-32	lipoxygenase [Phaseolus vulgaris]	sp|Q8GSM2|LOX23_HORVU	117	3e-26	Lipoxygenase 2.3, chloroplastic OS=Hordeum vulgare GN=LOX2.3 PE=1 SV=1	--	--	--	--	--	K00454	1e-28	120	osa:4328603	lipoxygenase [EC:1.13.11.12]	GO:0006633//fatty acid biosynthetic process	GO:0046914//transition metal ion binding;GO:0016702//oxidoreductase activity, acting on single donors with incorporation of molecular oxygen, incorporation of two atoms of oxygen	GO:0043231//intracellular membrane-bounded organelle
	Unigene52960	193.25	48.08	43.69	49.68	37.67	69.6	69.13	55.94	2.78	11.42	346	193	42.8945	gi|297799002|ref|XP_002867385.1|	232	1e-60	methionine over-accumulator [Arabidopsis lyrata subsp. lyrata] >gi|297313221|gb|EFH43644.1| methionine over-accumulator [Arabidopsis lyrata subsp. lyrata]	sp|Q9S7B5|THRC1_ARATH	232	6e-61	Threonine synthase 1, chloroplastic OS=Arabidopsis thaliana GN=TS1 PE=1 SV=1	MJ1465	62.4	2e-10	COG0498	Threonine synthase	K01733	4e-62	232	ath:AT4G29840	threonine synthase [EC:4.2.3.1]	GO:0006566//threonine metabolic process	GO:0016838//carbon-oxygen lyase activity, acting on phosphates;GO:0048037//cofactor binding	GO:0009536//plastid
	Unigene53138	38.43	6.47	4.39	16.8	7.49	3.7	17.18	2.46	2.24	4.9	348	25	5.5243	gi|34850945|dbj|BAC87845.1|	179	7e-45	leucine-rich repeat receptor-like protein kinase 1 [Populus nigra]	sp|Q8VZG8|Y4885_ARATH	168	8e-42	Probable LRR receptor-like serine/threonine-protein kinase At4g08850 OS=Arabidopsis thaliana GN=At4g08850 PE=1 SV=3	CAC0404_1	80.5	7e-16	COG0515	Serine/threonine protein kinase	K13415	3e-32	133	sbi:SORBI_03g012040	protein brassinosteroid insensitive 1 [EC:2.7.10.1 2.7.11.1]	GO:0006464//protein modification process	GO:0004702//receptor signaling protein serine/threonine kinase activity;GO:0016628//oxidoreductase activity, acting on the CH-CH group of donors, NAD or NADP as acceptor;GO:0032559//adenyl ribonucleotide binding	GO:0031224//intrinsic to membrane
	Unigene53217	12.77	0	0	0	0	0.53	2.68	4.91	2.6	6.05	349	20	4.4068	gi|224134056|ref|XP_002321725.1|	142	9e-34	hydroxycinnamoyl CoA shikimate/quinate hydroxycinnamoyltransferase-like protein [Populus trichocarpa] >gi|222868721|gb|EEF05852.1| hydroxycinnamoyl CoA shikimate/quinate hydroxycinnamoyltransferase-like protein [Populus trichocarpa] >gi|267799523|gb|ACY79409.1| omega-hydroxyacid hydroxycinnamoyltransferase [Populus trichocarpa]	sp|Q94CD1|HHT1_ARATH	129	6e-30	Omega-hydroxypalmitate O-feruloyl transferase OS=Arabidopsis thaliana GN=HHT1 PE=1 SV=1	--	--	--	--	--	K13065	5e-08	52.8	pop:POPTR_554899	shikimate O-hydroxycinnamoyltransferase [EC:2.3.1.133]	GO:0045489//pectin biosynthetic process;GO:0006631//fatty acid metabolic process	GO:0008415//acyltransferase activity	-
	Unigene53569	120.97	24.48	12.95	7.01	0.53	17.66	46.98	58.06	2.08	4.58	354	222	48.2247	gi|33636088|emb|CAD91337.1|	172	1e-42	sorbitol-like transporter [Glycine max]	sp|Q8VZ80|PLT5_ARATH	140	3e-33	Polyol transporter 5 OS=Arabidopsis thaliana GN=PLT5 PE=1 SV=2	--	--	--	--	--	--	--	--	--	--	GO:0008152//metabolic process;GO:0006810//transport	GO:0016628//oxidoreductase activity, acting on the CH-CH group of donors, NAD or NADP as acceptor;GO:0022857//transmembrane transporter activity	GO:0031224//intrinsic to membrane
	Unigene53580	203.27	35.25	35.02	48.56	34.71	70.62	42.76	53.22	2.88	11.97	354	208	45.1835	gi|45550058|gb|AAS67875.1|	224	2e-58	chloroplast threonine synthase [Medicago sativa]	sp|Q9MT28|THRC_SOLTU	221	1e-57	Threonine synthase, chloroplastic OS=Solanum tuberosum PE=2 SV=1	TM0546	100	5e-22	COG0498	Threonine synthase	K01733	9e-60	224	vvi:100257746	threonine synthase [EC:4.2.3.1]	GO:0006566//threonine metabolic process	GO:0016838//carbon-oxygen lyase activity, acting on phosphates;GO:0048037//cofactor binding	GO:0009536//plastid
	Unigene54295	653.42	43.8	48.52	38.46	36.83	299.48	303.41	13.65	2.15	4.17	364	524	110.701	gi|22711923|ref|NP_683792.1|	146	6e-35	cytochrome b6 [Chaetosphaeridium globosum] >gi|29839362|sp|Q8M9Z4.1|CYB6_CHAGL RecName: Full=Cytochrome b6 >gi|22416927|gb|AAM96527.1| apocytochrome b6 of cytochrome b6/f complex [Chaetosphaeridium globosum]	sp|Q8M9Z4|CYB6_CHAGL	146	3e-35	Cytochrome b6 OS=Chaetosphaeridium globosum GN=petB PE=3 SV=1	alr3421	125	2e-29	COG1290	Cytochrome b subUnit of the bc complex	K02635	8e-36	145	osa:3131403	cytochrome b6	GO:0051234//establishment of localization;GO:0022900//electron transport chain	GO:0043169//cation binding;GO:0003824//catalytic activity	GO:0031224//intrinsic to membrane;GO:0009534//chloroplast thylakoid
	Unigene54532	122	19.78	19.38	17.33	5.06	38.46	28.95	10.71	3.17	9.2	368	143	29.8819	gi|10177044|dbj|BAB10456.1|	206	7e-53	RNA helicase [Arabidopsis thaliana]	sp|Q9FFQ1|RH31_ARATH	206	4e-53	DEAD-box ATP-dependent RNA helicase 31 OS=Arabidopsis thaliana GN=RH31 PE=2 SV=2	SPAC1F7.02c	85.5	2e-17	COG0513	Superfamily II DNA and RNA helicases	K13179	1e-19	91.7	vvi:100242258	ATP-dependent RNA helicase DDX18 [EC:3.6.4.13]	GO:0006970//response to osmotic stress	GO:0003676//nucleic acid binding;GO:0042623//ATPase activity, coupled;GO:0032559//adenyl ribonucleotide binding	GO:0043231//intracellular membrane-bounded organelle
	Unigene54640	10.79	2.82	4.6	1.44	0.5	3.99	5.06	1.39	2.13	4.49	369	27	5.6267	gi|297844454|ref|XP_002890108.1|	171	3e-42	pentatricopeptide repeat-containing protein [Arabidopsis lyrata subsp. lyrata] >gi|297335950|gb|EFH66367.1| pentatricopeptide repeat-containing protein [Arabidopsis lyrata subsp. lyrata]	sp|Q9M9E2|PPR45_ARATH	166	5e-41	Pentatricopeptide repeat-containing protein At1g15510, chloroplastic OS=Arabidopsis thaliana GN=PCMP-H73 PE=2 SV=1	--	--	--	--	--	K03798	1e-09	58.5	rcu:RCOM_0340700	cell division protease FtsH [EC:3.4.24.-]	GO:0006397//mRNA processing	-	-
	Unigene54660	23.66	8.43	10.1	6.7	7.04	3.48	10.61	6.48	2.23	6.64	370	38	7.8977	gi|224136918|ref|XP_002322448.1|	116	9e-26	f-box family protein [Populus trichocarpa] >gi|222869444|gb|EEF06575.1| f-box family protein [Populus trichocarpa]	sp|Q9LEX0|P2A13_ARATH	103	4e-22	F-box protein PP2-A13 OS=Arabidopsis thaliana GN=PP2A13 PE=1 SV=1	--	--	--	--	--	--	--	--	--	--	GO:0006950//response to stress	GO:0005488//binding	-
	Unigene55596	5.39	0.45	0.44	0	1.45	1.91	1.95	1.78	2.77	5.19	384	21	4.2054	gi|224140225|ref|XP_002323485.1|	112	1e-24	multidrug/pheromone exporter, MDR family, ABC transporter family [Populus trichocarpa] >gi|222868115|gb|EEF05246.1| multidrug/pheromone exporter, MDR family, ABC transporter family [Populus trichocarpa]	sp|Q9ZR72|AB1B_ARATH	106	4e-23	ABC transporter B family member 1 OS=Arabidopsis thaliana GN=ABCB1 PE=1 SV=1	SPCC663.03	60.8	6e-10	COG1132	ABC-type multidrug transport system, ATPase and permease components	K05658	5e-13	69.7	vvi:100244232	ATP-binding cassette, subfamily B (MDR/TAP), member 1	GO:0051707//response to other organism;GO:0048437//floral organ development;GO:0009725//response to hormone stimulus;GO:0043479;GO:0032535;GO:0009630//gravitropism;GO:0009639//response to red or far red light	GO:0042626//ATPase activity, coupled to transmembrane movement of substances;GO:0022891//substrate-specific transmembrane transporter activity;GO:0015562//efflux transmembrane transporter activity;GO:0005515//protein binding;GO:0032559//adenyl ribonucleotide binding	GO:0031224//intrinsic to membrane;GO:0043231//intracellular membrane-bounded organelle
	Unigene567	57.1	3.77	6	2.89	3.04	1.5	5.08	0.93	9.52	29.64	368	15	3.1345	gi|297795599|ref|XP_002865684.1|	70.9	8e-21	male sterility MS5 family protein [Arabidopsis lyrata subsp. lyrata] >gi|297311519|gb|EFH41943.1| male sterility MS5 family protein [Arabidopsis lyrata subsp. lyrata]	--	--	--	--	--	--	--	--	--	--	--	--	--	--	GO:0009267//cellular response to starvation;GO:0006791//sulfur utilization	-	-
	Unigene57051	66.79	10.57	7.46	19.88	14.99	27.8	0.46	10.03	2.4	6.05	410	119	22.3194	gi|28950747|gb|AAO63297.1|	150	5e-36	At2g45360 [Arabidopsis thaliana]	--	--	--	--	--	--	--	--	--	--	--	--	--	--	GO:0019941//modification-dependent protein catabolic process	GO:0019899//enzyme binding	GO:0000151//ubiquitin ligase complex
	Unigene57258	379.54	108	59.07	85.6	48.57	0.89	0	0	3.51	7.59	414	319	59.253	gi|18252655|gb|AAL66379.1|AF461740_1	153	6e-37	MADS-box transcription factor MADS4 [Pisum sativum] >gi|13446154|emb|CAC35027.1| MADS-box transcription factor [Pisum sativum] >gi|13661024|emb|CAC37031.1| MADS-box transcription factor [Pisum sativum]	sp|Q41276|AP1_SINAL	79.7	5e-15	Floral homeotic protein APETALA 1 OS=Sinapis alba GN=AP1 PE=2 SV=1	--	--	--	--	--	K09264	3e-14	73.9	ath:AT1G69120	MADS-box transcription factor, plant	GO:0010468//regulation of gene expression;GO:0006351//transcription, DNA-dependent	GO:0016491//oxidoreductase activity;GO:0003677//DNA binding	GO:0043231//intracellular membrane-bounded organelle
	Unigene57281	25	2.93	4.51	9.42	0.9	0	1.81	8.69	2.65	5.63	414	28	5.2009	gi|18419825|ref|NP_568002.1|	172	8e-43	ROT3 (ROTUNDIFOLIA 3); oxidoreductase, acting on paired donors, with incorporation or reduction of molecular oxygen, NADH or NADPH as one donor, and incorporation of one atom of oxygen / oxygen binding / steroid hydroxylase [Arabidopsis thaliana] >gi|150421525|sp|Q9M066.3|C90C1_ARATH RecName: Full=3-epi-6-deoxocathasterone 23-monooxygenase; AltName: Full=Cytochrome P450 90C1; AltName: Full=Protei…	sp|Q9M066|C90C1_ARATH	172	4e-43	Cytochrome P450 90C1 OS=Arabidopsis thaliana GN=ROT3 PE=2 SV=3	--	--	--	--	--	K12637	5e-44	172	ath:AT4G36380	cytochrome P450, family 90, subfamily C, polypeptide 1 [EC:1.14.-.-]	GO:0048827//phyllome development;GO:0048437//floral organ development;GO:0016129;GO:0048878//chemical homeostasis;GO:0006091//generation of precursor metabolites and energy;GO:0009887//organ morphogenesis;GO:0009826//Unidimensional cell growth	GO:0004497//monooxygenase activity;GO:0005506//iron ion binding	-
	Unigene57374	177.19	77.9	59.2	56.65	85.03	19.44	20.66	39.94	2.08	4.87	416	263	48.6164	gi|255542572|ref|XP_002512349.1|	71.6	2e-12	chloroplast-targeted copper chaperone, putative [Ricinus commUnis] >gi|223548310|gb|EEF49801.1| chloroplast-targeted copper chaperone, putative [Ricinus commUnis]	--	--	--	--	--	--	--	--	--	--	--	--	--	--	GO:0006812//cation transport	GO:0043169//cation binding	-
	Unigene5899	20.25	1.96	2.96	6.91	10.12	2.26	4.02	6.32	2	5.13	975	174	13.7235	gi|225431419|ref|XP_002279961.1|	253	3e-66	PREDICTED: similar to HB2 homeodomain protein isoform 2 [Vitis vinifera]	sp|Q5QMM3|WOX8_ORYSJ	230	1e-59	WUSCHEL-related homeobox 8 OS=Oryza sativa subsp. japonica GN=WOX8 PE=2 SV=1	--	--	--	--	--	--	--	--	--	--	GO:0010468//regulation of gene expression;GO:0006351//transcription, DNA-dependent	GO:0003677//DNA binding	GO:0043231//intracellular membrane-bounded organelle
	Unigene5989	17.21	2.88	3	0.55	1.16	5.92	3.3	6.05	2.84	6.59	962	104	8.3134	gi|551167|gb|AAA21761.1|	351	7e-96	moesin actin-binding domain homologue [Arabidopsis thaliana]	sp|Q75JC9|Y8484_DICDI	65.1	7e-10	Uncharacterized protein DDB_G0271670 OS=Dictyostelium discoideum GN=DDB_G0271670 PE=4 SV=1	--	--	--	--	--	--	--	--	--	--	GO:0009887//organ morphogenesis;GO:0009657//plastid organization;GO:0006397//mRNA processing;GO:0016109	-	GO:0009536//plastid
	Unigene60036	15.21	4.05	6.49	3.39	2.37	3.9	5.95	7.27	2.09	5.78	471	62	10.1226	gi|14149112|dbj|BAB55653.1|	92.8	1e-18	bg55 [Bruguiera gymnorhiza]	sp|Q9C7G1|PUB45_ARATH	73.2	6e-13	U-box domain-containing protein 45 OS=Arabidopsis thaliana GN=PUB45 PE=2 SV=1	--	--	--	--	--	--	--	--	--	--	GO:0032446//protein modification by small protein conjugation	GO:0005488//binding;GO:0019787//small conjugating protein ligase activity	-
	Unigene60359	162.86	39.8	36.17	34.03	23.71	33	46.04	23.24	3.54	15.72	479	326	52.3362	gi|1730560|sp|P53537.1|PHSH_VICFA	214	2e-55	RecName: Full=Alpha-glucan phosphorylase, H isozyme; AltName: Full=Starch phosphorylase H >gi|510932|emb|CAA84494.1| alpha 1,4-glucan phosphorylase type H [Vicia faba var. minor]	sp|P53537|PHSH_VICFA	214	1e-55	Alpha-glucan phosphorylase, H isozyme OS=Vicia faba PE=2 SV=1	sll1356	81.3	7e-16	COG0058	Glucan phosphorylase	K00688	3e-52	200	pop:POPTR_821505	starch phosphorylase [EC:2.4.1.1]	GO:0006950//response to stress;GO:0044238//primary metabolic process;GO:0010038//response to metal ion	GO:0048037//cofactor binding;GO:0016758//transferase activity, transferring hexosyl groups	GO:0009536//plastid
	Unigene61458	18.8	5.8	2.01	4.53	1.83	8.32	2.94	5.73	2.26	6.07	508	44	6.6605	gi|30681866|ref|NP_179875.2|	58.9	3e-08	GCN5-related N-acetyltransferase (GNAT) family protein / amino acid kinase family protein [Arabidopsis thaliana]	--	--	--	--	--	--	--	--	--	K00619	9e-10	59.7	rcu:RCOM_0580990	amino-acid N-acetyltransferase [EC:2.3.1.1]	GO:0006520//cellular amino acid metabolic process	GO:0008080//N-acetyltransferase activity	-
	Unigene6163	7.58	0.69	0.67	0	0.74	0	1.48	0	5.11	12.77	252	3	0.9155	gi|224124702|ref|XP_002329927.1|	138	2e-32	oligopeptide transporter OPT family [Populus trichocarpa] >gi|222871949|gb|EEF09080.1| oligopeptide transporter OPT family [Populus trichocarpa]	sp|Q9FG72|OPT1_ARATH	135	6e-32	Oligopeptide transporter 1 OS=Arabidopsis thaliana GN=OPT1 PE=2 SV=1	--	--	--	--	--	--	--	--	--	--	GO:0015833//peptide transport	GO:0015197//peptide transporter activity	GO:0044464//cell part
	Unigene61668	574.86	163.52	98.46	141	58.32	4.29	1.09	0	3.52	7.36	514	644	96.348	gi|18252655|gb|AAL66379.1|AF461740_1	249	1e-65	MADS-box transcription factor MADS4 [Pisum sativum] >gi|13446154|emb|CAC35027.1| MADS-box transcription factor [Pisum sativum] >gi|13661024|emb|CAC37031.1| MADS-box transcription factor [Pisum sativum]	sp|P35631|AP1_ARATH	208	1e-53	Floral homeotic protein APETALA 1 OS=Arabidopsis thaliana GN=AP1 PE=1 SV=2	--	--	--	--	--	K09264	1e-54	208	ath:AT1G69120	MADS-box transcription factor, plant	GO:0010468//regulation of gene expression;GO:0006351//transcription, DNA-dependent	GO:0030528//transcription regulator activity;GO:0003677//DNA binding	GO:0043231//intracellular membrane-bounded organelle
	Unigene61678	297.03	15.85	14.87	5.17	5.07	77.97	75.26	2.33	3.81	8.02	514	423	63.2845	gi|290488878|gb|ADD30823.1|	355	1e-97	photosystem I P700 apoprotein A1 [Nelumbo nucifera]	sp|Q09G46|PSAA_PLAOC	353	3e-97	Photosystem I P700 chlorophyll a apoprotein A1 OS=Platanus occidentalis GN=psaA PE=3 SV=1	--	--	--	--	--	K02689	2e-97	351	vvi:4025091	photosystem I core protein Ia	GO:0051234//establishment of localization;GO:0006464//protein modification process;GO:0006091//generation of precursor metabolites and energy	GO:0046906//tetrapyrrole binding;GO:0046872//metal ion binding;GO:0051536//iron-sulfur cluster binding	GO:0009521;GO:0031224//intrinsic to membrane;GO:0009534//chloroplast thylakoid
	Unigene62104	10.55	3.28	4.5	2.01	1.76	0	1.06	1.95	2.34	5.8	528	34	4.9518	gi|224071463|ref|XP_002303472.1|	325	1e-88	urea active transporter-like protein, solute:sodium symporter [Populus trichocarpa] >gi|222840904|gb|EEE78451.1| urea active transporter-like protein, solute:sodium symporter [Populus trichocarpa]	sp|O94469|DUR31_SCHPO	182	1e-45	Probable urea active transporter 1 OS=Schizosaccharomyces pombe GN=dur3-1 PE=2 SV=1	SPBC23G7.13c	182	3e-46	COG0591	Na+/proline symporter	--	--	--	--	--	GO:0030001//metal ion transport	-	GO:0031224//intrinsic to membrane
	Unigene6310	76.76	18.57	20.62	36.71	27.93	31.51	32.04	26.92	2.09	7.61	280	60	16.4783	gi|15242536|ref|NP_198817.1|	117	5e-26	AATP1 (AAA-ATPase 1); ATP binding / ATPase/ nucleoside-triphosphatase/ nucleotide binding [Arabidopsis thaliana]	--	--	--	--	--	--	--	--	--	K08900	3e-28	119	pop:POPTR_555294	mitochondrial chaperone BCS1	GO:0009725//response to hormone stimulus	GO:0017111//nucleoside-triphosphatase activity;GO:0032559//adenyl ribonucleotide binding	GO:0043231//intracellular membrane-bounded organelle
	Unigene63222	264.02	38.34	16.23	20.07	17.14	31.23	63.84	0	4.14	11.64	565	266	36.2037	gi|54648782|gb|AAV36809.1|	167	7e-41	arginase 2 [Solanum lycopersicum]	sp|Q9ZPF5|ARGI2_ARATH	160	6e-39	Probable arginase OS=Arabidopsis thaliana GN=At4g08870 PE=1 SV=1	mlr4895	72.8	3e-13	COG0010	Arginase/agmatinase/formimionoglutamate hydrolase, arginase family	K01476	5e-39	157	osa:4334912	arginase [EC:3.5.3.1]	GO:0006952//defense response;GO:0009446//putrescine biosynthetic process;GO:0006525//arginine metabolic process	GO:0016813//hydrolase activity, acting on carbon-nitrogen (but not peptide) bonds, in linear amidines;GO:0046914//transition metal ion binding	GO:0009536//plastid
	Unigene66644	453.43	18.73	16.73	22.06	54.25	45.27	211.93	0.47	2.14	5.53	731	1241	130.549	gi|139478687|gb|ABO77632.1|	342	3e-93	peroxidase [Medicago truncatula]	sp|Q9FLC0|PER52_ARATH	292	1e-78	Peroxidase 52 OS=Arabidopsis thaliana GN=PER52 PE=2 SV=1	--	--	--	--	--	K00430	1e-79	292	ath:AT5G05340	peroxidase [EC:1.11.1.7]	GO:0042743//hydrogen peroxide metabolic process;GO:0006950//response to stress	GO:0016209//antioxidant activity;GO:0005506//iron ion binding;GO:0003824//catalytic activity	GO:0005576//extracellular region;GO:0030312//external encapsulating structure
	Unigene66840	31.71	9.73	11.81	13.03	9.21	1.97	7.49	15.8	2.01	4.94	748	107	11.0002	gi|166203236|gb|ABY84658.1|	244	1e-63	transcription factor [Glycine max]	sp|Q93WV0|WRK20_ARATH	233	1e-60	Probable WRKY transcription factor 20 OS=Arabidopsis thaliana GN=WRKY20 PE=2 SV=1	--	--	--	--	--	K13424	8e-37	150	rcu:RCOM_0664190	WRKY transcription factor 33	GO:0006350//transcription	-	-
	Unigene66850	20.62	3.93	2.27	3.08	4.72	2.7	8.23	1.37	2.5	7.48	749	95	9.7535	gi|18397039|ref|NP_566241.1|	313	1e-84	DRT102 (DNA-DAMAGE-REPAIR/TOLERATION 2) [Arabidopsis thaliana] >gi|148872800|sp|Q05212.2|DR102_ARATH RecName: Full=DNA-damage-repair/toleration protein DRT102 >gi|15529165|gb|AAK97677.1| AT3g04880/T9J14_17 [Arabidopsis thaliana] >gi|23505883|gb|AAN28801.1| At3g04880/T9J14_17 [Arabidopsis thaliana]	sp|Q05212|DR102_ARATH	313	6e-85	DNA-damage-repair/toleration protein DRT102 OS=Arabidopsis thaliana GN=DRT102 PE=2 SV=2	TM1080	81.6	1e-15	COG0698	Ribose 5-phosphate isomerase RpiB	--	--	--	--	--	GO:0009416//response to light stimulus;GO:0006290//pyrimidine dimer repair	-	GO:0044424//intracellular part
	Unigene6720	9.29	3.37	2.64	1.38	1.45	2.86	0.73	4	2.32	5.84	257	17	5.0867	gi|18404292|ref|NP_565856.1|	59.3	9e-18	SIGF (RNA POLYMERASE SIGMA-SUBUniT F); DNA binding / DNA-directed RNA polymerase/ sigma factor/ transcription factor [Arabidopsis thaliana] >gi|7209640|dbj|BAA92288.1| SigF [Arabidopsis thaliana] >gi|7688083|emb|CAB89775.1| sigma factor-like protein [Arabidopsis thaliana]	sp|P52328|RPSD2_BACSP	52.4	9e-07	RNA polymerase sigma factor rpoD OS=Bacillus sp. GN=sigA PE=3 SV=1	SA1390	52.4	2e-07	COG0568	DNA-directed RNA polymerase, sigma subUnit (sigma70/sigma32)	K03086	2e-09	49.7	rcu:RCOM_1515490	RNA polymerase primary sigma factor	GO:0009791//post-embryonic development;GO:0006351//transcription, DNA-dependent;GO:0010557//positive regulation of macromolecule biosynthetic process	GO:0003676//nucleic acid binding;GO:0034062//RNA polymerase activity	GO:0009536//plastid
	Unigene67736	216.42	10.38	10.17	10.18	7.06	6.07	58.48	25.13	3.7	10.51	818	336	31.5868	gi|18420440|ref|NP_568059.1|	341	5e-93	NST-K1 (NUCLEOTIDE SUGAR TRANSPORTER-KT 1); nucleotide-sugar transmembrane transporter [Arabidopsis thaliana] >gi|30692341|ref|NP_849527.1| NST-K1 (NUCLEOTIDE SUGAR TRANSPORTER-KT 1); nucleotide-sugar transmembrane transporter [Arabidopsis thaliana]	sp|Q8RXL8|Y1689_ARATH	143	1e-33	Uncharacterized membrane protein At1g06890 OS=Arabidopsis thaliana GN=At1g06890 PE=1 SV=1	--	--	--	--	--	--	--	--	--	--	GO:0008643//carbohydrate transport	GO:0015144//carbohydrate transmembrane transporter activity	GO:0031224//intrinsic to membrane
	Unigene67820	152.64	44.32	43.85	48.11	62.74	60.61	49.61	51.7	2.43	13.54	825	658	61.3327	gi|20140867|sp|Q9MT28.1|THRC_SOLTU	338	6e-92	RecName: Full=Threonine synthase, chloroplastic; Short=TS; Flags: Precursor >gi|8439547|gb|AAF74984.1|AF082894_1 threonine synthase [Solanum tuberosum]	sp|Q9MT28|THRC_SOLTU	338	3e-92	Threonine synthase, chloroplastic OS=Solanum tuberosum PE=2 SV=1	APE2286	96.3	6e-20	COG0498	Threonine synthase	K01733	1e-92	336	rcu:RCOM_0654720	threonine synthase [EC:4.2.3.1]	GO:0006566//threonine metabolic process	GO:0016838//carbon-oxygen lyase activity, acting on phosphates;GO:0048037//cofactor binding	GO:0009536//plastid
	Unigene67988	255.14	1.44	1.21	6.31	17.89	6.54	105.3	23.37	2.42	6.24	843	391	35.6672	gi|256010126|gb|ACU55136.1|	219	4e-56	dirigent-like protein 2 [Gossypium hirsutum]	sp|P13240|DR206_PEA	77	1e-13	Disease resistance response protein 206 OS=Pisum sativum GN=PI206 PE=2 SV=2	--	--	--	--	--	--	--	--	--	--	GO:0006950//response to stress;GO:0009699//phenylpropanoid biosynthetic process	-	GO:0044464//cell part
	Unigene6900	33.78	0	0.31	0	0.34	0	4.48	2.53	7.54	18.71	542	59	8.3709	gi|124360057|gb|ABN08073.1|	256	8e-84	Lipolytic enzyme, G-D-S-L [Medicago truncatula]	sp|Q9FHQ1|GDL80_ARATH	217	3e-68	GDSL esterase/lipase At5g37690 OS=Arabidopsis thaliana GN=At5g37690 PE=2 SV=1	--	--	--	--	--	--	--	--	--	--	GO:0044238//primary metabolic process	GO:0016788//hydrolase activity, acting on ester bonds	GO:0031410//cytoplasmic vesicle
	Unigene69678	207.44	42.43	41.58	32.58	30.04	98.3	71.35	92.07	2.11	5.22	1066	855	61.6778	gi|20453106|gb|AAM19795.1|	643	0	At2g04030/F3C11.14 [Arabidopsis thaliana]	sp|Q9STX5|ENPL_ARATH	329	2e-89	Endoplasmin homolog OS=Arabidopsis thaliana GN=SHD PE=1 SV=1	SPAC926.04c	298	1e-80	COG0326	Molecular chaperone, HSP90 family	K04079	0	643	vvi:100264968	molecular chaperone HtpG	GO:0010035//response to inorganic substance;GO:0044267//cellular protein metabolic process;GO:0009416//response to light stimulus;GO:0006970//response to osmotic stress;GO:0003006//reproductive developmental process	GO:0005515//protein binding;GO:0032559//adenyl ribonucleotide binding	GO:0009532//plastid stroma;GO:0009526//plastid envelope;GO:0016020//membrane
	Unigene69949	16.77	5.57	7.89	5.85	5.65	2.3	5.84	0.31	2.13	4.68	1120	95	6.5227	gi|87162712|gb|ABD28507.1|	510	1e-143	Leucine-rich repeat; Leucine-rich [Medicago truncatula]	sp|Q40392|TMVRN_NICGU	56.2	4e-07	TMV resistance protein N OS=Nicotiana glutinosa GN=N PE=1 SV=1	--	--	--	--	--	--	--	--	--	--	GO:0009987//cellular process;GO:0006952//defense response	-	GO:0043231//intracellular membrane-bounded organelle;GO:0044444//cytoplasmic part
	Unigene71085	12.87	3.44	3.49	4.01	3.57	5.16	0.77	5.4	2.38	6.04	1460	174	9.1647	gi|21425669|emb|CAC95022.1|	866	0	mitochondrial RNA polymerase [Nicotiana tabacum]	sp|Q8L6J5|RPO1B_TOBAC	866	0	DNA-directed RNA polymerase 1B, mitochondrial OS=Nicotiana tabacum GN=RPOT1-TOM PE=2 SV=2	YFL036w	432	7e-121	COG5108	Mitochondrial DNA-directed RNA polymerase	K10908	0	884	vvi:100263361	DNA-directed RNA polymerase, mitochondrial [EC:2.7.7.6]	GO:0010467//gene expression	GO:0034062//RNA polymerase activity;GO:0003676//nucleic acid binding	GO:0009536//plastid
	Unigene71756	45.71	11.93	10.95	9	7.91	14.72	16.33	13.13	2.8	11.2	2048	536	20.1259	gi|240254313|ref|NP_176555.4|	880	0	MURE; ATP binding / acid-amino acid ligase/ ligase [Arabidopsis thaliana]	sp|Q03523|MURE_BACSU	293	3e-78	UDP-N-acetylmuramoyl-L-alanyl-D-glutamate--2,6-diaminopimelate ligase OS=Bacillus subtilis GN=murE PE=3 SV=1	BS_murE	293	8e-79	COG0769	UDP-N-acetylmuramyl tripeptide synthase	--	--	--	--	--	GO:0065008;GO:0000270//peptidoglycan metabolic process;GO:0042546//cell wall biogenesis	GO:0016881//acid-amino acid ligase activity;GO:0032559//adenyl ribonucleotide binding	GO:0043231//intracellular membrane-bounded organelle
	Unigene71791	198.07	59.59	45.35	68.7	36.14	48.48	38.41	6.53	2.88	7.79	2097	1581	57.9767	gi|223452422|gb|ACM89538.1|	960	0	leucine-rich repeat transmembrane protein kinase [Glycine max]	sp|Q9SGP2|HSL1_ARATH	468	8e-131	Receptor-like protein kinase HSL1 OS=Arabidopsis thaliana GN=HSL1 PE=2 SV=1	alr0124_1	140	1e-32	COG4886	Leucine-rich repeat (LRR) protein	K00924	6e-132	468	ath:AT1G28440	[EC:2.7.1.-]	GO:0006464//protein modification process;GO:0007167//enzyme linked receptor protein signaling pathway	GO:0004672//protein kinase activity;GO:0032559//adenyl ribonucleotide binding	GO:0016020//membrane;GO:0031410//cytoplasmic vesicle
	Unigene7296	28.75	9.58	5.49	6.93	1.25	12.39	10.83	10.62	2.32	5.34	742	182	18.862	gi|240254313|ref|NP_176555.4|	154	1e-36	MURE; ATP binding / acid-amino acid ligase/ ligase [Arabidopsis thaliana]	sp|O10341|Y091_NPVOP	60.8	9e-09	Uncharacterized 29.3 kDa protein OS=Orgyia pseudotsugata multicapsid polyhedrosis virus GN=ORF92 PE=4 SV=1	--	--	--	--	--	--	--	--	--	--	GO:0009987//cellular process;GO:0008152//metabolic process	GO:0016874//ligase activity	GO:0044424//intracellular part
	Unigene7400	27.45	5.38	3.51	6.72	7.7	12.04	4.51	0.59	2.28	6.02	290	5	1.3258	gi|44917014|dbj|BAD12186.1|	84	5e-16	12-oxophytodienoic acid 10,11-reductase [Pisum sativum]	sp|Q9XG54|OPR1_SOLLC	61.6	1e-09	12-oxophytodienoate reductase 1 OS=Solanum lycopersicum GN=OPR1 PE=1 SV=1	--	--	--	--	--	K05894	1e-10	61.6	osa:4340485	12-oxophytodienoic acid reductase [EC:1.3.1.42]	GO:0008152//metabolic process	GO:0016491//oxidoreductase activity;GO:0000166//nucleotide binding	-
	Unigene7449	46.18	13.17	9.85	11.5	10.8	2.79	10.58	15.85	2.91	8.86	724	136	14.4451	gi|75317777|sp|O04249.1|STP7_ARATH	337	1e-91	RecName: Full=Sugar transport protein 7; AltName: Full=Hexose transporter 7 >gi|15487244|emb|CAC69067.1| STP7 protein [Arabidopsis thaliana]	sp|O04249|STP7_ARATH	337	6e-92	Sugar transport protein 7 OS=Arabidopsis thaliana GN=STP7 PE=2 SV=1	L140856	117	2e-26	COG0477	Permeases of the major facilitator superfamily	--	--	--	--	--	GO:0008152//metabolic process;GO:0006810//transport	GO:0015291//secondary active transmembrane transporter activity;GO:0016628//oxidoreductase activity, acting on the CH-CH group of donors, NAD or NADP as acceptor	GO:0031224//intrinsic to membrane
	Unigene7620	7.44	0.81	1.59	2.48	1.74	0	0	0	2.99	6.43	214	4	1.4374	gi|194033248|ref|YP_002000585.1|	86.3	1e-23	apocytochrome b [Oryza sativa Japonica Group] >gi|148886838|sp|P0C524.1|CYB_ORYSJ RecName: Full=Cytochrome b; AltName: Full=Ubiquinol-cytochrome-c reductase complex cytochrome b subUnit; AltName: Full=Cytochrome b-c1 complex subUnit 3; AltName: Full=Complex III subUnit 3; AltName: Full=Complex III subUnit III >gi|1827481|dbj|BAA11679.1| apocytochrome b [Oryza sativa Japonica Group] >gi|60498748|d…	sp|P07747|CYB_WHEAT	86.3	6e-24	Cytochrome b OS=Triticum aestivum GN=MT-CYB PE=2 SV=3	RC0359	69.3	1e-17	COG1290	Cytochrome b subUnit of the bc complex	K00412	4e-25	86.3	pop:POPTR_591303	ubiquinol-cytochrome c reductase cytochrome b subUnit [EC:1.10.2.2]	GO:0051234//establishment of localization;GO:0022900//electron transport chain	GO:0043169//cation binding;GO:0003824//catalytic activity	GO:0043231//intracellular membrane-bounded organelle;GO:0031224//intrinsic to membrane
	Unigene7871	2.44	0	0.65	0	0	0.71	1.08	0	2.27	4.62	521	20	2.952	gi|224070951|ref|XP_002303301.1|	87.4	2e-25	AP2/ERF domain-containing transcription factor [Populus trichocarpa] >gi|222840733|gb|EEE78280.1| AP2/ERF domain-containing transcription factor [Populus trichocarpa]	sp|Q39127|TINY_ARATH	87.4	1e-22	Ethylene-responsive transcription factor TINY OS=Arabidopsis thaliana GN=TINY PE=2 SV=1	--	--	--	--	--	K09286	1e-23	87.4	ath:AT5G25810	EREBP-like factor	GO:0010468//regulation of gene expression;GO:0006351//transcription, DNA-dependent	GO:0003676//nucleic acid binding	GO:0043231//intracellular membrane-bounded organelle
	Unigene808	13.3	1.24	2.03	2.96	2.22	0	0.45	0	4.49	10.26	419	23	4.2212	gi|224090009|ref|XP_002308905.1|	185	1e-62	BOP/NPR1/NIM1-like regulatory protein [Populus trichocarpa] >gi|222854881|gb|EEE92428.1| BOP/NPR1/NIM1-like regulatory protein [Populus trichocarpa]	--	--	--	--	--	--	--	--	--	--	--	--	--	--	GO:0009943//adaxial/abaxial axis specification;GO:0010073//meristem maintenance;GO:0003006//reproductive developmental process;GO:0010557//positive regulation of macromolecule biosynthetic process	GO:0005488//binding	GO:0043231//intracellular membrane-bounded organelle
	Unigene8476	8.19	0.69	0.45	0.23	0	1.46	2.22	0	3.69	9	758	36	3.6522	gi|3850630|emb|CAA10067.1|	223	8e-84	cytochrome P450 [Cicer arietinum]	sp|P93147|C81E1_GLYEC	223	8e-83	Isoflavone 2'-hydroxylase OS=Glycyrrhiza echinata GN=CYP81E1 PE=1 SV=2	alr1450	84.7	1e-16	COG2124	Cytochrome P450	K00517	2e-65	193	ath:AT4G37330	[EC:1.14.-.-]	GO:0008152//metabolic process	GO:0016712//oxidoreductase activity, acting on paired donors, with incorporation or reduction of molecular oxygen, reduced flavin or flavoprotein as one donor, and incorporation of one atom of oxygen;GO:0016709//oxidoreductase activity, acting on paired donors, with incorporation or reduction of molecular oxygen, NADH or NADPH as one donor, and incorporation of one atom of oxygen;GO:0005506//iron…	GO:0044464//cell part
	Unigene8743	11.6	2.1	2.06	0	3.77	5.21	3.03	1.39	2.23	5.39	247	10	3.1133	gi|295311650|ref|YP_003587253.1|	167	4e-41	NADH dehydrogenase subUnit 5 [Citrullus lanatus] >gi|259156778|gb|ACV96640.1| NADH dehydrogenase subUnit 5 [Citrullus lanatus]	sp|P10330|NU5M_OENBE	167	2e-41	NADH-ubiquinone oxidoreductase chain 5 OS=Oenothera bertiana GN=ND5 PE=2 SV=2	AGc2360	73.6	9e-14	COG1009	NADH:ubiquinone oxidoreductase subUnit 5 (chain L)/MultisubUnit Na+/H+ antiporter, MnhA subUnit	K03883	8e-42	164	ath:ArthMp006	NADH dehydrogenase I subUnit 5 [EC:1.6.5.3]	GO:0051234//establishment of localization;GO:0022904//respiratory electron transport chain	GO:0050136//NADH dehydrogenase (quinone) activity	GO:0031224//intrinsic to membrane;GO:0005746//mitochondrial respiratory chain
	Unigene8781	12.92	0	0	0	0	0	0.61	2.78	4.65	11.99	308	6	1.498	gi|241740128|gb|ACS68194.1|	105	7e-41	cellulose synthase 4.2 catalytic subUnit [Brassica napus]	sp|Q84JA6|CESA4_ARATH	105	8e-41	Cellulose synthase A catalytic subUnit 4 [UDP-forming] OS=Arabidopsis thaliana GN=CESA4 PE=1 SV=1	--	--	--	--	--	K10999	6e-42	105	ath:AT5G44030	cellulose synthase A [EC:2.4.1.12]	GO:0006952//defense response;GO:0000160//two-component signal transduction system (phosphorelay);GO:0045229//external encapsulating structure organization;GO:0009250//glucan biosynthetic process;GO:0042545//cell wall modification;GO:0009832//plant-type cell wall biogenesis	GO:0016759//cellulose synthase activity;GO:0046914//transition metal ion binding	GO:0031224//intrinsic to membrane
	Unigene9873	164.29	22.46	15.44	17.6	3.13	0.62	32.72	0	5.02	12.17	594	78	10.0978	gi|1853970|dbj|BAA13542.1|	349	1e-95	CPRD46 protein [Vigna unguiculata]	sp|Q8GSM2|LOX23_HORVU	289	1e-77	Lipoxygenase 2.3, chloroplastic OS=Hordeum vulgare GN=LOX2.3 PE=1 SV=1	--	--	--	--	--	K00454	1e-77	285	osa:4345994	lipoxygenase [EC:1.13.11.12]	GO:0006633//fatty acid biosynthetic process	GO:0046914//transition metal ion binding;GO:0016702//oxidoreductase activity, acting on single donors with incorporation of molecular oxygen, incorporation of two atoms of oxygen	-
	Unigene9922	57.63	16.2	10.08	14.99	22.65	2.73	9.98	13.21	2.54	7.23	674	176	20.0804	gi|75317777|sp|O04249.1|STP7_ARATH	239	2e-62	RecName: Full=Sugar transport protein 7; AltName: Full=Hexose transporter 7 >gi|15487244|emb|CAC69067.1| STP7 protein [Arabidopsis thaliana]	sp|O04249|STP7_ARATH	239	9e-63	Sugar transport protein 7 OS=Arabidopsis thaliana GN=STP7 PE=2 SV=1	sll0771	64.7	1e-10	COG0477	Permeases of the major facilitator superfamily	--	--	--	--	--	GO:0008152//metabolic process;GO:0006810//transport	GO:0015291//secondary active transmembrane transporter activity;GO:0016628//oxidoreductase activity, acting on the CH-CH group of donors, NAD or NADP as acceptor;GO:0022891//substrate-specific transmembrane transporter activity	GO:0031224//intrinsic to membrane
Petals	Unigene10055	3.69	12.62	12.37	5.87	1.85	0.61	2.48	2.84	2.79	6.94	302	23	5.8565	gi|297803126|ref|XP_002869447.1|	125	1e-28	gamma-glutamyl transpeptidase 3 [Arabidopsis lyrata subsp. lyrata] >gi|297315283|gb|EFH45706.1| gamma-glutamyl transpeptidase 3 [Arabidopsis lyrata subsp. lyrata]	sp|O14194|GGT2_SCHPO	73.2	5e-13	Gamma-glutamyltranspeptidase 2 OS=Schizosaccharomyces pombe GN=ggt2 PE=2 SV=1	ECU05g1240	79.7	1e-15	COG0405	Gamma-glutamyltransferase	K00681	3e-35	143	vvi:100247429	gamma-glutamyltranspeptidase [EC:2.3.2.2]	GO:0006749//glutathione metabolic process	GO:0016755	GO:0043231//intracellular membrane-bounded organelle
	Unigene10117	33.92	116.6	152.17	86.22	47.79	2.47	19.13	15.81	2.48	5.41	596	390	50.3197	gi|6066285|gb|AAF03236.1|AF180143_1	105	3e-22	ubiquitin carrier protein 4 [Glycine max]	sp|P42749|UBC5_ARATH	101	3e-21	Ubiquitin-conjugating enzyme E2 5 OS=Arabidopsis thaliana GN=UBC5 PE=2 SV=2	YEL012w	86.7	3e-17	COG5078	Ubiquitin-protein ligase	K10576	3e-23	105	zma:100193596	ubiquitin-conjugating enzyme E2 H [EC:6.3.2.19]	GO:0019538//protein metabolic process	GO:0016874//ligase activity	-
	Unigene10171	0	5.32	11.39	1.98	0	0	0.52	1.44	4.34	9.33	358	24	5.1552	gi|37051111|dbj|BAC81652.1|	72	3e-18	short-chain alcohol dehydrogenase A [Pisum sativum]	sp|Q7FAE1|MOMAS_ORYSJ	53.1	4e-08	Momilactone A synthase OS=Oryza sativa subsp. japonica GN=Os04g0179200 PE=2 SV=1	--	--	--	--	--	K13070	3e-09	53.1	osa:4335093	momilactone-A synthase [EC:1.1.1.295]	GO:0008152//metabolic process	GO:0016616//oxidoreductase activity, acting on the CH-OH group of donors, NAD or NADP as acceptor	-
	Unigene1019	0.85	6.9	12.4	1.18	0.25	0.73	0.5	0.45	8.07	26.5	753	41	4.1871	gi|115466738|ref|NP_001056968.1|	52.4	1e-14	Os06g0179200 [Oryza sativa Japonica Group] >gi|24413989|dbj|BAC22240.1| nodulin-like protein [Oryza sativa Japonica Group] >gi|113595008|dbj|BAF18882.1| Os06g0179200 [Oryza sativa Japonica Group]	sp|Q8S3J3|HIUH_SOYBN	62	4e-09	Hydroxyisourate hydrolase OS=Glycine max GN=HIUH PE=1 SV=1	--	--	--	--	--	--	--	--	--	--	GO:0009112	GO:0015926//glucosidase activity;GO:0016812//hydrolase activity, acting on carbon-nitrogen (but not peptide) bonds, in cyclic amides;GO:0043167//ion binding	GO:0044439//peroxisomal part;GO:0031224//intrinsic to membrane
	Unigene10268	6.26	29.42	57.32	9.54	10.41	2.28	0.39	0	3.08	6.39	483	177	28.1803	gi|19880037|gb|AAM00232.1|AF358432_1	249	1e-65	root-specific chalcone synthase [Senna alata]	sp|P48406|CHS5_SOYBN	247	3e-65	Chalcone synthase 5 OS=Glycine max GN=CHS5 PE=3 SV=1	BH0617	80.5	1e-15	COG3424	Predicted naringenin-chalcone synthase	K00660	3e-61	230	rcu:RCOM_1020600	chalcone synthase [EC:2.3.1.74]	GO:0009699//phenylpropanoid biosynthetic process	GO:0016747//transferase activity, transferring acyl groups other than amino-acyl groups	-
	Unigene10323	0.72	7.81	6.12	1.6	0.42	1.66	0	0	3.12	6.75	444	12	2.0783	gi|224082562|ref|XP_002306742.1|	157	4e-38	outward rectifying potassium channel [Populus trichocarpa] >gi|222856191|gb|EEE93738.1| outward rectifying potassium channel [Populus trichocarpa]	sp|Q9SVV6|KCO6_ARATH	93.6	4e-19	Probable calcium-activated outward-rectifying potassium channel 6 OS=Arabidopsis thaliana GN=KCO6 PE=2 SV=1	--	--	--	--	--	K05389	5e-22	100	pop:POPTR_586969	potassium channel subfamily K, other eukaryote	GO:0006810//transport	GO:0005216//ion channel activity	GO:0000325//plant-type vacuole;GO:0016020//membrane
	Unigene10334	4.47	78.69	99.65	27.57	0.95	4.69	4.77	3.06	14.4	39.93	392	91	17.8515	gi|224064438|ref|XP_002301476.1|	149	1e-35	multidrug resistance protein ABC transporter family [Populus trichocarpa] >gi|222843202|gb|EEE80749.1| multidrug resistance protein ABC transporter family [Populus trichocarpa]	sp|Q7DM58|AB4C_ARATH	136	5e-32	ABC transporter C family member 4 OS=Arabidopsis thaliana GN=ABCC4 PE=1 SV=2	SPBC359.05	63.2	1e-10	COG1132	ABC-type multidrug transport system, ATPase and permease components	K05666	4e-08	53.5	olu:OSTLU_35503	ATP-binding cassette, subfamily C (CFTR/MRP), member 2	GO:0009987//cellular process;GO:0006810//transport;GO:0051707//response to other organism;GO:0042221//response to chemical stimulus;GO:0006950//response to stress	GO:0017111//nucleoside-triphosphatase activity;GO:0051183//vitamin transporter activity;GO:0016491//oxidoreductase activity;GO:0000166//nucleotide binding;GO:0015405//P-P-bond-hydrolysis-driven transmembrane transporter activity	GO:0031090//organelle membrane;GO:0005773//vacuole
	Unigene10394	0	0	0	14.31	1.43	0	0	0	3.33	7	260	6	1.7746	gi|159473469|ref|XP_001694856.1|	94.7	3e-19	acidic ribosomal protein P2 [Chlamydomonas reinhardtii] >gi|158276235|gb|EDP02008.1| acidic ribosomal protein P2 [Chlamydomonas reinhardtii]	sp|P02401|RLA2_RAT	92.4	8e-19	60S acidic ribosomal protein P2 OS=Rattus norvegicus GN=Rplp2 PE=1 SV=2	SPAC1071.08	83.6	8e-17	COG2058	Ribosomal protein L12E/L44/L45/RPP1/RPP2	K02943	1e-20	94.7	cre:CHLREDRAFT_195600	large subUnit ribosomal protein LP2	GO:0006412//translation	-	GO:0005622//intracellular
	Unigene10457	0	0.68	0.67	0	0	0	0	0	#DIV/0!	#DIV/0!	255	2	0.6031	gi|167860772|gb|ACA05157.1|	72.8	2e-17	Xa21-like protein [Triticum aestivum] >gi|167860776|gb|ACA05159.1| Xa21-like protein [Triticum aestivum]	sp|C0LGP4|Y3475_ARATH	70.9	9e-16	Probable LRR receptor-like serine/threonine-protein kinase At3g47570 OS=Arabidopsis thaliana GN=At3g47570 PE=1 SV=1	--	--	--	--	--	K13428	2e-16	67.4	ath:AT5G20480	LRR receptor-like serine/threonine-protein kinase EFR [EC:2.7.11.1]	GO:0006464//protein modification process	GO:0004871//signal transducer activity;GO:0004713//protein tyrosine kinase activity;GO:0016628//oxidoreductase activity, acting on the CH-CH group of donors, NAD or NADP as acceptor;GO:0004674//protein serine/threonine kinase activity;GO:0032559//adenyl ribonucleotide binding	GO:0031224//intrinsic to membrane;GO:0031410//cytoplasmic vesicle
	Unigene1057	0	0.82	2.41	0.84	0	0	0	0	#DIV/0!	#DIV/0!	211	2	0.7289	gi|255635409|gb|ACU18057.1|	42	3e-08	unknown [Glycine max]	--	--	--	--	--	--	--	--	--	--	--	--	--	--	GO:0010468//regulation of gene expression	-	GO:0043231//intracellular membrane-bounded organelle
	Unigene10690	2.41	7.22	9.65	6.04	2.82	0.7	3.54	0	2.16	3.86	264	7	2.039	gi|31088360|gb|AAP44102.1|	85.9	2e-26	peptide transporter 1 [Vicia faba]	sp|P46032|PTR2_ARATH	80.9	4e-22	Peptide transporter PTR2 OS=Arabidopsis thaliana GN=PTR2 PE=1 SV=1	--	--	--	--	--	K03305	1e-27	88.2	rcu:RCOM_0776160	proton-dependent oligopeptide transporter, POT family	GO:0015833//peptide transport	-	GO:0031224//intrinsic to membrane
	Unigene10721	0	0	3.48	0	0	0	0	0	#DIV/0!	#DIV/0!	293	5	1.3123	gi|60502225|gb|AAX22220.1|	160	5e-39	Unifoliata protein [Medicago truncatula] >gi|110348145|gb|ABG72800.1| UniFOLIATA protein [Medicago truncatula]	sp|O48559|Uni_PEA	159	7e-39	Protein UniFOLIATA OS=Pisum sativum GN=Uni PE=2 SV=1	--	--	--	--	--	--	--	--	--	--	GO:0010468//regulation of gene expression;GO:0032501//multicellular organismal process	GO:0003676//nucleic acid binding	GO:0043231//intracellular membrane-bounded organelle
	Unigene10752	10.02	27.65	48.78	27.96	10.56	7.01	16.4	12.91	2.12	6.68	1128	351	23.9286	gi|15219226|ref|NP_173089.1|	262	6e-77	ATOCT3 (ARABIDOPSIS THALIANA ORGANIC CATION/CARNITINE TRANSPORTER 3); carbohydrate transmembrane transporter/ sugar:hydrogen symporter [Arabidopsis thaliana] >gi|4966360|gb|AAD34691.1|AC006341_19 Is a member of the PF|00083 sugar transporter family [Arabidopsis thaliana] >gi|18958009|gb|AAL79578.1| At1g16390/F3O9_19 [Arabidopsis thaliana] >gi|23507793|gb|AAN38700.1| At1g16390/F3O9_19 [Arabidopsis…	sp|O88446|S22A3_RAT	108	2e-26	Solute carrier family 22 member 3 OS=Rattus norvegicus GN=Slc22a3 PE=2 SV=1	STM0079	56.2	6e-09	COG0477	Permeases of the major facilitator superfamily	--	--	--	--	--	GO:0006810//transport	GO:0005215//transporter activity	GO:0044464//cell part
	Unigene10779	2.51	10.39	14.47	12.86	4.11	0	0.59	3.24	3.06	6	317	31	7.5201	gi|15239403|ref|NP_197919.1|	184	3e-46	PLDALPHA3 (PHOSPHLIPASE D ALPHA 3); phospholipase D [Arabidopsis thaliana] >gi|20138932|sp|P58766.1|PLDZ1_ARATH RecName: Full=Phospholipase D zeta; Short=AtPLDzeta; Short=PLD zeta	sp|P58766|PLDZ1_ARATH	184	1e-46	Phospholipase D zeta OS=Arabidopsis thaliana GN=PLDZETA PE=2 SV=1	ECU11g1180	74.7	4e-14	COG1502	Phosphatidylserine/phosphatidylglycerophosphate/cardiolipin synthases and related enzymes	K01115	1e-47	184	ath:AT5G25370	phospholipase D [EC:3.1.4.4]	GO:0010118//stomatal movement;GO:0010038//response to metal ion;GO:0032787;GO:0006643//membrane lipid metabolic process;GO:0006650//glycerophospholipid metabolic process;GO:0006970//response to osmotic stress;GO:0032501//multicellular organismal process;GO:0009738//abscisic acid mediated signaling pathway	GO:0004620//phospholipase activity;GO:0046872//metal ion binding;GO:0035091//phosphoinositide binding	GO:0030135//coated vesicle;GO:0009536//plastid;GO:0016020//membrane
	Unigene1094	9.74	35.8	34.47	13.26	6.2	6.07	8.44	13.18	2.11	6.52	3301	906	21.1058	gi|42570340|ref|NP_850154.2|	1222	0	HVT1 (HELICASE IN VASCULAR TISSUE AND TAPETUM); ATP binding / helicase/ nucleic acid binding [Arabidopsis thaliana]	sp|B2RR83|YTDC2_MOUSE	574	2e-162	Probable ATP-dependent RNA helicase YTHDC2 OS=Mus musculus GN=Ythdc2 PE=2 SV=1	SPBC15C4.05	211	7e-54	COG1643	HrpA-like helicases	K12818	7e-46	183	ath:AT3G26560	ATP-dependent RNA helicase DHX8/PRP22 [EC:3.6.4.13]	GO:0044260	GO:0004386//helicase activity;GO:0042623//ATPase activity, coupled;GO:0032559//adenyl ribonucleotide binding	GO:0043231//intracellular membrane-bounded organelle
	Unigene11852	1.58	1.23	1.09	52.73	5.55	7.05	0.13	1.09	2.6	5.04	1408	322	17.5863	gi|213959111|gb|ACJ54890.1|	678	0	heat shock protein 70 [Oryza sativa Japonica Group]	sp|Q9U639|HSP7D_MANSE	823	0	Heat shock 70 kDa protein cognate 4 OS=Manduca sexta PE=2 SV=1	SPAC13G7.02c	664	0	COG0443	Molecular chaperone	K03283	0	680	osa:4332420	heat shock 70kDa protein 1/8	GO:0051707//response to other organism;GO:0010038//response to metal ion;GO:0044267//cellular protein metabolic process;GO:0006950//response to stress	GO:0019899//enzyme binding;GO:0032559//adenyl ribonucleotide binding	GO:0005840//ribosome;GO:0030312//external encapsulating structure;GO:0031981//nuclear lumen;GO:0009536//plastid;GO:0005576//extracellular region;GO:0016020//membrane
	Unigene11926	0	0	0.14	0	0	0	0	0	#DIV/0!	#DIV/0!	1176	110	7.1929	gi|3219280|dbj|BAA28834.1|	291	1e-77	delta-9 fatty acid desaturase [Cyanidioschyzon merolae]	sp|Q12618|ACO1_AJECA	460	1e-142	Acyl-CoA desaturase OS=Ajellomyces capsulata GN=OLE1 PE=3 SV=1	SPCC1281.06c_1	346	3e-103	COG1398	Fatty-acid desaturase	K00507	7e-79	291	cme:CMM045C	stearoyl-CoA desaturase (delta-9 desaturase) [EC:1.14.19.1]	GO:0006629//lipid metabolic process	GO:0005488//binding;GO:0016491//oxidoreductase activity	GO:0044464//cell part
	Unigene11964	7.66	28.52	27.73	23.78	4.48	8.38	1.89	1.73	3.18	7	790	169	16.4505	gi|297847246|ref|XP_002891504.1|	214	1e-67	long-chain acyl-CoA synthetase 2 [Arabidopsis lyrata subsp. lyrata] >gi|297337346|gb|EFH67763.1| long-chain acyl-CoA synthetase 2 [Arabidopsis lyrata subsp. lyrata]	sp|Q55DR6|FCSA_DICDI	82.8	2e-15	Fatty acyl-CoA synthetase A OS=Dictyostelium discoideum GN=fcsA PE=1 SV=1	SPBC18H10.02	61.2	2e-09	COG1022	Long-chain acyl-CoA synthetases (AMP-forming)	K01897	9e-69	212	ath:AT1G49430	long-chain acyl-CoA synthetase [EC:6.2.1.3]	GO:0006633//fatty acid biosynthetic process;GO:0006952//defense response;GO:0010102//lateral root morphogenesis	GO:0015645//fatty-acid ligase activity	GO:0016020//membrane
	Unigene12014	9.36	34.29	38.14	31.27	1.99	1.47	0.5	0.46	3.69	8.48	374	113	23.2342	gi|297852362|ref|XP_002894062.1|	99	1e-20	CYP96A8 [Arabidopsis lyrata subsp. lyrata] >gi|297339904|gb|EFH70321.1| CYP96A8 [Arabidopsis lyrata subsp. lyrata]	sp|Q9FMY1|C86B1_ARATH	80.1	4e-15	Cytochrome P450 86B1 OS=Arabidopsis thaliana GN=CYP86B1 PE=2 SV=1	--	--	--	--	--	K00517	5e-20	92.8	ath:AT5G52320	[EC:1.14.-.-]	GO:0006633//fatty acid biosynthetic process	GO:0005488//binding;GO:0016713	GO:0043231//intracellular membrane-bounded organelle
	Unigene1211	0	10.58	11.16	0.83	0	3.45	0.88	0	2.18	4.45	213	5	1.8051	gi|224082562|ref|XP_002306742.1|	78.6	2e-14	outward rectifying potassium channel [Populus trichocarpa] >gi|222856191|gb|EEE93738.1| outward rectifying potassium channel [Populus trichocarpa]	sp|Q9SVV6|KCO6_ARATH	70.1	4e-12	Probable calcium-activated outward-rectifying potassium channel 6 OS=Arabidopsis thaliana GN=KCO6 PE=2 SV=1	--	--	--	--	--	K05389	3e-13	70.1	ath:AT4G18160	potassium channel subfamily K, other eukaryote	GO:0006811//ion transport;GO:0051259//protein oligomerization	GO:0005249//voltage-gated potassium channel activity	GO:0000325//plant-type vacuole;GO:0016020//membrane
	Unigene12216	0	0	0	30.56	0.52	1.79	0	0	5.69	12.54	719	61	6.5241	gi|38325811|gb|AAR17078.1|	237	4e-83	heat shock protein 70-1 [Nicotiana tabacum]	sp|Q9U639|HSP7D_MANSE	264	8e-96	Heat shock 70 kDa protein cognate 4 OS=Manduca sexta PE=2 SV=1	SPAC13G7.02c	222	2e-78	COG0443	Molecular chaperone	K03283	1e-81	222	sbi:SORBI_01g039390	heat shock 70kDa protein 1/8	GO:0008152//metabolic process;GO:0050896//response to stimulus	GO:0016628//oxidoreductase activity, acting on the CH-CH group of donors, NAD or NADP as acceptor;GO:0032559//adenyl ribonucleotide binding	-
	Unigene1330	6.12	19.26	20.32	9.84	1.59	6.28	4.79	3.66	2.62	6.17	234	10	3.2863	gi|224064438|ref|XP_002301476.1|	59.3	4e-15	multidrug resistance protein ABC transporter family [Populus trichocarpa] >gi|222843202|gb|EEE80749.1| multidrug resistance protein ABC transporter family [Populus trichocarpa]	sp|Q9LZJ5|AB14C_ARATH	52.4	3e-12	ABC transporter C family member 14 OS=Arabidopsis thaliana GN=ABCC14 PE=1 SV=1	--	--	--	--	--	--	--	--	--	--	GO:0009987//cellular process;GO:0015893//drug transport;GO:0051707//response to other organism;GO:0006950//response to stress	GO:0042626//ATPase activity, coupled to transmembrane movement of substances;GO:0051183//vitamin transporter activity;GO:0016491//oxidoreductase activity;GO:0032559//adenyl ribonucleotide binding	GO:0031224//intrinsic to membrane;GO:0031090//organelle membrane;GO:0005773//vacuole
	Unigene13426	2.72	6.15	15.62	10.48	3.67	1.21	0	1.13	2.93	6.22	761	69	6.9724	gi|211906538|gb|ACJ11762.1|	380	1e-104	class III peroxidase [Gossypium hirsutum]	sp|P22195|PER1_ARAHY	370	5e-102	Cationic peroxidase 1 OS=Arachis hypogaea GN=PNC1 PE=1 SV=2	--	--	--	--	--	K00430	2e-89	325	ath:AT5G05340	peroxidase [EC:1.11.1.7]	GO:0008152//metabolic process;GO:0006950//response to stress	GO:0005506//iron ion binding;GO:0003824//catalytic activity;GO:0016209//antioxidant activity	-
	Unigene13437	2.97	13.53	13.06	8.05	0.87	0.64	1.74	1.2	3.89	10.85	858	78	6.9908	gi|186513260|ref|NP_194210.2|	81.3	1e-14	ATP binding / DNA binding / DNA-directed DNA polymerase [Arabidopsis thaliana] >gi|186513264|ref|NP_001119046.1| ATP binding / DNA binding / DNA-directed DNA polymerase [Arabidopsis thaliana]	--	--	--	--	--	--	--	--	--	--	--	--	--	--	GO:0006259//DNA metabolic process	GO:0003676//nucleic acid binding;GO:0016462//pyrophosphatase activity;GO:0032559//adenyl ribonucleotide binding;GO:0034061	GO:0042575
	Unigene13783	3.52	11.73	13.71	11.54	5.82	0.48	1.7	2.01	2.12	4.69	768	88	8.8113	gi|10241605|emb|CAC09581.1|	264	1e-88	protein kinase [Fagus sylvatica]	sp|Q8S8Y8|WNK6_ARATH	269	2e-84	Probable serine/threonine-protein kinase WNK6 OS=Arabidopsis thaliana GN=WNK6 PE=2 SV=1	YAR019c	67.4	2e-11	COG0515	Serine/threonine protein kinase	K12132	2e-66	228	pop:POPTR_1096507	serine/threonine-protein kinase WNK1 [EC:2.7.11.1]	GO:0006464//protein modification process	GO:0004702//receptor signaling protein serine/threonine kinase activity;GO:0032559//adenyl ribonucleotide binding	-
	Unigene15832	4.56	16.64	17.52	9.54	6.59	0.9	0.91	5.42	2.21	4.14	2656	426	12.3339	gi|4867805|emb|CAB43063.1|	476	0	phospholipase D1 [Craterostigma plantagineum]	sp|Q9SSQ9|PLDA2_ARATH	463	0	Phospholipase D alpha 2 OS=Arabidopsis thaliana GN=PLDALPHA2 PE=2 SV=1	ECU11g1180	77	6e-28	COG1502	Phosphatidylserine/phosphatidylglycerophosphate/cardiolipin synthases and related enzymes	K01115	0	470	vvi:100232987	phospholipase D [EC:3.1.4.4]	GO:0006650//glycerophospholipid metabolic process	GO:0046872//metal ion binding;GO:0004620//phospholipase activity	GO:0009526//plastid envelope
	Unigene15955	0.73	5.58	3.51	1.63	0.43	0.85	0	0.39	4.23	9.36	435	13	2.2981	gi|87240477|gb|ABD32335.1|	122	2e-27	Disease resistance protein; Heat shock protein DnaJ, N-terminal; AAA ATPase [Medicago truncatula]	sp|O64973|RPS5_ARATH	49.7	6e-06	Disease resistance protein RPS5 OS=Arabidopsis thaliana GN=RPS5 PE=1 SV=2	--	--	--	--	--	K13459	1e-09	58.9	rcu:RCOM_1047690	disease resistance protein RPS2	GO:0006950//response to stress	GO:0016787//hydrolase activity;GO:0000166//nucleotide binding	-
	Unigene16018	4.85	32.17	38.67	15.16	5.13	0.4	0.81	2.24	5.59	11.74	1379	246	13.718	gi|38194929|gb|AAR13317.1|	77.8	3e-13	gag-pol polyprotein [Phaseolus vulgaris]	--	--	--	--	--	--	--	--	--	--	--	--	--	--	GO:0006259//DNA metabolic process	GO:0003676//nucleic acid binding	-
	Unigene16227	0.32	14.7	14.24	1.96	0.19	0.55	0	0	18.6	43.12	1992	142	5.4817	gi|224121336|ref|XP_002318557.1|	786	0	aminophospholipid ATPase [Populus trichocarpa] >gi|222859230|gb|EEE96777.1| aminophospholipid ATPase [Populus trichocarpa]	sp|Q9LI83|ALA10_ARATH	708	0	Phospholipid-transporting ATPase 10 OS=Arabidopsis thaliana GN=ALA10 PE=1 SV=1	YAL026c	315	8e-113	COG0474	Cation transport ATPase	K01530	0	796	vvi:100247431	phospholipid-translocating ATPase [EC:3.6.3.1]	GO:0009206;GO:0006869//lipid transport	GO:0042625//ATPase activity, coupled to transmembrane movement of ions;GO:0046872//metal ion binding;GO:0005548//phospholipid transporter activity;GO:0005515//protein binding;GO:0032559//adenyl ribonucleotide binding	GO:0031224//intrinsic to membrane;GO:0009526//plastid envelope
	Unigene16296	3.34	27.72	21.08	6.66	2.28	1.61	5.06	1.2	3.65	10.18	1144	130	8.7385	gi|15227323|ref|NP_181661.1|	351	9e-96	strictosidine synthase family protein [Arabidopsis thaliana] >gi|52627085|gb|AAU84669.1| At2g41290 [Arabidopsis thaliana] >gi|55167922|gb|AAV43793.1| At2g41290 [Arabidopsis thaliana]	sp|P94111|STS1_ARATH	196	3e-49	Strictosidine synthase 1 OS=Arabidopsis thaliana GN=SS1 PE=2 SV=2	PA1293	152	1e-36	COG3386	Gluconolactonase	K01757	3e-50	196	ath:AT1G74020	strictosidine synthase [EC:4.3.3.2]	GO:0008152//metabolic process	GO:0016843	GO:0005618//cell wall;GO:0043231//intracellular membrane-bounded organelle;GO:0016020//membrane;GO:0031410//cytoplasmic vesicle
	Unigene16314	9.13	42.32	46.58	11.47	14.17	4.07	0.74	8.17	2.36	5.12	1761	584	25.502	gi|71043507|dbj|BAE16174.1|	789	0	polyamine oxidase [Nicotiana tabacum]	sp|Q9FNA2|PAO1_ARATH	687	0	Polyamine oxidase 1 OS=Arabidopsis thaliana GN=PAO1 PE=1 SV=1	mll3668	88.2	4e-17	COG1231	Monoamine oxidase	K13366	0	687	ath:AT5G13700	polyamine oxidase (propane-1,3-diamine-forming) [EC:1.5.3.14]	GO:0008152//metabolic process	GO:0016647//oxidoreductase activity, acting on the CH-NH group of donors, oxygen as acceptor	-
	Unigene16353	0.34	9.2	10.1	1.13	0.4	0.39	0	0	17.22	31.9	471	18	2.9388	gi|24461856|gb|AAN62343.1|AF506028_10	150	2e-40	nodulin-like protein [Citrus trifoliata]	--	--	--	--	--	--	--	--	--	--	--	--	--	--	GO:0006810//transport	-	GO:0043231//intracellular membrane-bounded organelle
	Unigene16444	3.92	29.45	22.25	17.7	6.76	2.15	0.48	6.44	3.42	7.08	771	79	7.8794	gi|224135105|ref|XP_002327567.1|	127	2e-47	NAC domain protein, IPR003441 [Populus trichocarpa] >gi|222836121|gb|EEE74542.1| NAC domain protein, IPR003441 [Populus trichocarpa]	--	--	--	--	--	--	--	--	--	--	--	--	--	--	GO:0032501//multicellular organismal process	-	-
	Unigene16549	3.72	13.61	11.54	7.52	1.98	1.95	0.4	5.09	2.14	4.56	471	105	17.1431	gi|562006|gb|AAA82975.1|	212	1e-64	PsHSP71.2 [Pisum sativum] >gi|1771479|emb|CAA67867.1| heat shock protein hsp70 [Pisum sativum]	sp|P26413|HSP70_SOYBN	199	4e-60	Heat shock 70 kDa protein OS=Glycine max GN=HSP70 PE=3 SV=1	SPAC13G7.02c	162	7e-45	COG0443	Molecular chaperone	K03283	1e-58	191	sbi:SORBI_03g039360	heat shock 70kDa protein 1/8	GO:0008152//metabolic process;GO:0050896//response to stimulus	GO:0016628//oxidoreductase activity, acting on the CH-CH group of donors, NAD or NADP as acceptor;GO:0032559//adenyl ribonucleotide binding	-
	Unigene16552	5.71	12.73	19.99	2.96	4.35	1.23	0.94	0.86	2.08	4.1	1198	158	10.1419	gi|284449851|emb|CBJ19440.1|	323	1e-121	SLAC-homologous 1 protein [Citrus clementina]	sp|P44741|TEHA_HAEIN	51.2	9e-09	Tellurite resistance protein tehA homolog OS=Haemophilus influenzae GN=tehA PE=3 SV=1	HI0511	51.2	2e-09	COG1275	Tellurite resistance protein and related permeases	--	--	--	--	--	GO:0050801//ion homeostasis	-	GO:0016020//membrane
	Unigene16865	11.83	50.31	56.86	36.29	6.92	4.85	9.5	2.6	4.04	11.13	2046	758	28.4894	gi|71068360|gb|AAZ23107.1|	827	0	plastid ATP/ADP transport protein 2 [Manihot esculenta]	sp|Q39002|TLC1_ARATH	789	0	ADP,ATP carrier protein 1, chloroplastic OS=Arabidopsis thaliana GN=AATP1 PE=1 SV=2	CT065	443	6e-124	COG3202	ATP/ADP translocase	K03301	0	822	pop:POPTR_180906	ATP:ADP antiporter, AAA family	GO:0051234//establishment of localization	GO:0032559//adenyl ribonucleotide binding;GO:0015300//solute:solute antiporter activity	GO:0009941//chloroplast envelope;GO:0031224//intrinsic to membrane
	Unigene16872	12.22	56.68	84.42	29.92	16.6	26.15	7.39	6.57	2.18	5.4	1694	728	33.0475	gi|297821707|ref|XP_002878736.1|	753	0	potassium channel tetramerization domain-containing protein [Arabidopsis lyrata subsp. lyrata] >gi|297324575|gb|EFH54995.1| potassium channel tetramerization domain-containing protein [Arabidopsis lyrata subsp. lyrata]	sp|Q7L273|KCTD9_HUMAN	59.3	8e-08	BTB/POZ domain-containing protein KCTD9 OS=Homo sapiens GN=KCTD9 PE=2 SV=1	--	--	--	--	--	--	--	--	--	--	GO:0030001//metal ion transport	GO:0005488//binding;GO:0005267//potassium channel activity	GO:0005887//integral to plasma membrane
	Unigene16928	8.12	54.79	44.55	26.32	9.29	2.27	1.57	9.41	4.45	9.2	1784	684	29.4837	gi|116309540|emb|CAH66603.1|	500	0	H0211A12.6 [Oryza sativa (indica cultivar-group)]	sp|P04712|SUS1_MAIZE	442	7e-176	Sucrose synthase 1 OS=Zea mays GN=SH-1 PE=2 SV=1	all1059	295	5e-103	COG0438	Glycosyltransferase	K00695	0	499	osa:4331252	sucrose synthase [EC:2.4.1.13]	GO:0005984//disaccharide metabolic process	GO:0035251//UDP-glucosyltransferase activity	-
	Unigene16960	2.73	25.32	22.87	5.4	0.47	0.47	2.26	2.72	6.54	13.85	1574	282	13.7773	gi|297789928|ref|XP_002862884.1|	661	0	HSP70T-2 [Arabidopsis lyrata subsp. lyrata] >gi|297308648|gb|EFH39143.1| HSP70T-2 [Arabidopsis lyrata subsp. lyrata]	sp|P22953|HSP71_ARATH	253	3e-66	Heat shock cognate 70 kDa protein 1 OS=Arabidopsis thaliana GN=HSC70-1 PE=1 SV=3	YER103w	228	3e-59	COG0443	Molecular chaperone	K03283	1e-69	260	rcu:RCOM_1442270	heat shock 70kDa protein 1/8	GO:0009642//response to light intensity;GO:0051707//response to other organism;GO:0010038//response to metal ion;GO:0000302//response to reactive oxygen species;GO:0032446//protein modification by small protein conjugation	GO:0016628//oxidoreductase activity, acting on the CH-CH group of donors, NAD or NADP as acceptor;GO:0019899//enzyme binding;GO:0032559//adenyl ribonucleotide binding	GO:0043231//intracellular membrane-bounded organelle;GO:0030312//external encapsulating structure;GO:0016020//membrane
	Unigene16971	11.29	68.61	63.35	41.56	5.43	2.94	0.32	0.39	5.12	11.81	1748	642	28.2432	gi|15228865|ref|NP_188922.1|	355	1e-96	AT-HSFA6B; DNA binding / transcription factor [Arabidopsis thaliana] >gi|75311595|sp|Q9LUH8.1|HFA6B_ARATH RecName: Full=Heat stress transcription factor A-6b; Short=AtHsfA6b; AltName: Full=AtHsf-07 >gi|9279701|dbj|BAB01258.1| heat shock transcription factor-like protein [Arabidopsis thaliana]	sp|Q9LUH8|HFA6B_ARATH	355	7e-97	Heat stress transcription factor A-6b OS=Arabidopsis thaliana GN=HSFA6b PE=2 SV=1	SPAC2E12.02.02	92	3e-18	COG5169	Heat shock transcription factor	--	--	--	--	--	GO:0006351//transcription, DNA-dependent	GO:0003677//DNA binding	GO:0043231//intracellular membrane-bounded organelle
	Unigene17003	11.1	33.57	41.54	21.87	6.7	2.42	6.51	6.66	2.91	8.35	1750	472	20.7407	gi|18394375|ref|NP_564001.1|	798	0	ABA3 (ABA DEFICIENT 3); Mo-molybdopterin cofactor sulfurase/ selenocysteine lyase [Arabidopsis thaliana] >gi|75169006|sp|Q9C5X8.1|MOCOS_ARATH RecName: Full=Molybdenum cofactor sulfurase; Short=MoCo sulfurase; Short=MOS; AltName: Full=Abscisic acid protein 3; AltName: Full=Low expression of osmotically expressive genes protein 5 >gi|13123673|gb|AAK12939.1|AF325457_1 molybdenum cofactor sulfurase […	sp|Q9C5X8|MOCOS_ARATH	798	0	Molybdenum cofactor sulfurase OS=Arabidopsis thaliana GN=ABA3 PE=1 SV=1	MA1950	253	6e-67	COG0520	Selenocysteine lyase	--	--	--	--	--	GO:0006952//defense response;GO:0044249//cellular biosynthetic process;GO:0017038//protein import;GO:0009687//abscisic acid metabolic process;GO:0009756//carbohydrate mediated signaling;GO:0042040;GO:0006970//response to osmotic stress;GO:0009755//hormone-mediated signaling pathway	GO:0046914//transition metal ion binding;GO:0016740//transferase activity;GO:0016846//carbon-sulfur lyase activity;GO:0048037//cofactor binding	-
	Unigene17093	6.56	21.41	31.31	15.93	8.14	6.37	6.66	10.24	2.24	9.34	1991	763	29.4695	gi|42567433|ref|NP_195313.2|	513	0	aspartyl protease family protein [Arabidopsis thaliana] >gi|190576481|gb|ACE79041.1| At4g35880 [Arabidopsis thaliana] >gi|222423134|dbj|BAH19546.1| AT4G35880 [Arabidopsis thaliana]	sp|Q9LX20|ASPL1_ARATH	223	3e-79	Aspartic proteinase-like protein 1 OS=Arabidopsis thaliana GN=At5g10080 PE=1 SV=1	--	--	--	--	--	K00924	3e-23	80.9	ath:AT5G22850	[EC:2.7.1.-]	GO:0019538//protein metabolic process	GO:0004175//endopeptidase activity	GO:0031224//intrinsic to membrane
	Unigene17282	2.41	48.58	57.38	63.63	20.59	25.9	17.55	0.78	2.18	3.83	660	223	25.9825	gi|148287137|emb|CAM31955.1|	236	2e-61	glucosyltransferase [Glycine max]	sp|Q9AR73|HQGT_RAUSE	216	1e-55	Hydroquinone glucosyltransferase OS=Rauvolfia serpentina GN=AS PE=1 SV=1	--	--	--	--	--	K08237	2e-59	225	pop:POPTR_731288	hydroquinone glucosyltransferase [EC:2.4.1.218]	GO:0006970//response to osmotic stress;GO:0006805//xenobiotic metabolic process	GO:0008194//UDP-glycosyltransferase activity;GO:0016758//transferase activity, transferring hexosyl groups	-
	Unigene17422	8.21	39.36	24.11	12.26	5.21	7.42	3.81	12.46	2.03	5.37	2501	824	25.3357	gi|15217948|ref|NP_176133.1|	1097	0	RXF12; endo-1,4-beta-xylanase/ hydrolase, hydrolyzing O-glycosyl compounds [Arabidopsis thaliana] >gi|8979937|gb|AAF82251.1|AC008051_2 Identical to gene RXF12 from Arabidopsis thaliana gb|AB008015 and contains three Cellulose binding PF|02018 domains and is a member of Glycosyl hydrolase PF|00331 family >gi|6566263|dbj|BAA88262.1| RXF12 [Arabidopsis thaliana] >gi|18181931|dbj|BAB83869.1| xylan en…	sp|P36917|XYNA_THESA	161	2e-38	Endo-1,4-beta-xylanase A OS=Thermoanaerobacter saccharolyticum GN=xynA PE=1 SV=1	TM0070	103	1e-21	COG3693	Beta-1,4-xylanase	--	--	--	--	--	GO:0005975//carbohydrate metabolic process	GO:0004553//hydrolase activity, hydrolyzing O-glycosyl compounds;GO:0043167//ion binding	GO:0030312//external encapsulating structure
	Unigene17504	5.52	39.11	39.95	36.46	16.2	17.49	0.96	1.77	2.2	3.8	1356	398	22.5706	gi|297824109|ref|XP_002879937.1|	731	0	GPDHC1 [Arabidopsis lyrata subsp. lyrata] >gi|297325776|gb|EFH56196.1| GPDHC1 [Arabidopsis lyrata subsp. lyrata]	sp|Q4JUX5|GPDA_CORJK	77.8	2e-13	Glycerol-3-phosphate dehydrogenase [NAD(P)+] OS=Corynebacterium jeikeium (strain K411) GN=gpsA PE=3 SV=1	ML1679	69.3	1e-11	COG0240	Glycerol-3-phosphate dehydrogenase	K00006	2e-12	70.9	pop:POPTR_908191	glycerol-3-phosphate dehydrogenase (NAD+) [EC:1.1.1.8]	GO:0006072//glycerol-3-phosphate metabolic process	GO:0016616//oxidoreductase activity, acting on the CH-OH group of donors, NAD or NADP as acceptor;GO:0048037//cofactor binding;GO:0000166//nucleotide binding	GO:0043234//protein complex;GO:0044444//cytoplasmic part
	Unigene17594	0	0	0	36.29	3.16	4.93	0	0	2.45	4.55	708	96	10.427	gi|192910762|gb|ACF06489.1|	279	3e-74	ribosomal protein L10a [Elaeis guineensis]	sp|Q963B6|RL10A_SPOFR	343	6e-94	60S ribosomal protein L10a OS=Spodoptera frugiperda GN=RpL10A PE=2 SV=1	SPBC30D10.18c	258	9e-69	COG0081	Ribosomal protein L1	K02865	1e-75	279	sbi:SORBI_07g024200	large subUnit ribosomal protein L10Ae	GO:0003002;GO:0010467//gene expression;GO:0048513//organ development	GO:0003676//nucleic acid binding;GO:0005198//structural molecule activity	GO:0015934//large ribosomal subUnit;GO:0016020//membrane
	Unigene17773	1.02	6.89	3.27	4.54	1.43	0.71	0.72	0.66	3.42	12.24	780	42	4.1407	gi|224125708|ref|XP_002329698.1|	403	1e-111	NAC domain protein, IPR003441 [Populus trichocarpa] >gi|222870606|gb|EEF07737.1| NAC domain protein, IPR003441 [Populus trichocarpa]	sp|Q7GCL7|NAC74_ORYSJ	208	4e-53	NAC domain-containing protein 74 OS=Oryza sativa subsp. japonica GN=NAC74 PE=2 SV=1	--	--	--	--	--	--	--	--	--	--	GO:0010468//regulation of gene expression;GO:0032501//multicellular organismal process	GO:0003676//nucleic acid binding	-
	Unigene18051	3.31	99.96	58.41	26.69	9.04	7.47	0.19	0	6.82	13.94	1009	399	30.409	gi|297802310|ref|XP_002869039.1|	354	9e-97	ALDH3F1 [Arabidopsis lyrata subsp. lyrata] >gi|297314875|gb|EFH45298.1| ALDH3F1 [Arabidopsis lyrata subsp. lyrata]	sp|Q70E96|AL3F1_ARATH	352	2e-96	Aldehyde dehydrogenase family 3 member F1 OS=Arabidopsis thaliana GN=ALDH3F1 PE=1 SV=2	alr3672	244	1e-64	COG1012	NAD-dependent aldehyde dehydrogenases	K00128	2e-84	309	osa:4349966	aldehyde dehydrogenase (NAD+) [EC:1.2.1.3]	GO:0044237//cellular metabolic process	GO:0004030//aldehyde dehydrogenase [NAD(P)+] activity;GO:0005488//binding	GO:0043231//intracellular membrane-bounded organelle
	Unigene18083	1.17	23.23	26.98	8.14	2.91	0.17	0.69	0	6.69	15.82	1089	237	16.7356	gi|22655024|gb|AAM98103.1|	363	3e-99	At1g02660/T14P4_9 [Arabidopsis thaliana]	--	--	--	--	--	--	--	--	--	--	--	--	--	--	GO:0044238//primary metabolic process	GO:0004091//carboxylesterase activity	GO:0044464//cell part
	Unigene18129	12.83	25.55	28.35	25.92	12.37	4.14	6.42	8.05	2.07	4.73	2618	682	20.0325	gi|16904543|emb|CAD10740.1|	1314	0	lipoxygenase [Corylus avellana]	sp|Q06327|LOX1_ARATH	1207	0	Lipoxygenase 1 OS=Arabidopsis thaliana GN=LOX1 PE=1 SV=1	--	--	--	--	--	K00454	0	1207	ath:AT1G55020	lipoxygenase [EC:1.13.11.12]	GO:0006633//fatty acid biosynthetic process	GO:0046914//transition metal ion binding;GO:0016702//oxidoreductase activity, acting on single donors with incorporation of molecular oxygen, incorporation of two atoms of oxygen	-
	Unigene18151	15.63	46.33	49.19	35.82	19.66	3.49	8.63	1.41	2.23	4.37	1212	434	27.5364	gi|289540950|gb|ADD09620.1|	395	1e-109	dehydration responsive element binding protein [Trifolium repens]	sp|O65665|ERF60_ARATH	236	2e-61	Ethylene-responsive transcription factor ERF060 OS=Arabidopsis thaliana GN=ERF060 PE=2 SV=1	--	--	--	--	--	K09286	2e-53	206	ath:AT1G78080	EREBP-like factor	GO:0006350//transcription	-	-
	Unigene18377	3.18	10.4	7.93	14.18	3.72	3.68	1.25	0	2.91	5.09	150	4	2.0506	gi|225348627|gb|ACN87275.1|	68.9	2e-11	short chain dehydrogenase/reductase [Nandina domestica]	sp|Q9M2E2|SDR1_ARATH	62.4	8e-10	(+)-neomenthol dehydrogenase OS=Arabidopsis thaliana GN=SDR1 PE=1 SV=1	--	--	--	--	--	--	--	--	--	--	GO:0008152//metabolic process	GO:0016616//oxidoreductase activity, acting on the CH-OH group of donors, NAD or NADP as acceptor	-
	Unigene18417	0	0	1.13	2.36	0	0	0	0	#DIV/0!	#DIV/0!	150	1	0.5127	gi|15217995|ref|NP_175575.1|	55.1	2e-07	ATEXO70G2 (exocyst subUnit EXO70 family protein G2); protein binding [Arabidopsis thaliana]	--	--	--	--	--	--	--	--	--	K07195	9e-09	55.1	ath:AT1G51640	exocyst complex component 7	GO:0048278//vesicle docking	GO:0005488//binding	GO:0044444//cytoplasmic part;GO:0043234//protein complex
	Unigene18537	15.92	38.13	44.16	16.54	11.17	6.13	1.25	5.71	2.07	4.42	150	14	7.1772	gi|42568160|ref|NP_198534.2|	83.6	7e-16	SUS5; UDP-glycosyltransferase/ sucrose synthase [Arabidopsis thaliana]	sp|P13708|SUSY_SOYBN	73.9	3e-13	Sucrose synthase OS=Glycine max GN=SS PE=1 SV=2	--	--	--	--	--	K00695	4e-14	72.8	ath:AT5G20830	sucrose synthase [EC:2.4.1.13]	GO:0005984//disaccharide metabolic process	GO:0035251//UDP-glucosyltransferase activity	GO:0030312//external encapsulating structure
	Unigene18605	0	0	1.13	1.18	0	0	0	0	#DIV/0!	#DIV/0!	150	1	0.5127	gi|124360635|gb|ABN08628.1|	79	2e-14	RNA-directed DNA polymerase (Reverse transcriptase) [Medicago truncatula]	--	--	--	--	--	--	--	--	--	--	--	--	--	--	GO:0006260//DNA replication	GO:0003676//nucleic acid binding;GO:0034061	-
	Unigene18631	28.66	216.05	332.88	152.39	114.19	9.8	37.37	18.27	2.05	4.59	150	176	90.228	gi|256773105|dbj|BAI22477.1|	85.1	2e-16	delta 1-pyrroline-5-carboxylate synthase [Vigna unguiculata]	sp|Q96480|P5CS_SOLLC	73.2	5e-13	Delta-1-pyrroline-5-carboxylate synthase OS=Solanum lycopersicum GN=PRO2 PE=2 SV=1	--	--	--	--	--	K12657	9e-15	75.1	vvi:100232881	delta-1-pyrroline-5-carboxylate synthetase [EC:2.7.2.11 1.2.1.41]	GO:0009725//response to hormone stimulus;GO:0006560//proline metabolic process;GO:0006972//hyperosmotic response;GO:0003006//reproductive developmental process	GO:0016620//oxidoreductase activity, acting on the aldehyde or oxo group of donors, NAD or NADP as acceptor;GO:0016774//phosphotransferase activity, carboxyl group as acceptor;GO:0016646//oxidoreductase activity, acting on the CH-NH group of donors, NAD or NADP as acceptor;GO:0032559//adenyl ribonucleotide binding	GO:0009536//plastid
	Unigene18718	0	1.16	4.53	1.18	0	0	0	0	#DIV/0!	#DIV/0!	150	1	0.5127	gi|92886086|gb|ABE88096.1|	71.2	3e-12	Integrase, catalytic region [Medicago truncatula]	--	--	--	--	--	--	--	--	--	--	--	--	--	--	GO:0006259//DNA metabolic process	GO:0046872//metal ion binding;GO:0003676//nucleic acid binding	-
	Unigene18838	0	0	1.13	1.18	0	0	0	0	#DIV/0!	#DIV/0!	150	1	0.5127	gi|194033217|ref|YP_002000554.1|	78.2	3e-14	orf490 [Oryza sativa Japonica Group] >gi|23495377|dbj|BAC19858.1| orf490 [Oryza sativa Japonica Group]	sp|P92520|M820_ARATH	70.9	2e-12	Uncharacterized mitochondrial protein AtMg00820 OS=Arabidopsis thaliana GN=AtMg00820 PE=4 SV=1	--	--	--	--	--	--	--	--	--	--	GO:0006259//DNA metabolic process;GO:0006325//chromatin organization	GO:0046914//transition metal ion binding;GO:0003676//nucleic acid binding	GO:0044427//chromosomal part;GO:0043231//intracellular membrane-bounded organelle
	Unigene18852	5.31	67.01	132.47	30.71	8.69	8.58	0	0	8.83	16.64	150	56	28.7089	gi|8918273|dbj|BAA97559.1|	103	6e-22	mixed-amyrin synthase [Pisum sativum]	sp|P0C8Y0|LUP3_ARATH	89	8e-18	Camelliol C synthase OS=Arabidopsis thaliana GN=CAMS1 PE=3 SV=1	--	--	--	--	--	K01853	4e-17	82.8	ath:AT1G78960	cycloartenol synthase [EC:5.4.99.8]	GO:0016104//triterpenoid biosynthetic process	GO:0031559//oxidosqualene cyclase activity	-
	Unigene18883	0	1.15	1.12	0	0	0	0	0	#DIV/0!	#DIV/0!	151	1	0.5093	gi|48675345|dbj|BAD22820.1|	85.1	2e-16	nitrate transporter [Prunus persica]	sp|Q05085|CHL1_ARATH	73.9	3e-13	Nitrate/chlorate transporter OS=Arabidopsis thaliana GN=CHL1 PE=1 SV=1	--	--	--	--	--	K03305	1e-10	61.6	ppp:PHYPADRAFT_189464	proton-dependent oligopeptide transporter, POT family	GO:0015698//inorganic anion transport;GO:0015833//peptide transport;GO:0010035//response to inorganic substance;GO:0006950//response to stress	GO:0005488//binding;GO:0015103//inorganic anion transmembrane transporter activity	GO:0031224//intrinsic to membrane
	Unigene18901	2.11	48.2	48.36	32.86	17.26	1.22	0	3.4	2.5	5.42	151	35	17.8242	gi|18411319|ref|NP_565147.1|	91.7	2e-18	SKP2B; ubiquitin-protein ligase [Arabidopsis thaliana] >gi|75318353|sp|O49286.1|FBL5_ARATH RecName: Full=F-box/LRR-repeat protein 5 >gi|2829911|gb|AAC00619.1| Unknown protein [Arabidopsis thaliana] >gi|21593038|gb|AAM64987.1| F-box protein family, AtFBL5 [Arabidopsis thaliana] >gi|89000991|gb|ABD59085.1| At1g77000 [Arabidopsis thaliana]	sp|O49286|FBL5_ARATH	91.7	1e-18	F-box/LRR-repeat protein 5 OS=Arabidopsis thaliana GN=FBL5 PE=2 SV=1	--	--	--	--	--	K03875	9e-20	91.7	ath:AT1G77000	F-box and leucine-rich repeat protein 1 (S-phase kinase-associated protein 2)	GO:0043161//proteasomal ubiquitin-dependent protein catabolic process;GO:0032446//protein modification by small protein conjugation;GO:0009408//response to heat;GO:0048522//positive regulation of cellular process;GO:0009733//response to auxin stimulus;GO:0048527//lateral root development	GO:0005488//binding;GO:0019787//small conjugating protein ligase activity	GO:0043231//intracellular membrane-bounded organelle;GO:0031461//cullin-RING ubiquitin ligase complex
	Unigene18956	92.78	1293.44	1177.6	237.05	187.41	115.65	59.4	0	4.82	11.72	151	484	246.484	gi|186506216|ref|NP_181306.3|	90.1	7e-18	catalytic/ iron ion binding / oxidoreductase [Arabidopsis thaliana]	--	--	--	--	--	--	--	--	--	--	--	--	--	--	GO:0006631//fatty acid metabolic process	GO:0046914//transition metal ion binding;GO:0003824//catalytic activity	GO:0043231//intracellular membrane-bounded organelle;GO:0031224//intrinsic to membrane
	Unigene18973	3.16	83.78	120.35	42.25	3.7	12.17	4.95	31.76	2.59	5.88	151	2	1.0185	gi|118772024|gb|ABL14037.1|	104	4e-22	chalcone synthase 3 [Astragalus mongholicus]	sp|P30076|CHS8_MEDSA	104	2e-22	Chalcone synthase 8 OS=Medicago sativa GN=CHS8 PE=2 SV=1	--	--	--	--	--	K00660	1e-21	98.2	pop:POPTR_554829	chalcone synthase [EC:2.3.1.74]	GO:0009699//phenylpropanoid biosynthetic process	GO:0016747//transferase activity, transferring acyl groups other than amino-acyl groups	-
	Unigene19039	7.38	59.68	67.48	29.34	12.33	13.39	1.24	17.01	3.07	6.86	151	44	22.4076	gi|110931656|gb|ABH02827.1|	69.7	1e-11	MYB transcription factor MYB56 [Glycine max]	sp|Q9SZP1|MYB4_ARATH	68.9	9e-12	Transcription repressor MYB4 OS=Arabidopsis thaliana GN=MYB4 PE=1 SV=1	--	--	--	--	--	K09422	5e-13	69.3	ath:AT2G16720	myb proto-oncogene protein, plant	GO:0009411//response to UV;GO:0009719//response to endogenous stimulus;GO:0010468//regulation of gene expression;GO:0006970//response to osmotic stress;GO:0006351//transcription, DNA-dependent;GO:0010033//response to organic substance	GO:0003676//nucleic acid binding	GO:0043231//intracellular membrane-bounded organelle
	Unigene19061	28.47	192.81	201.33	168.99	34.52	59.65	6.19	0	3.15	6.78	151	52	26.4817	gi|186478915|ref|NP_174028.2|	58.2	3e-08	NRT1.6 (NITRATE TRANSPORTER 1.6); low affinity nitrate transmembrane transporter/ transporter [Arabidopsis thaliana] >gi|161334712|gb|ABX61048.1| nitrate transporter [Arabidopsis thaliana]	--	--	--	--	--	--	--	--	--	--	--	--	--	--	GO:0048856//anatomical structure development;GO:0015706//nitrate transport;GO:0003006//reproductive developmental process;GO:0009791//post-embryonic development;GO:0031669//cellular response to nutrient levels	GO:0015112//nitrate transmembrane transporter activity	GO:0016020//membrane
	Unigene19088	34.79	192.81	163.09	104.44	65.35	12.17	37.13	14.75	2.35	5.63	151	179	91.1583	gi|22327641|ref|NP_199593.2|	89.7	9e-18	FRA1 (FRAGILE FIBER 1); microtubule motor [Arabidopsis thaliana] >gi|30695302|ref|NP_851151.1| FRA1 (FRAGILE FIBER 1); microtubule motor [Arabidopsis thaliana] >gi|27260890|gb|AAN86114.1| kinesin-like protein [Arabidopsis thaliana] >gi|27260892|gb|AAN86115.1| kinesin-like protein [Arabidopsis thaliana]	--	--	--	--	--	--	--	--	--	K10395	5e-12	65.9	vvi:100247280	kinesin family member 4/7/21/27	GO:0007017//microtubule-based process;GO:0030198//extracellular matrix organization	GO:0003774//motor activity;GO:0032559//adenyl ribonucleotide binding	GO:0015630//microtubule cytoskeleton
	Unigene19294	0	2.3	0	0	0	0	0	0	#DIV/0!	#DIV/0!	151	1	0.5093	gi|158828138|gb|ABW81017.1|	72.4	2e-12	gag-pol polymerase [Arabidopsis lyrata subsp. lyrata]	--	--	--	--	--	--	--	--	--	--	--	--	--	--	GO:0006259//DNA metabolic process	GO:0046914//transition metal ion binding;GO:0003676//nucleic acid binding	-
	Unigene19302	0	0	0	1.17	0	0	0	0	#DIV/0!	#DIV/0!	151	1	0.5093	gi|299470498|emb|CBN78489.1|	76.3	1e-13	Tuf1, mitochondrial translation elongation factor EF-Tu [Ectocarpus siliculosus]	sp|Q03F25|EFTU_PEDPA	79.3	7e-15	Elongation factor Tu OS=Pediococcus pentosaceus (strain ATCC 25745 / 183-1w) GN=tuf PE=3 SV=1	MYPU_4050	74.7	4e-14	COG0050	GTPases - translation elongation factors	K02358	1e-12	68.2	ppp:PHYPADRAFT_142425	elongation factor EF-Tu [EC:3.6.5.3]	GO:0006412//translation	GO:0008135//translation factor activity, nucleic acid binding;GO:0032561//guanyl ribonucleotide binding;GO:0017111//nucleoside-triphosphatase activity	GO:0009536//plastid
	Unigene19314	0	0	2.25	0	0	0	0	0	#DIV/0!	#DIV/0!	151	1	0.5093	gi|158828152|gb|ABW81031.1|	71.2	3e-12	LTRGag-pol-polymerase 3 [Arabidopsis lyrata subsp. lyrata]	sp|P92519|M810_ARATH	53.5	4e-07	Uncharacterized mitochondrial protein AtMg00810 OS=Arabidopsis thaliana GN=AtMg00810 PE=4 SV=1	--	--	--	--	--	--	--	--	--	--	GO:0006259//DNA metabolic process	GO:0003676//nucleic acid binding	GO:0043231//intracellular membrane-bounded organelle
	Unigene19342	0	1.15	1.12	1.17	0	0	0	0	#DIV/0!	#DIV/0!	151	1	0.5093	gi|24412857|emb|CAD55555.1|	98.6	2e-20	stachyose synthase [Pisum sativum]	sp|Q93XK2|STSYN_PEA	98.6	1e-20	Stachyose synthase OS=Pisum sativum GN=STS1 PE=1 SV=1	--	--	--	--	--	K06611	2e-07	50.4	ath:AT5G40390	stachyose synthetase [EC:2.4.1.67]	GO:0009311//oligosaccharide metabolic process	GO:0008378//galactosyltransferase activity	GO:0044424//intracellular part
	Unigene19605	107.88	953.15	768.73	466.32	253.55	7.26	46.72	43.95	2.88	6.55	152	283	143.174	gi|211906530|gb|ACJ11758.1|	57.8	4e-08	arabinose kinase [Gossypium hirsutum]	--	--	--	--	--	--	--	--	--	K12446	5e-09	55.8	vvi:100267958	L-arabinokinase [EC:2.7.1.46]	GO:0019321//pentose metabolic process;GO:0016310//phosphorylation;GO:0010467//gene expression;GO:0019318//hexose metabolic process	GO:0016773//phosphotransferase activity, alcohol group as acceptor;GO:0032559//adenyl ribonucleotide binding	GO:0043231//intracellular membrane-bounded organelle
	Unigene19747	90.53	219.74	214.24	137.82	86.4	20.43	69.62	26.87	2.11	3.99	153	85	42.7216	gi|37196706|dbj|BAC97801.1|	102	1e-21	RelA-SpoT like protein PsRSH1 [Pisum sativum]	sp|P74007|SPOT_SYNY3	67.8	2e-11	Probable guanosine-3',5'-bis(diphosphate) 3'-pyrophosphohydrolase OS=Synechocystis sp. (strain PCC 6803) GN=spoT PE=3 SV=1	lin1558	70.5	7e-13	COG0317	Guanosine polyphosphate pyrophosphohydrolases/synthetases	--	--	--	--	--	GO:0008617//guanosine metabolic process	GO:0016794	GO:0043231//intracellular membrane-bounded organelle;GO:0031410//cytoplasmic vesicle
	Unigene19965	1.03	271.2	393.71	121.97	43.52	0	2.43	0	6.03	13.24	154	104	51.9317	gi|224093842|ref|XP_002310016.1|	67.4	5e-11	cytochrome P450 [Populus trichocarpa] >gi|222852919|gb|EEE90466.1| cytochrome P450 [Populus trichocarpa]	--	--	--	--	--	--	--	--	--	--	--	--	--	--	GO:0008152//metabolic process	GO:0016709//oxidoreductase activity, acting on paired donors, with incorporation or reduction of molecular oxygen, NADH or NADPH as one donor, and incorporation of one atom of oxygen;GO:0005506//iron ion binding	-
	Unigene20272	82.17	219.14	192.85	142.9	61.26	1.19	51.84	17.68	2.25	4.32	155	142	70.4493	gi|115478126|ref|NP_001062658.1|	54.3	4e-07	Os09g0245500 [Oryza sativa Japonica Group] >gi|113630891|dbj|BAF24572.1| Os09g0245500 [Oryza sativa Japonica Group]	--	--	--	--	--	--	--	--	--	K06892	2e-08	54.3	osa:4346490		GO:0008152//metabolic process	GO:0016491//oxidoreductase activity;GO:0046914//transition metal ion binding	-
	Unigene20341	0	3.35	4.38	0	0	0	1.21	0	2.14	4.34	155	2	0.9922	gi|255641569|gb|ACU21058.1|	62	2e-09	unknown [Glycine max]	--	--	--	--	--	--	--	--	--	--	--	--	--	--	GO:0010468//regulation of gene expression;GO:0006350//transcription	-	-
	Unigene20389	60.6	533.32	599.35	260.66	105.7	2.37	31.35	35.36	4.39	10.77	155	454	225.239	gi|222424859|dbj|BAH20381.1|	81.6	2e-15	AT4G16130 [Arabidopsis thaliana]	--	--	--	--	--	--	--	--	--	K12446	4e-17	82.8	vvi:100267958	L-arabinokinase [EC:2.7.1.46]	GO:0019321//pentose metabolic process;GO:0010467//gene expression;GO:0006796//phosphate metabolic process	GO:0016773//phosphotransferase activity, alcohol group as acceptor;GO:0032559//adenyl ribonucleotide binding	GO:0044424//intracellular part
	Unigene20398	0	99.51	95.33	14.86	0	0	19.29	1.11	3.62	7.73	155	36	17.8604	gi|84514147|gb|ABC59082.1|	88.2	3e-17	cytochrome P450 monooxygenase CYP83E8 [Medicago truncatula]	sp|O81970|C71A9_SOYBN	55.8	8e-08	Cytochrome P450 71A9 OS=Glycine max GN=CYP71A9 PE=2 SV=1	--	--	--	--	--	K00517	9e-07	48.5	ath:AT5G57260	[EC:1.14.-.-]	GO:0008152//metabolic process	GO:0004497//monooxygenase activity;GO:0005506//iron ion binding	-
	Unigene20535	15.31	404.37	468.14	179.47	9.55	64.81	1.2	3.29	5.41	12.62	156	103	50.773	gi|293628085|gb|ADE58495.1|	91.7	2e-18	chalcone synthase [PUnica granatum]	sp|P51089|CHSY_VIGUN	91.7	1e-18	Chalcone synthase OS=Vigna unguiculata GN=CHS PE=2 SV=1	--	--	--	--	--	K00660	9e-20	91.7	pop:POPTR_814871	chalcone synthase [EC:2.3.1.74]	GO:0008152//metabolic process	GO:0016747//transferase activity, transferring acyl groups other than amino-acyl groups	-
	Unigene20630	20.41	123.31	103.43	63.61	26.26	3.54	16.77	29.64	3.26	7.64	156	51	25.14	gi|21355055|dbj|BAC00778.1|	105	2e-22	3-methylcrotonyl CoA carboxylase [Pisum sativum]	sp|Q42777|MCCA_SOYBN	94.7	2e-19	Methylcrotonoyl-CoA carboxylase subUnit alpha, mitochondrial OS=Glycine max GN=MCCA PE=1 SV=2	BH2787	69.3	2e-12	COG0439	Biotin carboxylase	K01968	1e-20	94.7	sbi:SORBI_08g020810	3-methylcrotonyl-CoA carboxylase alpha subUnit [EC:6.4.1.4]	GO:0006551//leucine metabolic process;GO:0006464//protein modification process	GO:0019842//vitamin binding;GO:0004672//protein kinase activity;GO:0046914//transition metal ion binding;GO:0016421//CoA carboxylase activity;GO:0032559//adenyl ribonucleotide binding	GO:0031980//mitochondrial lumen;GO:0005840//ribosome
	Unigene20666	61.23	351.05	274.35	135.17	64.45	38.89	23.96	48.31	3.93	12.41	156	142	69.9977	gi|224114089|ref|XP_002316664.1|	76.3	1e-13	f-box family protein [Populus trichocarpa] >gi|222859729|gb|EEE97276.1| f-box family protein [Populus trichocarpa]	sp|Q570C0|TIR1_ARATH	61.6	1e-09	Protein TRANSPORT INHIBITOR RESPONSE 1 OS=Arabidopsis thaliana GN=TIR1 PE=1 SV=2	--	--	--	--	--	--	--	--	--	--	GO:0010102//lateral root morphogenesis;GO:0048437//floral organ development;GO:0009267//cellular response to starvation;GO:0019941//modification-dependent protein catabolic process;GO:0009755//hormone-mediated signaling pathway;GO:0009555//pollen development;GO:0009607//response to biotic stimulus	GO:0042562//hormone binding;GO:0043178//alcohol binding;GO:0019787//small conjugating protein ligase activity	GO:0031461//cullin-RING ubiquitin ligase complex
	Unigene21389	2	14.17	22.43	5.57	1.17	2.31	0	0	6.08	11.94	159	21	10.1565	gi|166835923|gb|ABY90133.1|	58.9	2e-08	geranyl-diphosphate synthase [Glycine max]	--	--	--	--	--	--	--	--	--	--	--	--	--	--	GO:0006720//isoprenoid metabolic process	GO:0004659//prenyltransferase activity	-
	Unigene21394	0	3.27	1.07	0	0	0	0	0	#DIV/0!	#DIV/0!	159	2	0.9673	gi|6850900|emb|CAB71063.1|	74.7	3e-13	copia-type polyprotein [Arabidopsis thaliana]	sp|P10978|POLX_TOBAC	50.8	3e-06	Retrovirus-related Pol polyprotein from transposon TNT 1-94 OS=Nicotiana tabacum PE=2 SV=1	--	--	--	--	--	--	--	--	--	--	GO:0006259//DNA metabolic process	GO:0046914//transition metal ion binding;GO:0003676//nucleic acid binding	-
	Unigene21557	11.94	588.14	672.97	202.67	4.65	1.15	0	0	40.86	95.65	160	461	221.565	gi|226374636|gb|ACO52470.1|	77.4	5e-14	anthocyanin 2 [Nicotiana tabacum] >gi|226374638|gb|ACO52471.1| anthocyanin 2 [Nicotiana tomentosiformis] >gi|226374641|gb|ACO52472.1| anthocyanin 2 [Nicotiana tabacum] >gi|226374643|gb|ACO52473.1| anthocyanin 2 [Nicotiana tomentosiformis]	sp|Q9FNV9|MY113_ARATH	63.5	4e-10	Transcription factor MYB113 OS=Arabidopsis thaliana GN=MYB113 PE=1 SV=1	--	--	--	--	--	K09422	3e-11	63.5	ath:AT1G66370	myb proto-oncogene protein, plant	GO:0010468//regulation of gene expression	GO:0003676//nucleic acid binding	GO:0043231//intracellular membrane-bounded organelle
	Unigene21617	16.92	126.73	123.13	49.84	30.25	2.3	11.68	24.62	3.3	7.57	160	69	33.1626	gi|19570308|dbj|BAB86281.1|	102	1e-21	3-methylcrotonyl CoA carboxylase [Pisum sativum]	sp|Q42777|MCCA_SOYBN	94	3e-19	Methylcrotonoyl-CoA carboxylase subUnit alpha, mitochondrial OS=Glycine max GN=MCCA PE=1 SV=2	SMb21124	63.5	9e-11	COG4770	Acetyl/propionyl-CoA carboxylase, alpha subUnit	K01968	3e-19	90.1	rcu:RCOM_0646250	3-methylcrotonyl-CoA carboxylase alpha subUnit [EC:6.4.1.4]	GO:0006551//leucine metabolic process;GO:0006464//protein modification process	GO:0019842//vitamin binding;GO:0004672//protein kinase activity;GO:0046914//transition metal ion binding;GO:0016421//CoA carboxylase activity;GO:0032559//adenyl ribonucleotide binding	GO:0031980//mitochondrial lumen;GO:0005840//ribosome
	Unigene21745	11.08	39.49	50.52	22.43	10.61	0	11.83	4.34	3.17	5.77	158	34	16.5479	gi|9945083|gb|AAG03120.1|AC004133_14	60.1	8e-09	F5A9.23 [Arabidopsis thaliana]	sp|P43298|TMK1_ARATH	59.3	7e-09	Probable receptor protein kinase TMK1 OS=Arabidopsis thaliana GN=TMK1 PE=1 SV=1	--	--	--	--	--	K00924	3e-10	60.1	ath:AT1G24650	[EC:2.7.1.-]	GO:0009987//cellular process	GO:0004702//receptor signaling protein serine/threonine kinase activity;GO:0004713//protein tyrosine kinase activity;GO:0000166//nucleotide binding	GO:0016020//membrane
	Unigene21776	39.8	111.56	91.29	75.31	37.24	12.64	43.21	38.54	2.15	4.75	160	69	33.1626	gi|167047943|gb|ABZ10818.1|	105	1e-22	ornithine aminotransferase [Pisum sativum]	sp|Q92413|OAT_EMENI	82	1e-15	Ornithine aminotransferase OS=Emericella nidulans GN=otaA PE=3 SV=2	SPBC21C3.08c	80.1	9e-16	COG4992	Ornithine/acetylornithine aminotransferase	K00819	2e-20	94	zma:100191445	ornithine--oxo-acid transaminase [EC:2.6.1.13]	GO:0006527//arginine catabolic process;GO:0006591//ornithine metabolic process;GO:0006972//hyperosmotic response;GO:0006560//proline metabolic process	GO:0008483//transaminase activity;GO:0046914//transition metal ion binding;GO:0048037//cofactor binding	GO:0043231//intracellular membrane-bounded organelle
	Unigene22437	54.69	398.7	335.5	161.98	43.4	2.26	17.2	15.76	5.46	12.58	163	101	47.649	gi|222424859|dbj|BAH20381.1|	88.2	3e-17	AT4G16130 [Arabidopsis thaliana]	--	--	--	--	--	--	--	--	--	K12446	1e-18	88.2	ath:AT4G16130	L-arabinokinase [EC:2.7.1.46]	GO:0019321//pentose metabolic process;GO:0010467//gene expression;GO:0006796//phosphate metabolic process	GO:0016773//phosphotransferase activity, alcohol group as acceptor;GO:0032559//adenyl ribonucleotide binding	GO:0043231//intracellular membrane-bounded organelle
	Unigene22513	0	1.06	2.08	1.09	0	0	0	0	#DIV/0!	#DIV/0!	163	2	0.9435	gi|224101511|ref|XP_002312310.1|	80.1	7e-15	gibberellin 2-oxidase [Populus trichocarpa] >gi|222852130|gb|EEE89677.1| gibberellin 2-oxidase [Populus trichocarpa]	sp|Q9XHM5|G2OX2_PEA	64.7	2e-10	Gibberellin 2-beta-dioxygenase 2 OS=Pisum sativum GN=GA2OX2 PE=2 SV=1	--	--	--	--	--	K04125	2e-07	50.8	ath:AT1G78440	gibberellin 2-oxidase [EC:1.14.11.13]	GO:0009685	GO:0046872//metal ion binding;GO:0016706//oxidoreductase activity, acting on paired donors, with incorporation or reduction of molecular oxygen, 2-oxoglutarate as one donor, and incorporation of one atom each of oxygen into both donors	-
	Unigene22562	0	0	1.04	1.09	0	0	0	0	#DIV/0!	#DIV/0!	163	1	0.4718	gi|8918273|dbj|BAA97559.1|	116	7e-26	mixed-amyrin synthase [Pisum sativum]	sp|B6EXY6|LUP4_ARATH	100	3e-21	Beta-amyrin synthase OS=Arabidopsis thaliana GN=BAS PE=2 SV=2	--	--	--	--	--	K01853	3e-19	90.1	ath:AT1G78960	cycloartenol synthase [EC:5.4.99.8]	GO:0016104//triterpenoid biosynthetic process	GO:0031559//oxidosqualene cyclase activity	-
	Unigene22644	0.97	11.62	6.21	7.56	3.41	0	1.14	1.04	2.49	5.69	164	2	0.9378	gi|3914361|sp|P93400.2|PLDA1_TOBAC	103	8e-22	RecName: Full=Phospholipase D alpha 1; Short=PLD alpha 1; AltName: Full=Choline phosphatase 1; AltName: Full=Phosphatidylcholine-hydrolyzing phospholipase D 1 >gi|2281951|emb|CAB06620.1| phospholipase D [Nicotiana tabacum]	sp|P93400|PLDA1_TOBAC	103	4e-22	Phospholipase D alpha 1 OS=Nicotiana tabacum GN=PLD1 PE=2 SV=2	--	--	--	--	--	K01115	8e-21	95.1	osa:4327647	phospholipase D [EC:3.1.4.4]	GO:0006650//glycerophospholipid metabolic process	GO:0046872//metal ion binding;GO:0004620//phospholipase activity	GO:0044464//cell part
	Unigene22660	0	94.05	191.58	42.14	46.55	0	0	7.31	2.35	4.86	164	83	38.9183	gi|186531069|ref|NP_001119410.1|	72.4	1e-12	metal ion binding [Arabidopsis thaliana]	--	--	--	--	--	--	--	--	--	--	--	--	--	--	GO:0006812//cation transport	GO:0043169//cation binding	-
	Unigene22699	0	2.11	1.04	0	0	0	0	0	#DIV/0!	#DIV/0!	164	2	0.9378	gi|254971800|gb|ACT98135.1|	64.7	3e-10	TNP2 [Glycine max]	--	--	--	--	--	--	--	--	--	--	--	--	--	--	GO:0044238//primary metabolic process;GO:0043170	-	-
	Unigene22815	103.87	380.42	343.81	150.19	62.44	11.21	38.74	38.64	2.81	6.93	164	233	109.253	gi|146674837|gb|ABQ42350.1|	77.4	5e-14	trihelix transcription factor [Glycine max]	--	--	--	--	--	--	--	--	--	--	--	--	--	--	GO:0010468//regulation of gene expression	GO:0003676//nucleic acid binding	-
	Unigene22819	31.06	25.36	8.28	197.73	4.54	28.02	1.14	0	2.48	4.2	164	51	23.9137	gi|18146825|dbj|BAB82471.1|	72.4	1e-12	chitinase 1 [Triticum aestivum]	sp|P85084|CHIT_CARPA	69.3	7e-12	Endochitinase OS=Carica papaya PE=1 SV=1	--	--	--	--	--	K01183	7e-12	65.5	ath:AT3G12500	chitinase [EC:3.2.1.14]	GO:0050896//response to stimulus;GO:0006026	GO:0004553//hydrolase activity, hydrolyzing O-glycosyl compounds;GO:0030247//polysaccharide binding	GO:0005576//extracellular region
	Unigene22841	7.77	58.12	54.89	34.58	12.49	12.33	7.98	2.09	3.94	9.55	164	23	10.7846	gi|297829000|ref|XP_002882382.1|	109	8e-24	WNK1 [Arabidopsis lyrata subsp. lyrata] >gi|297328222|gb|EFH58641.1| WNK1 [Arabidopsis lyrata subsp. lyrata]	sp|Q9CAV6|WNK1_ARATH	109	5e-24	Serine/threonine-protein kinase WNK1 OS=Arabidopsis thaliana GN=WNK1 PE=1 SV=1	--	--	--	--	--	K12132	3e-24	106	pop:POPTR_1096507	serine/threonine-protein kinase WNK1 [EC:2.7.11.1]	GO:0006464//protein modification process;GO:0048511//rhythmic process	GO:0004702//receptor signaling protein serine/threonine kinase activity;GO:0032559//adenyl ribonucleotide binding	GO:0044464//cell part
	Unigene22908	80.08	255.22	179.1	155.72	71.09	49.02	63.42	40.48	2.46	8.44	165	83	38.6825	gi|117940159|sp|P93051.2|ERDL7_ARATH	94.4	4e-19	RecName: Full=Sugar transporter ERD6-like 7	sp|P93051|ERDL7_ARATH	94.4	2e-19	Sugar transporter ERD6-like 7 OS=Arabidopsis thaliana GN=At2g48020 PE=2 SV=2	--	--	--	--	--	--	--	--	--	--	GO:0006810//transport;GO:0008152//metabolic process	GO:0022891//substrate-specific transmembrane transporter activity;GO:0016628//oxidoreductase activity, acting on the CH-CH group of donors, NAD or NADP as acceptor	GO:0031224//intrinsic to membrane;GO:0009536//plastid
	Unigene22939	13.51	95.58	100.87	55.85	25.95	23.4	13.59	35.29	2.38	6.73	165	73	34.0219	gi|217071190|gb|ACJ83955.1|	72	2e-12	unknown [Medicago truncatula]	--	--	--	--	--	--	--	--	--	K01246	1e-13	71.2	pop:POPTR_1084717	DNA-3-methyladenine glycosylase I [EC:3.2.2.20]	GO:0006281//DNA repair	GO:0003905//alkylbase DNA N-glycosylase activity	-
	Unigene23007	192.01	773.03	599.06	407.03	104.94	43.45	3.4	2.08	3.09	6.52	165	215	100.202	gi|15077028|gb|AAK83035.1|AF286650_1	80.1	7e-15	CTA [Cucumis sativus]	sp|Q7FAE1|MOMAS_ORYSJ	66.6	4e-11	Momilactone A synthase OS=Oryza sativa subsp. japonica GN=Os04g0179200 PE=2 SV=1	--	--	--	--	--	K13070	3e-12	66.6	osa:4335093	momilactone-A synthase [EC:1.1.1.295]	GO:0008152//metabolic process	GO:0004312//fatty-acid synthase activity	-
	Unigene23029	1.93	120.79	9.26	16.11	22.57	0	9.06	0	2.16	4.37	165	59	27.4972	gi|2293112|emb|CAA71598.1|	97.1	6e-20	potassium channel [Vicia faba]	--	--	--	--	--	--	--	--	--	--	--	--	--	--	GO:0030001//metal ion transport	GO:0005267//potassium channel activity	GO:0031224//intrinsic to membrane
	Unigene23071	57.89	661.69	745.22	401.66	180.54	4.46	96.27	53.98	3.34	7.99	165	289	134.69	gi|113204693|gb|ABI34093.1|	98.6	2e-20	homocysteine S-methyltransferase [Medicago sativa]	sp|Q9FUM9|HMT2_MAIZE	84.3	2e-16	Homocysteine S-methyltransferase 2 OS=Zea mays GN=HMT-2 PE=2 SV=1	yagD	53.9	7e-08	COG2040	Homocysteine/selenocysteine methylase (S-methylmethionine-dependent)	K00547	5e-18	85.9	pop:POPTR_658494	homocysteine S-methyltransferase [EC:2.1.1.10]	GO:0000097//sulfur amino acid biosynthetic process	GO:0043169//cation binding;GO:0008172//S-methyltransferase activity	-
	Unigene23183	1.92	11.48	29.67	4.27	5.61	1.11	0	0	2.7	5.79	166	7	3.2427	gi|1705840|sp|P51081.1|CHSA_PEA	82.4	1e-15	RecName: Full=Chalcone synthase 1A; AltName: Full=Naringenin-chalcone synthase 1A >gi|510543|emb|CAA56316.1| naringenin-chalcone synthase [Pisum sativum]	sp|P51081|CHSA_PEA	82.4	8e-16	Chalcone synthase 1A OS=Pisum sativum GN=CHS-1A PE=3 SV=1	--	--	--	--	--	K00660	2e-15	77	pop:POPTR_814871	chalcone synthase [EC:2.3.1.74]	GO:0009699//phenylpropanoid biosynthetic process	GO:0016747//transferase activity, transferring acyl groups other than amino-acyl groups	-
	Unigene23429	77.22	281.22	367.13	215.4	134.9	18.71	21.26	3.08	2.13	4.33	167	216	99.462	gi|156713219|dbj|BAF76352.1|	121	2e-27	senescence-inducible chloroplast stay-green protein [Pisum sativum] >gi|157888393|emb|CAP04955.2| senescence-inducible chloroplast stay-green protein [Pisum sativum]	--	--	--	--	--	--	--	--	--	--	--	--	--	--	GO:0006787	-	GO:0009536//plastid
	Unigene23472	0	0	0	16.98	0	0	1.12	0	5.06	10.86	167	2	0.9209	gi|227202678|dbj|BAH56812.1|	65.5	2e-10	AT5G13750 [Arabidopsis thaliana]	--	--	--	--	--	--	--	--	--	--	--	--	--	--	GO:0006810//transport;GO:0042221//response to chemical stimulus	-	-
	Unigene23521	45.76	456.6	504.42	216.46	112.6	13.21	21.26	113.85	3.45	6.78	167	287	132.156	gi|225457658|ref|XP_002275562.1|	80.9	4e-15	PREDICTED: similar to cinnamoyl-CoA reductase family [Vitis vinifera]	--	--	--	--	--	--	--	--	--	K09753	4e-09	56.2	osa:4345689	cinnamoyl-CoA reductase [EC:1.2.1.44]	GO:0009699//phenylpropanoid biosynthetic process;GO:0010038//response to metal ion	GO:0016620//oxidoreductase activity, acting on the aldehyde or oxo group of donors, NAD or NADP as acceptor;GO:0016616//oxidoreductase activity, acting on the CH-OH group of donors, NAD or NADP as acceptor;GO:0048037//cofactor binding	-
	Unigene23533	3.81	105.85	8.14	3.18	1.11	0	0	0	10.24	23.03	167	53	24.405	gi|21553402|gb|AAM62495.1|	110	5e-24	protein kinase [Arabidopsis thaliana]	sp|O80397|M2K4_ARATH	62.4	8e-10	Mitogen-activated protein kinase kinase 4 OS=Arabidopsis thaliana GN=MKK4 PE=1 SV=1	YAR019c	52.8	2e-07	COG0515	Serine/threonine protein kinase	K13413	4e-11	63.2	rcu:RCOM_0727440	mitogen-activated protein kinase kinase 4/5, plant [EC:2.7.12.2]	GO:0006464//protein modification process	GO:0004713//protein tyrosine kinase activity;GO:0032559//adenyl ribonucleotide binding	GO:0016020//membrane
	Unigene23553	0	2.08	12.2	0	2.23	0	0	0	2.13	4.33	167	3	1.3814	gi|15418778|gb|AAK37761.1|	96.7	7e-20	zinc transporter protein ZIP1 [Glycine max]	sp|O81123|ZIP1_ARATH	79	9e-15	Zinc transporter 1 OS=Arabidopsis thaliana GN=ZIP1 PE=2 SV=1	--	--	--	--	--	--	--	--	--	--	GO:0008152//metabolic process;GO:0000041//transition metal ion transport	GO:0015082//di-, tri-valent inorganic cation transmembrane transporter activity;GO:0016628//oxidoreductase activity, acting on the CH-CH group of donors, NAD or NADP as acceptor	GO:0031224//intrinsic to membrane;GO:0031410//cytoplasmic vesicle
	Unigene23555	0.95	7.26	1.02	6.37	1.11	0	0	0	4.38	7.85	167	8	3.6838	gi|212525794|gb|ACJ26768.1|	104	4e-22	MADS-13 [Gossypium hirsutum]	sp|Q6EU39|MADS6_ORYSJ	103	4e-22	MADS-box transcription factor 6 OS=Oryza sativa subsp. japonica GN=MADS6 PE=1 SV=1	YPL089c	58.9	2e-09	COG5068	Regulator of arginine metabolism and related MADS box-containing transcription factors	K09264	7e-23	102	ath:AT2G45650	MADS-box transcription factor, plant	GO:0010468//regulation of gene expression;GO:0006351//transcription, DNA-dependent	GO:0003677//DNA binding	GO:0043231//intracellular membrane-bounded organelle
	Unigene23600	14.3	284.34	363.06	166.59	24.53	3.3	1.12	31.79	8.53	19.34	167	254	116.96	gi|2076884|gb|AAB53975.1|	103	8e-22	lysine-ketoglutarate reductase/saccharopine dehydrogenase [Arabidopsis thaliana]	sp|Q9SMZ4|AASS_ARATH	103	4e-22	Alpha-aminoadipic semialdehyde synthase OS=Arabidopsis thaliana GN=LKR/SDH PE=1 SV=1	--	--	--	--	--	--	--	--	--	--	GO:0008152//metabolic process	GO:0004753//saccharopine dehydrogenase activity	GO:0043231//intracellular membrane-bounded organelle
	Unigene23655	3.81	6.23	10.17	9.55	2.23	3.3	1.12	2.05	2.27	5.76	167	5	2.3024	gi|42565162|ref|NP_189089.3|	73.2	9e-13	TMS membrane family protein / tumour differentially expressed (TDE) family protein [Arabidopsis thaliana] >gi|17381270|gb|AAL36053.1| AT3g24470/MXP5_4 [Arabidopsis thaliana] >gi|37201996|gb|AAQ89613.1| At3g24470/MXP5_4 [Arabidopsis thaliana]	--	--	--	--	--	--	--	--	--	--	--	--	--	--	GO:0003006//reproductive developmental process	-	GO:0044464//cell part
	Unigene24056	15.07	72.81	69.34	3.15	1.1	0	8.85	0	3.21	6.45	169	19	8.6454	gi|152925784|gb|ABS32110.1|	94	5e-19	aldehyde oxidase 3 [Pisum sativum]	sp|Q7G192|ALDO2_ARATH	58.9	9e-09	Aldehyde oxidase 2 OS=Arabidopsis thaliana GN=AAO2 PE=1 SV=2	--	--	--	--	--	K00106	2e-11	63.9	sbi:SORBI_01g005670	xanthine dehydrogenase/oxidase [EC:1.17.1.4 1.17.3.2]	GO:0009850//auxin metabolic process	GO:0030554//adenyl nucleotide binding;GO:0016726//oxidoreductase activity, acting on CH or CH2 groups, NAD or NADP as acceptor;GO:0046914//transition metal ion binding;GO:0051536//iron-sulfur cluster binding;GO:0016623	-
	Unigene24206	73.98	393.49	376.64	200.13	124.85	10.81	46.17	82.62	2.59	6.02	170	129	58.3527	gi|19570308|dbj|BAB86281.1|	120	4e-27	3-methylcrotonyl CoA carboxylase [Pisum sativum]	sp|Q42777|MCCA_SOYBN	110	3e-24	Methylcrotonoyl-CoA carboxylase subUnit alpha, mitochondrial OS=Glycine max GN=MCCA PE=1 SV=2	--	--	--	--	--	K01968	2e-20	93.6	vvi:100251183	3-methylcrotonyl-CoA carboxylase alpha subUnit [EC:6.4.1.4]	GO:0006551//leucine metabolic process	GO:0019842//vitamin binding;GO:0046914//transition metal ion binding;GO:0016421//CoA carboxylase activity;GO:0032559//adenyl ribonucleotide binding	GO:0031980//mitochondrial lumen;GO:0005840//ribosome
	Unigene2424	1.65	23.55	17.09	42.46	4.25	5.91	0.39	0	4.69	9.89	964	209	16.6721	gi|87162933|gb|ABD28728.1|	306	3e-82	Pathogenesis-related transcriptional factor and ERF [Medicago truncatula]	sp|Q9XI33|WIN1_ARATH	241	7e-63	Ethylene-responsive transcription factor WIN1 OS=Arabidopsis thaliana GN=WIN1 PE=2 SV=1	--	--	--	--	--	K09286	4e-19	92.4	ath:AT1G78080	EREBP-like factor	GO:0000160//two-component signal transduction system (phosphorelay);GO:0006633//fatty acid biosynthetic process;GO:0010468//regulation of gene expression;GO:0006351//transcription, DNA-dependent;GO:0006950//response to stress	GO:0003677//DNA binding	GO:0043231//intracellular membrane-bounded organelle
	Unigene24443	34.45	121.61	116.2	21.76	9.8	0	4.37	2	2.51	5.43	171	45	20.2365	gi|152925780|gb|ABS32108.1|	102	1e-21	aldehyde oxidase 1 [Pisum sativum]	sp|Q7G191|ALDO4_ARATH	75.9	7e-14	Aldehyde oxidase 4 OS=Arabidopsis thaliana GN=AAO4 PE=2 SV=2	--	--	--	--	--	K09842	1e-13	71.6	ath:AT2G27150	abscisic-aldehyde oxidase [EC:1.2.3.14]	GO:0009687//abscisic acid metabolic process;GO:0019757	GO:0030554//adenyl nucleotide binding;GO:0051536//iron-sulfur cluster binding;GO:0018488//aryl-aldehyde oxidase activity;GO:0046914//transition metal ion binding;GO:0019899//enzyme binding;GO:0019115//benzaldehyde dehydrogenase activity	GO:0044444//cytoplasmic part
	Unigene24457	12.1	101.35	149.97	66.32	26.13	3.23	15.3	5.01	4.05	10.21	171	130	58.4611	gi|164564394|gb|ABY61079.1|	79.3	1e-14	pyrroline-5-carboxylate synthetase [Phaseolus vulgaris]	sp|O04015|P5CS_ACTDE	71.6	1e-12	Delta-1-pyrroline-5-carboxylate synthase OS=Actinidia deliciosa PE=2 SV=1	--	--	--	--	--	K12657	1e-15	77.8	vvi:100266504	delta-1-pyrroline-5-carboxylate synthetase [EC:2.7.2.11 1.2.1.41]	GO:0006560//proline metabolic process	GO:0016620//oxidoreductase activity, acting on the aldehyde or oxo group of donors, NAD or NADP as acceptor;GO:0016774//phosphotransferase activity, carboxyl group as acceptor	GO:0044424//intracellular part
	Unigene24462	0	0	0	3.11	0	0	0	0	#DIV/0!	#DIV/0!	171	2	0.8994	gi|226494853|ref|NP_001151625.1|	70.9	4e-12	LOC100285259 [Zea mays] >gi|194740440|gb|ACF94691.1| starch phosphorylase 2 precursor [Zea mays] >gi|195648184|gb|ACG43560.1| alpha-glucan phosphorylase, H isozyme [Zea mays]	sp|Q9XTL9|PYG_DROME	89.4	6e-18	Glycogen phosphorylase OS=Drosophila melanogaster GN=GlyP PE=2 SV=2	slr1367	67	8e-12	COG0058	Glucan phosphorylase	K00688	9e-15	75.1	olu:OSTLU_14998	starch phosphorylase [EC:2.4.1.1]	GO:0044238//primary metabolic process	GO:0016758//transferase activity, transferring hexosyl groups;GO:0048037//cofactor binding	-
	Unigene24533	0	0	0	15.54	0	0	0	0	#DIV/0!	#DIV/0!	171	2	0.8994	gi|32400796|gb|AAP80630.1|AF475108_1	62.8	1e-09	acidic ribosomal protein [Triticum aestivum]	sp|P02399|RLA2_ARTSA	71.6	1e-12	60S acidic ribosomal protein P2 OS=Artemia salina PE=1 SV=1	SPAC1071.08	66.2	1e-11	COG2058	Ribosomal protein L12E/L44/L45/RPP1/RPP2	K02943	1e-11	64.7	rcu:RCOM_0792560	large subUnit ribosomal protein LP2	GO:0006412//translation	-	GO:0005622//intracellular
	Unigene2455	1.55	5.92	6.63	12.1	1.82	0	1.82	0	4.51	7.52	205	7	2.6258	gi|18401444|ref|NP_565652.1|	87.4	4e-17	glycosyl hydrolase family 17 protein [Arabidopsis thaliana] >gi|75216237|sp|Q9ZQG9.2|E1314_ARATH RecName: Full=Glucan endo-1,3-beta-glucosidase 14; AltName: Full=(1->3)-beta-glucan endohydrolase 14; Short=(1->3)-beta-glucanase 14; AltName: Full=Beta-1,3-endoglucanase 14; Short=Beta-1,3-glucanase 14; Flags: Precursor	sp|Q9ZQG9|E1314_ARATH	87.4	2e-17	Glucan endo-1,3-beta-glucosidase 14 OS=Arabidopsis thaliana GN=At2g27500/F10A12.18 PE=1 SV=2	--	--	--	--	--	--	--	--	--	--	GO:0044238//primary metabolic process	GO:0043167//ion binding;GO:0008422//beta-glucosidase activity	GO:0031225//anchored to membrane;GO:0043231//intracellular membrane-bounded organelle
	Unigene24601	0	0	0	4.15	0	0	0	0	#DIV/0!	#DIV/0!	171	3	1.3491	gi|255070073|ref|XP_002507118.1|	57.4	5e-08	heat shock binding protein 70, ER luminal [Micromonas sp. RCC299] >gi|226522393|gb|ACO68376.1| heat shock binding protein 70, ER luminal [Micromonas sp. RCC299]	sp|Q03685|BIP5_TOBAC	56.6	5e-08	Luminal-binding protein 5 OS=Nicotiana tabacum GN=BIP5 PE=2 SV=1	SPAC22A12.15c	48.9	2e-06	COG0443	Molecular chaperone	K09490	6e-09	55.8	osa:4328075	heat shock 70kDa protein 5	GO:0050896//response to stimulus	GO:0032559//adenyl ribonucleotide binding	GO:0031410//cytoplasmic vesicle;GO:0005783//endoplasmic reticulum
	Unigene24641	29.79	88.17	88.39	44.56	11.98	9.68	31.69	6.01	2.33	4.66	171	161	72.4019	gi|25986771|gb|AAM55297.1|	112	1e-24	auxin efflux carrier protein [Medicago truncatula]	sp|Q8RWZ6|PIN4_ARATH	103	3e-22	Auxin efflux carrier component 4 OS=Arabidopsis thaliana GN=PIN4 PE=1 SV=1	--	--	--	--	--	K13947	6e-16	79	osa:4326565	auxin efflux carrier family	GO:0048513//organ development	GO:0015294//solute:cation symporter activity	GO:0031224//intrinsic to membrane
	Unigene24643	3.72	202.69	272.13	41.45	0	0	57.92	0	2.97	6.26	171	110	49.4671	gi|84514147|gb|ABC59082.1|	95.9	1e-19	cytochrome P450 monooxygenase CYP83E8 [Medicago truncatula]	sp|O64718|C71B9_ARATH	69.7	5e-12	Cytochrome P450 71B9 OS=Arabidopsis thaliana GN=CYP71B9 PE=2 SV=3	--	--	--	--	--	K00517	6e-13	68.9	ath:AT5G25140	[EC:1.14.-.-]	GO:0008152//metabolic process	GO:0016491//oxidoreductase activity;GO:0005506//iron ion binding	-
	Unigene24702	19.44	171.29	203.41	191.62	37.89	0	6.52	0	4.98	10.91	172	113	50.5208	gi|115453313|ref|NP_001050257.1|	70.9	4e-12	Os03g0386800 [Oryza sativa Japonica Group] >gi|113548728|dbj|BAF12171.1| Os03g0386800 [Oryza sativa Japonica Group]	sp|P52711|CBP23_HORVU	61.6	1e-09	Serine carboxypeptidase II-3 OS=Hordeum vulgare GN=CXP;2-3 PE=2 SV=1	--	--	--	--	--	K13289	2e-13	70.5	zma:100281613	cathepsin A [EC:3.4.16.5]	GO:0019538//protein metabolic process	GO:0004180//carboxypeptidase activity	GO:0031410//cytoplasmic vesicle;GO:0043231//intracellular membrane-bounded organelle
	Unigene24763	0	0	0	1.03	0	0	0	0	#DIV/0!	#DIV/0!	172	2	0.8942	gi|130582|sp|P10978.1|POLX_TOBAC	76.6	8e-14	RecName: Full=Retrovirus-related Pol polyprotein from transposon TNT 1-94; Includes: RecName: Full=Protease; Includes: RecName: Full=Reverse transcriptase; Includes: RecName: Full=Endonuclease	sp|P10978|POLX_TOBAC	76.6	4e-14	Retrovirus-related Pol polyprotein from transposon TNT 1-94 OS=Nicotiana tabacum PE=2 SV=1	--	--	--	--	--	--	--	--	--	--	GO:0006259//DNA metabolic process;GO:0006544//glycine metabolic process;GO:0009117//nucleotide metabolic process	GO:0003676//nucleic acid binding;GO:0046914//transition metal ion binding;GO:0016646//oxidoreductase activity, acting on the CH-NH group of donors, NAD or NADP as acceptor;GO:0000166//nucleotide binding;GO:0005215//transporter activity	GO:0044464//cell part
	Unigene24970	4.6	138.24	108.97	49.17	23.68	14.88	3.24	6.93	4.17	10.3	173	198	88.0114	gi|18418270|ref|NP_567934.1|	105	1e-22	AGD2 (ABERRANT GROWTH AND DEATH 2); L,L-diaminopimelate aminotransferase/ transaminase [Arabidopsis thaliana] >gi|75163801|sp|Q93ZN9.1|DAPAT_ARATH RecName: Full=LL-diaminopimelate aminotransferase, chloroplastic; Short=LL-DAP-aminotransferase; Short=DAP-aminotransferase; Short=DAP-AT; Short=AtDAP-AT; AltName: Full=Protein ABERRANT GROWTH AND DEATH 2; Flags: Precursor >gi|15912291|gb|AAL08279.1| A…	sp|Q93ZN9|DAPAT_ARATH	105	7e-23	LL-diaminopimelate aminotransferase, chloroplastic OS=Arabidopsis thaliana GN=DAP PE=1 SV=1	CT390	68.6	3e-12	COG0436	Aspartate/tyrosine/aromatic aminotransferase	K10206	5e-24	105	ath:AT4G33680	LL-diaminopimelate aminotransferase [EC:2.6.1.83]	GO:0032012//regulation of ARF protein signal transduction;GO:0009085//lysine biosynthetic process;GO:0009627//systemic acquired resistance	GO:0048037//cofactor binding;GO:0046914//transition metal ion binding;GO:0005083//small GTPase regulator activity;GO:0008483//transaminase activity	GO:0009532//plastid stroma
	Unigene25015	19.32	110.19	107.01	70.68	27.98	6.38	27.01	10.89	3.43	8.1	173	51	22.6696	gi|22327641|ref|NP_199593.2|	87.8	3e-17	FRA1 (FRAGILE FIBER 1); microtubule motor [Arabidopsis thaliana] >gi|30695302|ref|NP_851151.1| FRA1 (FRAGILE FIBER 1); microtubule motor [Arabidopsis thaliana] >gi|27260890|gb|AAN86114.1| kinesin-like protein [Arabidopsis thaliana] >gi|27260892|gb|AAN86115.1| kinesin-like protein [Arabidopsis thaliana]	--	--	--	--	--	--	--	--	--	K10395	2e-15	77	ppp:PHYPADRAFT_40278	kinesin family member 4/7/21/27	GO:0007017//microtubule-based process;GO:0030198//extracellular matrix organization	GO:0003774//motor activity;GO:0032559//adenyl ribonucleotide binding	GO:0015630//microtubule cytoskeleton
	Unigene25057	0.92	184.32	80.5	136.23	3.23	0	0	0.99	41.41	100.5	173	62	27.5591	gi|158634902|gb|ABW76288.1|	65.5	2e-10	beta-glucosidase G3 [Medicago truncatula]	--	--	--	--	--	--	--	--	--	--	--	--	--	--	GO:0044238//primary metabolic process	GO:0016798//hydrolase activity, acting on glycosyl bonds;GO:0043167//ion binding	-
	Unigene25281	52.15	242.02	275.25	111.01	49.22	1.06	9.67	32.48	4.02	7.86	174	226	99.8802	gi|8131905|gb|AAF73132.1|AF149017_1	99	1e-20	homogentisate 1,2-dioxygenase [Solanum lycopersicum]	sp|Q9ZRA2|HGD_ARATH	96.3	5e-20	Homogentisate 1,2-dioxygenase OS=Arabidopsis thaliana GN=HGO PE=2 SV=2	CC2532	47.4	6e-06	COG3508	Homogentisate 1,2-dioxygenase	K00451	3e-24	106	vvi:100264043	homogentisate 1,2-dioxygenase [EC:1.13.11.5]	GO:0006558//L-phenylalanine metabolic process;GO:0006570//tyrosine metabolic process	GO:0016702//oxidoreductase activity, acting on single donors with incorporation of molecular oxygen, incorporation of two atoms of oxygen	-
	Unigene25336	0	2.99	3.9	7.13	1.07	1.06	0	1.97	2.37	4.62	174	3	1.3258	gi|42565106|ref|NP_188849.3|	50.4	6e-06	phototropic-responsive NPH3 protein-related [Arabidopsis thaliana]	--	--	--	--	--	--	--	--	--	--	--	--	--	--	GO:0009314//response to radiation	GO:0060089//molecular transducer activity	-
	Unigene25392	13.72	31.87	39.04	13.24	13.91	10.56	12.89	9.84	2.02	8.5	174	18	7.9551	gi|75120871|sp|Q6DW73.1|DGDG2_LOTJA	119	1e-26	RecName: Full=Digalactosyldiacylglycerol synthase 2, chloroplastic >gi|49617335|gb|AAT67423.1| digalactosyldiacylglycerol synthase 2 [Lotus japonicus]	sp|Q6DW73|DGDG2_LOTJA	119	7e-27	Digalactosyldiacylglycerol synthase 2, chloroplastic OS=Lotus japonicus GN=DGD2 PE=2 SV=1	--	--	--	--	--	K09480	9e-26	111	vvi:100251641	digalactosyldiacylglycerol synthase [EC:2.4.1.241]	GO:0009267//cellular response to starvation;GO:0009247//glycolipid biosynthetic process;GO:0044403//symbiosis, encompassing mutualism through parasitism	GO:0035250//UDP-galactosyltransferase activity	GO:0030659//cytoplasmic vesicle membrane;GO:0009527//plastid outer membrane
	Unigene25435	17.28	51.5	53.38	44.55	11.7	1.05	11.75	10.77	2.88	6.68	175	127	55.8066	gi|13646986|dbj|BAB41080.1|	75.5	2e-13	DNA-binding protein DF1 [Pisum sativum]	--	--	--	--	--	--	--	--	--	--	--	--	--	--	GO:0010468//regulation of gene expression	GO:0003676//nucleic acid binding	-
	Unigene25440	3.64	132.7	100.93	29.36	3.19	4.2	0	0	20.86	41.77	175	54	23.7288	gi|157416233|gb|ABV54754.1|	112	1e-24	beta-glucosidase-like protein [Trifolium repens]	sp|Q5Z9Z0|BGL24_ORYSJ	82	1e-15	Beta-glucosidase 24 OS=Oryza sativa subsp. japonica GN=BGLU24 PE=2 SV=1	--	--	--	--	--	K05350	1e-17	84.3	vvi:100254458	beta-glucosidase [EC:3.2.1.21]	GO:0044238//primary metabolic process	GO:0015926//glucosidase activity;GO:0043167//ion binding	-
	Unigene25515	12.74	901.16	1207.29	314.91	2.13	13.66	0	0	59.15	116.21	175	58	25.4865	gi|38683953|gb|AAR27015.1|	61.2	3e-09	dihydroflavonal-4-reductase 2 [Medicago truncatula]	--	--	--	--	--	--	--	--	--	K13082	3e-06	46.6	vvi:100233141	bifunctional dihydroflavonol 4-reductase/flavanone 4-reductase [EC:1.1.1.219 1.1.1.234]	GO:0008152//metabolic process	GO:0048037//cofactor binding;GO:0016616//oxidoreductase activity, acting on the CH-OH group of donors, NAD or NADP as acceptor	-
	Unigene25522	1.82	85.16	73.76	63.79	25.53	7.35	2.14	0	2.91	6.36	175	206	90.521	gi|6624705|emb|CAB63844.1|	110	6e-24	glutamine synthetase I [Medicago truncatula]	--	--	--	--	--	--	--	--	--	--	--	--	--	--	GO:0044249//cellular biosynthetic process;GO:0006541//glutamine metabolic process	GO:0016211//ammonia ligase activity;GO:0032559//adenyl ribonucleotide binding	-
	Unigene25631	0	0.99	0.97	0	0	0	0	0	#DIV/0!	#DIV/0!	175	2	0.8788	gi|87162498|gb|ABD28293.1|	96.7	7e-20	RNA-directed DNA polymerase (Reverse transcriptase); Zinc finger, CCHC-type; Peptidase aspartic, active site; Retrotransposon gag protein [Medicago truncatula]	--	--	--	--	--	--	--	--	--	--	--	--	--	--	GO:0006260//DNA replication	GO:0046914//transition metal ion binding;GO:0003676//nucleic acid binding;GO:0034061	-
	Unigene25671	6.33	123.08	226.77	68.46	14.81	12.53	0	0.97	9.42	19.9	176	98	42.8187	gi|8918273|dbj|BAA97559.1|	105	2e-22	mixed-amyrin synthase [Pisum sativum]	sp|P0C8Y0|LUP3_ARATH	77	3e-14	Camelliol C synthase OS=Arabidopsis thaliana GN=CAMS1 PE=3 SV=1	--	--	--	--	--	K01853	1e-14	74.7	ath:AT1G78960	cycloartenol synthase [EC:5.4.99.8]	GO:0016104//triterpenoid biosynthetic process	GO:0031559//oxidosqualene cyclase activity	-
	Unigene25801	77.79	918.69	783.56	153.04	89.92	56.4	69.02	0	6.88	16	176	507	221.521	gi|1209703|gb|AAB87721.1|	70.9	4e-12	maize gl1 homolog [Arabidopsis thaliana]	--	--	--	--	--	--	--	--	--	--	--	--	--	--	GO:0006631//fatty acid metabolic process	GO:0046914//transition metal ion binding;GO:0003824//catalytic activity	GO:0043231//intracellular membrane-bounded organelle;GO:0031224//intrinsic to membrane
	Unigene25857	0	0	0	1.01	0	0	0	0	#DIV/0!	#DIV/0!	176	3	1.3108	gi|59894806|gb|AAX11214.1|	73.6	7e-13	nodule-specific IRE-like protein [Medicago truncatula]	--	--	--	--	--	--	--	--	--	--	--	--	--	--	GO:0006464//protein modification process;GO:0000902//cell morphogenesis	GO:0004674//protein serine/threonine kinase activity;GO:0032559//adenyl ribonucleotide binding	-
	Unigene26092	4.5	59.73	71	48.05	9.47	2.08	10.56	18.39	3.24	8.03	177	16	6.9513	gi|164457325|dbj|BAF98176.1|	108	2e-23	trehalose-6-phosphate synthase [Solanum lycopersicum]	sp|Q9ZV48|TPS11_ARATH	102	7e-22	Probable alpha,alpha-trehalose-phosphate synthase [UDP-forming] 11 OS=Arabidopsis thaliana GN=TPS11 PE=2 SV=1	YBR126c	57.4	6e-09	COG0380	Trehalose-6-phosphate synthase	K00697	2e-21	97.1	ath:AT1G06410	alpha,alpha-trehalose-phosphate synthase (UDP-forming) [EC:2.4.1.15]	GO:0005991//trehalose metabolic process	GO:0035251//UDP-glucosyltransferase activity;GO:0019203//carbohydrate phosphatase activity	GO:0043231//intracellular membrane-bounded organelle
	Unigene26145	0.89	22.39	8.59	1.99	1.05	0	1.05	0	10.47	18.91	178	22	9.5044	gi|297803126|ref|XP_002869447.1|	65.9	1e-10	gamma-glutamyl transpeptidase 3 [Arabidopsis lyrata subsp. lyrata] >gi|297315283|gb|EFH45706.1| gamma-glutamyl transpeptidase 3 [Arabidopsis lyrata subsp. lyrata]	--	--	--	--	--	--	--	--	--	K00681	2e-14	74.3	rcu:RCOM_1048800	gamma-glutamyltranspeptidase [EC:2.3.2.2]	GO:0006749//glutathione metabolic process	GO:0016755	GO:0043231//intracellular membrane-bounded organelle
	Unigene26162	0.89	6.82	3.82	2.99	0	1.03	0	1.92	2.36	4.67	178	3	1.296	gi|124360392|gb|ABN08405.1|	80.5	5e-15	Peptidase aspartic, active site [Medicago truncatula]	--	--	--	--	--	--	--	--	--	--	--	--	--	--	GO:0006259//DNA metabolic process	GO:0003676//nucleic acid binding;GO:0016740//transferase activity	GO:0043229//intracellular organelle
	Unigene26199	0	0.97	10.5	1	0	0	0	0	#DIV/0!	#DIV/0!	178	3	1.296	gi|38036047|gb|AAR08413.1|	95.9	1e-19	metal transport protein [Medicago truncatula]	sp|O81123|ZIP1_ARATH	51.6	1e-06	Zinc transporter 1 OS=Arabidopsis thaliana GN=ZIP1 PE=2 SV=1	--	--	--	--	--	--	--	--	--	--	GO:0008152//metabolic process;GO:0000041//transition metal ion transport	GO:0015082//di-, tri-valent inorganic cation transmembrane transporter activity;GO:0016628//oxidoreductase activity, acting on the CH-CH group of donors, NAD or NADP as acceptor	GO:0031224//intrinsic to membrane
	Unigene26236	16.99	156.75	94.46	33.85	7.32	41.31	14.7	27.91	2.3	5.54	178	130	56.1621	gi|75330801|sp|Q8RYM9.1|LAC2_ORYSJ	103	6e-22	RecName: Full=Laccase-2; AltName: Full=Benzenediol:oxygen oxidoreductase 2; AltName: Full=Urishiol oxidase 2; AltName: Full=Diphenol oxidase 2; Flags: Precursor	sp|Q8RYM9|LAC2_ORYSJ	103	3e-22	Laccase-2 OS=Oryza sativa subsp. japonica GN=LAC2 PE=2 SV=1	--	--	--	--	--	K00368	6e-11	62.4	osa:4324803	nitrite reductase (NO-forming) [EC:1.7.2.1]	GO:0009808//lignin metabolic process	GO:0046914//transition metal ion binding;GO:0016682//oxidoreductase activity, acting on diphenols and related substances as donors, oxygen as acceptor	GO:0005576//extracellular region;GO:0031410//cytoplasmic vesicle
	Unigene26242	110.01	751.62	790.02	305.62	229.07	192.09	17.85	38.49	2.69	5.39	178	469	202.616	gi|194136581|gb|ACF33513.1|	100	4e-21	salicylic acid methyl transferase-like protein [Glycine max]	sp|Q9SBK6|JMT_BRARP	63.2	5e-10	Jasmonate O-methyltransferase OS=Brassica rapa subsp. pekinensis GN=JMT PE=1 SV=1	--	--	--	--	--	K08241	4e-10	59.7	ath:AT1G19640	jasmonate O-methyltransferase [EC:2.1.1.141]	GO:0008610//lipid biosynthetic process	GO:0008757//S-adenosylmethionine-dependent methyltransferase activity	-
	Unigene26258	0.89	53.55	44.84	14.93	2.09	0	0	0	18.06	40.37	178	8	3.4561	gi|37780045|gb|AAP32195.1|	98.6	2e-20	cysteine protease 5 [Trifolium repens]	sp|P80884|ANAN_ANACO	53.5	4e-07	Ananain OS=Ananas comosus GN=AN1 PE=1 SV=2	--	--	--	--	--	K01376	1e-08	54.7	ath:AT3G49340	[EC:3.4.22.-]	GO:0019538//protein metabolic process	GO:0016628//oxidoreductase activity, acting on the CH-CH group of donors, NAD or NADP as acceptor;GO:0004175//endopeptidase activity	-
	Unigene2663	2.17	9.45	4.63	2.42	0	0.84	0	1.56	2.53	4.79	220	15	5.2431	gi|224120768|ref|XP_002318412.1|	80.5	1e-32	SET domain protein [Populus trichocarpa] >gi|222859085|gb|EEE96632.1| SET domain protein [Populus trichocarpa]	sp|Q8GZ42|ATX5_ARATH	79	4e-32	Histone-lysine N-methyltransferase ATX5 OS=Arabidopsis thaliana GN=ATX5 PE=2 SV=1	--	--	--	--	--	--	--	--	--	--	GO:0006351//transcription, DNA-dependent;GO:0009292//genetic transfer	GO:0046914//transition metal ion binding;GO:0016279//protein-lysine N-methyltransferase activity	GO:0043231//intracellular membrane-bounded organelle
	Unigene26907	3.52	385.86	141.69	342.65	6.17	0	0	1.89	47	110.31	181	244	103.665	gi|158634902|gb|ABW76288.1|	118	2e-26	beta-glucosidase G3 [Medicago truncatula]	sp|P26205|BGLT_TRIRP	102	7e-22	Cyanogenic beta-glucosidase (Fragment) OS=Trifolium repens GN=LI PE=1 SV=1	--	--	--	--	--	K01188	1e-16	81.3	ath:AT2G44450	beta-glucosidase [EC:3.2.1.21]	GO:0044238//primary metabolic process	GO:0043167//ion binding;GO:0008422//beta-glucosidase activity	-
	Unigene26997	18.47	291.07	247.72	156.64	46.29	2.03	1.03	30.28	5.01	11.03	181	163	69.2515	gi|222424044|dbj|BAH19983.1|	98.6	2e-20	AT5G20250 [Arabidopsis thaliana]	sp|Q8RX87|RFS6_ARATH	98.6	1e-20	Probable galactinol--sucrose galactosyltransferase 6 OS=Arabidopsis thaliana GN=RFS6 PE=2 SV=2	--	--	--	--	--	K06611	1e-06	48.1	ath:AT5G40390	stachyose synthetase [EC:2.4.1.67]	GO:0006950//response to stress	GO:0008378//galactosyltransferase activity	GO:0009536//plastid
	Unigene27016	4.4	120.64	78.82	29.37	0	5.08	0	0	15.02	28.54	181	62	26.3411	gi|158634902|gb|ABW76288.1|	108	1e-23	beta-glucosidase G3 [Medicago truncatula]	sp|P26205|BGLT_TRIRP	108	1e-23	Cyanogenic beta-glucosidase (Fragment) OS=Trifolium repens GN=LI PE=1 SV=1	BH1923	79	2e-15	COG2723	Beta-glucosidase/6-phospho-beta-glucosidase/beta-galactosidase	K01188	2e-22	100	osa:4336146	beta-glucosidase [EC:3.2.1.21]	GO:0044238//primary metabolic process	GO:0015926//glucosidase activity;GO:0043167//ion binding	-
	Unigene27176	6.12	269.47	232.36	47.71	4.09	2.02	42.1	8.47	4.35	10.23	182	264	111.546	gi|255568452|ref|XP_002525200.1|	70.1	7e-12	conserved hypothetical protein [Ricinus commUnis] >gi|223535497|gb|EEF37166.1| conserved hypothetical protein [Ricinus commUnis]	--	--	--	--	--	--	--	--	--	--	--	--	--	--	GO:0010468//regulation of gene expression	GO:0003677//DNA binding	GO:0043231//intracellular membrane-bounded organelle
	Unigene27889	47.33	113.35	104.66	103.45	46.29	30.8	15.15	0	2.26	3.88	185	391	162.527	gi|300507125|gb|ADK23938.1|	79.3	1e-14	GPAT [Gossypium hirsutum]	sp|Q5XF03|GPAT8_ARATH	76.3	5e-14	Probable glycerol-3-phosphate acyltransferase 8 OS=Arabidopsis thaliana GN=GPAT8 PE=2 SV=1	--	--	--	--	--	K13508	1e-15	78.2	pop:POPTR_834747	glycerol-3-phosphate acyltransferase [EC:2.3.1.15]	GO:0006633//fatty acid biosynthetic process;GO:0009791//post-embryonic development	GO:0016411//acylglycerol O-acyltransferase activity	GO:0043231//intracellular membrane-bounded organelle
	Unigene27982	5.16	375.64	425.05	143.68	2.01	0	0	0	60.97	138.72	185	239	99.3451	gi|217073164|gb|ACJ84941.1|	99.4	1e-20	unknown [Medicago truncatula]	--	--	--	--	--	--	--	--	--	--	--	--	--	--	GO:0010468//regulation of gene expression	GO:0003676//nucleic acid binding	GO:0043231//intracellular membrane-bounded organelle
	Unigene27991	66.26	215.46	151.47	90.04	37.24	12.92	60.61	51.85	2.3	4.98	185	199	82.7183	gi|224127622|ref|XP_002329323.1|	83.6	6e-16	4-coumarate-coa ligase [Populus trichocarpa] >gi|224127626|ref|XP_002329324.1| acyl:coa ligase [Populus trichocarpa] >gi|222870777|gb|EEF07908.1| 4-coumarate-coa ligase [Populus trichocarpa] >gi|222870778|gb|EEF07909.1| acyl:coa ligase [Populus trichocarpa]	sp|Q9M0X9|4CLL7_ARATH	65.1	1e-10	4-coumarate--CoA ligase-like 7 OS=Arabidopsis thaliana GN=4CLL7 PE=1 SV=1	--	--	--	--	--	K01904	9e-12	65.1	ath:AT4G05160	4-coumarate--CoA ligase [EC:6.2.1.12]	GO:0009694//jasmonic acid metabolic process;GO:0009850//auxin metabolic process	GO:0016874//ligase activity;GO:0016703;GO:0016408	GO:0042579//microbody
	Unigene28025	76.59	224.82	200.13	100.57	40.26	42.73	51.52	16.67	2.29	6	185	304	126.364	gi|209528461|emb|CAR82238.1|	137	3e-32	pheophorbide a oxygenase [Pisum sativum]	sp|Q9FYC2|PAO_ARATH	127	2e-29	Pheophorbide a oxygenase, chloroplastic OS=Arabidopsis thaliana GN=PAO PE=1 SV=1	--	--	--	--	--	K13071	2e-33	137	pop:POPTR_1117517	pheophorbide a oxygenase [EC:1.14.12.20]	GO:0042742//defense response to bacterium;GO:0006787;GO:0009791//post-embryonic development;GO:0048608//reproductive structure development	GO:0043169//cation binding;GO:0051536//iron-sulfur cluster binding;GO:0016730//oxidoreductase activity, acting on iron-sulfur proteins as donors;GO:0016703	GO:0009528//plastid inner membrane
	Unigene28145	4.28	278.59	377.11	324.87	120.12	9.88	3.01	7.37	2.72	5.84	186	129	53.3331	gi|145442272|gb|ABP68856.1|	59.7	1e-08	endonuclease [Glycine max]	--	--	--	--	--	--	--	--	--	--	--	--	--	--	GO:0006259//DNA metabolic process	GO:0004521//endoribonuclease activity;GO:0005488//binding;GO:0004520//endodeoxyribonuclease activity	-
	Unigene28231	0	0	0	1.91	0	0	0	0	#DIV/0!	#DIV/0!	186	2	0.8269	gi|20429011|emb|CAC79651.1|	101	2e-21	threonyl-tRNA synthetase [Oryza sativa (japonica cultivar-group)]	sp|Q3ZBV8|SYTC_BOVIN	117	3e-26	Threonyl-tRNA synthetase, cytoplasmic OS=Bos taurus GN=TARS PE=2 SV=1	YIL078w	112	2e-25	COG0441	Threonyl-tRNA synthetase	K01868	9e-23	101	ppp:PHYPADRAFT_227167	threonyl-tRNA synthetase [EC:6.1.1.3]	GO:0006418//tRNA aminoacylation for protein translation	GO:0004812//aminoacyl-tRNA ligase activity;GO:0032559//adenyl ribonucleotide binding	GO:0043231//intracellular membrane-bounded organelle
	Unigene28301	237.95	744.45	685.73	481.11	292.28	49.42	149.7	262.45	2.18	4.44	186	684	282.789	gi|82469976|gb|ABB77236.1|	106	9e-23	patellin 1 [Cucurbita pepo]	sp|Q56Z59|PATL3_ARATH	91.3	2e-18	Patellin-3 OS=Arabidopsis thaliana GN=PATL3 PE=1 SV=2	--	--	--	--	--	--	--	--	--	--	GO:0051234//establishment of localization	-	GO:0016020//membrane
	Unigene28420	209.43	623.7	576.71	204.68	28.87	17.69	5	0	2.24	4.7	187	229	94.1703	gi|199612209|gb|ACH91370.1|	97.4	4e-20	lipoxygenase LOX-3 [Prunus persica]	sp|P38415|LOXA_SOLLC	84	3e-16	Lipoxygenase A OS=Solanum lycopersicum GN=LOX1.1 PE=2 SV=1	--	--	--	--	--	K00454	1e-16	81.3	ath:AT1G55020	lipoxygenase [EC:1.13.11.12]	GO:0006633//fatty acid biosynthetic process	GO:0046914//transition metal ion binding;GO:0016702//oxidoreductase activity, acting on single donors with incorporation of molecular oxygen, incorporation of two atoms of oxygen	-
	Unigene28568	2.55	168.67	179.83	58.75	6.97	2.95	22.98	3.66	5.91	14.79	187	210	86.357	gi|151934183|gb|ABS18429.1|	117	5e-26	WRKY29 [Glycine max]	sp|Q9XI90|WRKY4_ARATH	81.6	1e-15	Probable WRKY transcription factor 4 OS=Arabidopsis thaliana GN=WRKY4 PE=1 SV=2	--	--	--	--	--	K13424	2e-16	80.5	rcu:RCOM_0849600	WRKY transcription factor 33	GO:0010468//regulation of gene expression	GO:0003677//DNA binding	GO:0043231//intracellular membrane-bounded organelle
	Unigene28611	0	0	0	2.84	0	0	0	0	#DIV/0!	#DIV/0!	187	2	0.8224	gi|255598089|ref|XP_002536928.1|	63.2	9e-10	conserved hypothetical protein [Ricinus commUnis] >gi|223518095|gb|EEF25455.1| conserved hypothetical protein [Ricinus commUnis]	sp|B8D7E7|GMHA_BUCAT	96.7	4e-20	Phosphoheptose isomerase OS=Buchnera aphidicola subsp. Acyrthosiphon pisum (strain Tuc7) GN=gmhA PE=3 SV=1	BU250	96.7	9e-21	COG0279	Phosphoheptose isomerase	--	--	--	--	--	GO:0044238//primary metabolic process	GO:0030246//carbohydrate binding	-
	Unigene28722	0	0	0	9.43	0	0	0	0	#DIV/0!	#DIV/0!	188	3	1.2271	gi|161137763|gb|ABX57881.1|	78.6	2e-14	DnaJ [Viola baoshanensis]	sp|P63036|DNJA1_RAT	85.5	9e-17	DnaJ homolog subfamily A member 1 OS=Rattus norvegicus GN=Dnaja1 PE=2 SV=1	SPBC1734.11	73.9	7e-14	COG0484	DnaJ-class molecular chaperone with C-terminal Zn finger domain	K09503	1e-15	78.2	ppp:PHYPADRAFT_133065	DnaJ homolog subfamily A member 2	GO:0006950//response to stress	GO:0005515//protein binding	GO:0016020//membrane
	Unigene28733	0.85	10.14	0	0	0	0	0	0	3.99	8.48	188	4	1.6361	gi|255317077|gb|ACU01856.1|	62.8	1e-09	Na+/H+ exchanger 5 [Populus euphratica]	--	--	--	--	--	--	--	--	--	--	--	--	--	--	GO:0055067;GO:0030001//metal ion transport	GO:0005451//monovalent cation:hydrogen antiporter activity	GO:0031224//intrinsic to membrane
	Unigene28821	0	0.92	3.61	0	0	0	0	0	#DIV/0!	#DIV/0!	188	3	1.2271	gi|15239981|ref|NP_199189.1|	65.9	1e-10	KCS20 (3-KETOACYL-COA SYNTHASE 20); fatty acid elongase [Arabidopsis thaliana] >gi|75262422|sp|Q9FG87.1|KCS19_ARATH RecName: Full=3-ketoacyl-CoA synthase 19; Short=KCS-19; AltName: Full=Very long-chain fatty acid condensing enzyme 19; Short=VLCFA condensing enzyme 19 >gi|15983491|gb|AAL11613.1|AF424620_1 AT5g43760/MQD19_11 [Arabidopsis thaliana] >gi|10177945|dbj|BAB11304.1| beta-ketoacyl-CoA synt…	sp|Q9FG87|KCS19_ARATH	65.9	8e-11	3-ketoacyl-CoA synthase 19 OS=Arabidopsis thaliana GN=KCS19 PE=2 SV=1	--	--	--	--	--	--	--	--	--	--	GO:0009314//response to radiation;GO:0006950//response to stress;GO:0006631//fatty acid metabolic process	GO:0004312//fatty-acid synthase activity	GO:0044464//cell part
	Unigene28834	0	0.92	1.81	1.89	0	0	0	0	#DIV/0!	#DIV/0!	188	4	1.6361	gi|255561453|ref|XP_002521737.1|	55.1	2e-07	kinase, putative [Ricinus commUnis] >gi|223539128|gb|EEF40724.1| kinase, putative [Ricinus commUnis]	--	--	--	--	--	--	--	--	--	K08852	9e-09	55.1	rcu:RCOM_0875020	serine/threonine-protein kinase/endoribonuclease IRE1 [EC:2.7.11.1 3.1.26.-]	GO:0044260;GO:0044238//primary metabolic process	GO:0004672//protein kinase activity	-
	Unigene28996	67.39	187.05	182.42	165.95	78.81	28.21	0	4.53	2.26	3.97	189	140	56.9621	gi|194272792|gb|ACF37256.1|	74.3	4e-13	nematode resistance HS1pro1 protein [Glycine max]	--	--	--	--	--	--	--	--	--	--	--	--	--	--	GO:0042742//defense response to bacterium;GO:0010033//response to organic substance	-	-
	Unigene29275	5.87	76.62	52.74	65.28	25.48	4.84	6.88	10.82	2.55	6.35	190	147	59.4955	gi|57232107|gb|AAW47739.1|	125	2e-28	beta-galactosidase [Prunus persica]	sp|Q9SCV9|BGAL3_ARATH	124	2e-28	Beta-galactosidase 3 OS=Arabidopsis thaliana GN=BGAL3 PE=1 SV=1	--	--	--	--	--	K01190	1e-22	100	ath:AT3G52840	beta-galactosidase [EC:3.2.1.23]	GO:0044238//primary metabolic process	GO:0030246//carbohydrate binding;GO:0043167//ion binding;GO:0015925	GO:0044464//cell part;GO:0043234//protein complex
	Unigene30877	34.93	56.59	74.52	97.64	21.85	23.45	19.07	3.5	2.18	4.93	196	89	34.9184	gi|115451981|ref|NP_001049591.1|	138	2e-32	Os03g0255100 [Oryza sativa Japonica Group] >gi|113548062|dbj|BAF11505.1| Os03g0255100 [Oryza sativa Japonica Group]	sp|Q10NX8|BGAL6_ORYSJ	138	9e-33	Beta-galactosidase 6 OS=Oryza sativa subsp. japonica GN=Os03g0255100 PE=1 SV=2	--	--	--	--	--	K01190	2e-27	117	ath:AT3G52840	beta-galactosidase [EC:3.2.1.23]	GO:0044238//primary metabolic process	GO:0030246//carbohydrate binding;GO:0043167//ion binding;GO:0015925	GO:0031410//cytoplasmic vesicle;GO:0030312//external encapsulating structure
	Unigene30928	0	0	0	11.75	0	1.88	0	0	2.09	4.22	196	4	1.5694	gi|1912312|gb|AAB50954.1|	80.5	5e-15	glycolytic glyceraldehyde-3-phosphate dehydrogenase [Pyrenomonas salina]	sp|Q4U3L0|G3P_GLOMM	97.8	2e-20	Glyceraldehyde-3-phosphate dehydrogenase OS=Glossina morsitans morsitans GN=Gapdh PE=2 SV=1	SPBC32F12.11	75.9	2e-14	COG0057	Glyceraldehyde-3-phosphate dehydrogenase/erythrose-4-phosphate dehydrogenase	K00134	5e-16	79.3	zma:100280944	glyceraldehyde 3-phosphate dehydrogenase [EC:1.2.1.12]	GO:0006006//glucose metabolic process	GO:0005488//binding;GO:0008943//glyceraldehyde-3-phosphate dehydrogenase activity;GO:0016853//isomerase activity	-
	Unigene31188	7.27	27.27	41.38	6.3	0.95	2.8	7.59	1.74	3.29	6.66	197	23	8.978	gi|6635838|gb|AAF20002.1|AF213936_1	99.8	9e-21	amino acid/peptide transporter [Prunus dulcis]	sp|P46032|PTR2_ARATH	99	8e-21	Peptide transporter PTR2 OS=Arabidopsis thaliana GN=PTR2 PE=1 SV=1	--	--	--	--	--	K03305	5e-21	95.9	rcu:RCOM_0776160	proton-dependent oligopeptide transporter, POT family	GO:0006857//oligopeptide transport;GO:0008152//metabolic process	GO:0015198//oligopeptide transporter activity;GO:0015103//inorganic anion transmembrane transporter activity	GO:0005773//vacuole;GO:0031090//organelle membrane;GO:0031224//intrinsic to membrane
	Unigene31265	35.56	263.03	227.6	91.75	60.49	2.8	60.71	58.25	3.2	6	197	645	251.776	gi|13646986|dbj|BAB41080.1|	77.8	4e-14	DNA-binding protein DF1 [Pisum sativum]	--	--	--	--	--	--	--	--	--	--	--	--	--	--	GO:0010468//regulation of gene expression	GO:0003676//nucleic acid binding	-
	Unigene31267	4.04	95.01	96.56	28.78	3.78	0	1.9	2.61	18.18	43.54	197	75	29.2762	gi|168034319|ref|XP_001769660.1|	91.7	2e-18	Rab5/RabF-family small GTPase [Physcomitrella patens subsp. patens] >gi|162679009|gb|EDQ65461.1| Rab5/RabF-family small GTPase [Physcomitrella patens subsp. patens]	sp|P29687|RAB5_TOBAC	89	8e-18	Ras-related protein Rab5 OS=Nicotiana tabacum GN=RAB5 PE=2 SV=1	ECU04g0680	54.3	5e-08	COG1100	GTPase SAR1 and related small G proteins	K07976	1e-16	81.3	ath:AT5G45130	Rab family, other	GO:0006810//transport	GO:0032561//guanyl ribonucleotide binding;GO:0003824//catalytic activity	GO:0016020//membrane
	Unigene31287	21.01	131.95	105.18	57.57	14.18	3.73	17.07	13.04	4.68	13.15	197	166	64.798	gi|22327641|ref|NP_199593.2|	109	1e-23	FRA1 (FRAGILE FIBER 1); microtubule motor [Arabidopsis thaliana] >gi|30695302|ref|NP_851151.1| FRA1 (FRAGILE FIBER 1); microtubule motor [Arabidopsis thaliana] >gi|27260890|gb|AAN86114.1| kinesin-like protein [Arabidopsis thaliana] >gi|27260892|gb|AAN86115.1| kinesin-like protein [Arabidopsis thaliana]	sp|Q6S003|KIF8_DICDI	65.1	1e-10	Kinesin-related protein 8 OS=Dictyostelium discoideum GN=kif8 PE=2 SV=1	SPAC1834.07	59.7	1e-09	COG5059	Kinesin-like protein	K10395	6e-18	85.5	ppp:PHYPADRAFT_40278	kinesin family member 4/7/21/27	GO:0007017//microtubule-based process;GO:0030198//extracellular matrix organization	GO:0003774//motor activity;GO:0032559//adenyl ribonucleotide binding	GO:0009536//plastid;GO:0015630//microtubule cytoskeleton
	Unigene31480	0.8	13.13	8.58	8.05	0.94	1.86	0	4.33	2.29	5	198	5	1.9419	gi|22328609|ref|NP_193143.2|	118	2e-26	AAE15 (acyl-activating enzyme 15); long-chain-fatty-acid-[acyl-carrier-protein] ligase [Arabidopsis thaliana] >gi|17065456|gb|AAL32882.1| A6 anther-specific protein [Arabidopsis thaliana] >gi|34098785|gb|AAQ56775.1| At4g14070 [Arabidopsis thaliana] >gi|118420017|gb|ABK88270.1| chloroplast acyl ACP synthetase [Arabidopsis thaliana]	--	--	--	--	slr1609	68.6	3e-12	COG1022	Long-chain acyl-CoA synthetases (AMP-forming)	K01897	7e-28	118	ath:AT4G14070	long-chain acyl-CoA synthetase [EC:6.2.1.3]	GO:0006633//fatty acid biosynthetic process	GO:0015645//fatty-acid ligase activity	GO:0009526//plastid envelope
	Unigene31539	0.8	65.64	100.36	66.23	21.63	0	7.55	22.49	3.44	6.1	198	33	12.8165	gi|113367188|gb|ABI34651.1|	120	4e-27	bZIP transcription factor bZIP73A [Glycine max]	sp|P24068|OCS1_MAIZE	49.7	6e-06	Ocs element-binding factor 1 OS=Zea mays GN=OBF1 PE=2 SV=2	--	--	--	--	--	K04371	6e-11	62.4	vvi:100254083	extracellular signal-regulated kinase 1/2 [EC:2.7.11.24]	GO:0006351//transcription, DNA-dependent	GO:0042802//identical protein binding;GO:0003677//DNA binding;GO:0046983//protein dimerization activity	GO:0043231//intracellular membrane-bounded organelle
	Unigene31612	65.93	210.06	230.74	97.55	72.4	3.71	19.82	43.25	2.48	4.71	198	289	112.241	gi|15228909|ref|NP_188316.1|	94.7	3e-19	AAE7 (ACYL-ACTIVATING ENZYME 7); AMP binding / acetate-CoA ligase [Arabidopsis thaliana] >gi|20799723|gb|AAM28624.1|AF503766_1 adenosine monophosphate binding protein 7 AMPBP7 [Arabidopsis thaliana] >gi|18086379|gb|AAL57649.1| AT3g16910/K14A17_3 [Arabidopsis thaliana] >gi|19699128|gb|AAL90930.1| AT3g16910/K14A17_3 [Arabidopsis thaliana]	--	--	--	--	--	--	--	--	--	--	--	--	--	--	GO:0044262//cellular carbohydrate metabolic process;GO:0032787	GO:0016405//CoA-ligase activity	GO:0042579//microbody
	Unigene31618	14.47	63.02	40.31	49.22	22.57	0.93	12.27	7.79	2.25	4.89	198	72	27.9632	gi|3913927|sp|Q43857.1|INVA_VICFA	68.9	2e-11	RecName: Full=Acid beta-fructofuranosidase; AltName: Full=Acid sucrose hydrolase; AltName: Full=Acid invertase; Short=AI; AltName: Full=Vacuolar invertase; Flags: Precursor >gi|861159|emb|CAA89992.1| vacuolar invertase; beta-fructofuranosidase [Vicia faba var. minor]	sp|Q43857|INVA_VICFA	68.9	9e-12	Acid beta-fructofuranosidase OS=Vicia faba GN=VCINV PE=2 SV=1	--	--	--	--	--	--	--	--	--	--	GO:0044238//primary metabolic process	GO:0004553//hydrolase activity, hydrolyzing O-glycosyl compounds	GO:0043231//intracellular membrane-bounded organelle
	Unigene31659	0	0	0	3.58	0	0	0	0	#DIV/0!	#DIV/0!	198	3	1.1651	gi|300261730|gb|EFJ45941.1|	69.3	1e-11	adenylate kinase [Volvox carteri f. nagariensis]	sp|Q20140|KAD1_CAEEL	80.5	3e-15	Probable adenylate kinase isoenzyme F38B2.4 OS=Caenorhabditis elegans GN=F38B2.4 PE=2 SV=1	YKL024c	57	8e-09	COG0563	Adenylate kinase and related kinases	K13800	4e-13	69.7	ppp:PHYPADRAFT_220749	UMP-CMP kinase [EC:2.7.4.- 2.7.4.14]	GO:0009117//nucleotide metabolic process	GO:0019205//nucleobase, nucleoside, nucleotide kinase activity;GO:0016776//phosphotransferase activity, phosphate group as acceptor;GO:0032559//adenyl ribonucleotide binding	GO:0043231//intracellular membrane-bounded organelle;GO:0042995//cell projection
	Unigene31721	12.8	108.86	140.82	109.53	34.62	2.77	3.76	0	3.46	7.69	199	70	27.0499	gi|6624705|emb|CAB63844.1|	126	9e-29	glutamine synthetase I [Medicago truncatula]	--	--	--	--	--	--	--	--	--	--	--	--	--	--	GO:0006541//glutamine metabolic process	GO:0016211//ammonia ligase activity;GO:0032559//adenyl ribonucleotide binding	-
	Unigene31756	42.4	168.08	140.82	98.84	41.17	7.39	14.09	49.92	2.72	5.54	199	202	78.0582	gi|18182309|gb|AAL65124.1|	116	9e-26	GT-2 factor [Glycine max]	--	--	--	--	--	--	--	--	--	--	--	--	--	--	GO:0010468//regulation of gene expression	GO:0003676//nucleic acid binding	GO:0043231//intracellular membrane-bounded organelle;GO:0031410//cytoplasmic vesicle
	Unigene31785	19.2	142.82	124.6	39.18	11.23	27.71	7.51	6.02	3.69	9.7	199	124	47.9169	gi|20800441|gb|AAB03843.2|	68.9	2e-11	aspartic proteinase [Vigna unguiculata] >gi|33339734|gb|AAQ14346.1| aspartic proteinase [Vigna unguiculata]	sp|O04057|ASPR_CUCPE	57.8	2e-08	Aspartic proteinase OS=Cucurbita pepo PE=2 SV=1	--	--	--	--	--	K08245	1e-09	58.2	vvi:100233021	phytepsin [EC:3.4.23.40]	GO:0044238//primary metabolic process	GO:0008233//peptidase activity	-
	Unigene31855	0	0	0.85	6.23	0.94	0	0	0	2.52	5.2	199	4	1.5457	gi|225470181|ref|XP_002268244.1|	52	2e-06	PREDICTED: similar to Os04g0533900 [Vitis vinifera]	sp|Q8STA9|Y5G8_ENCCU	60.5	3e-09	UPF0329 protein ECU05_1680/ECU11_0050 OS=Encephalitozoon cUniculi GN=ECU05_1680 PE=3 SV=1	Cgl2105	54.3	5e-08	COG0206	Cell division GTPase	K12811	2e-07	50.4	rcu:RCOM_0075460	ATP-dependent RNA helicase DDX46/PRP5 [EC:3.6.4.13]	GO:0044238//primary metabolic process;GO:0006779//porphyrin biosynthetic process;GO:0015979//photosynthesis;GO:0006812//cation transport	GO:0017111//nucleoside-triphosphatase activity;GO:0043169//cation binding;GO:0051536//iron-sulfur cluster binding;GO:0016491//oxidoreductase activity;GO:0032559//adenyl ribonucleotide binding	GO:0009536//plastid
	Unigene31874	1.6	4.35	5.12	3.56	0	0	0	0	2.72	5.63	199	2	0.7729	gi|224127502|ref|XP_002320090.1|	91.3	3e-18	f-box family protein [Populus trichocarpa] >gi|222860863|gb|EEE98405.1| f-box family protein [Populus trichocarpa]	sp|Q9LEX0|P2A13_ARATH	78.2	1e-14	F-box protein PP2-A13 OS=Arabidopsis thaliana GN=PP2A13 PE=1 SV=1	--	--	--	--	--	--	--	--	--	--	GO:0006950//response to stress	GO:0005488//binding	-
	Unigene31953	0	0	0	1.77	0	0	0	0	#DIV/0!	#DIV/0!	200	4	1.538	gi|226502364|ref|NP_001150860.1|	80.9	4e-15	dihydrolipoyllysine-residue acetyltransferase component of pyruvatedehydrogenase complex [Zea mays] >gi|195642434|gb|ACG40685.1| dihydrolipoyllysine-residue acetyltransferase component of pyruvatedehydrogenase complex [Zea mays]	sp|Q5M729|OPD23_ARATH	78.6	1e-14	Dihydrolipoyllysine-residue acetyltransferase component 3 of pyruvate dehydrogenase complex, mitochondrial OS=Arabidopsis thaliana GN=At1g54220 PE=1 SV=1	RC0764	69.3	2e-12	COG0508	Pyruvate/2-oxoglutarate dehydrogenase complex, dihydrolipoamide acyltransferase (E2) component, and related enzymes	K00627	2e-16	80.9	zma:100284493	pyruvate dehydrogenase E2 component (dihydrolipoamide acetyltransferase) [EC:2.3.1.12]	GO:0032787	GO:0005488//binding;GO:0016418	GO:0043234//protein complex;GO:0043231//intracellular membrane-bounded organelle
	Unigene32277	83.96	252.62	218	91.69	36.12	6.4	70.66	0	2.23	3.95	201	78	29.8414	gi|20804893|dbj|BAB92574.1|	76.6	8e-14	proline transport protein-like [Oryza sativa Japonica Group]	--	--	--	--	--	--	--	--	--	--	--	--	--	--	GO:0015804//neutral amino acid transport	GO:0015175//neutral amino acid transmembrane transporter activity	GO:0016020//membrane
	Unigene32380	0	0	0	0.88	0	0	0	0	#DIV/0!	#DIV/0!	201	2	0.7652	gi|224126723|ref|XP_002329457.1|	74.7	3e-13	tir-nbs-lrr resistance protein [Populus trichocarpa] >gi|222870137|gb|EEF07268.1| tir-nbs-lrr resistance protein [Populus trichocarpa]	sp|Q40392|TMVRN_NICGU	54.3	2e-07	TMV resistance protein N OS=Nicotiana glutinosa GN=N PE=1 SV=1	--	--	--	--	--	--	--	--	--	--	GO:0006952//defense response;GO:0009987//cellular process	GO:0004872//receptor activity;GO:0000166//nucleotide binding	GO:0044425//membrane part
	Unigene32438	0	110.36	105.62	36.15	1.85	39.33	0	8.52	2.14	4.41	201	8	3.0607	gi|179251196|gb|ACB78187.1|	142	9e-34	chalcone synthase [Senna tora]	sp|P51081|CHSA_PEA	142	5e-34	Chalcone synthase 1A OS=Pisum sativum GN=CHS-1A PE=3 SV=1	--	--	--	--	--	K00660	1e-32	134	pop:POPTR_554829	chalcone synthase [EC:2.3.1.74]	GO:0009699//phenylpropanoid biosynthetic process	GO:0016747//transferase activity, transferring acyl groups other than amino-acyl groups	-
	Unigene32556	0	0	0	0.88	0	0	0	0	#DIV/0!	#DIV/0!	202	3	1.1421	gi|224002959|ref|XP_002291151.1|	76.6	8e-14	RNA splicing factor [Thalassiosira pseudonana CCMP1335] >gi|220972927|gb|EED91258.1| RNA splicing factor [Thalassiosira pseudonana CCMP1335]	sp|O94906|PRP6_HUMAN	110	3e-24	Pre-mRNA-processing factor 6 OS=Homo sapiens GN=PRPF6 PE=1 SV=1	YBR055c	50.1	1e-06	COG0457	FOG: TPR repeat	K12855	6e-18	85.5	ppp:PHYPADRAFT_203777	pre-mRNA-processing factor 6	GO:0005982//starch metabolic process;GO:0000377//RNA splicing, via transesterification reactions with bulged adenosine as nucleophile;GO:0019538//protein metabolic process	GO:0046914//transition metal ion binding;GO:0008235//metalloexopeptidase activity	GO:0009501//amyloplast
	Unigene32628	0	0	0	6.14	0	0.91	0	0	2.25	4.58	202	5	1.9034	gi|226509396|ref|NP_001150632.1|	83.2	8e-16	eukaryotic translation initiation factor 3 subUnit 6 [Zea mays] >gi|195640736|gb|ACG39836.1| eukaryotic translation initiation factor 3 subUnit 6 [Zea mays]	sp|A7RWP6|EIF3E_NEMVE	111	1e-24	Eukaryotic translation initiation factor 3 subUnit E OS=Nematostella vectensis GN=v1g163572 PE=3 SV=1	--	--	--	--	--	K03250	5e-18	85.9	ppp:PHYPADRAFT_199296	translation initiation factor eIF-3 subUnit 6	GO:0010467//gene expression	GO:0008135//translation factor activity, nucleic acid binding	GO:0044424//intracellular part
	Unigene32635	0	0	0	4.39	0	0	0	0	#DIV/0!	#DIV/0!	202	3	1.1421	gi|145341067|ref|XP_001415637.1|	97.4	4e-20	mitochondrial ClpX chaperone [Ostreococcus lucimarinus CCE9901] >gi|144575860|gb|ABO93929.1| mitochondrial ClpX chaperone [Ostreococcus lucimarinus CCE9901]	sp|B8D805|CLPX_BUCAT	135	6e-32	ATP-dependent Clp protease ATP-binding subUnit clpX OS=Buchnera aphidicola subsp. Acyrthosiphon pisum (strain Tuc7) GN=clpX PE=3 SV=1	BU476	135	1e-32	COG1219	ATP-dependent protease Clp, ATPase subUnit	K03544	2e-21	97.4	olu:OSTLU_23955	ATP-dependent Clp protease ATP-binding subUnit ClpX	GO:0006810//transport;GO:0044267//cellular protein metabolic process	GO:0005515//protein binding;GO:0017111//nucleoside-triphosphatase activity;GO:0032559//adenyl ribonucleotide binding	GO:0031980//mitochondrial lumen
	Unigene32648	17.34	41.18	36.15	34.21	13.83	12.74	17.58	17.81	2.09	8.93	202	62	23.6026	gi|280967730|gb|ACZ98536.1|	107	3e-23	protein kinase [Malus x domestica]	sp|O48788|Y2267_ARATH	88.2	1e-17	Probable inactive receptor kinase At2g26730 OS=Arabidopsis thaliana GN=At2g26730 PE=1 SV=1	--	--	--	--	--	--	--	--	--	--	GO:0006464//protein modification process;GO:0007167//enzyme linked receptor protein signaling pathway	GO:0004871//signal transducer activity;GO:0004672//protein kinase activity;GO:0032559//adenyl ribonucleotide binding	GO:0005618//cell wall;GO:0043231//intracellular membrane-bounded organelle;GO:0031224//intrinsic to membrane
	Unigene32652	0	6.86	0	2.63	0	0	0.93	0	3.42	7.2	202	10	3.8069	gi|42570967|ref|NP_973557.1|	96.7	7e-20	ubiquitin fusion degradation UFD1 family protein [Arabidopsis thaliana] >gi|44917441|gb|AAS49045.1| At2g29070 [Arabidopsis thaliana] >gi|45773886|gb|AAS76747.1| At2g29070 [Arabidopsis thaliana] >gi|111609944|gb|ABH11522.1| UFD1c [synthetic construct]	sp|Q55BK0|UFD1_DICDI	60.5	3e-09	Ubiquitin fusion degradation protein 1 homolog OS=Dictyostelium discoideum GN=ufd1 PE=3 SV=1	--	--	--	--	--	--	--	--	--	--	GO:0019941//modification-dependent protein catabolic process	-	-
	Unigene32701	169.45	513.9	490.17	142.11	94.01	39.13	0.93	0	2.25	4.47	202	198	75.3761	gi|6119723|gb|AAF04193.1|AF053638_1	121	3e-27	short-chain alcohol dehydrogenase [Pisum sativum]	sp|Q7FAE1|MOMAS_ORYSJ	62.4	8e-10	Momilactone A synthase OS=Oryza sativa subsp. japonica GN=Os04g0179200 PE=2 SV=1	--	--	--	--	--	K13070	6e-11	62.4	osa:4335093	momilactone-A synthase [EC:1.1.1.295]	GO:0008152//metabolic process	GO:0016491//oxidoreductase activity	-
	Unigene32757	5.49	126.35	117.96	28.81	30.27	45.28	10.13	25.31	2.01	4.23	203	38	14.3949	gi|30689711|ref|NP_849712.1|	95.5	2e-19	KDR (KIDARI); transcription regulator [Arabidopsis thaliana] >gi|28416803|gb|AAO42932.1| At1g26948 [Arabidopsis thaliana]	sp|Q9CA64|BH135_ARATH	80.5	3e-15	Transcription factor bHLH135 OS=Arabidopsis thaliana GN=BHLH135 PE=4 SV=1	--	--	--	--	--	--	--	--	--	--	GO:0048506;GO:0009725//response to hormone stimulus;GO:0010468//regulation of gene expression;GO:0000902//cell morphogenesis;GO:0009639//response to red or far red light	-	GO:0009536//plastid
	Unigene32761	39.21	319.28	336.32	166.73	55.95	4.53	53.39	48.09	4.9	11.16	203	217	82.2023	gi|297845746|ref|XP_002890754.1|	115	2e-25	pyridoxal-dependent decarboxylase family protein [Arabidopsis lyrata subsp. lyrata] >gi|297336596|gb|EFH67013.1| pyridoxal-dependent decarboxylase family protein [Arabidopsis lyrata subsp. lyrata]	sp|Q9C509|SGPL_ARATH	115	8e-26	Sphingosine-1-phosphate lyase OS=Arabidopsis thaliana GN=At1g27980 PE=2 SV=1	YDR294c	60.1	1e-09	COG0076	Glutamate decarboxylase and related PLP-dependent proteins	K01634	2e-27	117	pop:POPTR_1074404	sphinganine-1-phosphate aldolase [EC:4.1.2.27]	GO:0043436;GO:0006665//sphingolipid metabolic process;GO:0006519//cellular amino acid and derivative metabolic process	GO:0048037//cofactor binding;GO:0016832//aldehyde-lyase activity	GO:0043231//intracellular membrane-bounded organelle
	Unigene33016	10.93	434.95	542.81	232.79	7.3	96.42	0.92	14.27	4.18	9.51	204	403	151.913	gi|179251196|gb|ACB78187.1|	145	1e-34	chalcone synthase [Senna tora]	sp|P51089|CHSY_VIGUN	145	7e-35	Chalcone synthase OS=Vigna unguiculata GN=CHS PE=2 SV=1	--	--	--	--	--	K00660	8e-34	138	rcu:RCOM_1020600	chalcone synthase [EC:2.3.1.74]	GO:0009699//phenylpropanoid biosynthetic process	GO:0016747//transferase activity, transferring acyl groups other than amino-acyl groups	-
	Unigene33051	0.78	0.85	1.67	2.61	0	0	0	0	2.19	4.44	204	3	1.1309	gi|75333868|sp|Q9FHK7.1|Y5516_ARATH	68.6	2e-11	RecName: Full=Probable receptor kinase At5g05160; Flags: Precursor >gi|9759257|dbj|BAB09692.1| receptor-like protein kinase [Arabidopsis thaliana] >gi|224589658|gb|ACN59361.1| leucine-rich repeat receptor-like protein kinase [Arabidopsis thaliana]	sp|Q9FHK7|Y5516_ARATH	68.6	1e-11	Probable receptor kinase At5g05160 OS=Arabidopsis thaliana GN=At5g05160 PE=1 SV=1	--	--	--	--	--	--	--	--	--	--	GO:0006464//protein modification process;GO:0007167//enzyme linked receptor protein signaling pathway	GO:0016301//kinase activity;GO:0032559//adenyl ribonucleotide binding	GO:0016020//membrane;GO:0030312//external encapsulating structure
	Unigene33136	0	0	0	10.42	0	0	0	0	#DIV/0!	#DIV/0!	204	8	3.0156	gi|145334819|ref|NP_001078755.1|	50.1	8e-06	ATM2 (ARABIDOPSIS THALIANA MYOSIN 2); motor [Arabidopsis thaliana]	sp|P05661|MYSA_DROME	107	2e-23	Myosin heavy chain, muscle OS=Drosophila melanogaster GN=Mhc PE=1 SV=4	SPCC645.05c	56.2	1e-08	COG5022	Myosin heavy chain	--	--	--	--	--	GO:0030029//actin filament-based process	GO:0015405//P-P-bond-hydrolysis-driven transmembrane transporter activity;GO:0017111//nucleoside-triphosphatase activity;GO:0000166//nucleotide binding	GO:0043231//intracellular membrane-bounded organelle;GO:0016020//membrane;GO:0015629//actin cytoskeleton
	Unigene33155	0.78	39.93	42.46	43.43	10.04	1.8	0.92	0	4.18	9.46	204	27	10.1778	gi|6624705|emb|CAB63844.1|	57.8	4e-08	glutamine synthetase I [Medicago truncatula]	--	--	--	--	--	--	--	--	--	--	--	--	--	--	GO:0006541//glutamine metabolic process	GO:0016211//ammonia ligase activity;GO:0032559//adenyl ribonucleotide binding	-
	Unigene33939	4.59	58.32	64.5	27.26	17.01	0.88	4.49	5.76	2.94	7.1	208	65	24.0309	gi|226499210|ref|NP_001147571.1|	79.7	9e-15	gamma-glutamyltranspeptidase 1 [Zea mays] >gi|195612250|gb|ACG27955.1| gamma-glutamyltranspeptidase 1 precursor [Zea mays]	--	--	--	--	--	--	--	--	--	K00681	2e-21	97.1	pop:POPTR_760175	gamma-glutamyltranspeptidase [EC:2.3.2.2]	GO:0006950//response to stress;GO:0043094//cellular metabolic compound salvage;GO:0006749//glutathione metabolic process	GO:0047635;GO:0016755	GO:0005618//cell wall;GO:0005576//extracellular region;GO:0042579//microbody;GO:0009536//plastid
	Unigene33954	35.21	121.64	102.88	74.12	47.44	20.33	33.24	47.76	2.08	5.5	208	165	61.0015	gi|115475996|ref|NP_001061594.1|	119	1e-26	Os08g0343300 [Oryza sativa Japonica Group] >gi|113623563|dbj|BAF23508.1| Os08g0343300 [Oryza sativa Japonica Group]	--	--	--	--	--	--	--	--	--	K03136	5e-31	129	pop:POPTR_828635	transcription initiation factor TFIIE alpha subUnit	GO:0006352//transcription initiation	GO:0008135//translation factor activity, nucleic acid binding;GO:0030528//transcription regulator activity	GO:0005667//transcription factor complex
	Unigene33967	7.65	69.15	82.47	55.38	25.06	7.95	8.98	11.53	2.75	7.74	208	102	37.71	gi|73656868|gb|AAZ79373.1|	117	3e-26	internal-motor kinesin [Nicotiana tabacum]	sp|Q91637|KIF2A_XENLA	60.8	2e-09	Kinesin-like protein KIF2A OS=Xenopus laevis GN=kif2a PE=2 SV=2	--	--	--	--	--	K10393	6e-29	122	vvi:100240940	kinesin family member 2/24	GO:0007017//microtubule-based process;GO:0000904//cell morphogenesis involved in differentiation	GO:0003774//motor activity;GO:0032559//adenyl ribonucleotide binding	GO:0015630//microtubule cytoskeleton;GO:0044431//Golgi apparatus part;GO:0016020//membrane
	Unigene34076	13.01	184.13	236.79	162.72	45.65	2.65	3.59	4.12	4.26	9.89	208	244	90.2083	gi|297796335|ref|XP_002866052.1|	52.4	2e-06	glycosyl hydrolase family 1 protein [Arabidopsis lyrata subsp. lyrata] >gi|297311887|gb|EFH42311.1| glycosyl hydrolase family 1 protein [Arabidopsis lyrata subsp. lyrata]	sp|Q0DA21|BGL25_ORYSJ	53.5	4e-07	Beta-glucosidase 25 OS=Oryza sativa subsp. japonica GN=BGLU25 PE=2 SV=2	--	--	--	--	--	K01188	2e-07	50.8	ath:AT1G26560	beta-glucosidase [EC:3.2.1.21]	GO:0008152//metabolic process	GO:0004553//hydrolase activity, hydrolyzing O-glycosyl compounds	GO:0005576//extracellular region;GO:0009536//plastid
	Unigene34205	3.81	581.26	311.23	80.55	2.67	19.35	0	2.46	16.76	40.97	209	462	169.987	gi|27728675|gb|AAO18731.1|	118	2e-26	cysteine protease [Gossypium hirsutum]	sp|Q9SUT0|CPR3_ARATH	73.6	4e-13	Probable cysteine proteinase At4g11310 OS=Arabidopsis thaliana GN=At4g11310 PE=2 SV=1	--	--	--	--	--	K01376	3e-14	73.6	ath:AT4G11310	[EC:3.4.22.-]	GO:0019538//protein metabolic process	GO:0016628//oxidoreductase activity, acting on the CH-CH group of donors, NAD or NADP as acceptor;GO:0004175//endopeptidase activity	GO:0031410//cytoplasmic vesicle
	Unigene34349	4.57	138.47	151.15	55.96	10.69	1.76	10.73	3.28	10.74	25.76	209	105	38.6334	gi|2738982|gb|AAB94584.1|	100	7e-21	CYP71A10 [Glycine max]	sp|P24465|C71A1_PERAE	94.7	2e-19	Cytochrome P450 71A1 OS=Persea americana GN=CYP71A1 PE=1 SV=1	--	--	--	--	--	K00517	3e-20	93.2	ath:AT1G13090	[EC:1.14.-.-]	GO:0051707//response to other organism;GO:0002831//regulation of response to biotic stimulus;GO:0009700//indole phytoalexin biosynthetic process;GO:0009725//response to hormone stimulus;GO:0006950//response to stress	GO:0004497//monooxygenase activity;GO:0016831//carboxy-lyase activity;GO:0005506//iron ion binding	GO:0043231//intracellular membrane-bounded organelle;GO:0044425//membrane part;GO:0042598//vesicular fraction
	Unigene34532	2.27	2.48	4.85	20.25	4.43	1.75	0.89	2.45	2.07	5.22	210	11	4.028	gi|115484039|ref|NP_001065681.1|	102	2e-21	Os11g0134900 [Oryza sativa Japonica Group] >gi|113644385|dbj|BAF27526.1| Os11g0134900 [Oryza sativa Japonica Group]	--	--	--	--	--	--	--	--	--	--	--	--	--	--	GO:0006810//transport	-	GO:0044464//cell part
	Unigene34643	6.79	479.66	581.14	136.05	0.88	5.23	0	0	58.75	123.91	211	451	164.367	gi|73661157|dbj|BAE19953.1|	131	2e-30	dihydroflavonol 4-reductase [Lotus japonicus]	sp|Q9XES5|DFRA_MALDO	124	2e-28	Bifunctional dihydroflavonol 4-reductase/flavanone 4-reductase OS=Malus domestica GN=DFR PE=1 SV=1	--	--	--	--	--	K13082	2e-29	124	rcu:RCOM_1595070	bifunctional dihydroflavonol 4-reductase/flavanone 4-reductase [EC:1.1.1.219 1.1.1.234]	GO:0009699//phenylpropanoid biosynthetic process	GO:0048037//cofactor binding;GO:0016616//oxidoreductase activity, acting on the CH-OH group of donors, NAD or NADP as acceptor	-
	Unigene34690	67.91	661.99	694.64	173	179.12	51.4	54.03	0	2.85	6.66	211	729	265.684	gi|124359969|gb|ABN07985.1|	99.8	9e-21	Sterol desaturase [Medicago truncatula]	--	--	--	--	--	--	--	--	--	--	--	--	--	--	GO:0006631//fatty acid metabolic process	GO:0046914//transition metal ion binding;GO:0003824//catalytic activity	GO:0043231//intracellular membrane-bounded organelle;GO:0031224//intrinsic to membrane
	Unigene34694	0	2.46	2.41	2.52	0.88	0	0	0	2.79	5.8	211	12	4.3734	gi|15239544|ref|NP_200218.1|	85.5	2e-16	AT-HSFA9; DNA binding / transcription factor [Arabidopsis thaliana] >gi|75264295|sp|Q9LVW2.1|HSFA9_ARATH RecName: Full=Heat stress transcription factor A-9; Short=AtHsfA9; AltName: Full=AtHsf-21	sp|Q9LVW2|HSFA9_ARATH	85.5	9e-17	Heat stress transcription factor A-9 OS=Arabidopsis thaliana GN=HSFA9 PE=2 SV=1	--	--	--	--	--	--	--	--	--	--	GO:0006351//transcription, DNA-dependent;GO:0050896//response to stimulus	GO:0003677//DNA binding	GO:0043231//intracellular membrane-bounded organelle
	Unigene34831	53.32	432.43	405.36	208.96	96.6	6.07	25.56	13.73	3.61	8.41	212	719	260.803	gi|110739978|dbj|BAF01893.1|	118	2e-26	galactokinase like protein [Arabidopsis thaliana]	--	--	--	--	--	--	--	--	--	K12446	1e-28	121	vvi:100267958	L-arabinokinase [EC:2.7.1.46]	GO:0019321//pentose metabolic process;GO:0016310//phosphorylation;GO:0010467//gene expression;GO:0019318//hexose metabolic process	GO:0016773//phosphotransferase activity, alcohol group as acceptor;GO:0032559//adenyl ribonucleotide binding	GO:0044424//intracellular part
	Unigene35359	0	0	0	6.62	0	0.86	0	0	2.57	5.3	214	7	2.5154	gi|68638039|emb|CAJ00220.1|	56.2	1e-07	P-type ATPase [Pythium aphanidermatum]	sp|Q7PPA5|ATC1_ANOGA	127	3e-29	Calcium-transporting ATPase sarcoplasmic/endoplasmic reticulum type OS=Anopheles gambiae GN=Ca-P60A PE=3 SV=5	--	--	--	--	--	K01537	2e-08	53.9	olu:OSTLU_29095	Ca2+-transporting ATPase [EC:3.6.3.8]	GO:0006811//ion transport	GO:0016820//hydrolase activity, acting on acid anhydrides, catalyzing transmembrane movement of substances	-
	Unigene35579	0	0.81	1.58	2.47	0	0	0	0.8	2.03	4.1	215	2	0.7153	gi|15228044|ref|NP_181826.1|	114	3e-25	aspartyl protease family protein [Arabidopsis thaliana]	sp|Q766C3|NEP1_NEPGR	65.9	7e-11	Aspartic proteinase nepenthesin-1 OS=Nepenthes gracilis GN=nep1 PE=1 SV=1	--	--	--	--	--	K00924	4e-06	46.2	ath:AT5G22850	[EC:2.7.1.-]	GO:0019538//protein metabolic process	GO:0004175//endopeptidase activity	GO:0005576//extracellular region;GO:0031410//cytoplasmic vesicle
	Unigene35582	38.5	91.08	95.58	59.34	30.31	18.81	15.65	5.58	2.13	4.68	215	206	73.6799	gi|297814299|ref|XP_002875033.1|	104	3e-22	mate efflux family protein [Arabidopsis lyrata subsp. lyrata] >gi|297320870|gb|EFH51292.1| mate efflux family protein [Arabidopsis lyrata subsp. lyrata]	sp|Q9LYT3|TT12_ARATH	72	1e-12	Protein TRANSPARENT TESTA 12 OS=Arabidopsis thaliana GN=TT12 PE=2 SV=1	--	--	--	--	--	--	--	--	--	--	GO:0015893//drug transport	GO:0015291//secondary active transmembrane transporter activity	GO:0044464//cell part
	Unigene35586	0	3.22	5.53	5.77	0	0.86	1.74	1.59	2.78	4.8	215	5	1.7883	gi|226504250|ref|NP_001150672.1|	122	2e-27	ADP,ATP carrier protein [Zea mays] >gi|195640988|gb|ACG39962.1| ADP,ATP carrier protein [Zea mays]	sp|O22342|ADT1_GOSHI	120	2e-27	ADP,ATP carrier protein 1, mitochondrial OS=Gossypium hirsutum GN=ANT1 PE=2 SV=1	--	--	--	--	--	K05863	2e-29	123	vvi:100262663	solute carrier family 25 (mitochondrial carrier; adenine nucleotide translocator)	GO:0006810//transport	-	GO:0019866//organelle inner membrane;GO:0031224//intrinsic to membrane
	Unigene35635	0	0	0	25.43	0.86	2.55	0	0	3.32	7.02	216	8	2.8481	gi|300259872|gb|EFJ44096.1|	113	7e-25	component of cytosolic 80S ribosome and 40S small subUnit [Volvox carteri f. nagariensis]	sp|P41042|RS4_DROME	141	1e-33	40S ribosomal protein S4 OS=Drosophila melanogaster GN=RpS4 PE=2 SV=2	YJR145c	114	6e-26	COG1471	Ribosomal protein S4E	K02987	3e-26	113	cme:CMH218C	small subUnit ribosomal protein S4e	GO:0010467//gene expression;GO:0042221//response to chemical stimulus	GO:0003723//RNA binding;GO:0005198//structural molecule activity	GO:0009536//plastid;GO:0033279
	Unigene35913	25.68	91.04	61.05	20.41	7.72	8.47	7.75	7.1	2.24	5.75	217	60	21.2624	gi|92886084|gb|ABE88094.1|	104	3e-22	Sulfotransferase domain [Medicago truncatula]	sp|P52835|F3ST_FLABI	84	3e-16	Flavonol 3-sulfotransferase OS=Flaveria bidentis PE=2 SV=1	--	--	--	--	--	K11821	7e-10	58.9	osa:4341575	desulfoglucosinolate sulfotransferase A/B/C [EC:2.8.2.-]	GO:0009719//response to endogenous stimulus;GO:0031407//oxylipin metabolic process	GO:0008146//sulfotransferase activity	-
	Unigene35980	33.01	66.29	76.7	87.38	24.88	11.01	6.89	18.15	2.33	5.52	217	133	47.1316	gi|116109372|gb|ABJ74170.1|	131	2e-30	histidine kinase 1 [Lupinus albus]	sp|Q54YZ9|DHKJ_DICDI	52	1e-06	Hybrid signal transduction histidine kinase J OS=Dictyostelium discoideum GN=dhkJ PE=3 SV=2	MA2013_2	54.7	4e-08	COG0642	Signal transduction histidine kinase	--	--	--	--	--	GO:0009908//flower development;GO:0006351//transcription, DNA-dependent;GO:0009888//tissue development;GO:0009744//response to sucrose stimulus;GO:0040007//growth;GO:0010260//organ senescence;GO:0009755//hormone-mediated signaling pathway;GO:0006826//iron ion transport;GO:0006970//response to osmotic stress;GO:0006468//protein amino acid phosphorylation;GO:0015996//chlorophyll catabolic process;G…	GO:0004673//protein histidine kinase activity;GO:0019901//protein kinase binding;GO:0016791//phosphatase activity;GO:0032559//adenyl ribonucleotide binding;GO:0004888//transmembrane receptor activity	GO:0016020//membrane;GO:0043231//intracellular membrane-bounded organelle
	Unigene36161	20.45	480.95	705.05	345.46	74.3	5.06	1.71	80.93	6.31	12.39	218	852	300.541	gi|23193176|gb|AAN14411.1|	122	2e-27	monofunctional lysine-ketoglutarate reductase 1 [Gossypium hirsutum] >gi|23193178|gb|AAN14412.1| monofunctional lysine-ketoglutarate reductase 2 [Gossypium hirsutum]	sp|Q9SMZ4|AASS_ARATH	120	2e-27	Alpha-aminoadipic semialdehyde synthase OS=Arabidopsis thaliana GN=LKR/SDH PE=1 SV=1	--	--	--	--	--	--	--	--	--	--	GO:0008152//metabolic process	GO:0004753//saccharopine dehydrogenase activity	GO:0043231//intracellular membrane-bounded organelle
	Unigene36178	0	2.38	0	0	0	0	0	0	#DIV/0!	#DIV/0!	218	2	0.7055	gi|1946267|emb|CAA72218.1|	135	1e-31	myb [Oryza sativa (japonica cultivar-group)]	sp|P20026|MYB1_HORVU	115	1e-25	Myb-related protein Hv1 OS=Hordeum vulgare GN=MYB1 PE=2 SV=1	ECU11g1690	76.3	1e-14	COG5147	Myb superfamily proteins, including transcription factors and mRNA splicing factors	K09422	9e-33	134	ath:AT4G28110	myb proto-oncogene protein, plant	GO:0009725//response to hormone stimulus;GO:0009743//response to carbohydrate stimulus;GO:0010468//regulation of gene expression;GO:0040007//growth;GO:0006970//response to osmotic stress;GO:0006351//transcription, DNA-dependent;GO:0007275//multicellular organismal development;GO:0006109//regulation of carbohydrate metabolic process	GO:0003676//nucleic acid binding;GO:0016741//transferase activity, transferring one-carbon groups	GO:0043231//intracellular membrane-bounded organelle
	Unigene36190	0	2.38	4.67	0	0	0	0.86	0	2.75	5.69	218	5	1.7637	gi|218117597|dbj|BAH03206.1|	92.8	1e-18	peroxisomal isocitrate lyase 2 [Glycine max]	sp|P45457|ACEA2_SOYBN	92.8	6e-19	Isocitrate lyase 2 (Fragment) OS=Glycine max GN=ICL2 PE=2 SV=1	YER065c	47	9e-06	COG2224	Isocitrate lyase	K01637	6e-19	89	rcu:RCOM_1362920	isocitrate lyase [EC:4.1.3.1]	GO:0009060//aerobic respiration;GO:0043436;GO:0044262//cellular carbohydrate metabolic process	GO:0005488//binding;GO:0016833//oxo-acid-lyase activity	GO:0005777//peroxisome
	Unigene36270	0	0	0	21.04	0	3.36	0	0	2.09	4.22	219	8	2.8091	gi|226499354|ref|NP_001147027.1|	106	9e-23	polyubiquitin containing 7 ubiquitin monomers [Zea mays] >gi|195606596|gb|ACG25128.1| polyubiquitin containing 7 ubiquitin monomers [Zea mays]	sp|P42739|UBIQ_ACECL	103	2e-22	Ubiquitin OS=Acetabularia cliftonii PE=3 SV=1	YLL039c	103	1e-22	COG5272	Ubiquitin	K02977	1e-23	104	osa:4337883	small subUnit ribosomal protein S27Ae	GO:0010467//gene expression	GO:0005198//structural molecule activity	GO:0043231//intracellular membrane-bounded organelle;GO:0030529//ribonucleoprotein complex
	Unigene36305	31.26	161.43	153.55	55.83	58.66	10.07	0	0.78	2.11	4.15	219	148	51.9682	gi|269999990|gb|ACZ57923.1|	77	6e-14	DnaJ-like protein [Glycine max]	--	--	--	--	--	--	--	--	--	--	--	--	--	--	GO:0044267//cellular protein metabolic process	GO:0005515//protein binding	GO:0043231//intracellular membrane-bounded organelle
	Unigene37847	0	3.82	11.97	4.68	0	0	0	0	#DIV/0!	#DIV/0!	227	6	2.0326	gi|105922963|gb|ABF81447.1|	70.9	4e-12	NBS type disease resistance protein [Populus trichocarpa]	--	--	--	--	--	--	--	--	--	--	--	--	--	--	GO:0006810//transport;GO:0044238//primary metabolic process;GO:0044260	GO:0003676//nucleic acid binding;GO:0004672//protein kinase activity;GO:0046872//metal ion binding;GO:0000166//nucleotide binding	GO:0016020//membrane
	Unigene37932	38.4	335.96	312.11	170.21	68.59	26.61	54.91	33.81	3.98	13.4	228	395	133.224	gi|124359706|gb|ABN06062.1|	140	6e-33	Chromosome-associated kinesin KIF4A , related [Medicago truncatula]	--	--	--	--	--	--	--	--	--	--	--	--	--	--	GO:0007017//microtubule-based process;GO:0030198//extracellular matrix organization	GO:0003774//motor activity;GO:0032559//adenyl ribonucleotide binding	GO:0015630//microtubule cytoskeleton
	Unigene38099	19.47	51.46	47.46	48.75	8.13	0	4.9	0	2.53	5.32	229	110	36.9383	gi|167962162|dbj|BAG09370.1|	131	3e-30	peroxisomal fatty acid beta-oxidation multifunctional protein [Glycine max]	sp|Q39659|MFPA_CUCSA	100	4e-21	Glyoxysomal fatty acid beta-oxidation multifunctional protein MFP-a OS=Cucumis sativus PE=1 SV=1	--	--	--	--	--	K10527	6e-27	115	osa:4326503	enoyl-CoA hydratase/3-hydroxyacyl-CoA dehydrogenase [EC:4.2.1.17 1.1.1.35 1.1.1.211]	GO:0009062//fatty acid catabolic process	GO:0016863//intramolecular oxidoreductase activity, transposing C=C bonds;GO:0016616//oxidoreductase activity, acting on the CH-OH group of donors, NAD or NADP as acceptor;GO:0004386//helicase activity;GO:0048037//cofactor binding;GO:0032559//adenyl ribonucleotide binding;GO:0016836//hydro-lyase activity;GO:0016856	GO:0030312//external encapsulating structure;GO:0005777//peroxisome;GO:0031981//nuclear lumen;GO:0031410//cytoplasmic vesicle
	Unigene38144	4.17	35.57	37.82	2.32	1.63	1.61	4.08	4.49	5.62	15.22	229	32	10.7457	gi|224120568|ref|XP_002318362.1|	127	4e-29	multidrug resistance protein ABC transporter family [Populus trichocarpa] >gi|222859035|gb|EEE96582.1| multidrug resistance protein ABC transporter family [Populus trichocarpa]	sp|Q9LYS2|AB10C_ARATH	112	7e-25	ABC transporter C family member 10 OS=Arabidopsis thaliana GN=ABCC10 PE=2 SV=1	YDR135c	74.7	4e-14	COG1132	ABC-type multidrug transport system, ATPase and permease components	K05666	2e-13	70.9	olu:OSTLU_35503	ATP-binding cassette, subfamily C (CFTR/MRP), member 2	GO:0006810//transport;GO:0008152//metabolic process	GO:0015405//P-P-bond-hydrolysis-driven transmembrane transporter activity;GO:0016628//oxidoreductase activity, acting on the CH-CH group of donors, NAD or NADP as acceptor;GO:0017111//nucleoside-triphosphatase activity;GO:0032559//adenyl ribonucleotide binding	GO:0031224//intrinsic to membrane
	Unigene38288	0.69	66.31	69.41	19.26	0	2.4	1.62	0	21.54	48.23	230	75	25.0757	gi|224064438|ref|XP_002301476.1|	74.3	4e-13	multidrug resistance protein ABC transporter family [Populus trichocarpa] >gi|222843202|gb|EEE80749.1| multidrug resistance protein ABC transporter family [Populus trichocarpa]	sp|Q7DM58|AB4C_ARATH	52.4	9e-07	ABC transporter C family member 4 OS=Arabidopsis thaliana GN=ABCC4 PE=1 SV=2	--	--	--	--	--	--	--	--	--	--	GO:0009987//cellular process;GO:0006810//transport;GO:0051707//response to other organism;GO:0006950//response to stress	GO:0017111//nucleoside-triphosphatase activity;GO:0051183//vitamin transporter activity	GO:0031090//organelle membrane;GO:0005773//vacuole
	Unigene38396	23.53	293.86	360.35	245	112.52	10.39	3.25	10.43	2.66	5.87	230	300	100.303	gi|33235471|emb|CAE17327.1|	140	3e-33	lipoxygenase [Fragaria x ananassa]	sp|Q9LUW0|LOX5_ARATH	137	2e-32	Lipoxygenase 5, chloroplastic OS=Arabidopsis thaliana GN=LOX5 PE=1 SV=2	--	--	--	--	--	K00454	1e-33	137	ath:AT3G22400	lipoxygenase [EC:1.13.11.12]	GO:0006633//fatty acid biosynthetic process;GO:0048527//lateral root development	GO:0046914//transition metal ion binding;GO:0016702//oxidoreductase activity, acting on single donors with incorporation of molecular oxygen, incorporation of two atoms of oxygen	-
	Unigene38412	42.22	363.93	424.59	296.62	149.75	12.79	6.5	6.7	2.42	5.2	230	354	118.357	gi|297830958|ref|XP_002883361.1|	139	1e-32	lipoxygenase [Arabidopsis lyrata subsp. lyrata] >gi|297329201|gb|EFH59620.1| lipoxygenase [Arabidopsis lyrata subsp. lyrata]	sp|Q9LUW0|LOX5_ARATH	134	2e-31	Lipoxygenase 5, chloroplastic OS=Arabidopsis thaliana GN=LOX5 PE=1 SV=2	--	--	--	--	--	K00454	1e-32	134	ath:AT3G22400	lipoxygenase [EC:1.13.11.12]	GO:0006633//fatty acid biosynthetic process;GO:0048527//lateral root development	GO:0046914//transition metal ion binding;GO:0016702//oxidoreductase activity, acting on single donors with incorporation of molecular oxygen, incorporation of two atoms of oxygen	-
	Unigene38427	0	9.75	13.23	3.07	1.61	1.59	1.62	1.48	5.37	10.5	231	5	1.6645	gi|67077812|dbj|BAD99507.1|	134	2e-31	gibberellin 2-oxidase [Vigna angularis]	sp|Q9XG83|G2OX_PHACN	134	1e-31	Gibberellin 2-beta-dioxygenase OS=Phaseolus coccineus GN=GA2OX1 PE=2 SV=1	PA0147	53.9	7e-08	COG3491	Isopenicillin N synthase and related dioxygenases	K04125	4e-28	119	ath:AT1G78440	gibberellin 2-oxidase [EC:1.14.11.13]	GO:0008152//metabolic process	GO:0046914//transition metal ion binding;GO:0016706//oxidoreductase activity, acting on paired donors, with incorporation or reduction of molecular oxygen, 2-oxoglutarate as one donor, and incorporation of one atom each of oxygen into both donors;GO:0016701//oxidoreductase activity, acting on single donors with incorporation of molecular oxygen	-
	Unigene38475	37.9	218.31	302.91	191.01	48.36	2.39	14.56	14.83	4.91	11.32	231	314	104.529	gi|84514173|gb|ABC59095.1|	159	1e-38	cytochrome P450 monooxygenase CYP704G7 [Medicago truncatula]	sp|Q50EK3|C04C1_PINTA	117	3e-26	Cytochrome P450 704C1 OS=Pinus taeda GN=CYP704C1 PE=2 SV=1	--	--	--	--	--	K00517	1e-20	94.4	ath:AT5G23190	[EC:1.14.-.-]	GO:0008152//metabolic process	GO:0016491//oxidoreductase activity;GO:0005506//iron ion binding	-
	Unigene38532	1.38	8.25	2.21	2.3	0	0	0	0.74	3.09	6.15	231	5	1.6645	gi|89179406|gb|ABD63142.1|	74.3	4e-13	Retrotransposon gag protein [Asparagus officinalis]	--	--	--	--	--	--	--	--	--	--	--	--	--	--	GO:0006259//DNA metabolic process;GO:0019538//protein metabolic process	GO:0004175//endopeptidase activity;GO:0003676//nucleic acid binding	-
	Unigene38553	22.05	109.53	180.13	247.01	78.18	32.63	10.52	25.21	2.29	5.56	231	438	145.808	gi|1223916|gb|AAA92062.1|	159	9e-39	serine carboxypeptidase [Vigna radiata]	sp|Q56WF8|SCP48_ARATH	145	1e-34	Serine carboxypeptidase-like 48 OS=Arabidopsis thaliana GN=SCPL48 PE=2 SV=2	SPBC16G5.09	56.6	1e-08	COG2939	Carboxypeptidase C (cathepsin A)	K01289	7e-36	145	ath:AT3G45010	carboxypeptidase [EC:3.4.16.-]	GO:0019538//protein metabolic process	GO:0004180//carboxypeptidase activity	GO:0043231//intracellular membrane-bounded organelle
	Unigene38584	61.07	301.78	313.32	154.29	79.45	4.75	34.64	56.11	3.23	7.32	232	395	130.927	gi|19570308|dbj|BAB86281.1|	139	1e-32	3-methylcrotonyl CoA carboxylase [Pisum sativum]	sp|Q42777|MCCA_SOYBN	125	1e-28	Methylcrotonoyl-CoA carboxylase subUnit alpha, mitochondrial OS=Glycine max GN=MCCA PE=1 SV=2	--	--	--	--	--	K01968	4e-24	106	pop:POPTR_559591	3-methylcrotonyl-CoA carboxylase alpha subUnit [EC:6.4.1.4]	GO:0006551//leucine metabolic process	GO:0019842//vitamin binding;GO:0004672//protein kinase activity;GO:0046914//transition metal ion binding;GO:0016421//CoA carboxylase activity;GO:0032559//adenyl ribonucleotide binding	GO:0031980//mitochondrial lumen;GO:0005840//ribosome
	Unigene38639	30.88	73.2	71.74	64.16	25.68	9.51	9.67	12.55	2.26	5.23	232	153	50.7135	gi|116109353|gb|ABJ74169.1|	135	1e-31	histidine kinase 1 [Medicago sativa]	sp|P59342|BARA_SHIFL	66.2	6e-11	Signal transduction histidine-protein kinase barA OS=Shigella flexneri GN=barA PE=3 SV=1	MA2013_2	69.7	1e-12	COG0642	Signal transduction histidine kinase	K00936	4e-07	49.7	osa:4333832	[EC:2.7.3.-]	GO:0009908//flower development;GO:0006351//transcription, DNA-dependent;GO:0009888//tissue development;GO:0009744//response to sucrose stimulus;GO:0040007//growth;GO:0010260//organ senescence;GO:0009755//hormone-mediated signaling pathway;GO:0006826//iron ion transport;GO:0006970//response to osmotic stress;GO:0006468//protein amino acid phosphorylation;GO:0015996//chlorophyll catabolic process;G…	GO:0004673//protein histidine kinase activity;GO:0019901//protein kinase binding;GO:0016791//phosphatase activity;GO:0032559//adenyl ribonucleotide binding;GO:0004888//transmembrane receptor activity	GO:0016020//membrane;GO:0043231//intracellular membrane-bounded organelle
	Unigene3867	6.26	49.95	68.97	23.21	0	8.03	7.34	5.98	5.9	13.1	229	31	10.4099	gi|224064438|ref|XP_002301476.1|	73.2	9e-13	multidrug resistance protein ABC transporter family [Populus trichocarpa] >gi|222843202|gb|EEE80749.1| multidrug resistance protein ABC transporter family [Populus trichocarpa]	sp|Q9LZJ5|AB14C_ARATH	66.6	4e-11	ABC transporter C family member 14 OS=Arabidopsis thaliana GN=ABCC14 PE=1 SV=1	--	--	--	--	--	--	--	--	--	--	GO:0009987//cellular process;GO:0006810//transport;GO:0051707//response to other organism;GO:0006950//response to stress	GO:0017111//nucleoside-triphosphatase activity;GO:0051183//vitamin transporter activity	GO:0031090//organelle membrane;GO:0005773//vacuole
	Unigene3880	1.48	15.02	27.34	3.29	0	1.14	0	0	10.29	20.22	323	31	7.3804	gi|297830640|ref|XP_002883202.1|	84	5e-16	vacuolar sorting protein 9 domain-containing protein [Arabidopsis lyrata subsp. lyrata] >gi|297329042|gb|EFH59461.1| vacuolar sorting protein 9 domain-containing protein [Arabidopsis lyrata subsp. lyrata]	--	--	--	--	--	--	--	--	--	--	--	--	--	--	GO:0000911//cytokinesis by cell plate formation;GO:0009791//post-embryonic development	GO:0005088//Ras guanyl-nucleotide exchange factor activity	GO:0043231//intracellular membrane-bounded organelle;GO:0044444//cytoplasmic part
	Unigene38829	32.11	144.29	148.7	73.01	26.37	24.46	8.02	0	3.8	7.66	233	138	45.5453	gi|2739046|gb|AAB94599.1|	133	5e-31	polyphosphoinositide binding protein Ssh2p [Glycine max]	--	--	--	--	--	--	--	--	--	--	--	--	--	--	GO:0051234//establishment of localization	-	-
	Unigene39354	8.09	96.2	166.24	175.7	58.38	12.46	7.13	12.34	2.5	5.81	236	144	46.9214	gi|87162873|gb|ABD28668.1|	120	4e-27	Peptidase C14, caspase catalytic subUnit p20 [Medicago truncatula]	sp|Q9FYE1|MCA9_ARATH	89.7	5e-18	Metacaspase-9 OS=Arabidopsis thaliana GN=AMC9 PE=1 SV=1	--	--	--	--	--	--	--	--	--	--	GO:0019538//protein metabolic process	GO:0004175//endopeptidase activity	GO:0005576//extracellular region
	Unigene39376	0	0	0	3.75	0	0	0	0	#DIV/0!	#DIV/0!	236	4	1.3034	gi|15233440|ref|NP_195326.1|	73.6	7e-13	CSDP1 (cold shock domain protein 1); RNA binding / double-stranded DNA binding / nucleic acid binding / single-stranded DNA binding [Arabidopsis thaliana] >gi|3036806|emb|CAA18496.1| glycine-rich protein [Arabidopsis thaliana] >gi|7270554|emb|CAB81511.1| glycine-rich protein [Arabidopsis thaliana] >gi|110741941|dbj|BAE98911.1| glycine-rich protein [Arabidopsis thaliana]	sp|Q8T8R1|Y3800_DROME	97.4	2e-20	CCHC-type zinc finger protein CG3800 OS=Drosophila melanogaster GN=CG3800 PE=1 SV=1	SPAC13D6.02c	64.3	5e-11	COG5082	Arginine methyltransferase-interacting protein, contains RING Zn-finger	K09250	3e-14	73.6	ath:AT4G36020	cellular nucleic acid-binding protein	GO:0009987//cellular process	GO:0003677//DNA binding	GO:0043231//intracellular membrane-bounded organelle
	Unigene39387	93.09	439.13	545.49	289.08	81.26	9.35	3.96	0	4.56	8.48	236	207	67.4494	gi|184097798|gb|ACC66315.1|	56.6	2e-18	transcriptional factor NAC11 [Glycine max]	sp|Q9ZNU2|NAC18_ARATH	52.8	4e-15	NAC domain-containing protein 18 OS=Arabidopsis thaliana GN=NAC018 PE=2 SV=1	--	--	--	--	--	--	--	--	--	--	GO:0010468//regulation of gene expression	GO:0003676//nucleic acid binding	-
	Unigene39501	0.67	5.85	2.87	6.73	0.79	0.78	0	0	6.55	11.46	237	5	1.6223	gi|297838723|ref|XP_002887243.1|	162	1e-39	MYB105 [Arabidopsis lyrata subsp. lyrata] >gi|297333084|gb|EFH63502.1| MYB105 [Arabidopsis lyrata subsp. lyrata]	sp|Q9FDW1|MYB44_ARATH	100	4e-21	Transcription factor MYB44 OS=Arabidopsis thaliana GN=MYB44 PE=2 SV=1	ECU11g1690	79.3	2e-15	COG5147	Myb superfamily proteins, including transcription factors and mRNA splicing factors	K09422	7e-41	161	ath:AT1G26780	myb proto-oncogene protein, plant	GO:0010468//regulation of gene expression;GO:0010160//formation of organ boundary	GO:0003676//nucleic acid binding	GO:0043231//intracellular membrane-bounded organelle
	Unigene3960	14.69	894.64	601	413.25	48.78	2.71	0	0	13.04	29.99	271	681	193.24	gi|37780045|gb|AAP32195.1|	102	2e-21	cysteine protease 5 [Trifolium repens]	sp|O23791|BROM1_ANACO	49.7	6e-06	Fruit bromelain OS=Ananas comosus PE=1 SV=1	--	--	--	--	--	K01376	3e-06	47	ath:AT3G49340	[EC:3.4.22.-]	GO:0019538//protein metabolic process	GO:0004175//endopeptidase activity	-
	Unigene39677	0	16.82	5.02	23.93	0	0.78	0.79	0	19.34	34.88	237	33	10.7074	gi|224163958|ref|XP_002338622.1|	72.4	1e-12	cytochrome P450 [Populus trichocarpa] >gi|222873041|gb|EEF10172.1| cytochrome P450 [Populus trichocarpa]	sp|O49858|C82A3_SOYBN	68.2	2e-11	Cytochrome P450 82A3 OS=Glycine max GN=CYP82A3 PE=2 SV=1	--	--	--	--	--	K00517	3e-07	50.1	ath:AT4G31940	[EC:1.14.-.-]	GO:0008152//metabolic process	GO:0016491//oxidoreductase activity;GO:0005506//iron ion binding	-
	Unigene4010	0	0	0	7.63	0	0	0	0	#DIV/0!	#DIV/0!	418	29	5.3351	gi|301090036|ref|XP_002895253.1|	62.8	1e-09	DNA-directed RNA polymerase II largest subUnit [Phytophthora infestans T30-4] >gi|262101000|gb|EEY59052.1| DNA-directed RNA polymerase II largest subUnit [Phytophthora infestans T30-4]	sp|P13238|VTU2_DROME	68.2	2e-11	Vitelline membrane protein Vm26Ab OS=Drosophila melanogaster GN=Vm26Ab PE=1 SV=2	SPBC28F2.12	50.8	7e-07	COG0086	DNA-directed RNA polymerase, beta' subUnit/160 kD subUnit	K03006	4e-11	63.5	olu:OSTLU_26100	DNA-directed RNA polymerase II subUnit A [EC:2.7.7.6]	GO:0009987//cellular process	GO:0016740//transferase activity	-
	Unigene4073	0	5.05	4.12	0.86	0	0	0	0.83	4.02	8.54	206	7	2.6131	gi|140056460|gb|ABO81153.1|	70.9	2e-16	Polynucleotidyl transferase, Ribonuclease H fold [Medicago truncatula]	--	--	--	--	--	--	--	--	--	--	--	--	--	--	GO:0006260//DNA replication;GO:0006325//chromatin organization;GO:0006464//protein modification process	GO:0003676//nucleic acid binding;GO:0004672//protein kinase activity;GO:0004175//endopeptidase activity;GO:0046914//transition metal ion binding;GO:0034061;GO:0030246//carbohydrate binding;GO:0032559//adenyl ribonucleotide binding	GO:0043231//intracellular membrane-bounded organelle;GO:0044427//chromosomal part
	Unigene40888	0	2.84	6.26	0.73	1.53	0	0	0	2.15	4.35	244	6	1.891	gi|147857338|emb|CAN79196.1|	66.6	8e-11	hypothetical protein [Vitis vinifera]	--	--	--	--	--	--	--	--	--	--	--	--	--	--	GO:0006259//DNA metabolic process	GO:0003676//nucleic acid binding	-
	Unigene40944	37.04	153.49	178.15	38.33	17.48	55.52	18.31	13.28	2.22	5.35	245	256	80.3515	gi|15186732|dbj|BAB62890.1|	151	2e-36	aspartic proteinase 1 [Glycine max]	sp|O04057|ASPR_CUCPE	140	2e-33	Aspartic proteinase OS=Cucurbita pepo PE=2 SV=1	--	--	--	--	--	K08245	3e-35	143	rcu:RCOM_1303660	phytepsin [EC:3.4.23.40]	GO:0019538//protein metabolic process	GO:0004175//endopeptidase activity	GO:0043231//intracellular membrane-bounded organelle
	Unigene41155	1.29	177.53	79.39	150.55	3.78	0	1.52	0.7	35.89	94.15	246	126	39.3872	gi|157416233|gb|ABV54754.1|	152	9e-37	beta-glucosidase-like protein [Trifolium repens]	sp|P26205|BGLT_TRIRP	147	3e-35	Cyanogenic beta-glucosidase (Fragment) OS=Trifolium repens GN=LI PE=1 SV=1	CAC0385	95.9	2e-20	COG2723	Beta-glucosidase/6-phospho-beta-glucosidase/beta-galactosidase	K01188	3e-32	133	osa:4336146	beta-glucosidase [EC:3.2.1.21]	GO:0044238//primary metabolic process	GO:0043167//ion binding;GO:0015926//glucosidase activity	GO:0031410//cytoplasmic vesicle
	Unigene41220	245.27	766.47	808.44	513.59	301.22	216.71	163.33	167.8	2.31	8.32	246	650	203.188	gi|167963384|dbj|BAG09380.1|	149	7e-36	peroxisomal 3-ketoacyl-CoA thiolase precursor [Glycine max]	sp|Q56WD9|THIK2_ARATH	139	4e-33	3-ketoacyl-CoA thiolase 2, peroxisomal OS=Arabidopsis thaliana GN=PED1 PE=1 SV=2	YIL160c	63.5	9e-11	COG0183	Acetyl-CoA acetyltransferase	K00632	3e-34	139	ath:AT2G33150	acetyl-CoA acyltransferase [EC:2.3.1.16]	GO:0009694//jasmonic acid metabolic process;GO:0009062//fatty acid catabolic process;GO:0009657//plastid organization;GO:0006950//response to stress	GO:0016408	GO:0031981//nuclear lumen;GO:0009536//plastid;GO:0042579//microbody;GO:0016020//membrane
	Unigene41263	45.3	426.21	391.45	198.81	51.46	2.24	15.95	17.41	6.58	14.89	246	770	240.7	gi|222424859|dbj|BAH20381.1|	119	1e-26	AT4G16130 [Arabidopsis thaliana]	--	--	--	--	--	--	--	--	--	K12446	5e-28	119	ath:AT4G16130	L-arabinokinase [EC:2.7.1.46]	GO:0019321//pentose metabolic process;GO:0010467//gene expression;GO:0006796//phosphate metabolic process	GO:0016773//phosphotransferase activity, alcohol group as acceptor;GO:0032559//adenyl ribonucleotide binding	GO:0043231//intracellular membrane-bounded organelle
	Unigene424	39.51	189	130.45	113	29.34	22.98	43.67	38.17	3.3	13.04	552	171	23.8219	gi|75303404|sp|Q8S3J3.1|HIUH_SOYBN	300	5e-81	RecName: Full=Hydroxyisourate hydrolase; Short=HIU hydrolase; Short=HIUHase; Flags: Precursor >gi|19569603|gb|AAL92115.1|AF486839_1 hydroxyisourate hydrolase [Glycine max]	sp|Q8S3J3|HIUH_SOYBN	300	3e-81	Hydroxyisourate hydrolase OS=Glycine max GN=HIUH PE=1 SV=1	lin0297	200	1e-51	COG2723	Beta-glucosidase/6-phospho-beta-glucosidase/beta-galactosidase	K01188	1e-65	245	osa:4338560	beta-glucosidase [EC:3.2.1.21]	GO:0009112	GO:0015926//glucosidase activity;GO:0016812//hydrolase activity, acting on carbon-nitrogen (but not peptide) bonds, in cyclic amides;GO:0043167//ion binding	GO:0044439//peroxisomal part;GO:0031224//intrinsic to membrane
	Unigene42857	0.62	6.12	11.32	0.69	0	0.72	0.73	0	8.25	14.75	255	6	1.8094	gi|224081875|ref|XP_002306511.1|	138	2e-32	endoplasmic reticulum [ER]-type calcium ATPase [Populus trichocarpa] >gi|222855960|gb|EEE93507.1| endoplasmic reticulum [ER]-type calcium ATPase [Populus trichocarpa]	sp|P0ABB8|ATMA_ECOLI	94	3e-19	Magnesium-transporting ATPase, P-type 1 OS=Escherichia coli (strain K12) GN=mgtA PE=1 SV=1	lin2836	95.1	3e-20	COG0474	Cation transport ATPase	K01531	8e-35	141	vvi:100250051	Mg2+-importing ATPase [EC:3.6.3.2]	GO:0009206	GO:0015662//ATPase activity, coupled to transmembrane movement of ions, phosphorylative mechanism;GO:0032559//adenyl ribonucleotide binding	GO:0031224//intrinsic to membrane
	Unigene4292	0.44	14.66	16.49	13.27	3.62	1.02	1.3	6.65	2.23	4.76	721	142	15.1451	gi|94442475|gb|ABF19025.1|	146	2e-34	At5g40690 [Arabidopsis thaliana]	sp|Q8MP30|Y7791_DICDI	82.4	3e-15	Uncharacterized histidine-rich protein DDB_G0274557 OS=Dictyostelium discoideum GN=DDB_G0274557 PE=4 SV=1	XF1267	60.1	4e-09	COG5297	Cellobiohydrolase A (1,4-beta-cellobiosidase A)	K03295	3e-06	48.9	ath:AT2G04620	cation efflux system protein, CDF family	GO:0045333//cellular respiration	-	-
	Unigene42920	34.2	396.02	624.94	256.8	114.18	30.16	71.54	34.12	3.73	10.19	256	545	163.71	gi|256773105|dbj|BAI22477.1|	150	3e-36	delta 1-pyrroline-5-carboxylate synthase [Vigna unguiculata]	sp|P54887|P5CS1_ARATH	142	8e-34	Delta-1-pyrroline-5-carboxylate synthase A OS=Arabidopsis thaliana GN=P5CSA PE=1 SV=1	Cgl2305	63.9	7e-11	COG0263	Glutamate 5-kinase	K12657	6e-35	142	ath:AT2G39800	delta-1-pyrroline-5-carboxylate synthetase [EC:2.7.2.11 1.2.1.41]	GO:0006560//proline metabolic process	GO:0016620//oxidoreductase activity, acting on the aldehyde or oxo group of donors, NAD or NADP as acceptor;GO:0016774//phosphotransferase activity, carboxyl group as acceptor	GO:0044424//intracellular part
	Unigene43017	0	0	0	1.38	0	0	0	0	#DIV/0!	#DIV/0!	256	4	1.2015	gi|1556380|emb|CAA59010.1|	122	1e-27	citrate (si)-synthase [Beta vulgaris subsp. vulgaris]	sp|Q16P20|CISY2_AEDAE	155	1e-37	Probable citrate synthase 2, mitochondrial OS=Aedes aegypti GN=AAEL011789 PE=3 SV=1	SPAC6C3.04	127	5e-30	COG0372	Citrate synthase	K01647	1e-29	124	ppp:PHYPADRAFT_140151	citrate synthase [EC:2.3.3.1]	GO:0010038//response to metal ion;GO:0005975//carbohydrate metabolic process;GO:0009060//aerobic respiration	GO:0046912//transferase activity, transferring acyl groups, acyl groups converted into alkyl on transfer;GO:0016747//transferase activity, transferring acyl groups other than amino-acyl groups;GO:0046914//transition metal ion binding;GO:0032559//adenyl ribonucleotide binding	GO:0031980//mitochondrial lumen;GO:0030312//external encapsulating structure;GO:0009536//plastid
	Unigene43037	1.24	31.14	26.54	8.31	0.73	0	3.65	1.34	6.03	15.04	256	5	1.5019	gi|224139378|ref|XP_002323083.1|	122	1e-27	cytochrome P450 [Populus trichocarpa] >gi|222867713|gb|EEF04844.1| cytochrome P450 [Populus trichocarpa]	sp|P24465|C71A1_PERAE	115	6e-26	Cytochrome P450 71A1 OS=Persea americana GN=CYP71A1 PE=1 SV=1	alr1450	67	8e-12	COG2124	Cytochrome P450	K00517	3e-21	96.7	ath:AT3G26230	[EC:1.14.-.-]	GO:0003006//reproductive developmental process;GO:0008152//metabolic process	GO:0016491//oxidoreductase activity;GO:0005506//iron ion binding	GO:0042598//vesicular fraction;GO:0031090//organelle membrane;GO:0043231//intracellular membrane-bounded organelle;GO:0031224//intrinsic to membrane
	Unigene43114	148.05	319.63	362.14	391.64	167.35	35.76	42.9	32.66	2.14	4.1	257	500	149.609	gi|30687142|ref|NP_850851.1|	92.8	1e-18	heavy-metal-associated domain-containing protein [Arabidopsis thaliana] >gi|238481311|ref|NP_001154719.1| heavy-metal-associated domain-containing protein [Arabidopsis thaliana]	sp|Q8I3Z1|MLRR1_PLAF7	54.7	2e-07	MATH and LRR domain-containing protein PFE0570w OS=Plasmodium falciparum (isolate 3D7) GN=PFE0570w PE=2 SV=1	YOR054c	50.4	8e-07	COG0452	Phosphopantothenoylcysteine synthetase/decarboxylase	K11279	3e-07	50.1	olu:OSTLU_41877	nucleosome assembly protein 1-like 1	GO:0006812//cation transport	GO:0005198//structural molecule activity;GO:0043169//cation binding	GO:0030312//external encapsulating structure
	Unigene43215	0	13.49	3.3	2.76	1.45	2.15	0	1.33	3.04	5.81	257	19	5.6851	gi|3834451|gb|AAC70951.1|	74.7	3e-13	polygalacturonase 7 [Solanum lycopersicum]	sp|P48979|PGLR_PRUPE	66.2	6e-11	Polygalacturonase OS=Prunus persica PE=2 SV=1	--	--	--	--	--	K01184	4e-13	69.7	ath:AT3G59850	polygalacturonase [EC:3.2.1.15]	GO:0044238//primary metabolic process	GO:0004553//hydrolase activity, hydrolyzing O-glycosyl compounds	-
	Unigene43278	30.24	75.23	86.89	101.65	20.21	34.2	23.18	4.65	2.57	5.73	258	179	53.3523	gi|14970841|emb|CAC44501.1|	91.7	2e-18	beta-galactosidase [Fragaria x ananassa]	sp|Q9SCV4|BGAL8_ARATH	80.5	3e-15	Beta-galactosidase 8 OS=Arabidopsis thaliana GN=BGAL8 PE=2 SV=2	--	--	--	--	--	K01190	1e-12	67.8	ath:AT3G52840	beta-galactosidase [EC:3.2.1.23]	GO:0044238//primary metabolic process	GO:0030246//carbohydrate binding;GO:0043167//ion binding;GO:0015925	GO:0031410//cytoplasmic vesicle;GO:0030312//external encapsulating structure
	Unigene43293	15.43	77.92	63.19	34.34	12.99	0	12.31	8.63	3.79	8.06	258	33	9.8359	gi|18423233|ref|NP_568750.1|	68.2	2e-23	ERD1 (EARLY RESPONSIVE TO DEHYDRATION 1); ATP binding / ATPase/ nucleoside-triphosphatase/ nucleotide binding / protein binding [Arabidopsis thaliana] >gi|1169544|sp|P42762.1|ERD1_ARATH RecName: Full=ERD1 protein, chloroplastic; Flags: Precursor >gi|497629|dbj|BAA04506.1| ERD1 protein [Arabidopsis thaliana] >gi|10177198|dbj|BAB10330.1| Erd1 protein precursor [Arabidopsis thaliana]	sp|P42762|ERD1_ARATH	68.2	1e-23	ERD1 protein, chloroplastic OS=Arabidopsis thaliana GN=ERD1 PE=2 SV=1	RSc2464	54.7	7e-18	COG0542	ATPases with chaperone activity, ATP-binding subUnit	K03696	5e-27	72.4	vvi:100248728	ATP-dependent Clp protease ATP-binding subUnit ClpC	GO:0043170	GO:0017111//nucleoside-triphosphatase activity;GO:0032559//adenyl ribonucleotide binding	GO:0009526//plastid envelope;GO:0009532//plastid stroma
	Unigene43446	28.28	93.68	96.39	58.84	28.75	4.26	14.43	19.18	2.89	6.25	259	59	17.5175	gi|297825631|ref|XP_002880698.1|	51.2	3e-06	sulfate transporter [Arabidopsis lyrata subsp. lyrata] >gi|297326537|gb|EFH56957.1| sulfate transporter [Arabidopsis lyrata subsp. lyrata]	--	--	--	--	--	--	--	--	--	--	--	--	--	--	GO:0015698//inorganic anion transport	GO:0015103//inorganic anion transmembrane transporter activity	GO:0016020//membrane;GO:0043231//intracellular membrane-bounded organelle
	Unigene43579	0	9.33	3.27	2.73	1.43	0	0.72	0.66	3.57	7.62	260	6	1.7746	gi|87240477|gb|ABD32335.1|	116	9e-26	Disease resistance protein; Heat shock protein DnaJ, N-terminal; AAA ATPase [Medicago truncatula]	sp|O64789|DRL18_ARATH	67.8	2e-11	Probable disease resistance protein At1g61310 OS=Arabidopsis thaliana GN=At1g61310 PE=2 SV=1	--	--	--	--	--	K13459	2e-14	73.9	vvi:100254298	disease resistance protein RPS2	GO:0006950//response to stress;GO:0012501//programmed cell death	GO:0003676//nucleic acid binding;GO:0016462//pyrophosphatase activity;GO:0032559//adenyl ribonucleotide binding	-
	Unigene43739	26.84	213.8	195.21	108.63	46.37	38.03	42.24	83.34	2.07	5.85	261	252	74.2472	gi|217072244|gb|ACJ84482.1|	128	2e-29	unknown [Medicago truncatula]	--	--	--	--	--	--	--	--	--	K01246	3e-20	93.2	pop:POPTR_1084717	DNA-3-methyladenine glycosylase I [EC:3.2.2.20]	GO:0008152//metabolic process	GO:0016787//hydrolase activity	-
	Unigene43762	0	0	0	4.75	0.71	0	0	0	2.22	4.52	261	13	3.8302	gi|29539338|dbj|BAC67670.1|	126	6e-29	Heat shock 70 kDa protein [Cyanidioschyzon merolae]	sp|Q8K9Y8|DNAK_BUCAP	167	1e-41	Chaperone protein dnaK OS=Buchnera aphidicola subsp. Schizaphis graminum GN=dnaK PE=2 SV=1	BU153	166	1e-41	COG0443	Molecular chaperone	K04043	2e-30	127	cme:CML205C	molecular chaperone DnaK	GO:0043161//proteasomal ubiquitin-dependent protein catabolic process;GO:0000741//karyogamy;GO:0006950//response to stress	GO:0016628//oxidoreductase activity, acting on the CH-CH group of donors, NAD or NADP as acceptor;GO:0032559//adenyl ribonucleotide binding	GO:0044432//endoplasmic reticulum part;GO:0030312//external encapsulating structure;GO:0009536//plastid;GO:0016020//membrane
	Unigene43831	2.43	14.55	11.02	5.41	0	4.21	0.71	1.31	2.45	5.22	262	15	4.4026	gi|11933400|dbj|BAB19757.1|	125	1e-28	nitrate transporter NRT1-2 [Glycine max]	sp|Q9LFB8|PTR5_ARATH	60.8	2e-09	Peptide transporter PTR5 OS=Arabidopsis thaliana GN=PTR5 PE=2 SV=1	--	--	--	--	--	K03305	1e-13	71.6	pop:POPTR_752070	proton-dependent oligopeptide transporter, POT family	GO:0015833//peptide transport	-	GO:0016020//membrane
	Unigene43919	71.7	354.54	390.23	190.05	78.88	27.36	62.05	43.8	3.95	12.11	262	843	247.427	gi|15231242|ref|NP_187954.1|	137	4e-32	DIN4 (DARK INDUCIBLE 4); 3-methyl-2-oxobutanoate dehydrogenase (2-methylpropanoyl-transferring)/ catalytic [Arabidopsis thaliana] >gi|7021286|gb|AAF35281.1|AF145452_1 branched chain alpha-keto acid dehydrogenase E1 beta subUnit [Arabidopsis thaliana] >gi|9280297|dbj|BAB01752.1| branched chain alpha-keto acid dehydrogenase E1 beta subUnit [Arabidopsis thaliana] >gi|90093294|gb|ABD85160.1| At3g1345…	sp|Q55FN7|ODBB_DICDI	101	2e-21	2-oxoisovalerate dehydrogenase subUnit beta, mitochondrial OS=Dictyostelium discoideum GN=bkdB PE=3 SV=1	DR0030	76.3	1e-14	COG0022	Pyruvate/2-oxoglutarate dehydrogenase complex, dehydrogenase (E1) component, eukaryotic type, beta subUnit	K00167	1e-33	137	ath:AT3G13450	2-oxoisovalerate dehydrogenase E1 component, beta subUnit [EC:1.2.4.4]	GO:0008152//metabolic process	GO:0016624//oxidoreductase activity, acting on the aldehyde or oxo group of donors, disulfide as acceptor;GO:0004738//pyruvate dehydrogenase activity	GO:0043231//intracellular membrane-bounded organelle
	Unigene43971	15.19	98.56	71.3	87.25	23.45	5.61	3.57	7.84	3.65	9.13	262	173	50.7767	gi|115450935|ref|NP_001049068.1|	170	4e-42	Os03g0165400 [Oryza sativa Japonica Group] >gi|122247496|sp|Q10RB4.1|BGAL5_ORYSJ RecName: Full=Beta-galactosidase 5; Short=Lactase 5; Flags: Precursor >gi|113547539|dbj|BAF10982.1| Os03g0165400 [Oryza sativa Japonica Group]	sp|Q10RB4|BGAL5_ORYSJ	170	2e-42	Beta-galactosidase 5 OS=Oryza sativa subsp. japonica GN=Os03g0165400 PE=2 SV=1	--	--	--	--	--	K01190	1e-32	134	ath:AT3G52840	beta-galactosidase [EC:3.2.1.23]	GO:0044238//primary metabolic process	GO:0030246//carbohydrate binding;GO:0043167//ion binding;GO:0015925	GO:0031410//cytoplasmic vesicle
	Unigene43989	0	0	0	53.23	0	4.89	0	0	3.63	7.66	263	18	5.263	gi|110589651|gb|ABG77330.1|	140	3e-33	Hsp90 [Entosiphon sulcatum]	sp|Q7PT10|HSP83_ANOGA	151	1e-36	Heat shock protein 83 OS=Anopheles gambiae GN=Hsp83 PE=3 SV=3	SPAC926.04c	111	4e-25	COG0326	Molecular chaperone, HSP90 family	K04079	6e-33	135	pop:POPTR_592912	molecular chaperone HtpG	GO:0044267//cellular protein metabolic process;GO:0050896//response to stimulus	GO:0005515//protein binding;GO:0032559//adenyl ribonucleotide binding	GO:0044424//intracellular part
	Unigene44097	246.97	925.15	1385.16	1078.7	399.97	95.76	44.76	29.96	2.82	6.13	263	625	182.744	gi|84514165|gb|ABC59091.1|	144	2e-34	cytochrome P450 monooxygenase CYP89A28 [Medicago truncatula]	sp|Q42602|C89A2_ARATH	97.1	3e-20	Cytochrome P450 89A2 OS=Arabidopsis thaliana GN=CYP89A2 PE=2 SV=2	--	--	--	--	--	K00517	4e-12	66.2	osa:4349111	[EC:1.14.-.-]	GO:0008152//metabolic process	GO:0016712//oxidoreductase activity, acting on paired donors, with incorporation or reduction of molecular oxygen, reduced flavin or flavoprotein as one donor, and incorporation of one atom of oxygen;GO:0005506//iron ion binding	GO:0043231//intracellular membrane-bounded organelle
	Unigene44239	24.12	173.96	174.34	83.9	44.43	38.99	0.71	1.95	3.24	6	264	268	78.064	gi|108864502|gb|ABG22526.1|	126	9e-29	AMP-binding enzyme family protein, expressed [Oryza sativa (japonica cultivar-group)]	sp|O60488|ACSL4_HUMAN	69.7	5e-12	Long-chain-fatty-acid--CoA ligase 4 OS=Homo sapiens GN=ACSL4 PE=1 SV=2	ECU10g0910	50.1	1e-06	COG1022	Long-chain acyl-CoA synthetases (AMP-forming)	K01897	3e-30	126	osa:4350728	long-chain acyl-CoA synthetase [EC:6.2.1.3]	GO:0006633//fatty acid biosynthetic process;GO:0006952//defense response;GO:0010102//lateral root morphogenesis	GO:0015645//fatty-acid ligase activity	-
	Unigene44273	3.02	19.69	0	1.34	0	0	0	0	2.33	4.75	264	9	2.6216	gi|158935521|emb|CAP16138.1|	145	1e-34	Na+/H+ antiporter [Mesembryanthemum crystallinum]	sp|Q68KI4|NHX1_ARATH	134	1e-31	Sodium/hydrogen exchanger 1 OS=Arabidopsis thaliana GN=NHX1 PE=1 SV=2	SPAC15A10.06	60.1	1e-09	COG0025	NhaP-type Na+/H+ and K+/H+ antiporters	K03316	7e-10	58.9	olu:OSTLU_2316	monovalent cation:H+ antiporter, CPA1 family	GO:0055067;GO:0030001//metal ion transport	GO:0005451//monovalent cation:hydrogen antiporter activity	GO:0031224//intrinsic to membrane
	Unigene44328	55.87	374.07	489	377.14	118.03	15.26	2.82	0	3.5	7.53	265	788	228.665	gi|6226511|sp|P56725.1|ZOX_PHAVU	157	3e-38	RecName: Full=Zeatin O-xylosyltransferase; AltName: Full=Zeatin O-beta-D-xylosyltransferase >gi|5802783|gb|AAD51778.1|AF116858_1 zeatin O-xylosyltransferase [Phaseolus vulgaris]	sp|P56725|ZOX_PHAVU	157	1e-38	Zeatin O-xylosyltransferase OS=Phaseolus vulgaris GN=ZOX1 PE=2 SV=1	--	--	--	--	--	K13495	6e-35	142	rcu:RCOM_1099970	cis-zeatin O-glucosyltransferase [EC:2.4.1.215]	GO:0051234//establishment of localization	GO:0035251//UDP-glucosyltransferase activity;GO:0035252//UDP-xylosyltransferase activity	GO:0005635//nuclear envelope
	Unigene44340	4.81	31.39	33.97	14.04	9.13	2.77	7.05	2.59	2.9	7.52	265	121	35.1123	gi|15239726|ref|NP_200284.1|	89.4	1e-17	AtATG18f [Arabidopsis thaliana]	--	--	--	--	--	--	--	--	--	--	--	--	--	--	GO:0006950//response to stress	-	GO:0043231//intracellular membrane-bounded organelle
	Unigene44881	13.02	106.3	127.53	28.33	6.23	0	21.54	3.18	4.06	9.14	269	98	28.0152	gi|4530126|gb|AAD21872.1|	140	3e-33	receptor-like protein kinase homolog RK20-1 [Phaseolus vulgaris]	sp|Q8GYA4|CRK10_ARATH	131	1e-30	Cysteine-rich receptor-like protein kinase 10 OS=Arabidopsis thaliana GN=CRK10 PE=1 SV=2	--	--	--	--	--	K00924	1e-20	94.4	osa:4333912	[EC:2.7.1.-]	GO:0006464//protein modification process	GO:0004871//signal transducer activity;GO:0004713//protein tyrosine kinase activity;GO:0032559//adenyl ribonucleotide binding	-
	Unigene45142	8.22	370.26	418.01	162.82	46.03	2.71	0	0	6.89	15.55	271	94	26.6734	gi|300139921|gb|EFJ06652.1|	56.2	1e-07	rab family GTPase [Selaginella moellendorffii] >gi|300144384|gb|EFJ11068.1| rab family GTPase [Selaginella moellendorffii]	sp|P29687|RAB5_TOBAC	48.9	1e-05	Ras-related protein Rab5 OS=Nicotiana tabacum GN=RAB5 PE=2 SV=1	--	--	--	--	--	K07887	1e-07	51.2	osa:4333662	Ras-related protein Rab-5A	GO:0006810//transport	GO:0032561//guanyl ribonucleotide binding	-
	Unigene4726	0.77	15.66	32.53	6.83	1.79	0	0.23	0	10.22	23.42	830	75	6.9487	gi|187940289|gb|ACD39375.1|	175	7e-43	NAC domain protein [Glycine max]	sp|Q5Z6B6|NAC76_ORYSJ	85.1	5e-16	NAC domain-containing protein 76 OS=Oryza sativa subsp. japonica GN=NAC76 PE=2 SV=2	--	--	--	--	--	--	--	--	--	--	GO:0010087//phloem or xylem histogenesis;GO:0012501//programmed cell death;GO:0048513//organ development	-	-
	Unigene4817	1.23	10.73	13.47	4.46	1.8	0.36	0.72	0	5.3	12.26	517	52	7.7345	gi|18395497|ref|NP_565296.1|	132	2e-30	ASK14 (ARABIDOPSIS SKP1-LIKE 14); protein binding / ubiquitin-protein ligase [Arabidopsis thaliana] >gi|75318731|sp|O81057.1|ASK14_ARATH RecName: Full=SKP1-like protein 14; Short=AtSK14	sp|O81057|ASK14_ARATH	132	1e-30	SKP1-like protein 14 OS=Arabidopsis thaliana GN=ASK14 PE=1 SV=1	SPBC409.05	80.1	2e-15	COG5201	SCF ubiquitin ligase, SKP1 component	K03094	1e-31	132	ath:AT2G03170	S-phase kinase-associated protein 1	GO:0019941//modification-dependent protein catabolic process	GO:0005488//binding	-
	Unigene48352	0	0	0	7.78	0	1.24	0	0	2.09	4.22	296	14	3.6371	gi|298711838|emb|CBJ32863.1|	135	1e-31	EF2, translation elongation factor 2 [Ectocarpus siliculosus]	sp|Q1HPK6|EF2_BOMMO	160	2e-39	Translation elongation factor 2 OS=Bombyx mori GN=tef2 PE=1 SV=1	YOR133w	129	1e-30	COG0480	Translation elongation factors (GTPases)	K03234	6e-32	132	olu:OSTLU_52010	elongation factor EF-2 [EC:3.6.5.3]	GO:0010467//gene expression	GO:0008135//translation factor activity, nucleic acid binding;GO:0032561//guanyl ribonucleotide binding;GO:0017111//nucleoside-triphosphatase activity	GO:0044424//intracellular part
	Unigene48511	0.53	9.3	7.41	11.89	1.87	0	1.88	1.72	5.07	9.5	298	34	8.7737	gi|124360405|gb|ABN08418.1|	207	4e-53	Phospholipase D/Transphosphatidylase; C2 calcium/lipid-binding region, CaLB [Medicago truncatula]	sp|Q9C888|PLDE1_ARATH	133	4e-31	Phospholipase D epsilon OS=Arabidopsis thaliana GN=PLDEPSILON PE=2 SV=1	--	--	--	--	--	K01115	3e-32	133	ath:AT1G55180	phospholipase D [EC:3.1.4.4]	GO:0009267//cellular response to starvation;GO:0040007//growth;GO:0006650//glycerophospholipid metabolic process;GO:0048513//organ development;GO:0006808//regulation of nitrogen utilization	GO:0004620//phospholipase activity;GO:0046872//metal ion binding	GO:0016020//membrane
	Unigene48579	27.78	71.53	80.36	41.03	30.61	19.12	21.32	20.69	2.1	8.08	298	109	28.1274	gi|164605542|dbj|BAF98608.1|	172	1e-42	CM0545.430.nc [Lotus japonicus]	--	--	--	--	--	--	--	--	--	--	--	--	--	--	GO:0019941//modification-dependent protein catabolic process	GO:0046914//transition metal ion binding;GO:0016787//hydrolase activity	GO:0044464//cell part
	Unigene48601	17.04	98.53	111.33	48	6.85	6.15	16.25	18.9	4.55	12.05	299	182	46.808	gi|297845746|ref|XP_002890754.1|	79.3	1e-14	pyridoxal-dependent decarboxylase family protein [Arabidopsis lyrata subsp. lyrata] >gi|297336596|gb|EFH67013.1| pyridoxal-dependent decarboxylase family protein [Arabidopsis lyrata subsp. lyrata]	sp|Q9C509|SGPL_ARATH	76.3	6e-14	Sphingosine-1-phosphate lyase OS=Arabidopsis thaliana GN=At1g27980 PE=2 SV=1	--	--	--	--	--	K01634	3e-19	89.7	rcu:RCOM_1079290	sphinganine-1-phosphate aldolase [EC:4.1.2.27]	GO:0043436;GO:0006665//sphingolipid metabolic process	GO:0016830//carbon-carbon lyase activity	GO:0043231//intracellular membrane-bounded organelle
	Unigene48754	65.8	418.81	382.7	179.56	101.16	2.45	81.6	78.79	3.23	6.93	300	769	197.118	gi|13646986|dbj|BAB41080.1|	116	7e-26	DNA-binding protein DF1 [Pisum sativum]	--	--	--	--	--	--	--	--	--	--	--	--	--	--	GO:0010468//regulation of gene expression	GO:0003676//nucleic acid binding	GO:0043231//intracellular membrane-bounded organelle;GO:0031410//cytoplasmic vesicle
	Unigene48775	0	8.67	6.79	2.95	1.24	0	0	1.14	4.94	8.66	300	9	2.307	gi|24412857|emb|CAD55555.1|	213	4e-55	stachyose synthase [Pisum sativum]	sp|Q93XK2|STSYN_PEA	209	3e-54	Stachyose synthase OS=Pisum sativum GN=STS1 PE=1 SV=1	--	--	--	--	--	K06611	3e-20	93.2	ath:AT5G40390	stachyose synthetase [EC:2.4.1.67]	GO:0009311//oligosaccharide metabolic process	GO:0008378//galactosyltransferase activity	GO:0044424//intracellular part
	Unigene48935	0	0	0	12.91	1.23	1.83	0	0	2.36	4.27	302	19	4.838	gi|187609561|gb|ACD13288.1|	92.4	1e-18	cold shock domain protein 1 [Oryza sativa Japonica Group]	sp|Q04832|HEXP_LEIMA	84.3	2e-16	DNA-binding protein HEXBP OS=Leishmania major GN=HEXBP PE=4 SV=1	YNL255c	65.9	2e-11	COG5082	Arginine methyltransferase-interacting protein, contains RING Zn-finger	K09250	5e-18	85.9	ath:AT4G36020	cellular nucleic acid-binding protein	GO:0016070//RNA metabolic process	GO:0043566//structure-specific DNA binding	GO:0044424//intracellular part
	Unigene49092	0	13.15	1.12	3.51	0	1.21	0	1.7	3.5	6.56	303	15	3.8069	gi|51507375|emb|CAH18935.1|	114	3e-25	polygalacturonase [Pyrus commUnis]	sp|O22818|PGLR6_ARATH	98.6	1e-20	Probable polygalacturonase At2g43860 OS=Arabidopsis thaliana GN=At2g43860 PE=2 SV=1	--	--	--	--	--	K01184	2e-26	114	ath:AT3G59850	polygalacturonase [EC:3.2.1.15]	GO:0044238//primary metabolic process;GO:0045229//external encapsulating structure organization	GO:0004553//hydrolase activity, hydrolyzing O-glycosyl compounds	GO:0044464//cell part
	Unigene49136	72.27	192.11	205.59	83.94	41.03	6.05	14.14	33.24	2.22	4.91	304	711	179.852	gi|15228909|ref|NP_188316.1|	170	4e-42	AAE7 (ACYL-ACTIVATING ENZYME 7); AMP binding / acetate-CoA ligase [Arabidopsis thaliana] >gi|20799723|gb|AAM28624.1|AF503766_1 adenosine monophosphate binding protein 7 AMPBP7 [Arabidopsis thaliana] >gi|18086379|gb|AAL57649.1| AT3g16910/K14A17_3 [Arabidopsis thaliana] >gi|19699128|gb|AAL90930.1| AT3g16910/K14A17_3 [Arabidopsis thaliana]	--	--	--	--	DR0336	65.1	3e-11	COG0318	Acyl-CoA synthetases (AMP-forming)/AMP-acid ligases II	--	--	--	--	--	GO:0044262//cellular carbohydrate metabolic process;GO:0032787	GO:0016405//CoA-ligase activity	GO:0042579//microbody
	Unigene49137	1.05	51.31	31.29	65.87	22.66	2.42	0	0	2.18	4.52	304	77	19.4777	gi|226496027|ref|NP_001148685.1|	137	4e-32	ethylene responsive element [Zea mays] >gi|195621398|gb|ACG32529.1| ethylene responsive element [Zea mays]	sp|Q9XI33|WIN1_ARATH	134	2e-31	Ethylene-responsive transcription factor WIN1 OS=Arabidopsis thaliana GN=WIN1 PE=2 SV=1	--	--	--	--	--	K09286	2e-19	90.9	ath:AT1G50640	EREBP-like factor	GO:0000160//two-component signal transduction system (phosphorelay);GO:0006633//fatty acid biosynthetic process;GO:0010468//regulation of gene expression;GO:0006351//transcription, DNA-dependent;GO:0006950//response to stress	GO:0003677//DNA binding	GO:0043231//intracellular membrane-bounded organelle
	Unigene49289	1.57	17.05	18.38	18.01	0.61	0	1.23	1.12	11.37	27.67	305	48	12.1021	gi|297739952|emb|CBI30134.3|	82.8	1e-15	unnamed protein product [Vitis vinifera]	--	--	--	--	--	--	--	--	--	--	--	--	--	--	GO:0008152//metabolic process	GO:0016798//hydrolase activity, acting on glycosyl bonds	-
	Unigene49311	1.04	3.98	7.8	4.65	2.44	0	0.61	0.56	2.24	4.93	305	11	2.7734	gi|79379437|ref|NP_177526.2|	120	6e-27	structural constituent of ribosome [Arabidopsis thaliana] >gi|40823465|gb|AAR92284.1| At1g73850 [Arabidopsis thaliana] >gi|46518405|gb|AAS99684.1| At1g73850 [Arabidopsis thaliana]	--	--	--	--	--	--	--	--	--	--	--	--	--	--	GO:0010467//gene expression	GO:0005198//structural molecule activity	GO:0030529//ribonucleoprotein complex
	Unigene49334	2.61	16.48	12.81	8.13	3.66	0	0	0	3.41	6.38	305	19	4.7904	gi|225470513|ref|XP_002268882.1|	52	2e-06	PREDICTED: hypothetical protein [Vitis vinifera]	--	--	--	--	--	--	--	--	--	--	--	--	--	--	GO:0008152//metabolic process	GO:0003676//nucleic acid binding	-
	Unigene49372	0	0	0	2.32	0	0	0	0	#DIV/0!	#DIV/0!	306	6	1.5078	gi|298707797|emb|CBJ30228.1|	191	2e-48	Rab1B, RAB family GTPase [Ectocarpus siliculosus]	sp|Q05974|RAB1A_LYMST	193	3e-49	Ras-related protein Rab-1A OS=Lymnaea stagnalis GN=RAB1A PE=2 SV=1	ECU03g1430	133	9e-32	COG1100	GTPase SAR1 and related small G proteins	K07874	3e-48	186	osa:4325347	Ras-related protein Rab-1A	GO:0006810//transport	GO:0032561//guanyl ribonucleotide binding	GO:0043231//intracellular membrane-bounded organelle;GO:0016020//membrane
	Unigene49411	42.66	248.06	283.06	70.65	36.51	66.68	26.26	16.23	3.01	8.53	306	228	57.2972	gi|15186732|dbj|BAB62890.1|	177	4e-44	aspartic proteinase 1 [Glycine max]	sp|P40782|CYPR1_CYNCA	157	2e-38	Cyprosin (Fragment) OS=Cynara cardunculus GN=CYPRO1 PE=1 SV=2	--	--	--	--	--	K08245	2e-41	163	rcu:RCOM_0903730	phytepsin [EC:3.4.23.40]	GO:0019538//protein metabolic process	GO:0004175//endopeptidase activity	GO:0043231//intracellular membrane-bounded organelle
	Unigene49418	0	0	0	25.48	1.83	3	0	0	2.83	5.43	306	18	4.5235	gi|40287468|gb|AAR83848.1|	134	4e-31	ribosomal protein PETRP [Capsicum annuum]	sp|Q0PXV9|RL17_DIACI	194	1e-49	60S ribosomal protein L17 OS=Diaphorina citri GN=RpL17 PE=2 SV=1	SPBC2F12.04	123	7e-29	COG0091	Ribosomal protein L22	K02880	2e-33	136	pop:POPTR_230092	large subUnit ribosomal protein L17e	GO:0019538//protein metabolic process;GO:0010467//gene expression	GO:0016787//hydrolase activity;GO:0005198//structural molecule activity	GO:0033279
	Unigene49542	4.15	177.25	141.62	83.69	18.19	1.2	0	0	7.38	16.76	307	27	6.7631	gi|37780047|gb|AAP32196.1|	193	4e-49	cysteine protease 8 [Trifolium repens]	sp|O65039|CYSEP_RICCO	160	2e-39	Vignain OS=Ricinus commUnis GN=CYSEP PE=1 SV=1	--	--	--	--	--	K01376	2e-39	157	ath:AT5G50260	[EC:3.4.22.-]	GO:0019538//protein metabolic process	GO:0004175//endopeptidase activity	-
	Unigene49752	39.16	197.98	265.47	156.56	57.24	16.66	102.21	49.33	2.02	4.88	309	361	89.8398	gi|12043533|emb|CAC19789.1|	97.1	6e-20	MYB-like DNA-binding protein [Catharanthus roseus]	--	--	--	--	--	--	--	--	--	--	--	--	--	--	GO:0010468//regulation of gene expression	GO:0003676//nucleic acid binding	-
	Unigene49838	0	19.01	20.82	4.57	0	0	0	4.42	3.35	7.04	310	25	6.2015	gi|6119723|gb|AAF04193.1|AF053638_1	135	1e-31	short-chain alcohol dehydrogenase [Pisum sativum]	sp|Q9C826|ABA2_ARATH	71.2	2e-12	Xanthoxin dehydrogenase OS=Arabidopsis thaliana GN=ABA2 PE=1 SV=1	BS_fabG	58.5	3e-09	COG1028	Dehydrogenases with different specificities (related to short-chain alcohol dehydrogenases)	K09841	7e-15	75.5	rcu:RCOM_0472100	xanthoxin dehydrogenase [EC:1.1.1.288]	GO:0008152//metabolic process	GO:0005488//binding;GO:0033764;GO:0016740//transferase activity	-
	Unigene49894	3.07	69.1	83.55	50.14	21.55	3.55	1.2	5.51	3.14	7.31	311	340	84.0695	gi|158634902|gb|ABW76288.1|	62	2e-09	beta-glucosidase G3 [Medicago truncatula]	sp|P26205|BGLT_TRIRP	51.2	2e-06	Cyanogenic beta-glucosidase (Fragment) OS=Trifolium repens GN=LI PE=1 SV=1	--	--	--	--	--	K05350	4e-06	46.2	vvi:100254458	beta-glucosidase [EC:3.2.1.21]	GO:0008152//metabolic process	GO:0004553//hydrolase activity, hydrolyzing O-glycosyl compounds	-
	Unigene50024	5.61	39.44	45.72	27.83	2.98	2.95	6.59	2.2	5.72	17.54	312	113	27.8512	gi|15220455|ref|NP_176918.1|	164	4e-40	leucine-rich repeat family protein [Arabidopsis thaliana] >gi|3176660|gb|AAC18784.1| Similar to ERECTA receptor protein kinase gb|U47029 from A. thaliana [Arabidopsis thaliana] >gi|224589465|gb|ACN59266.1| leucine-rich repeat receptor-like protein kinase [Arabidopsis thaliana]	sp|Q94C77|RPKL_ARATH	80.9	2e-15	Receptor protein kinase-like protein At4g34220 OS=Arabidopsis thaliana GN=At4g34220 PE=2 SV=1	--	--	--	--	--	K00924	1e-11	64.7	ath:AT1G28440	[EC:2.7.1.-]	GO:0006464//protein modification process;GO:0007167//enzyme linked receptor protein signaling pathway	GO:0004672//protein kinase activity;GO:0032559//adenyl ribonucleotide binding	GO:0031224//intrinsic to membrane;GO:0031410//cytoplasmic vesicle
	Unigene50060	6.61	93.02	109.61	31.7	23.79	16.44	4.78	31.19	2.5	5.48	313	237	58.227	gi|4038971|gb|AAC97389.1|	193	6e-49	4-coumarate:CoA ligase isoenzyme 3 [Glycine max] >gi|4038973|gb|AAC97599.1| 4-coumarate:CoA ligase isoenzyme 3 [Glycine max]	sp|P31687|4CL2_SOYBN	192	4e-49	4-coumarate--CoA ligase 2 OS=Glycine max PE=2 SV=2	MTH657	84	6e-17	COG0318	Acyl-CoA synthetases (AMP-forming)/AMP-acid ligases II	K01904	4e-48	186	vvi:100245991	4-coumarate--CoA ligase [EC:6.2.1.12]	GO:0010208//pollen wall assembly;GO:0006952//defense response;GO:0006575//cellular amino acid derivative metabolic process;GO:0009416//response to light stimulus	GO:0016703;GO:0016405//CoA-ligase activity;GO:0032559//adenyl ribonucleotide binding	-
	Unigene50076	74.77	320.03	365.17	135.87	60.08	71.65	44.18	53.08	3.66	16.71	313	355	87.2176	gi|294653365|gb|ADF28553.1|	94	5e-19	USP transcription factor [Vitis pseudoreticulata]	sp|Q8LGG8|USPAL_ARATH	83.2	5e-16	Universal stress protein A-like protein OS=Arabidopsis thaliana GN=At3g01520 PE=1 SV=2	--	--	--	--	--	--	--	--	--	--	GO:0050896//response to stimulus	-	GO:0016020//membrane
	Unigene50077	3.56	9.97	15.19	11.32	5.95	1.76	0.6	0.55	2.04	4.22	313	36	8.8446	gi|231573|sp|P30364.1|ASPG_LUPAN	70.1	7e-12	RecName: Full=Isoaspartyl peptidase/L-asparaginase; AltName: Full=L-asparagine amidohydrolase; Contains: RecName: Full=Isoaspartyl peptidase/L-asparaginase subUnit alpha; Contains: RecName: Full=Isoaspartyl peptidase/L-asparaginase subUnit beta; Flags: Precursor >gi|19135|emb|CAA43099.1| developing seed L-asparaginase [Lupinus angustifolius]	sp|P30364|ASPG_LUPAN	70.1	4e-12	Isoaspartyl peptidase/L-asparaginase OS=Lupinus angustifolius PE=2 SV=1	--	--	--	--	--	K13051	9e-15	75.1	pop:POPTR_746733	beta-aspartyl-peptidase (threonine type) [EC:3.4.19.5]	GO:0009057//macromolecule catabolic process	GO:0016811//hydrolase activity, acting on carbon-nitrogen (but not peptide) bonds, in linear amides;GO:0008242//omega peptidase activity	-
	Unigene50136	2.54	605.17	974.52	278.54	48.18	3.52	1.19	0.55	12.86	29.37	313	747	183.525	gi|224093820|ref|XP_002310005.1|	151	2e-36	cytochrome P450 [Populus trichocarpa] >gi|222852908|gb|EEE90455.1| cytochrome P450 [Populus trichocarpa]	sp|Q50EK4|C75A1_PINTA	96.7	4e-20	Cytochrome P450 750A1 OS=Pinus taeda GN=CYP750A1 PE=2 SV=1	--	--	--	--	--	K00517	1e-18	88.2	ath:AT3G26210	[EC:1.14.-.-]	GO:0008152//metabolic process	GO:0003676//nucleic acid binding;GO:0016709//oxidoreductase activity, acting on paired donors, with incorporation or reduction of molecular oxygen, NADH or NADPH as one donor, and incorporation of one atom of oxygen;GO:0005506//iron ion binding	-
	Unigene50251	20.22	69.87	145.03	91.13	43.15	2.33	0.59	0	2.36	4.75	315	336	82.0255	gi|7672777|gb|AAF66637.1|AF143505_1	89.4	1e-17	viroid symptom modulation protein [Solanum lycopersicum]	--	--	--	--	--	--	--	--	--	K08286	2e-07	50.4	ath:AT5G47750	protein-serine/threonine kinase [EC:2.7.11.-]	GO:0006464//protein modification process;GO:0000902//cell morphogenesis	GO:0004672//protein kinase activity;GO:0032559//adenyl ribonucleotide binding	-
	Unigene50256	2.05	394.52	173.66	323.06	11.37	0.59	0	0	26.12	60.5	311	821	203.003	gi|157416233|gb|ABV54754.1|	172	8e-43	beta-glucosidase-like protein [Trifolium repens]	sp|P26205|BGLT_TRIRP	166	3e-41	Cyanogenic beta-glucosidase (Fragment) OS=Trifolium repens GN=LI PE=1 SV=1	AGl770	57.4	6e-09	COG2723	Beta-glucosidase/6-phospho-beta-glucosidase/beta-galactosidase	K05350	4e-32	132	vvi:100254458	beta-glucosidase [EC:3.2.1.21]	GO:0044238//primary metabolic process	GO:0043167//ion binding;GO:0008422//beta-glucosidase activity	-
	Unigene50327	4.55	28.06	24.8	14.63	7.68	4.67	0	9.24	2.43	4.87	315	71	17.3328	gi|15242078|ref|NP_197587.1|	154	4e-37	glycosyl hydrolase family 17 protein [Arabidopsis thaliana]	sp|Q9M088|E135_ARATH	138	1e-32	Glucan endo-1,3-beta-glucosidase 5 OS=Arabidopsis thaliana GN=At4g31140 PE=1 SV=1	--	--	--	--	--	K01199	4e-09	56.2	ath:AT3G57260	glucan endo-1,3-beta-D-glucosidase [EC:3.2.1.39]	GO:0044238//primary metabolic process	GO:0043167//ion binding;GO:0008422//beta-glucosidase activity	GO:0005618//cell wall;GO:0031225//anchored to membrane;GO:0043231//intracellular membrane-bounded organelle;GO:0031410//cytoplasmic vesicle
	Unigene50335	2.02	89.13	87.88	31.5	8.87	0	3.56	1.09	7.84	19.11	315	78	19.0416	gi|2738982|gb|AAB94584.1|	134	4e-31	CYP71A10 [Glycine max]	sp|O81970|C71A9_SOYBN	108	1e-23	Cytochrome P450 71A9 OS=Glycine max GN=CYP71A9 PE=2 SV=1	--	--	--	--	--	K00517	4e-24	106	ath:AT5G25180	[EC:1.14.-.-]	GO:0008152//metabolic process	GO:0016491//oxidoreductase activity;GO:0005506//iron ion binding	GO:0043231//intracellular membrane-bounded organelle;GO:0044425//membrane part
	Unigene50412	0	0	0	35.89	2.95	4.07	0	0	2.94	5.38	316	35	8.5173	gi|195623470|gb|ACG33565.1|	116	7e-26	40S ribosomal protein S24 [Zea mays]	sp|Q962Q6|RS24_SPOFR	154	2e-37	40S ribosomal protein S24 OS=Spodoptera frugiperda GN=RpS24 PE=2 SV=1	YIL069c	95.9	2e-20	COG2004	Ribosomal protein S24E	K02974	5e-28	119	sbi:SORBI_04g008130	small subUnit ribosomal protein S24e	GO:0010467//gene expression	GO:0005198//structural molecule activity;GO:0005488//binding	GO:0030529//ribonucleoprotein complex
	Unigene50424	69.52	422.28	391.8	164.86	98.39	31.41	35.48	50.41	3.32	9.78	316	478	116.322	gi|224078846|ref|XP_002305651.1|	189	6e-48	f-box family protein [Populus trichocarpa] >gi|222848615|gb|EEE86162.1| f-box family protein [Populus trichocarpa]	sp|Q7XVM8|TIR1B_ORYSJ	140	2e-33	Transport inhibitor response 1-like protein Os04g0395600 OS=Oryza sativa subsp. japonica GN=Os04g0395600 PE=2 SV=1	--	--	--	--	--	K13463	4e-13	69.7	ppp:PHYPADRAFT_171144	coronatine-insensitive protein 1	GO:0009755//hormone-mediated signaling pathway	GO:0004871//signal transducer activity;GO:0043178//alcohol binding	-
	Unigene50525	3.52	347.69	386.28	105.09	2.35	27.26	0	0	10.26	23.47	317	534	129.54	gi|224138528|ref|XP_002326625.1|	183	5e-46	autoinhibited H+ ATPase [Populus trichocarpa] >gi|222833947|gb|EEE72424.1| autoinhibited H+ ATPase [Populus trichocarpa]	sp|Q43128|PMA10_ARATH	172	7e-43	ATPase 10, plasma membrane-type OS=Arabidopsis thaliana GN=AHA10 PE=2 SV=2	MJ1226	61.6	3e-10	COG0474	Cation transport ATPase	K01535	5e-44	172	ath:AT1G17260	H+-transporting ATPase [EC:3.6.3.6]	GO:0009206;GO:0006811//ion transport	GO:0015662//ATPase activity, coupled to transmembrane movement of ions, phosphorylative mechanism;GO:0032559//adenyl ribonucleotide binding	GO:0031224//intrinsic to membrane
	Unigene50538	28.04	148.78	91.33	44.58	6.44	43.93	23.51	32.32	2.16	4.97	318	246	59.4878	gi|22326581|ref|NP_195946.2|	169	9e-42	LAC11 (laccase 11); laccase [Arabidopsis thaliana] >gi|75331174|sp|Q8VZA1.1|LAC11_ARATH RecName: Full=Laccase-11; AltName: Full=Benzenediol:oxygen oxidoreductase 11; AltName: Full=Urishiol oxidase 11; AltName: Full=Diphenol oxidase 11; Flags: Precursor >gi|17473695|gb|AAL38304.1| laccase (diphenol oxidase)-like protein [Arabidopsis thaliana] >gi|20148527|gb|AAM10154.1| laccase (diphenol oxidase)-…	sp|Q8VZA1|LAC11_ARATH	169	5e-42	Laccase-11 OS=Arabidopsis thaliana GN=LAC11 PE=2 SV=1	YFL041w	58.9	2e-09	COG2132	Putative multicopper oxidases	K00368	8e-24	105	osa:4324803	nitrite reductase (NO-forming) [EC:1.7.2.1]	GO:0009808//lignin metabolic process	GO:0046914//transition metal ion binding;GO:0016682//oxidoreductase activity, acting on diphenols and related substances as donors, oxygen as acceptor	GO:0005576//extracellular region;GO:0031410//cytoplasmic vesicle
	Unigene50554	66.08	220.17	248.34	303.14	84.89	30.64	29.38	15.62	3.03	7.32	318	416	100.597	gi|30687142|ref|NP_850851.1|	80.9	4e-15	heavy-metal-associated domain-containing protein [Arabidopsis thaliana] >gi|238481311|ref|NP_001154719.1| heavy-metal-associated domain-containing protein [Arabidopsis thaliana]	--	--	--	--	--	--	--	--	--	--	--	--	--	--	GO:0006812//cation transport	GO:0005198//structural molecule activity;GO:0043169//cation binding	GO:0030312//external encapsulating structure
	Unigene50559	0	1.63	1.6	5.02	0	0	0	0	#DIV/0!	#DIV/0!	318	7	1.6927	gi|15242391|ref|NP_197082.1|	72	2e-12	pollen Ole e 1 allergen and extensin family protein [Arabidopsis thaliana] >gi|9755623|emb|CAC01777.1| proline-rich protein [Arabidopsis thaliana] >gi|27311645|gb|AAO00788.1| proline-rich protein [Arabidopsis thaliana] >gi|53828649|gb|AAU94434.1| At5g15780 [Arabidopsis thaliana]	sp|O43670|ZN207_HUMAN	67.8	2e-11	Zinc finger protein 207 OS=Homo sapiens GN=ZNF207 PE=1 SV=1	mlr4379	54.3	5e-08	COG0541	Signal recognition particle GTPase	K03260	3e-08	53.5	ppp:PHYPADRAFT_20993	translation initiation factor eIF-4F	GO:0006810//transport	-	GO:0031410//cytoplasmic vesicle
	Unigene50586	35.04	164.04	200.81	161.04	66.74	2.89	21.74	7	2.63	5.77	318	289	69.8861	gi|226290822|gb|ACO40486.1|	163	5e-40	NAC family transcription factor 3 [Cicer arietinum]	sp|O49255|NAC29_ARATH	65.9	7e-11	NAC domain-containing protein 29 OS=Arabidopsis thaliana GN=NAC029 PE=2 SV=1	--	--	--	--	--	--	--	--	--	--	GO:0016049//cell growth;GO:0010468//regulation of gene expression;GO:0009791//post-embryonic development;GO:0010260//organ senescence	GO:0003676//nucleic acid binding	GO:0043231//intracellular membrane-bounded organelle
	Unigene50676	1	13.58	3.19	33.88	0	1.15	0	0	14.65	27.82	319	15	3.6159	gi|124359969|gb|ABN07985.1|	126	7e-29	Sterol desaturase [Medicago truncatula]	--	--	--	--	--	--	--	--	--	--	--	--	--	--	GO:0006633//fatty acid biosynthetic process;GO:0003006//reproductive developmental process	GO:0046914//transition metal ion binding;GO:0003824//catalytic activity	GO:0031224//intrinsic to membrane;GO:0043231//intracellular membrane-bounded organelle;GO:0043667
	Unigene50735	17.91	229.62	260.59	153.94	35.49	1.15	14.6	19.8	6.05	16.02	320	562	135.054	gi|84514173|gb|ABC59095.1|	189	6e-48	cytochrome P450 monooxygenase CYP704G7 [Medicago truncatula]	sp|Q50EK3|C04C1_PINTA	90.1	4e-18	Cytochrome P450 704C1 OS=Pinus taeda GN=CYP704C1 PE=2 SV=1	--	--	--	--	--	K00517	6e-11	62.4	ath:AT1G01600	[EC:1.14.-.-]	GO:0008152//metabolic process	GO:0005506//iron ion binding;GO:0016712//oxidoreductase activity, acting on paired donors, with incorporation or reduction of molecular oxygen, reduced flavin or flavoprotein as one donor, and incorporation of one atom of oxygen	GO:0031410//cytoplasmic vesicle
	Unigene50759	1.49	154.89	268.02	88.05	44.22	0.57	0.58	0.54	3.85	8.28	320	598	143.705	gi|223453050|gb|ACM89789.1|	94.7	3e-19	cytochrome P450 monooxygenase CYP736B [Vitis arizonica x Vitis rupestris] >gi|225421127|gb|ACN89832.1| cytochrome P450 monooxygenase CYP736B [Vitis arizonica x Vitis rupestris]	sp|Q42600|C84A1_ARATH	73.9	3e-13	Cytochrome P450 84A1 OS=Arabidopsis thaliana GN=CYP84A1 PE=2 SV=1	--	--	--	--	--	K09755	2e-14	73.9	ath:AT4G36220	ferulate-5-hydroxylase [EC:1.14.-.-]	GO:0008152//metabolic process	GO:0016709//oxidoreductase activity, acting on paired donors, with incorporation or reduction of molecular oxygen, NADH or NADPH as one donor, and incorporation of one atom of oxygen;GO:0005506//iron ion binding	-
	Unigene51393	2.92	33.92	0	2.17	0.57	0	0	0	4.12	8.94	327	89	20.9297	gi|255317077|gb|ACU01856.1|	146	6e-35	Na+/H+ exchanger 5 [Populus euphratica]	sp|Q68KI4|NHX1_ARATH	119	6e-27	Sodium/hydrogen exchanger 1 OS=Arabidopsis thaliana GN=NHX1 PE=1 SV=2	SPAC15A10.06	48.1	4e-06	COG0025	NhaP-type Na+/H+ and K+/H+ antiporters	--	--	--	--	--	GO:0055067;GO:0030001//metal ion transport	GO:0005451//monovalent cation:hydrogen antiporter activity	GO:0031224//intrinsic to membrane
	Unigene51481	6.8	431.67	433.39	105.35	0	1.68	0	0	47.6	109.36	328	701	164.348	gi|407049|emb|CAA53099.1|	180	4e-45	beta-fructofuranosidase [Daucus carota]	sp|P80065|INVB_DAUCA	177	2e-44	Beta-fructofuranosidase, soluble isoenzyme I OS=Daucus carota GN=INV*DC4 PE=1 SV=2	BS_sacC	53.1	1e-07	COG1621	Beta-fructosidases (levanase/invertase)	K01193	2e-40	160	vvi:100241232	beta-fructofuranosidase [EC:3.2.1.26]	GO:0044238//primary metabolic process	GO:0004553//hydrolase activity, hydrolyzing O-glycosyl compounds	GO:0043231//intracellular membrane-bounded organelle
	Unigene51562	34.36	138.01	124.41	76.48	49.8	24.03	14.77	18.22	2.27	5.98	329	330	77.1326	gi|18379026|ref|NP_563669.1|	139	7e-33	TPK1 (THIAMIN PYROPHOSPHOKINASE1); thiamin diphosphokinase [Arabidopsis thaliana] >gi|6056414|gb|AAF02878.1|AC009525_12 Unknown protein [Arabidopsis thaliana]	sp|Q9H3S4|TPK1_HUMAN	64.7	2e-10	Thiamin pyrophosphokinase 1 OS=Homo sapiens GN=TPK1 PE=2 SV=1	YOR143c	47.8	5e-06	COG1564	Thiamine pyrophosphokinase	K00949	3e-32	133	osa:4338566	thiamine pyrophosphokinase [EC:2.7.6.2]	GO:0042723//thiamin and derivative metabolic process;GO:0009108//coenzyme biosynthetic process	GO:0016778;GO:0032559//adenyl ribonucleotide binding	GO:0043231//intracellular membrane-bounded organelle;GO:0044444//cytoplasmic part
	Unigene51574	5.32	35.82	32.01	11.85	6.79	0	3.41	0.52	3.91	7.91	329	34	7.947	gi|115451775|ref|NP_001049488.1|	86.3	1e-16	Os03g0235700 [Oryza sativa Japonica Group] >gi|113547959|dbj|BAF11402.1| Os03g0235700 [Oryza sativa Japonica Group]	sp|P46032|PTR2_ARATH	80.9	2e-15	Peptide transporter PTR2 OS=Arabidopsis thaliana GN=PTR2 PE=1 SV=1	--	--	--	--	--	K03305	1e-17	84.7	sbi:SORBI_01g009890	proton-dependent oligopeptide transporter, POT family	GO:0006857//oligopeptide transport	GO:0015198//oligopeptide transporter activity;GO:0015103//inorganic anion transmembrane transporter activity	GO:0005773//vacuole;GO:0031090//organelle membrane;GO:0031224//intrinsic to membrane
	Unigene51617	37.15	221.09	188.36	155.19	72.22	25.07	80.98	6.23	2.32	4.55	330	744	173.372	gi|15228530|ref|NP_189534.1|	121	3e-27	AtHB34 (ARABIDOPSIS THALIANA HOMEOBOX PROTEIN 34); DNA binding / transcription factor [Arabidopsis thaliana]	sp|Q9SB61|Y4466_ARATH	60.5	3e-09	ZF-HD homeobox protein At4g24660 OS=Arabidopsis thaliana GN=At4g24660 PE=1 SV=1	--	--	--	--	--	--	--	--	--	--	GO:0010468//regulation of gene expression;GO:0009725//response to hormone stimulus;GO:0006350//transcription	GO:0003676//nucleic acid binding	-
	Unigene51845	16.3	164.95	150.91	44.3	11.78	1.66	3.94	2.58	7.36	17.49	332	387	89.6382	gi|297797713|ref|XP_002866741.1|	221	2e-57	succinate dehydrogenase 1-1 [Arabidopsis lyrata subsp. lyrata] >gi|297312576|gb|EFH43000.1| succinate dehydrogenase 1-1 [Arabidopsis lyrata subsp. lyrata]	sp|O82663|DHSA1_ARATH	221	8e-58	Succinate dehydrogenase [ubiquinone] flavoprotein subUnit 1, mitochondrial OS=Arabidopsis thaliana GN=SDH1-1 PE=1 SV=1	SPAC1556.02c	202	1e-52	COG1053	Succinate dehydrogenase/fumarate reductase, flavoprotein subUnit	K00234	2e-59	223	ppp:PHYPADRAFT_196863	succinate dehydrogenase (ubiquinone) flavoprotein subUnit [EC:1.3.5.1]	GO:0022904//respiratory electron transport chain;GO:0009060//aerobic respiration	GO:0046914//transition metal ion binding;GO:0000104//succinate dehydrogenase activity;GO:0032559//adenyl ribonucleotide binding	GO:0030312//external encapsulating structure;GO:0005746//mitochondrial respiratory chain
	Unigene52396	71.85	174.83	165.83	128.59	51.08	26.03	76.62	32.84	2.04	4.63	339	600	136.104	gi|89329716|gb|ABD67495.1|	197	3e-50	RAMOSUS4 [Pisum sativum]	sp|Q9SIM9|ORE9_ARATH	53.1	5e-07	F-box protein ORE9 OS=Arabidopsis thaliana GN=ORE9 PE=1 SV=2	--	--	--	--	--	--	--	--	--	--	GO:0009628//response to abiotic stimulus;GO:0048513//organ development;GO:0065007//biological regulation;GO:0009653//anatomical structure morphogenesis	-	GO:0043234//protein complex;GO:0044424//intracellular part
	Unigene52441	59.17	149.79	130.76	140.61	54.92	26.57	25.91	4.55	2.37	4.68	339	267	60.5664	gi|225544292|gb|ACN91542.1|	85.1	2e-16	anthocyanin permease 1 [Vitis vinifera]	sp|Q9LYT3|TT12_ARATH	67.8	2e-11	Protein TRANSPARENT TESTA 12 OS=Arabidopsis thaliana GN=TT12 PE=2 SV=1	--	--	--	--	--	--	--	--	--	--	GO:0006810//transport	GO:0022857//transmembrane transporter activity	GO:0016020//membrane
	Unigene52458	18.78	50.1	37.57	32.93	14.83	10.3	14.33	7.58	2.14	6.24	339	116	26.3135	gi|75303404|sp|Q8S3J3.1|HIUH_SOYBN	53.5	7e-07	RecName: Full=Hydroxyisourate hydrolase; Short=HIU hydrolase; Short=HIUHase; Flags: Precursor >gi|19569603|gb|AAL92115.1|AF486839_1 hydroxyisourate hydrolase [Glycine max]	sp|Q8S3J3|HIUH_SOYBN	53.5	4e-07	Hydroxyisourate hydrolase OS=Glycine max GN=HIUH PE=1 SV=1	--	--	--	--	--	--	--	--	--	--	GO:0009112	GO:0016812//hydrolase activity, acting on carbon-nitrogen (but not peptide) bonds, in cyclic amides;GO:0016798//hydrolase activity, acting on glycosyl bonds;GO:0043167//ion binding	GO:0044439//peroxisomal part;GO:0031224//intrinsic to membrane
	Unigene52523	3.75	23.45	19.98	18.24	3.29	1.08	6.05	7.56	2.72	6.44	340	48	10.8563	gi|144905175|dbj|BAF56239.1|	197	3e-50	cytochrome P450 enzyme [Pisum sativum]	sp|O64989|C90B1_ARATH	151	1e-36	Cytochrome P450 90B1 OS=Arabidopsis thaliana GN=CYP90B1 PE=1 SV=1	slr0574	49.7	1e-06	COG2124	Cytochrome P450	K09587	9e-38	151	ath:AT3G50660	cytochrome P450, family 90, subfamily B, polypeptide 1 (steroid 22-alpha-hydroxylase) [EC:1.14.13.-]	GO:0009725//response to hormone stimulus;GO:0016129;GO:0000902//cell morphogenesis;GO:0009965//leaf morphogenesis	GO:0016709//oxidoreductase activity, acting on paired donors, with incorporation or reduction of molecular oxygen, NADH or NADPH as one donor, and incorporation of one atom of oxygen;GO:0005506//iron ion binding;GO:0008395//steroid hydroxylase activity	GO:0043231//intracellular membrane-bounded organelle;GO:0031410//cytoplasmic vesicle
	Unigene52564	37.35	84.36	90.65	69.63	15.29	11.86	31.79	7.03	2.18	4.62	341	279	62.9173	gi|37196706|dbj|BAC97801.1|	148	2e-35	RelA-SpoT like protein PsRSH1 [Pisum sativum]	--	--	--	--	--	--	--	--	--	--	--	--	--	--	GO:0009725//response to hormone stimulus;GO:0008617//guanosine metabolic process;GO:0006950//response to stress	GO:0016778;GO:0016787//hydrolase activity;GO:0015291//secondary active transmembrane transporter activity	GO:0016020//membrane;GO:0009536//plastid
	Unigene52746	23.21	252.63	294.61	134.32	24.43	2.14	70.83	1.5	3.21	7.2	343	310	69.5005	gi|68131809|gb|AAY85183.1|	99	1e-20	tyrosine aminotransferase [Medicago truncatula]	--	--	--	--	--	--	--	--	--	K00815	1e-13	71.6	pop:POPTR_568851	tyrosine aminotransferase [EC:2.6.1.5]	GO:0042360//vitamin E metabolic process	GO:0016846//carbon-sulfur lyase activity;GO:0070547;GO:0048037//cofactor binding	-
	Unigene52887	25.84	67.81	79.75	54.96	31.84	10.12	27.62	12.91	2.12	4.79	345	357	79.5736	gi|30689144|ref|NP_194903.2|	133	7e-31	WIN2 (HOPW1-1-INTERACTING 2); protein serine/threonine phosphatase [Arabidopsis thaliana] >gi|75303285|sp|Q8RXV3.1|P2C59_ARATH RecName: Full=Probable protein phosphatase 2C 59; Short=AtPP2C59; AltName: Full=Protein phosphatase 2C WIN2; Short=PP2C WIN2; AltName: Full=HopW1-1-interacting protein 2	sp|Q8RXV3|P2C59_ARATH	133	4e-31	Probable protein phosphatase 2C 59 OS=Arabidopsis thaliana GN=WIN2 PE=1 SV=1	--	--	--	--	--	--	--	--	--	--	GO:0006952//defense response;GO:0006464//protein modification process	GO:0043169//cation binding;GO:0004721//phosphoprotein phosphatase activity	GO:0043234//protein complex;GO:0043231//intracellular membrane-bounded organelle;GO:0016020//membrane
	Unigene52940	0	0	0	39.04	3.78	5.86	0	0	2.22	4.04	345	28	6.2411	gi|116056464|emb|CAL52753.1|	121	2e-27	ribosomal protein S20 (ISS) [Ostreococcus tauri]	sp|P23403|RS20_XENLA	139	7e-33	40S ribosomal protein S20 OS=Xenopus laevis GN=rps20 PE=3 SV=1	SPCC576.09	115	2e-26	COG0051	Ribosomal protein S10	K02969	1e-28	121	olu:OSTLU_30430	small subUnit ribosomal protein S20e	GO:0010467//gene expression;GO:0006464//protein modification process	GO:0003676//nucleic acid binding;GO:0004672//protein kinase activity;GO:0005198//structural molecule activity;GO:0032559//adenyl ribonucleotide binding	GO:0030312//external encapsulating structure;GO:0015935//small ribosomal subUnit;GO:0031981//nuclear lumen
	Unigene52941	0	0	0	34.31	1.08	3.72	0	0	3.08	6.5	346	31	6.8898	gi|255089517|ref|XP_002506680.1|	138	2e-32	ribosomal protein L37ae [Micromonas sp. RCC299] >gi|226457652|gb|EEH54951.1| ribosomal protein L37ae [Micromonas pusilla CCMP1545] >gi|226521953|gb|ACO67938.1| ribosomal protein L37ae [Micromonas sp. RCC299]	sp|Q9VMU4|RL37A_DROME	169	6e-42	60S ribosomal protein L37a OS=Drosophila melanogaster GN=RpL37A PE=1 SV=3	YPR043w	137	6e-33	COG1997	Ribosomal protein L37AE/L43A	K02921	6e-35	142	cme:CMN315C	large subUnit ribosomal protein L37Ae	GO:0010467//gene expression;GO:0022613	GO:0043169//cation binding;GO:0005198//structural molecule activity	GO:0015934//large ribosomal subUnit
	Unigene52955	5.06	13.02	13.25	9.73	0.54	0	0	0	2.37	4.91	346	22	4.8895	gi|4099833|gb|AAD00694.1|	172	1e-42	bifunctional nuclease [Zinnia violacea]	sp|P24504|NUP3_PENSQ	72.8	6e-13	Nuclease PA3 OS=Penicillium sp. PE=1 SV=1	--	--	--	--	--	--	--	--	--	--	GO:0006259//DNA metabolic process	GO:0005488//binding;GO:0004518//nuclease activity	GO:0031410//cytoplasmic vesicle
	Unigene52997	26.23	111.69	152.66	67.6	27.44	11.69	43.75	43.56	2.53	5.94	346	430	95.568	gi|18408922|ref|NP_564918.1|	187	4e-47	ATTPS6; alpha,alpha-trehalose-phosphate synthase (UDP-forming)/ transferase, transferring glycosyl groups / trehalose-phosphatase [Arabidopsis thaliana]	sp|Q94AH8|TPS6_ARATH	187	2e-47	Alpha,alpha-trehalose-phosphate synthase [UDP-forming] 6 OS=Arabidopsis thaliana GN=TPS6 PE=1 SV=2	YBR126c	91.7	3e-19	COG0380	Trehalose-6-phosphate synthase	K00697	9e-36	144	ath:AT1G06410	alpha,alpha-trehalose-phosphate synthase (UDP-forming) [EC:2.4.1.15]	GO:0005991//trehalose metabolic process	GO:0035251//UDP-glucosyltransferase activity;GO:0019203//carbohydrate phosphatase activity	GO:0043231//intracellular membrane-bounded organelle
	Unigene53066	0.92	11.49	14.19	5.62	1.61	0	1.62	0.49	6.46	13.48	347	14	3.1025	gi|38194929|gb|AAR13317.1|	66.2	1e-10	gag-pol polyprotein [Phaseolus vulgaris]	--	--	--	--	--	--	--	--	--	--	--	--	--	--	GO:0006260//DNA replication	GO:0003676//nucleic acid binding;GO:0016891//endoribonuclease activity, producing 5'-phosphomonoesters;GO:0034061	GO:0043231//intracellular membrane-bounded organelle
	Unigene53075	1.38	23.47	30.35	4.6	1.07	3.18	8.62	7.4	2.26	4.35	347	40	8.8644	gi|224120564|ref|XP_002318361.1|	159	7e-39	multidrug resistance protein ABC transporter family [Populus trichocarpa] >gi|222859034|gb|EEE96581.1| multidrug resistance protein ABC transporter family [Populus trichocarpa]	sp|Q9LYS2|AB10C_ARATH	137	2e-32	ABC transporter C family member 10 OS=Arabidopsis thaliana GN=ABCC10 PE=2 SV=1	YDR135c	83.2	1e-16	COG1132	ABC-type multidrug transport system, ATPase and permease components	K05666	2e-14	73.9	olu:OSTLU_35503	ATP-binding cassette, subfamily C (CFTR/MRP), member 2	GO:0006810//transport;GO:0008152//metabolic process	GO:0015405//P-P-bond-hydrolysis-driven transmembrane transporter activity;GO:0016628//oxidoreductase activity, acting on the CH-CH group of donors, NAD or NADP as acceptor;GO:0017111//nucleoside-triphosphatase activity;GO:0032559//adenyl ribonucleotide binding	GO:0031224//intrinsic to membrane
	Unigene53143	4.57	23.9	14.64	9.67	7.49	2.64	0	4.43	2.15	4.44	348	49	10.8277	gi|205277580|gb|ACI02057.1|	144	2e-34	fabatin precursor [Vicia faba]	sp|P81456|DEF1_VICFA	105	1e-22	Defensin-like protein 1 OS=Vicia faba PE=1 SV=1	--	--	--	--	--	--	--	--	--	--	GO:0006950//response to stress	-	-
	Unigene53179	55.2	287.51	263.76	142.67	91.22	50.04	17.67	2.45	2.54	5.42	349	521	114.797	gi|2739046|gb|AAB94599.1|	100	5e-21	polyphosphoinositide binding protein Ssh2p [Glycine max]	--	--	--	--	--	--	--	--	--	--	--	--	--	--	GO:0051234//establishment of localization	-	GO:0044464//cell part
	Unigene532	9.93	23.13	23.55	18.89	9.36	4.3	6.15	5.79	2.2	6.08	1154	191	12.7276	gi|297799384|ref|XP_002867576.1|	408	1e-113	mitochondrial substrate carrier family protein [Arabidopsis lyrata subsp. lyrata] >gi|297313412|gb|EFH43835.1| mitochondrial substrate carrier family protein [Arabidopsis lyrata subsp. lyrata]	sp|Q54DU1|MCFP_DICDI	189	3e-47	Mitochondrial substrate carrier family protein P OS=Dictyostelium discoideum GN=mcfP PE=3 SV=1	--	--	--	--	--	K05863	4e-32	135	ath:AT5G56450	solute carrier family 25 (mitochondrial carrier; adenine nucleotide translocator)	GO:0051234//establishment of localization	-	GO:0019866//organelle inner membrane;GO:0043231//intracellular membrane-bounded organelle
	Unigene53300	15.01	170.83	131.99	91.13	24.47	1.05	21.89	62.15	2.11	4.68	350	559	122.819	gi|986969|gb|AAA75414.1|	162	1e-39	TGACG-motif-binding protein [Glycine max] >gi|113367176|gb|ABI34645.1| bZIP transcription factor bZIP52 [Glycine max]	sp|Q39237|TGA1_ARATH	105	9e-23	Transcription factor TGA1 OS=Arabidopsis thaliana GN=TGA1 PE=1 SV=2	--	--	--	--	--	K09060	9e-23	101	ath:AT5G10030	plant G-box-binding factor	GO:0006351//transcription, DNA-dependent;GO:0006952//defense response	GO:0003677//DNA binding;GO:0005515//protein binding	GO:0043231//intracellular membrane-bounded organelle
	Unigene53308	3.18	14.85	20.87	6.08	1.06	5.25	0.53	1.47	2.65	6.04	350	59	12.963	gi|3549681|emb|CAA20592.1|	160	3e-39	male sterility 2-like protein [Arabidopsis thaliana]	sp|Q93ZB9|FACR3_ARATH	160	2e-39	Fatty acyl-CoA reductase 3 OS=Arabidopsis thaliana GN=FAR3 PE=2 SV=1	--	--	--	--	--	K13356	1e-41	164	vvi:100254606	fatty acyl-CoA reductase [EC:1.2.1.-]	GO:0009555//pollen development;GO:0006633//fatty acid biosynthetic process;GO:0006970//response to osmotic stress	GO:0016620//oxidoreductase activity, acting on the aldehyde or oxo group of donors, NAD or NADP as acceptor	GO:0043231//intracellular membrane-bounded organelle
	Unigene53352	1.81	8.89	10.16	14.14	3.18	1.57	0.53	4.39	2.52	5.83	351	36	7.8871	gi|224134621|ref|XP_002327449.1|	171	2e-42	aminophospholipid ATPase [Populus trichocarpa] >gi|222836003|gb|EEE74424.1| aminophospholipid ATPase [Populus trichocarpa]	sp|Q9SLK6|ALA6_ARATH	144	2e-34	Phospholipid-transporting ATPase 6 OS=Arabidopsis thaliana GN=ALA6 PE=1 SV=2	ECU06g0930	69.3	2e-12	COG0474	Cation transport ATPase	K01530	1e-45	177	rcu:RCOM_0654980	phospholipid-translocating ATPase [EC:3.6.3.1]	GO:0009206;GO:0006869//lipid transport	GO:0042625//ATPase activity, coupled to transmembrane movement of ions;GO:0046872//metal ion binding;GO:0005548//phospholipid transporter activity;GO:0032559//adenyl ribonucleotide binding	GO:0031224//intrinsic to membrane;GO:0043231//intracellular membrane-bounded organelle
	Unigene53353	1.36	6.91	6.29	5.05	2.12	0	0	0	2.87	5.44	351	16	3.5054	gi|212960446|gb|ACJ38667.1|	193	4e-49	cellulose synthase [Betula luminifera]	sp|Q9SJ22|CESA9_ARATH	185	9e-47	Probable cellulose synthase A catalytic subUnit 9 [UDP-forming] OS=Arabidopsis thaliana GN=CESA9 PE=2 SV=1	--	--	--	--	--	K10999	2e-48	186	zma:541804	cellulose synthase A [EC:2.4.1.12]	GO:0045229//external encapsulating structure organization;GO:0009250//glucan biosynthetic process;GO:0003006//reproductive developmental process;GO:0042546//cell wall biogenesis	GO:0016759//cellulose synthase activity;GO:0046914//transition metal ion binding	GO:0031224//intrinsic to membrane
	Unigene53393	57.6	389.56	465.47	422.56	125.71	122.55	14.91	1.95	3.39	6.21	351	560	122.688	gi|297790444|ref|XP_002863113.1|	126	4e-30	proton-dependent oligopeptide transport family protein [Arabidopsis lyrata subsp. lyrata] >gi|297308935|gb|EFH39372.1| proton-dependent oligopeptide transport family protein [Arabidopsis lyrata subsp. lyrata]	sp|Q9M390|PTR1_ARATH	87.4	2e-17	Peptide transporter PTR1 OS=Arabidopsis thaliana GN=PTR1 PE=2 SV=1	--	--	--	--	--	K03305	4e-21	96.3	pop:POPTR_752070	proton-dependent oligopeptide transporter, POT family	GO:0048856//anatomical structure development;GO:0015833//peptide transport;GO:0015706//nitrate transport;GO:0003006//reproductive developmental process;GO:0009791//post-embryonic development;GO:0031669//cellular response to nutrient levels	GO:0015112//nitrate transmembrane transporter activity	GO:0016020//membrane
	Unigene53403	0	72.37	41.98	14.6	0	0	0	0.97	44.17	98.31	352	165	36.0464	gi|224177807|gb|ACN38875.1|	209	1e-53	chloroplast 1-deoxy-D-xylulose 5-phosphate synthase [Linum usitatissimum]	sp|O78328|DXS_CAPAN	202	4e-52	Probable 1-deoxy-D-xylulose-5-phosphate synthase, chloroplastic OS=Capsicum annuum GN=TKT2 PE=2 SV=1	mlr7474	156	7e-39	COG1154	Deoxyxylulose-5-phosphate synthase	K01662	2e-54	206	rcu:RCOM_0679170	1-deoxy-D-xylulose-5-phosphate synthase [EC:2.2.1.7]	GO:0006772//thiamin metabolic process;GO:0006721//terpenoid metabolic process	GO:0016903//oxidoreductase activity, acting on the aldehyde or oxo group of donors;GO:0016744	-
	Unigene53405	61.06	189.55	176.11	83.57	5.82	1.57	37.16	6.81	2.45	4.93	352	185	40.4156	gi|124359760|gb|ABD32405.2|	216	8e-56	Cellulose synthase [Medicago truncatula]	sp|O80891|CSLB4_ARATH	157	2e-38	Cellulose synthase-like protein B4 OS=Arabidopsis thaliana GN=CSLB4 PE=2 SV=1	--	--	--	--	--	K10999	8e-27	115	pop:POPTR_819877	cellulose synthase A [EC:2.4.1.12]	GO:0045229//external encapsulating structure organization;GO:0009250//glucan biosynthetic process	GO:0016759//cellulose synthase activity	GO:0031224//intrinsic to membrane
	Unigene53517	43.3	166.43	154.44	67.27	16.88	30.2	8.47	20.86	2.99	7.9	353	320	69.71	gi|51949754|gb|AAU14795.1|	210	3e-54	homogentisate phytylprenyltransferase [Medicago sativa]	--	--	--	--	slr1736	87.4	6e-18	COG0382	4-hydroxybenzoate polyprenyltransferase and related prenyltransferases	K09833	5e-50	192	ath:AT2G18950	homogenitisate phytyltransferase	GO:0006952//defense response;GO:0006633//fatty acid biosynthetic process;GO:0042360//vitamin E metabolic process;GO:0009628//response to abiotic stimulus;GO:0045229//external encapsulating structure organization;GO:0008643//carbohydrate transport	GO:0010354	GO:0031224//intrinsic to membrane;GO:0009536//plastid
	Unigene53577	67.91	183.58	166.96	135.65	55.22	30.12	33.79	47.9	2.39	7.41	354	400	86.8914	gi|6469141|emb|CAB61752.1|	74.3	4e-13	dTDP-glucose 4-6-dehydratase [Cicer arietinum]	--	--	--	--	--	--	--	--	--	K01710	4e-13	69.7	rcu:RCOM_0983160	dTDP-glucose 4,6-dehydratase [EC:4.2.1.46]	GO:0006139//nucleobase, nucleoside, nucleotide and nucleic acid metabolic process	GO:0016831//carboxy-lyase activity;GO:0048037//cofactor binding	GO:0016020//membrane
	Unigene53688	29.15	70.3	70.8	56.4	11.54	0	5.79	2.89	2.26	4.83	355	163	35.3085	gi|167962162|dbj|BAG09370.1|	221	3e-57	peroxisomal fatty acid beta-oxidation multifunctional protein [Glycine max]	sp|O49809|MFPA_BRANA	187	2e-47	Glyoxysomal fatty acid beta-oxidation multifunctional protein MFP-a OS=Brassica napus PE=2 SV=2	DR1487_1	106	9e-24	COG1024	Enoyl-CoA hydratase/carnithine racemase	K10527	2e-50	193	osa:4326503	enoyl-CoA hydratase/3-hydroxyacyl-CoA dehydrogenase [EC:4.2.1.17 1.1.1.35 1.1.1.211]	GO:0009062//fatty acid catabolic process	GO:0016863//intramolecular oxidoreductase activity, transposing C=C bonds;GO:0016616//oxidoreductase activity, acting on the CH-OH group of donors, NAD or NADP as acceptor;GO:0048037//cofactor binding;GO:0016836//hydro-lyase activity;GO:0016856	GO:0030312//external encapsulating structure;GO:0005777//peroxisome;GO:0031981//nuclear lumen
	Unigene53805	6.69	202.91	207.42	151.89	28.68	2.57	0	3.36	6.53	15.36	357	273	58.805	gi|224114543|ref|XP_002316789.1|	166	7e-41	gibberellin 2-oxidase [Populus trichocarpa] >gi|222859854|gb|EEE97401.1| gibberellin 2-oxidase [Populus trichocarpa]	sp|Q9SQ80|G2OX1_PEA	160	2e-39	Gibberellin 2-beta-dioxygenase 1 OS=Pisum sativum GN=GA2OX1 PE=1 SV=1	--	--	--	--	--	K04125	9e-31	128	ath:AT1G78440	gibberellin 2-oxidase [EC:1.14.11.13]	GO:0008152//metabolic process	GO:0046914//transition metal ion binding;GO:0016706//oxidoreductase activity, acting on paired donors, with incorporation or reduction of molecular oxygen, 2-oxoglutarate as one donor, and incorporation of one atom each of oxygen into both donors;GO:0016701//oxidoreductase activity, acting on single donors with incorporation of molecular oxygen	-
	Unigene53826	33	278.16	293.53	163.3	29.73	2.57	17.8	12.95	7.42	18.16	357	554	119.333	gi|15234819|ref|NP_193348.1|	224	2e-58	ARA1 (ARABINOSE KINASE); ATP binding / L-arabinokinase/ galactokinase [Arabidopsis thaliana] >gi|2244971|emb|CAB10392.1| galactokinase like protein [Arabidopsis thaliana] >gi|7268362|emb|CAB78655.1| galactokinase like protein [Arabidopsis thaliana]	--	--	--	--	--	--	--	--	--	K12446	3e-61	229	vvi:100267958	L-arabinokinase [EC:2.7.1.46]	GO:0019321//pentose metabolic process;GO:0010467//gene expression;GO:0006796//phosphate metabolic process	GO:0016773//phosphotransferase activity, alcohol group as acceptor;GO:0032559//adenyl ribonucleotide binding	GO:0043231//intracellular membrane-bounded organelle
	Unigene53858	0.89	50.34	3.8	8.91	2.6	0	4.18	0	5.03	10.71	358	37	7.9477	gi|2293112|emb|CAA71598.1|	151	2e-36	potassium channel [Vicia faba]	sp|Q38898|AKT2_ARATH	107	2e-23	Potassium channel AKT2/3 OS=Arabidopsis thaliana GN=AKT2 PE=1 SV=1	--	--	--	--	--	--	--	--	--	--	GO:0009725//response to hormone stimulus;GO:0006873//cellular ion homeostasis;GO:0030001//metal ion transport	GO:0005249//voltage-gated potassium channel activity;GO:0005515//protein binding;GO:0000166//nucleotide binding	GO:0043231//intracellular membrane-bounded organelle;GO:0031224//intrinsic to membrane
	Unigene53910	17.74	82.55	80.9	53.8	11.93	14.34	11.97	10.02	4.08	19.98	359	110	23.5623	gi|115477970|ref|NP_001062580.1|	167	3e-41	Os09g0114500 [Oryza sativa Japonica Group] >gi|113630813|dbj|BAF24494.1| Os09g0114500 [Oryza sativa Japonica Group]	sp|Q9QXL1|KI21B_MOUSE	88.2	1e-17	Kinesin-like protein KIF21B OS=Mus musculus GN=Kif21b PE=1 SV=1	--	--	--	--	--	K10395	1e-31	130	ppp:PHYPADRAFT_40278	kinesin family member 4/7/21/27	GO:0007017//microtubule-based process;GO:0030198//extracellular matrix organization	GO:0003774//motor activity;GO:0032559//adenyl ribonucleotide binding	GO:0009536//plastid;GO:0015630//microtubule cytoskeleton
	Unigene54094	28.66	210.27	282.75	148.24	40.23	2.04	3.62	0.47	5.31	10.89	361	263	56.0233	gi|42566953|ref|NP_193673.2|	149	9e-36	alcohol oxidase-related [Arabidopsis thaliana] >gi|300680983|sp|O65709.2|FAO4A_ARATH RecName: Full=Long-chain-alcohol oxidase FAO4A; AltName: Full=Long-chain fatty alcohol oxidase 4A	--	--	--	--	DRA0127	62.4	2e-10	COG2303	Choline dehydrogenase and related flavoproteins	--	--	--	--	--	GO:0006950//response to stress	GO:0016899//oxidoreductase activity, acting on the CH-OH group of donors, oxygen as acceptor;GO:0030554//adenyl nucleotide binding	-
	Unigene54149	2.64	105.32	120.1	26.92	0	12.7	1.03	1.42	6.63	15.51	362	230	48.8584	gi|297821178|ref|XP_002878472.1|	162	8e-40	ATMRP10 [Arabidopsis lyrata subsp. lyrata] >gi|297324310|gb|EFH54731.1| ATMRP10 [Arabidopsis lyrata subsp. lyrata]	sp|Q9LZJ5|AB14C_ARATH	162	8e-40	ABC transporter C family member 14 OS=Arabidopsis thaliana GN=ABCC14 PE=1 SV=1	SPAC3F10.11c	47.8	5e-06	COG1132	ABC-type multidrug transport system, ATPase and permease components	--	--	--	--	--	GO:0009987//cellular process;GO:0015893//drug transport;GO:0051707//response to other organism;GO:0008152//metabolic process;GO:0006950//response to stress	GO:0017111//nucleoside-triphosphatase activity;GO:0016628//oxidoreductase activity, acting on the CH-CH group of donors, NAD or NADP as acceptor;GO:0051183//vitamin transporter activity;GO:0015405//P-P-bond-hydrolysis-driven transmembrane transporter activity;GO:0032559//adenyl ribonucleotide binding	GO:0031224//intrinsic to membrane;GO:0031090//organelle membrane;GO:0005773//vacuole
	Unigene54167	14.51	51.22	65.21	19.58	6.17	16.76	6.71	0	2.71	5.37	362	160	33.9885	gi|18422246|ref|NP_568610.1|	72.4	1e-12	BKI1 (BRI1 kinase inhibitor 1); protein heterodimerization [Arabidopsis thaliana] >gi|192571736|gb|ACF04813.1| At5g42750 [Arabidopsis thaliana]	--	--	--	--	--	--	--	--	--	--	--	--	--	--	GO:0010422//regulation of brassinosteroid biosynthetic process	GO:0046983//protein dimerization activity	GO:0016020//membrane
	Unigene54186	0.88	96.44	118.84	15.13	0	0	22.65	0.47	3.39	7.21	363	278	58.8923	gi|84514147|gb|ABC59082.1|	123	6e-28	cytochrome P450 monooxygenase CYP83E8 [Medicago truncatula]	sp|Q9LTM6|C71BH_ARATH	83.2	5e-16	Cytochrome P450 71B17 OS=Arabidopsis thaliana GN=CYP71B17 PE=2 SV=1	--	--	--	--	--	K00517	4e-17	83.2	ath:AT3G26160	[EC:1.14.-.-]	GO:0008152//metabolic process	GO:0016491//oxidoreductase activity;GO:0005506//iron ion binding	-
	Unigene54190	16.67	87.37	151.12	91.29	38.47	0.51	0	0	2.86	5.86	363	430	91.0923	gi|1360141|emb|CAA66616.1|	189	6e-48	protein kinase [Solanum berthaultii]	sp|P15792|KPK1_PHAVU	131	1e-30	Protein kinase PVPK-1 OS=Phaseolus vulgaris PE=2 SV=1	YBL105c_2	52.8	2e-07	COG0515	Serine/threonine protein kinase	K08286	1e-28	121	ath:AT3G27580	protein-serine/threonine kinase [EC:2.7.11.-]	GO:0006464//protein modification process;GO:0000904//cell morphogenesis involved in differentiation	GO:0004672//protein kinase activity;GO:0032559//adenyl ribonucleotide binding	-
	Unigene54278	3.06	33.8	60.19	62.31	24.04	7.58	1.03	5.18	2.17	4.78	364	93	19.6472	gi|87162873|gb|ABD28668.1|	206	5e-53	Peptidase C14, caspase catalytic subUnit p20 [Medicago truncatula]	sp|Q9FYE1|MCA9_ARATH	154	1e-37	Metacaspase-9 OS=Arabidopsis thaliana GN=AMC9 PE=1 SV=1	--	--	--	--	--	--	--	--	--	--	GO:0019538//protein metabolic process	GO:0004175//endopeptidase activity	GO:0005576//extracellular region
	Unigene54356	2.18	6.65	9.31	2.91	0.51	1.51	1.54	1.41	2.88	8.13	365	29	6.1098	gi|124359162|gb|ABN05685.1|	119	8e-27	RNA-directed DNA polymerase (Reverse transcriptase) [Medicago truncatula]	sp|P93295|M310_ARATH	90.1	4e-18	Uncharacterized mitochondrial protein AtMg00310 OS=Arabidopsis thaliana GN=AtMg00310 PE=4 SV=1	--	--	--	--	--	--	--	--	--	--	GO:0006260//DNA replication	GO:0003676//nucleic acid binding;GO:0034061	GO:0043231//intracellular membrane-bounded organelle
	Unigene54560	33.31	256.18	338.75	239.32	92.08	23.98	5.59	10.71	3.02	7.06	368	471	98.4222	gi|33235471|emb|CAE17327.1|	184	2e-46	lipoxygenase [Fragaria x ananassa]	sp|Q9LUW0|LOX5_ARATH	184	1e-46	Lipoxygenase 5, chloroplastic OS=Arabidopsis thaliana GN=LOX5 PE=1 SV=2	--	--	--	--	--	K00454	9e-48	184	ath:AT3G22400	lipoxygenase [EC:1.13.11.12]	GO:0006633//fatty acid biosynthetic process;GO:0048527//lateral root development	GO:0046914//transition metal ion binding;GO:0016702//oxidoreductase activity, acting on single donors with incorporation of molecular oxygen, incorporation of two atoms of oxygen	-
	Unigene54674	41.31	214.52	204.26	90.52	32.2	5.47	20.2	50.46	3.36	7.91	370	366	76.0675	gi|550452|gb|AAA53140.1|	221	2e-57	3-methylcrotonyl-CoA carboxylase, biotin-carrier domain [Glycine max]	sp|Q42777|MCCA_SOYBN	221	8e-58	Methylcrotonoyl-CoA carboxylase subUnit alpha, mitochondrial OS=Glycine max GN=MCCA PE=1 SV=2	AGl2704	158	2e-39	COG4770	Acetyl/propionyl-CoA carboxylase, alpha subUnit	K01968	7e-58	218	rcu:RCOM_0646250	3-methylcrotonyl-CoA carboxylase alpha subUnit [EC:6.4.1.4]	GO:0006551//leucine metabolic process;GO:0006464//protein modification process	GO:0019842//vitamin binding;GO:0004672//protein kinase activity;GO:0046914//transition metal ion binding;GO:0016421//CoA carboxylase activity;GO:0032559//adenyl ribonucleotide binding	GO:0031980//mitochondrial lumen;GO:0005840//ribosome
	Unigene54702	5.59	196.25	189.11	159	33.21	3.97	0	3.24	5.46	12.69	370	285	59.2329	gi|67077814|dbj|BAD99508.1|	180	5e-45	gibberellin 2-oxidase [Vigna angularis]	sp|Q9SQ80|G2OX1_PEA	176	4e-44	Gibberellin 2-beta-dioxygenase 1 OS=Pisum sativum GN=GA2OX1 PE=1 SV=1	PA4191	49.7	1e-06	COG3491	Isopenicillin N synthase and related dioxygenases	K04125	5e-41	162	ath:AT1G78440	gibberellin 2-oxidase [EC:1.14.11.13]	GO:0008152//metabolic process	GO:0046914//transition metal ion binding;GO:0016706//oxidoreductase activity, acting on paired donors, with incorporation or reduction of molecular oxygen, 2-oxoglutarate as one donor, and incorporation of one atom each of oxygen into both donors;GO:0016701//oxidoreductase activity, acting on single donors with incorporation of molecular oxygen	-
	Unigene54710	0	0	0	16.28	1.51	1.99	0	0	2.73	4.86	370	22	4.5724	gi|301099993|ref|XP_002899087.1|	119	1e-26	40S ribosomal protein S16 [Phytophthora infestans T30-4] >gi|262104399|gb|EEY62451.1| 40S ribosomal protein S16 [Phytophthora infestans T30-4]	sp|P62251|RS16_AEDAE	141	1e-33	40S ribosomal protein S16 OS=Aedes aegypti GN=RpS16 PE=2 SV=1	YMR143w	114	3e-26	COG0103	Ribosomal protein S9	K02960	1e-28	121	vvi:100250286	small subUnit ribosomal protein S16e	GO:0010467//gene expression	GO:0005198//structural molecule activity	GO:0030529//ribonucleoprotein complex
	Unigene54753	94.83	280.27	219.28	131.35	70.76	37.66	60.44	21.24	2.22	5.35	371	520	107.783	gi|76162840|gb|ABA40832.1|	131	2e-30	lethal leaf spot 1-like protein [Glycine max]	sp|Q9FYC2|PAO_ARATH	96.3	5e-20	Pheophorbide a oxygenase, chloroplastic OS=Arabidopsis thaliana GN=PAO PE=1 SV=1	--	--	--	--	--	K13071	7e-24	105	osa:4331611	pheophorbide a oxygenase [EC:1.14.12.20]	GO:0008152//metabolic process	GO:0016491//oxidoreductase activity	GO:0043231//intracellular membrane-bounded organelle
	Unigene54799	83.88	332.63	276.67	80.03	26.03	9.88	0	0	2.74	5.86	372	458	94.6766	gi|37051111|dbj|BAC81652.1|	206	7e-53	short-chain alcohol dehydrogenase A [Pisum sativum]	sp|Q7FAE1|MOMAS_ORYSJ	98.6	1e-20	Momilactone A synthase OS=Oryza sativa subsp. japonica GN=Os04g0179200 PE=2 SV=1	CC0094	73.2	1e-13	COG1028	Dehydrogenases with different specificities (related to short-chain alcohol dehydrogenases)	K09841	2e-23	103	pop:POPTR_547844	xanthoxin dehydrogenase [EC:1.1.1.288]	GO:0008152//metabolic process	GO:0016616//oxidoreductase activity, acting on the CH-OH group of donors, NAD or NADP as acceptor	-
	Unigene54805	12.41	57.77	63	43.82	17.52	7.91	6.03	2.3	3.13	7.75	372	138	28.527	gi|225348633|gb|ACN87278.1|	251	1e-66	with no lysine kinase [Glycine max]	sp|Q9CAV6|WNK1_ARATH	239	3e-63	Serine/threonine-protein kinase WNK1 OS=Arabidopsis thaliana GN=WNK1 PE=1 SV=1	ECU01g0630	70.1	9e-13	COG0515	Serine/threonine protein kinase	K12132	3e-66	246	pop:POPTR_1096507	serine/threonine-protein kinase WNK1 [EC:2.7.11.1]	GO:0006464//protein modification process;GO:0048511//rhythmic process	GO:0004702//receptor signaling protein serine/threonine kinase activity;GO:0032559//adenyl ribonucleotide binding	GO:0044464//cell part
	Unigene54806	47.08	183.08	168.92	62.4	22.02	9.39	14.07	21.64	2.93	7.92	372	447	92.4027	gi|60459371|gb|AAX20031.1|	95.1	2e-19	RING-finger protein [Capsicum annuum]	sp|Q9LY87|RGLG2_ARATH	84	3e-16	E3 ubiquitin-protein ligase RGLG2 OS=Arabidopsis thaliana GN=RGLG2 PE=1 SV=1	--	--	--	--	--	--	--	--	--	--	GO:0042445//hormone metabolic process;GO:0006725//cellular aromatic compound metabolic process	-	GO:0016020//membrane
	Unigene55535	0.83	401.8	157.42	12.95	0	0.48	0	0	229.42	501.23	383	274	55.0138	gi|226503397|ref|NP_001151204.1|	65.9	1e-10	quinone oxidoreductase-like protein At1g23740 [Zea mays] >gi|195644996|gb|ACG41966.1| quinone oxidoreductase-like protein At1g23740 [Zea mays]	sp|Q9ZUC1|QORL_ARATH	56.2	6e-08	Quinone oxidoreductase-like protein At1g23740, chloroplastic OS=Arabidopsis thaliana GN=At1g23740 PE=1 SV=2	--	--	--	--	--	--	--	--	--	--	GO:0008152//metabolic process	GO:0046914//transition metal ion binding;GO:0016491//oxidoreductase activity	GO:0043231//intracellular membrane-bounded organelle
	Unigene55559	17.83	49.64	68.11	33.23	6.3	9.57	4.87	16.95	2.82	6.54	384	142	28.4366	gi|297832976|ref|XP_002884370.1|	181	3e-45	lecithin:cholesterol acyltransferase family protein [Arabidopsis lyrata subsp. lyrata] >gi|297330210|gb|EFH60629.1| lecithin:cholesterol acyltransferase family protein [Arabidopsis lyrata subsp. lyrata]	--	--	--	--	--	--	--	--	--	--	--	--	--	--	GO:0044238//primary metabolic process	GO:0008374//O-acyltransferase activity	GO:0043231//intracellular membrane-bounded organelle
	Unigene55580	3.73	92.97	130.91	71.99	7.27	38.3	4.38	37.02	2.58	4.5	384	140	28.0361	gi|28194504|gb|AAO33578.1|AF478453_1	273	4e-73	beta-amyrin synthase [Medicago truncatula]	sp|B6EXY6|LUP4_ARATH	236	3e-62	Beta-amyrin synthase OS=Arabidopsis thaliana GN=BAS PE=2 SV=2	YHR072w	70.5	7e-13	COG1657	Squalene cyclase	K01853	2e-59	223	ath:AT1G78960	cycloartenol synthase [EC:5.4.99.8]	GO:0016104//triterpenoid biosynthetic process	GO:0031559//oxidosqualene cyclase activity	-
	Unigene55709	23.51	171.95	187.87	88.6	45.34	27.62	0	0.44	3.3	6.73	386	398	79.2895	gi|226500770|ref|NP_001148177.1|	89.7	9e-18	LOC100281785 [Zea mays] >gi|195616476|gb|ACG30068.1| acyl CoA synthetase [Zea mays]	sp|Q55DR6|FCSA_DICDI	53.5	4e-07	Fatty acyl-CoA synthetase A OS=Dictyostelium discoideum GN=fcsA PE=1 SV=1	YER015w	47.8	5e-06	COG1022	Long-chain acyl-CoA synthetases (AMP-forming)	K01897	8e-19	89	osa:4350728	long-chain acyl-CoA synthetase [EC:6.2.1.3]	GO:0006633//fatty acid biosynthetic process;GO:0006952//defense response;GO:0010102//lateral root morphogenesis	GO:0015645//fatty-acid ligase activity	-
	Unigene55715	25.16	71.39	86.24	46.37	23.63	4.76	10.65	12.87	2.7	6.02	386	233	46.4182	gi|75156113|sp|Q8LGM7.1|MOCOS_SOLLC	124	2e-28	RecName: Full=Molybdenum cofactor sulfurase; Short=MoCo sulfurase; Short=MOS >gi|22128583|gb|AAL71858.1| molybdenum cofactor sulfurase [Solanum lycopersicum]	sp|Q8LGM7|MOCOS_SOLLC	124	1e-28	Molybdenum cofactor sulfurase OS=Solanum lycopersicum GN=FLACCA PE=2 SV=1	--	--	--	--	--	--	--	--	--	--	GO:0009687//abscisic acid metabolic process;GO:0017038//protein import;GO:0009756//carbohydrate mediated signaling;GO:0042040;GO:0009755//hormone-mediated signaling pathway;GO:0006970//response to osmotic stress;GO:0006952//defense response;GO:0044249//cellular biosynthetic process	GO:0016846//carbon-sulfur lyase activity;GO:0005488//binding	-
	Unigene55721	10.72	17.06	18.48	33.51	4.34	6.19	4.84	1.77	2.15	5.3	386	84	16.7345	gi|297841581|ref|XP_002888672.1|	252	1e-66	alpha-xylosidase precursor [Arabidopsis lyrata subsp. lyrata] >gi|297334513|gb|EFH64931.1| alpha-xylosidase precursor [Arabidopsis lyrata subsp. lyrata]	sp|Q9S7Y7|XYL1_ARATH	250	2e-66	Alpha-xylosidase OS=Arabidopsis thaliana GN=XYL1 PE=1 SV=1	SPAPB24D3.10c	107	7e-24	COG1501	Alpha-glucosidases, family 31 of glycosyl hydrolases	K01187	3e-64	239	ath:AT3G45940	alpha-glucosidase [EC:3.2.1.20]	GO:0000272//polysaccharide catabolic process;GO:0010038//response to metal ion	GO:0015926//glucosidase activity;GO:0005488//binding	GO:0005618//cell wall;GO:0005576//extracellular region;GO:0031410//cytoplasmic vesicle;GO:0009536//plastid
	Unigene55731	0.82	7.18	10.56	2.3	0.96	0	0	0	6.92	12.83	386	21	4.1836	gi|140056460|gb|ABO81153.1|	200	4e-51	Polynucleotidyl transferase, Ribonuclease H fold [Medicago truncatula]	sp|Q7LHG5|YI31B_YEAST	69.7	5e-12	Transposon Ty3-I Gag-Pol polyprotein OS=Saccharomyces cerevisiae GN=TY3B-I PE=3 SV=2	YIL082w-a_2	69.7	1e-12	COG2801	Transposase and inactivated derivatives	--	--	--	--	--	GO:0006259//DNA metabolic process	GO:0003676//nucleic acid binding;GO:0016740//transferase activity	GO:0043229//intracellular organelle
	Unigene57006	8.17	57.63	79.73	19.5	4.1	3.15	3.66	6.7	6.4	21.68	409	336	63.1737	gi|297824323|ref|XP_002880044.1|	77.4	5e-14	electron-transfer flavoprotein:ubiquinone oxidoreductase [Arabidopsis lyrata subsp. lyrata] >gi|297325883|gb|EFH56303.1| electron-transfer flavoprotein:ubiquinone oxidoreductase [Arabidopsis lyrata subsp. lyrata]	sp|P94132|ETFD_ACIAD	63.5	4e-10	Probable electron transfer flavoprotein-ubiquinone oxidoreductase OS=Acinetobacter sp. (strain ADP1) GN=etfD PE=4 SV=1	NMA0766	68.2	4e-12	COG0644	Dehydrogenases (flavoproteins)	K00311	9e-16	79	vvi:100244062	electron-transferring-flavoprotein dehydrogenase [EC:1.5.5.1]	GO:0009642//response to light intensity;GO:0006551//leucine metabolic process	GO:0016649//oxidoreductase activity, acting on the CH-NH group of donors, quinone or similar compound as acceptor	GO:0031967;GO:0043231//intracellular membrane-bounded organelle
	Unigene57029	0	29.59	17.81	3.46	0	0	0	0	#DIV/0!	#DIV/0!	410	72	13.5042	gi|35187002|gb|AAQ84169.1|	244	2e-64	1-deoxy-D-xylulose 5-phosphate synthase [Pueraria montana var. lobata]	sp|O78328|DXS_CAPAN	240	2e-63	Probable 1-deoxy-D-xylulose-5-phosphate synthase, chloroplastic OS=Capsicum annuum GN=TKT2 PE=2 SV=1	mlr7474	193	6e-50	COG1154	Deoxyxylulose-5-phosphate synthase	K01662	6e-66	245	vvi:100249323	1-deoxy-D-xylulose-5-phosphate synthase [EC:2.2.1.7]	GO:0006090//pyruvate metabolic process;GO:0006772//thiamin metabolic process;GO:0006779//porphyrin biosynthetic process;GO:0006721//terpenoid metabolic process	GO:0016903//oxidoreductase activity, acting on the aldehyde or oxo group of donors;GO:0016744	GO:0009536//plastid
	Unigene57167	50.23	230.93	244.04	171.18	84.96	18.29	36.74	20.37	2.54	6.36	412	540	100.79	gi|297847914|ref|XP_002891838.1|	98.2	2e-20	BCDH BETA1 [Arabidopsis lyrata subsp. lyrata] >gi|297337680|gb|EFH68097.1| BCDH BETA1 [Arabidopsis lyrata subsp. lyrata]	sp|P35738|ODBB_RAT	69.7	5e-12	2-oxoisovalerate dehydrogenase subUnit beta, mitochondrial OS=Rattus norvegicus GN=Bckdhb PE=1 SV=3	TVN0101	48.1	4e-06	COG0022	Pyruvate/2-oxoglutarate dehydrogenase complex, dehydrogenase (E1) component, eukaryotic type, beta subUnit	K00167	7e-22	99.4	vvi:100248427	2-oxoisovalerate dehydrogenase E1 component, beta subUnit [EC:1.2.4.4]	GO:0008152//metabolic process	GO:0016624//oxidoreductase activity, acting on the aldehyde or oxo group of donors, disulfide as acceptor;GO:0004738//pyruvate dehydrogenase activity	GO:0043231//intracellular membrane-bounded organelle
	Unigene57355	8.42	77.49	78.79	17.46	3.13	0	0.45	0	6.88	15.38	416	126	23.2915	gi|15224174|ref|NP_179435.1|	54.3	4e-07	SDH1-2; succinate dehydrogenase [Arabidopsis thaliana] >gi|75216119|sp|Q9ZPX5.1|DHSA2_ARATH RecName: Full=Succinate dehydrogenase [ubiquinone] flavoprotein subUnit 2, mitochondrial; AltName: Full=Flavoprotein subUnit 2 of complex II; Short=FP; Flags: Precursor >gi|29028988|gb|AAO64873.1| At2g18450 [Arabidopsis thaliana]	sp|Q9ZPX5|DHSA2_ARATH	54.3	2e-07	Succinate dehydrogenase [ubiquinone] flavoprotein subUnit 2, mitochondrial OS=Arabidopsis thaliana GN=SDH1-2 PE=1 SV=1	--	--	--	--	--	K00234	7e-11	62.8	pop:POPTR_219180	succinate dehydrogenase (ubiquinone) flavoprotein subUnit [EC:1.3.5.1]	GO:0022904//respiratory electron transport chain	GO:0046914//transition metal ion binding;GO:0016627//oxidoreductase activity, acting on the CH-CH group of donors;GO:0032559//adenyl ribonucleotide binding	GO:0043231//intracellular membrane-bounded organelle;GO:0030312//external encapsulating structure
	Unigene57435	46.58	562.29	316.86	99.86	24.56	6.61	64.08	19.72	5.09	12.86	417	661	121.895	gi|223588270|dbj|BAH22562.1|	131	2e-30	nicotianamine synthase [Lotus japonicus]	sp|Q9XGI7|NAS_SOLLC	110	3e-24	Nicotianamine synthase OS=Solanum lycopersicum GN=CHLN PE=2 SV=1	--	--	--	--	--	K05953	7e-33	135	rcu:RCOM_1435160	nicotianamine synthase [EC:2.5.1.43]	GO:0018130	GO:0016765//transferase activity, transferring alkyl or aryl (other than methyl) groups	-
	Unigene57491	12.95	364.01	496.5	227.22	45.88	4.84	2.24	50.4	7.19	14.68	418	697	128.226	gi|23193176|gb|AAN14411.1|	248	2e-65	monofunctional lysine-ketoglutarate reductase 1 [Gossypium hirsutum] >gi|23193178|gb|AAN14412.1| monofunctional lysine-ketoglutarate reductase 2 [Gossypium hirsutum]	sp|Q9SMZ4|AASS_ARATH	239	5e-63	Alpha-aminoadipic semialdehyde synthase OS=Arabidopsis thaliana GN=LKR/SDH PE=1 SV=1	--	--	--	--	--	--	--	--	--	--	GO:0008152//metabolic process	GO:0004753//saccharopine dehydrogenase activity	GO:0043231//intracellular membrane-bounded organelle
	Unigene5864	1.04	51.55	43.46	24.98	1.06	0	0.15	0.7	37.66	79.83	1227	279	17.4856	gi|148540329|gb|ABQ85893.1|	278	1e-120	ERF transcription factor [Pisum sativum]	sp|Q6J9S1|RA211_ARATH	147	2e-34	Ethylene-responsive transcription factor RAP2-11 OS=Arabidopsis thaliana GN=RAP2-11 PE=2 SV=1	--	--	--	--	--	K09286	9e-16	81.6	ath:AT1G53910	EREBP-like factor	GO:0010468//regulation of gene expression;GO:0006350//transcription	-	GO:0043231//intracellular membrane-bounded organelle
	Unigene5954	3.63	19.11	4.52	5.39	0	0.7	3.55	0	2.66	4.35	263	17	4.9707	gi|15233493|ref|NP_194650.1|	124	3e-28	GGT4 (GAMMA-GLUTAMYL TRANSPEPTIDASE 4); gamma-glutamyltransferase/ glutathione gamma-glutamylcysteinyltransferase [Arabidopsis thaliana] >gi|7269819|emb|CAB79679.1| gamma-glutamyltransferase-like protein [Arabidopsis thaliana] >gi|110737078|dbj|BAF00492.1| gamma-glutamyltransferase-like protein [Arabidopsis thaliana]	sp|Q60928|GGT1_MOUSE	72.4	8e-13	Gamma-glutamyltranspeptidase 1 OS=Mus musculus GN=Ggt1 PE=1 SV=1	BS_ggt	69.3	2e-12	COG0405	Gamma-glutamyltransferase	K00681	2e-34	140	rcu:RCOM_1048800	gamma-glutamyltranspeptidase [EC:2.3.2.2]	GO:0006749//glutathione metabolic process	GO:0016747//transferase activity, transferring acyl groups other than amino-acyl groups;GO:0016755	GO:0043231//intracellular membrane-bounded organelle;GO:0005576//extracellular region
	Unigene60083	1.35	36.35	44.26	4.88	1.58	0	1.19	2.54	11.22	29.84	472	77	12.5449	gi|224120568|ref|XP_002318362.1|	202	9e-52	multidrug resistance protein ABC transporter family [Populus trichocarpa] >gi|222859035|gb|EEE96582.1| multidrug resistance protein ABC transporter family [Populus trichocarpa]	sp|Q9LYS2|AB10C_ARATH	186	5e-47	ABC transporter C family member 10 OS=Arabidopsis thaliana GN=ABCC10 PE=2 SV=1	YLL015w	69.7	2e-12	COG1132	ABC-type multidrug transport system, ATPase and permease components	K05666	1e-18	89	olu:OSTLU_35503	ATP-binding cassette, subfamily C (CFTR/MRP), member 2	GO:0006810//transport;GO:0008152//metabolic process	GO:0015405//P-P-bond-hydrolysis-driven transmembrane transporter activity;GO:0016628//oxidoreductase activity, acting on the CH-CH group of donors, NAD or NADP as acceptor;GO:0017111//nucleoside-triphosphatase activity;GO:0032559//adenyl ribonucleotide binding	GO:0031224//intrinsic to membrane
	Unigene60130	31.97	219.47	229.44	89.54	29.91	8.55	36.74	34.76	4.88	13.26	473	513	83.402	gi|297845746|ref|XP_002890754.1|	289	8e-78	pyridoxal-dependent decarboxylase family protein [Arabidopsis lyrata subsp. lyrata] >gi|297336596|gb|EFH67013.1| pyridoxal-dependent decarboxylase family protein [Arabidopsis lyrata subsp. lyrata]	sp|Q9C509|SGPL_ARATH	289	6e-78	Sphingosine-1-phosphate lyase OS=Arabidopsis thaliana GN=At1g27980 PE=2 SV=1	YDR294c	140	1e-33	COG0076	Glutamate decarboxylase and related PLP-dependent proteins	K01634	1e-79	291	vvi:100259208	sphinganine-1-phosphate aldolase [EC:4.1.2.27]	GO:0043436;GO:0006665//sphingolipid metabolic process;GO:0006519//cellular amino acid and derivative metabolic process	GO:0048037//cofactor binding;GO:0016832//aldehyde-lyase activity	GO:0043231//intracellular membrane-bounded organelle
	Unigene60207	13.41	35.02	33.25	26.11	7.84	7.35	0.79	3.61	2.35	5.21	475	251	40.635	gi|224054732|ref|XP_002298356.1|	173	6e-43	glycoside hydrolase [Populus trichocarpa] >gi|222845614|gb|EEE83161.1| glycoside hydrolase [Populus trichocarpa]	sp|P52409|E13B_WHEAT	116	7e-26	Glucan endo-1,3-beta-glucosidase OS=Triticum aestivum GN=GLC1 PE=2 SV=1	YPO2725	50.8	1e-06	COG3501	Uncharacterized protein conserved in bacteria	K01199	1e-12	68.9	ath:AT3G57260	glucan endo-1,3-beta-D-glucosidase [EC:3.2.1.39]	GO:0044238//primary metabolic process	GO:0043167//ion binding;GO:0008422//beta-glucosidase activity	GO:0030312//external encapsulating structure
	Unigene60226	21.07	176.21	201.23	88.6	16.04	1.54	12.96	10.08	7.37	19.65	476	535	86.4305	gi|15234819|ref|NP_193348.1|	171	3e-42	ARA1 (ARABINOSE KINASE); ATP binding / L-arabinokinase/ galactokinase [Arabidopsis thaliana] >gi|2244971|emb|CAB10392.1| galactokinase like protein [Arabidopsis thaliana] >gi|7268362|emb|CAB78655.1| galactokinase like protein [Arabidopsis thaliana]	--	--	--	--	--	--	--	--	--	K12446	7e-44	172	vvi:100267958	L-arabinokinase [EC:2.7.1.46]	GO:0019321//pentose metabolic process;GO:0010467//gene expression;GO:0006796//phosphate metabolic process	GO:0016773//phosphotransferase activity, alcohol group as acceptor;GO:0032559//adenyl ribonucleotide binding	GO:0044424//intracellular part
	Unigene60324	1	1.09	12.44	87.86	15.97	0	0	0	2.12	4.32	478	104	16.7311	gi|224100749|ref|XP_002334340.1|	118	2e-26	cytochrome P450 [Populus trichocarpa] >gi|222871210|gb|EEF08341.1| cytochrome P450 [Populus trichocarpa]	sp|Q9FMY1|C86B1_ARATH	100	3e-21	Cytochrome P450 86B1 OS=Arabidopsis thaliana GN=CYP86B1 PE=2 SV=1	--	--	--	--	--	K00517	1e-25	112	ath:AT5G52320	[EC:1.14.-.-]	GO:0008152//metabolic process	GO:0046872//metal ion binding;GO:0016491//oxidoreductase activity	-
	Unigene60352	0	0	0	22.57	3.11	2.3	0	0	2.42	4.27	479	53	8.5086	gi|115487356|ref|NP_001066165.1|	180	7e-45	Os12g0150100 [Oryza sativa Japonica Group] >gi|113648672|dbj|BAF29184.1| Os12g0150100 [Oryza sativa Japonica Group]	sp|Q95WA0|RL26_LITLI	213	4e-55	60S ribosomal protein L26 OS=Littorina littorea GN=RPL26 PE=2 SV=1	SPBC29B5.03c	146	1e-35	COG0198	Ribosomal protein L24	K02898	1e-47	185	vvi:100267018	large subUnit ribosomal protein L26e	GO:0010467//gene expression	GO:0005198//structural molecule activity	GO:0043231//intracellular membrane-bounded organelle;GO:0033279
	Unigene6080	0.31	13.01	8.39	9.81	0.74	1.09	0	4.06	2.56	5.62	506	47	7.1428	gi|66773807|sp|Q93XK2.1|STSYN_PEA	359	9e-99	RecName: Full=Stachyose synthase; AltName: Full=Galactinol--raffinose galactosyltransferase; Flags: Precursor >gi|13992585|emb|CAC38094.1| stachyose synthase [Pisum sativum]	sp|Q93XK2|STSYN_PEA	359	6e-99	Stachyose synthase OS=Pisum sativum GN=STS1 PE=1 SV=1	--	--	--	--	--	K06611	8e-73	269	ath:AT5G40390	stachyose synthetase [EC:2.4.1.67]	GO:0009312//oligosaccharide biosynthetic process;GO:0005985//sucrose metabolic process;GO:0019406;GO:0006950//response to stress;GO:0006464//protein modification process	GO:0004672//protein kinase activity;GO:0008378//galactosyltransferase activity;GO:0032559//adenyl ribonucleotide binding	GO:0009536//plastid
	Unigene61017	59.5	190.46	230.22	99.88	78.99	44.19	31.33	50.17	2.2	6.77	495	604	93.8322	gi|189332855|dbj|BAG41961.1|	202	1e-51	CBL-interacting protein kinase 1 [Vicia faba]	sp|Q5W736|CIPKI_ORYSJ	174	2e-43	CBL-interacting protein kinase 18 OS=Oryza sativa subsp. japonica GN=CIPK18 PE=2 SV=1	--	--	--	--	--	K00924	2e-26	115	osa:4342410	[EC:2.7.1.-]	GO:0009987//cellular process	GO:0004674//protein serine/threonine kinase activity;GO:0000166//nucleotide binding	-
	Unigene61056	1.28	41.58	42.46	13.22	0	0.37	0	0	25.25	57.67	496	182	28.2169	gi|161878914|gb|ABX79949.1|	65.1	3e-10	R2R3 MYB transcription factor [Rosa hybrid cultivar]	sp|Q9FNV8|MY114_ARATH	54.3	4e-07	Transcription factor MYB114 OS=Arabidopsis thaliana GN=MYB114 PE=1 SV=1	--	--	--	--	--	K09422	4e-08	54.3	ath:AT1G66380	myb proto-oncogene protein, plant	GO:0010468//regulation of gene expression	GO:0003676//nucleic acid binding	GO:0043231//intracellular membrane-bounded organelle
	Unigene61084	0	48.47	77.57	8.56	0	0.37	13.16	0.69	3.41	7.28	497	60	9.2836	gi|84514147|gb|ABC59082.1|	252	2e-66	cytochrome P450 monooxygenase CYP83E8 [Medicago truncatula]	sp|O65782|C83B1_ARATH	137	3e-32	Cytochrome P450 83B1 OS=Arabidopsis thaliana GN=CYP83B1 PE=1 SV=1	--	--	--	--	--	K11818	3e-33	137	ath:AT4G31500	cytochrome P450, family 83, subfamily B, polypeptide 1 [EC:1.14.-.-]	GO:0008152//metabolic process	GO:0016491//oxidoreductase activity;GO:0005506//iron ion binding	-
	Unigene61129	22.06	51.85	60.7	88.24	31.4	15.87	6.38	6.88	2.13	4.76	498	221	34.1258	gi|42569089|ref|NP_179293.3|	268	2e-71	mechanosensitive ion channel domain-containing protein / MS ion channel domain-containing protein [Arabidopsis thaliana]	sp|Q9SYM1|Y1861_ARATH	254	2e-67	Uncharacterized mscS family protein At1g78610 OS=Arabidopsis thaliana GN=At1g78610 PE=1 SV=1	SPCC1183.11	85.9	3e-17	COG0668	Small-conductance mechanosensitive channel	--	--	--	--	--	GO:0006810//transport	-	GO:0016020//membrane
	Unigene61166	0	140.65	222.59	61.43	17.16	0.37	0	38.1	3.72	7.77	499	72	11.0956	gi|224093824|ref|XP_002310007.1|	217	4e-56	cytochrome P450 [Populus trichocarpa] >gi|222852910|gb|EEE90457.1| cytochrome P450 [Populus trichocarpa]	sp|Q50EK4|C75A1_PINTA	130	5e-30	Cytochrome P450 750A1 OS=Pinus taeda GN=CYP750A1 PE=2 SV=1	--	--	--	--	--	K00517	8e-24	106	ath:AT5G24960	[EC:1.14.-.-]	GO:0008152//metabolic process	GO:0005506//iron ion binding;GO:0004497//monooxygenase activity	-
	Unigene6122	0	0	0	2.45	0	0	0	0	#DIV/0!	#DIV/0!	289	9	2.3948	gi|9653244|ref|NP_062490.1|	61.6	3e-09	ATP synthase F0 subUnit 9 [Chondrus crispus] >gi|1352021|sp|P48880.1|ATP9_CHOCR RecName: Full=ATP synthase subUnit 9, mitochondrial; AltName: Full=Lipid-binding protein >gi|1334491|emb|CAA87613.1| ATP synthetase, subUnit 9 [Chondrus crispus]	sp|Q9U505|ATP9_MANSE	94.7	2e-19	ATP synthase lipid-binding protein, mitochondrial OS=Manduca sexta PE=2 SV=1	--	--	--	--	--	K02128	5e-07	49.3	pop:POPTR_794906	F-type H+-transporting ATPase subUnit c [EC:3.6.3.14]	GO:0006818//hydrogen transport;GO:0006754//ATP biosynthetic process	GO:0015078//hydrogen ion transmembrane transporter activity;GO:0003824//catalytic activity;GO:0032559//adenyl ribonucleotide binding	GO:0031224//intrinsic to membrane;GO:0033177//proton-transporting two-sector ATPase complex, proton-transporting domain;GO:0005740//mitochondrial envelope
	Unigene61237	82.94	207.89	271.19	188.87	106.28	16.51	66.77	63.59	2.09	4.71	501	436	66.922	gi|31088360|gb|AAP44102.1|	335	1e-91	peptide transporter 1 [Vicia faba]	sp|P46032|PTR2_ARATH	279	5e-75	Peptide transporter PTR2 OS=Arabidopsis thaliana GN=PTR2 PE=1 SV=1	--	--	--	--	--	K03305	3e-78	287	pop:POPTR_805077	proton-dependent oligopeptide transporter, POT family	GO:0006857//oligopeptide transport	GO:0015198//oligopeptide transporter activity;GO:0015103//inorganic anion transmembrane transporter activity	GO:0005773//vacuole;GO:0031090//organelle membrane;GO:0031224//intrinsic to membrane
	Unigene61287	78.81	997.43	1037.92	217.36	203.95	80.04	78.39	0	3.68	9.05	503	1492	228.098	gi|134054010|gb|ABD28319.2|	198	2e-50	Sterol desaturase [Medicago truncatula]	sp|Q8H1Z0|WAX2_ARATH	114	3e-25	Protein WAX2 OS=Arabidopsis thaliana GN=WAX2 PE=1 SV=1	--	--	--	--	--	--	--	--	--	--	GO:0006633//fatty acid biosynthetic process;GO:0007275//multicellular organismal development;GO:0006081//cellular aldehyde metabolic process	GO:0046914//transition metal ion binding;GO:0016830//carbon-carbon lyase activity	GO:0043231//intracellular membrane-bounded organelle;GO:0031224//intrinsic to membrane
	Unigene61383	15.22	118.41	98.11	129.9	48.96	14.65	2.61	13.65	2.36	5.51	502	524	80.269	gi|57232107|gb|AAW47739.1|	278	2e-74	beta-galactosidase [Prunus persica]	sp|Q9SCV9|BGAL3_ARATH	262	9e-70	Beta-galactosidase 3 OS=Arabidopsis thaliana GN=BGAL3 PE=1 SV=1	--	--	--	--	--	K01190	2e-45	177	ath:AT3G52840	beta-galactosidase [EC:3.2.1.23]	GO:0044238//primary metabolic process	GO:0030246//carbohydrate binding;GO:0043167//ion binding;GO:0015925	GO:0044464//cell part;GO:0043234//protein complex
	Unigene61584	16.2	66.13	63.15	13.52	4.74	1.08	0.73	0	2.94	6.36	511	247	37.1703	gi|224072274|ref|XP_002303684.1|	318	1e-86	oligopeptide transporter OPT family [Populus trichocarpa] >gi|222841116|gb|EEE78663.1| oligopeptide transporter OPT family [Populus trichocarpa]	sp|O82485|OPT7_ARATH	306	4e-83	Oligopeptide transporter 7 OS=Arabidopsis thaliana GN=OPT7 PE=2 SV=1	--	--	--	--	--	--	--	--	--	--	GO:0015833//peptide transport	GO:0015197//peptide transporter activity	GO:0044464//cell part
	Unigene61658	18	119.25	85.08	121.24	29.76	10.75	6.56	17.36	3.65	10.44	513	352	52.7649	gi|3860321|emb|CAA10128.1|	219	1e-56	beta-galactosidase [Cicer arietinum]	sp|Q9SCV9|BGAL3_ARATH	196	5e-50	Beta-galactosidase 3 OS=Arabidopsis thaliana GN=BGAL3 PE=1 SV=1	SP0060	95.1	5e-20	COG1874	Beta-galactosidase	K01190	2e-46	181	ath:AT3G52840	beta-galactosidase [EC:3.2.1.23]	GO:0044238//primary metabolic process	GO:0030246//carbohydrate binding;GO:0043167//ion binding;GO:0015925	GO:0044464//cell part;GO:0043234//protein complex
	Unigene61762	2.77	110.62	121.22	58.95	38.89	0	3.98	24.52	2.49	4.88	517	419	62.3223	gi|294440409|gb|ADE74625.1|	231	4e-60	truncated mitochondrial basic amino acid carrier 2 [Arabidopsis thaliana]	sp|O43772|MCAT_HUMAN	104	3e-22	Mitochondrial carnitine/acylcarnitine carrier protein OS=Homo sapiens GN=SLC25A20 PE=1 SV=1	--	--	--	--	--	K03454	9e-19	89.7	osa:4349476	mitochondrial carrier protein, MC family	GO:0006970//response to osmotic stress;GO:0015809//arginine transport;GO:0006560//proline metabolic process;GO:0046907//intracellular transport	GO:0015179//L-amino acid transmembrane transporter activity	GO:0031224//intrinsic to membrane;GO:0043231//intracellular membrane-bounded organelle;GO:0019866//organelle inner membrane
	Unigene61763	63.43	175.98	221.41	141.9	69.14	12.8	53.86	42.74	2.6	5.9	517	825	122.711	gi|31088360|gb|AAP44102.1|	343	4e-94	peptide transporter 1 [Vicia faba]	sp|P46032|PTR2_ARATH	304	2e-82	Peptide transporter PTR2 OS=Arabidopsis thaliana GN=PTR2 PE=1 SV=1	ECU11g1050	76.3	3e-14	COG3104	Dipeptide/tripeptide permease	K03305	1e-87	318	pop:POPTR_805077	proton-dependent oligopeptide transporter, POT family	GO:0006857//oligopeptide transport	GO:0015198//oligopeptide transporter activity;GO:0015103//inorganic anion transmembrane transporter activity	GO:0005773//vacuole;GO:0031090//organelle membrane;GO:0031224//intrinsic to membrane
	Unigene61976	6.68	17.86	18.47	11.84	6.75	0.7	0	1.31	2.38	3.88	524	72	10.5663	gi|37781495|gb|AAP40636.1|	258	3e-68	cellulose synthase 6 [Populus tremuloides]	sp|Q6YVM4|CESA6_ORYSJ	252	8e-67	Probable cellulose synthase A catalytic subUnit 6 [UDP-forming] OS=Oryza sativa subsp. japonica GN=CESA6 PE=2 SV=1	--	--	--	--	--	K10999	2e-69	258	pop:POPTR_773643	cellulose synthase A [EC:2.4.1.12]	GO:0045229//external encapsulating structure organization;GO:0009250//glucan biosynthetic process	GO:0016759//cellulose synthase activity;GO:0046914//transition metal ion binding	GO:0031224//intrinsic to membrane
	Unigene62069	5.74	54.92	64.13	75.99	25.08	12.56	1.06	1.95	2.59	5.61	527	341	49.7581	gi|33235471|emb|CAE17327.1|	218	4e-56	lipoxygenase [Fragaria x ananassa]	sp|Q9LUW0|LOX5_ARATH	188	1e-47	Lipoxygenase 5, chloroplastic OS=Arabidopsis thaliana GN=LOX5 PE=1 SV=2	--	--	--	--	--	K00454	1e-48	188	ath:AT3G22400	lipoxygenase [EC:1.13.11.12]	GO:0006633//fatty acid biosynthetic process	GO:0046914//transition metal ion binding;GO:0016702//oxidoreductase activity, acting on single donors with incorporation of molecular oxygen, incorporation of two atoms of oxygen	-
	Unigene62090	19.9	59.08	64.01	33.56	24.33	13.93	12.74	12.33	2.15	6.75	528	353	51.4116	gi|164605542|dbj|BAF98608.1|	267	4e-71	CM0545.430.nc [Lotus japonicus]	sp|Q3UDK1|TRAD1_MOUSE	80.5	5e-15	TRAF-type zinc finger domain-containing protein 1 OS=Mus musculus GN=Trafd1 PE=1 SV=1	--	--	--	--	--	--	--	--	--	--	GO:0019941//modification-dependent protein catabolic process	GO:0046914//transition metal ion binding;GO:0016787//hydrolase activity	GO:0044464//cell part
	Unigene62095	4.22	16.41	27.66	11.08	2.82	5.92	2.48	0.32	3.11	7.31	528	49	7.1364	gi|297726261|ref|NP_001175494.1|	266	1e-70	Os08g0280200 [Oryza sativa Japonica Group] >gi|255678318|dbj|BAH94222.1| Os08g0280200 [Oryza sativa Japonica Group]	sp|Q6ZCX3|FH6_ORYSJ	266	7e-71	Formin-like protein 6 OS=Oryza sativa subsp. japonica GN=FH6 PE=2 SV=2	--	--	--	--	--	--	--	--	--	--	GO:0006259//DNA metabolic process;GO:0007010//cytoskeleton organization	GO:0008092//cytoskeletal protein binding;GO:0003916//DNA topoisomerase activity;GO:0017111//nucleoside-triphosphatase activity;GO:0032559//adenyl ribonucleotide binding	GO:0016020//membrane;GO:0015629//actin cytoskeleton
	Unigene62125	7.52	80.26	85.4	35.84	12.67	0.7	4.59	2.91	5.3	13.27	529	58	8.4313	gi|42567183|ref|NP_194478.3|	70.5	1e-11	glycosyltransferase family 14 protein / core-2/I-branching enzyme family protein [Arabidopsis thaliana] >gi|186514118|ref|NP_001119069.1| glycosyltransferase family 14 protein / core-2/I-branching enzyme family protein [Arabidopsis thaliana]	--	--	--	--	--	--	--	--	--	--	--	--	--	--	GO:0005975//carbohydrate metabolic process	GO:0035252//UDP-xylosyltransferase activity	GO:0031224//intrinsic to membrane
	Unigene62163	19.22	136.68	107.67	145.44	52.69	45.44	14.1	0	2.47	4.69	530	480	69.6443	gi|3549681|emb|CAA20592.1|	245	2e-64	male sterility 2-like protein [Arabidopsis thaliana]	sp|Q93ZB9|FACR3_ARATH	245	1e-64	Fatty acyl-CoA reductase 3 OS=Arabidopsis thaliana GN=FAR3 PE=2 SV=1	--	--	--	--	--	K13356	4e-60	227	vvi:100254606	fatty acyl-CoA reductase [EC:1.2.1.-]	GO:0006633//fatty acid biosynthetic process;GO:0006970//response to osmotic stress;GO:0009555//pollen development;GO:0010017//red or far red light signaling pathway	GO:0030528//transcription regulator activity;GO:0005488//binding;GO:0016620//oxidoreductase activity, acting on the aldehyde or oxo group of donors, NAD or NADP as acceptor	GO:0009536//plastid
	Unigene62279	79.9	237.23	173.65	105.19	26.85	32.36	52.49	22.13	2.15	5.44	534	430	61.9223	gi|76162840|gb|ABA40832.1|	303	5e-82	lethal leaf spot 1-like protein [Glycine max]	sp|Q9FYC2|PAO_ARATH	246	5e-65	Pheophorbide a oxygenase, chloroplastic OS=Arabidopsis thaliana GN=PAO PE=1 SV=1	all2097	145	4e-35	COG4638	Phenylpropionate dioxygenase and related ring-hydroxylating dioxygenases, large terminal subUnit	K13071	4e-76	280	pop:POPTR_1117517	pheophorbide a oxygenase [EC:1.14.12.20]	GO:0042742//defense response to bacterium;GO:0006787;GO:0009791//post-embryonic development;GO:0048608//reproductive structure development	GO:0043169//cation binding;GO:0051536//iron-sulfur cluster binding;GO:0016628//oxidoreductase activity, acting on the CH-CH group of donors, NAD or NADP as acceptor;GO:0016730//oxidoreductase activity, acting on iron-sulfur proteins as donors;GO:0016703	GO:0009528//plastid inner membrane
	Unigene62423	13.02	159.77	290.42	99.14	19.38	13.67	0.35	0	9.45	20.03	538	474	67.7511	gi|8918273|dbj|BAA97559.1|	355	2e-97	mixed-amyrin synthase [Pisum sativum]	sp|Q8RWT0|LUP2_ARATH	272	8e-73	Lupeol synthase 2 OS=Arabidopsis thaliana GN=LUP2 PE=2 SV=1	SPAC4G9.21c	159	3e-39	COG1657	Squalene cyclase	K01853	8e-74	272	ath:AT1G78960	cycloartenol synthase [EC:5.4.99.8]	GO:0016104//triterpenoid biosynthetic process	GO:0031559//oxidosqualene cyclase activity	-
	Unigene62477	40.98	104.94	116.37	60.71	20	2.04	34.26	1.9	2.29	4.12	540	245	34.8893	gi|4325041|gb|AAD17230.1|	237	5e-62	FtsH-like protein Pftf precursor [Nicotiana tabacum]	sp|Q655S1|FTSH2_ORYSJ	229	6e-60	Cell division protease ftsH homolog 2, chloroplastic OS=Oryza sativa subsp. japonica GN=FTSH2 PE=3 SV=1	slr0228	127	1e-29	COG0465	ATP-dependent Zn proteases	K03798	3e-64	240	vvi:100250511	cell division protease FtsH [EC:3.4.24.-]	GO:0009057//macromolecule catabolic process;GO:0019538//protein metabolic process;GO:0009987//cellular process	GO:0004175//endopeptidase activity;GO:0046914//transition metal ion binding;GO:0042623//ATPase activity, coupled;GO:0032559//adenyl ribonucleotide binding	GO:0043231//intracellular membrane-bounded organelle;GO:0031224//intrinsic to membrane
	Unigene630	0	0	0	15.24	2	1.98	0	0	2.54	3.93	372	15	3.1008	gi|115461330|ref|NP_001054265.1|	63.2	9e-10	Os04g0677500 [Oryza sativa Japonica Group] >gi|38344200|emb|CAE05765.2| OSJNBa0064G10.16 [Oryza sativa (japonica cultivar-group)] >gi|90399037|emb|CAJ86233.1| H0402C08.9 [Oryza sativa (indica cultivar-group)] >gi|113565836|dbj|BAF16179.1| Os04g0677500 [Oryza sativa Japonica Group] >gi|169244465|gb|ACA50506.1| pyruvate kinase [Oryza sativa Japonica Group]	sp|O62619|KPYK_DROME	117	2e-26	Pyruvate kinase OS=Drosophila melanogaster GN=PyK PE=1 SV=2	SPAC4H3.10c	86.7	1e-17	COG0469	Pyruvate kinase	K00873	4e-11	63.2	osa:4337406	pyruvate kinase [EC:2.7.1.40]	GO:0010038//response to metal ion	GO:0016301//kinase activity	GO:0016020//membrane
	Unigene63015	25.44	144.99	125.32	76.03	43.45	6.27	26.84	13.84	2.66	6.51	557	713	98.4361	gi|22327641|ref|NP_199593.2|	296	1e-79	FRA1 (FRAGILE FIBER 1); microtubule motor [Arabidopsis thaliana] >gi|30695302|ref|NP_851151.1| FRA1 (FRAGILE FIBER 1); microtubule motor [Arabidopsis thaliana] >gi|27260890|gb|AAN86114.1| kinesin-like protein [Arabidopsis thaliana] >gi|27260892|gb|AAN86115.1| kinesin-like protein [Arabidopsis thaliana]	sp|P33174|KIF4_MOUSE	107	5e-23	Chromosome-associated kinesin KIF4 OS=Mus musculus GN=Kif4 PE=2 SV=2	--	--	--	--	--	K10395	6e-50	193	ath:AT5G60930	kinesin family member 4/7/21/27	GO:0007017//microtubule-based process;GO:0030198//extracellular matrix organization	GO:0003774//motor activity;GO:0032559//adenyl ribonucleotide binding	GO:0009536//plastid;GO:0015630//microtubule cytoskeleton
	Unigene63023	4.56	97.83	187.79	44.78	4	3.29	0	0.92	24.13	53.98	558	362	49.8878	gi|8918273|dbj|BAA97559.1|	345	2e-94	mixed-amyrin synthase [Pisum sativum]	sp|B6EXY6|LUP4_ARATH	261	3e-69	Beta-amyrin synthase OS=Arabidopsis thaliana GN=BAS PE=2 SV=2	SPAC13G7.01c	71.2	1e-12	COG1657	Squalene cyclase	K01853	2e-67	251	ath:AT1G78960	cycloartenol synthase [EC:5.4.99.8]	GO:0016104//triterpenoid biosynthetic process	GO:0031559//oxidosqualene cyclase activity	-
	Unigene63073	4.26	127.5	9.7	3.48	7.65	0	2	2.45	6.13	15.16	560	287	39.4107	gi|16323087|gb|AAL15278.1|	224	6e-58	AT3g01490/F4P13_4 [Arabidopsis thaliana] >gi|110742522|dbj|BAE99178.1| protein kinase like protein [Arabidopsis thaliana]	sp|Q2MHE4|HT1_ARATH	86.3	1e-16	Serine/threonine-protein kinase HT1 OS=Arabidopsis thaliana GN=HT1 PE=1 SV=1	--	--	--	--	--	K04424	6e-13	70.5	ath:AT5G11850	sterile alpha motif and leucine zipper containing kinase AZK [EC:2.7.11.25]	GO:0006464//protein modification process	GO:0004713//protein tyrosine kinase activity;GO:0032559//adenyl ribonucleotide binding	GO:0016020//membrane
	Unigene63161	1.41	7.08	5.73	2.52	1.65	1.31	1	0.3	3.09	7.63	563	48	6.5562	gi|15225398|ref|NP_182030.1|	248	4e-65	matrix metalloproteinase [Arabidopsis thaliana] >gi|31711730|gb|AAP68221.1| At2g45040 [Arabidopsis thaliana]	sp|P29136|MEP1_SOYBN	157	4e-38	Metalloendoproteinase 1 OS=Glycine max PE=1 SV=2	--	--	--	--	--	K07761	3e-43	171	ath:AT1G59970	gelatinase A [EC:3.4.24.24]	GO:0019538//protein metabolic process	GO:0004175//endopeptidase activity;GO:0046914//transition metal ion binding	GO:0044421//extracellular region part;GO:0031224//intrinsic to membrane;GO:0031410//cytoplasmic vesicle
	Unigene63239	87.35	290.78	300.89	263.14	134.45	81.67	37.37	114.59	2.12	5.27	565	1414	192.451	gi|6177796|dbj|BAA86060.1|	367	1e-101	JPR ORF1 [Pyrus pyrifolia]	sp|Q8CHR6|DPYD_MOUSE	168	2e-41	Dihydropyrimidine dehydrogenase [NADP+] OS=Mus musculus GN=Dpyd PE=2 SV=1	BMEI1639_1	167	1e-41	COG0167	Dihydroorotate dehydrogenase	K00207	3e-95	343	osa:4330657	dihydropyrimidine dehydrogenase (NADP+) [EC:1.3.1.2]	GO:0019856//pyrimidine base biosynthetic process;GO:0009174	GO:0004152//dihydroorotate dehydrogenase activity;GO:0016628//oxidoreductase activity, acting on the CH-CH group of donors, NAD or NADP as acceptor	GO:0043231//intracellular membrane-bounded organelle
	Unigene63283	7.86	45.85	44.33	24.38	5.25	7.13	9.89	13.59	2.81	9.27	567	202	27.3961	gi|18182311|gb|AAL65125.1|	201	4e-51	GT-2 factor [Glycine max]	sp|Q6NZR2|CK061_MOUSE	52.4	2e-06	Uncharacterized protein C11orf61 homolog OS=Mus musculus PE=1 SV=1	--	--	--	--	--	--	--	--	--	--	GO:0010468//regulation of gene expression	GO:0003676//nucleic acid binding	-
	Unigene63359	29.33	76.01	99.22	25.18	3.92	4.19	9.18	0	2.28	4.94	570	317	42.7666	gi|6554181|gb|AAF16627.1|AC011661_5	214	5e-55	T23J18.8 [Arabidopsis thaliana]	sp|P07761|SLSG6_BRAOL	163	6e-40	S-locus-specific glycoprotein S6 OS=Brassica oleracea GN=SLSG PE=2 SV=2	--	--	--	--	--	--	--	--	--	--	GO:0044260;GO:0044238//primary metabolic process	GO:0030246//carbohydrate binding;GO:0004672//protein kinase activity;GO:0000166//nucleotide binding	-
	Unigene63368	1.12	26.76	33.37	6.84	0.98	0	0	3.91	5.71	13.19	570	80	10.7928	gi|297789928|ref|XP_002862884.1|	280	1e-74	HSP70T-2 [Arabidopsis lyrata subsp. lyrata] >gi|297308648|gb|EFH39143.1| HSP70T-2 [Arabidopsis lyrata subsp. lyrata]	sp|P26413|HSP70_SOYBN	124	5e-28	Heat shock 70 kDa protein OS=Glycine max GN=HSP70 PE=3 SV=1	TM0373	117	1e-26	COG0443	Molecular chaperone	K03283	6e-30	127	rcu:RCOM_1442280	heat shock 70kDa protein 1/8	GO:0009642//response to light intensity;GO:0044267//cellular protein metabolic process;GO:0000302//response to reactive oxygen species	GO:0016491//oxidoreductase activity;GO:0019899//enzyme binding;GO:0032559//adenyl ribonucleotide binding	-
	Unigene63379	9.2	34.6	46.7	30.1	4.56	4.83	4.91	3	4.04	13.76	571	127	17.1036	gi|15220455|ref|NP_176918.1|	241	5e-63	leucine-rich repeat family protein [Arabidopsis thaliana] >gi|3176660|gb|AAC18784.1| Similar to ERECTA receptor protein kinase gb|U47029 from A. thaliana [Arabidopsis thaliana] >gi|224589465|gb|ACN59266.1| leucine-rich repeat receptor-like protein kinase [Arabidopsis thaliana]	sp|O49318|Y2317_ARATH	110	4e-24	Probable leucine-rich repeat receptor-like protein kinase At2g33170 OS=Arabidopsis thaliana GN=At2g33170 PE=2 SV=1	alr0124_1	58.5	7e-09	COG4886	Leucine-rich repeat (LRR) protein	K13420	4e-28	120	rcu:RCOM_0633880	LRR receptor-like serine/threonine-protein kinase FLS2 [EC:2.7.11.1]	GO:0006464//protein modification process;GO:0007167//enzyme linked receptor protein signaling pathway	GO:0004672//protein kinase activity;GO:0032559//adenyl ribonucleotide binding	GO:0016020//membrane;GO:0031410//cytoplasmic vesicle
	Unigene63436	30.56	146.99	129.53	103.29	45.49	54.54	15	42.75	2.32	5.81	573	589	79.0462	gi|124360882|gb|ABN08854.1|	124	7e-28	Glycosyl transferase, family 8 [Medicago truncatula]	sp|Q93ZX7|GAUT4_ARATH	68.6	3e-11	Probable galacturonosyltransferase 4 OS=Arabidopsis thaliana GN=GAUT4 PE=2 SV=1	--	--	--	--	--	--	--	--	--	--	GO:0005975//carbohydrate metabolic process	GO:0008194//UDP-glycosyltransferase activity	-
	Unigene63454	9.45	54.44	51.28	47.93	13	10.91	18.26	22.42	2.28	6.73	573	269	36.1009	gi|297846030|ref|XP_002890896.1|	216	1e-55	FAD-binding domain-containing protein [Arabidopsis lyrata subsp. lyrata] >gi|297336738|gb|EFH67155.1| FAD-binding domain-containing protein [Arabidopsis lyrata subsp. lyrata]	sp|Q9SVG4|RETOL_ARATH	166	1e-40	Reticuline oxidase-like protein OS=Arabidopsis thaliana GN=At4g20830 PE=1 SV=2	--	--	--	--	--	--	--	--	--	--	GO:0008152//metabolic process	GO:0030554//adenyl nucleotide binding;GO:0046993	-
	Unigene63476	25.52	125.9	131.37	59.89	22.06	9.29	26.7	13.43	3.96	11.25	574	271	36.3059	gi|124484399|dbj|BAF46310.1|	190	8e-48	SEC14 cytosolic factor / phosphoglyceride transfer family protein [Ipomoea nil]	--	--	--	--	--	--	--	--	--	--	--	--	--	--	GO:0051234//establishment of localization	-	-
	Unigene6391	5.63	23.63	24.02	6.71	2.35	1.86	4.25	0.43	3.22	7.44	396	41	7.9618	gi|15226861|ref|NP_178313.1|	53.9	5e-07	PTR2 (PEPTIDE TRANSPORTER 2); dipeptide transporter/ high affinity oligopeptide transporter/ nitrate transmembrane transporter/ peptide transporter/ transporter/ tripeptide transporter [Arabidopsis thaliana] >gi|1172704|sp|P46032.1|PTR2_ARATH RecName: Full=Peptide transporter PTR2; AltName: Full=Histidine-transporting protein >gi|13937185|gb|AAK50086.1|AF372946_1 At2g02040/F14H20.11 [Arabidopsis …	sp|P46032|PTR2_ARATH	53.9	3e-07	Peptide transporter PTR2 OS=Arabidopsis thaliana GN=PTR2 PE=1 SV=1	--	--	--	--	--	K03305	3e-08	53.9	pop:POPTR_805077	proton-dependent oligopeptide transporter, POT family	GO:0006857//oligopeptide transport	GO:0015198//oligopeptide transporter activity;GO:0015103//inorganic anion transmembrane transporter activity	GO:0005773//vacuole;GO:0031090//organelle membrane;GO:0031224//intrinsic to membrane
	Unigene6493	6.99	17.45	21.55	12.65	5.45	1.91	1.82	7.42	2.32	4.62	1639	314	14.7323	gi|562006|gb|AAA82975.1|	546	0	PsHSP71.2 [Pisum sativum] >gi|1771479|emb|CAA67867.1| heat shock protein hsp70 [Pisum sativum]	sp|P26413|HSP70_SOYBN	505	0	Heat shock 70 kDa protein OS=Glycine max GN=HSP70 PE=3 SV=1	SPAC13G7.02c	382	0	COG0443	Molecular chaperone	K03283	0	493	rcu:RCOM_1442280	heat shock 70kDa protein 1/8	GO:0009642//response to light intensity;GO:0051707//response to other organism;GO:0010038//response to metal ion;GO:0000302//response to reactive oxygen species;GO:0032446//protein modification by small protein conjugation	GO:0016628//oxidoreductase activity, acting on the CH-CH group of donors, NAD or NADP as acceptor;GO:0019899//enzyme binding;GO:0032559//adenyl ribonucleotide binding	GO:0043231//intracellular membrane-bounded organelle;GO:0030312//external encapsulating structure;GO:0016020//membrane
	Unigene6498	0	0	0	15.59	2.18	1.62	0	0	2.38	4.18	341	29	6.5398	gi|14423905|sp|Q9XGL4.1|RL31_CYAPA	108	1e-23	RecName: Full=60S ribosomal protein L31 >gi|5123727|emb|CAB45375.1| ribosomal protein L31 [Cyanophora paradoxa]	sp|Q7KF90|RL31_SPOFR	117	3e-29	60S ribosomal protein L31 OS=Spodoptera frugiperda GN=RpL31 PE=2 SV=1	SPAC890.08	84	2e-17	COG2097	Ribosomal protein L31E	K02910	3e-22	99.8	rcu:RCOM_1048250	large subUnit ribosomal protein L31e	GO:0006464//protein modification process;GO:0010467//gene expression;GO:0022613	GO:0004672//protein kinase activity;GO:0032559//adenyl ribonucleotide binding;GO:0005198//structural molecule activity	GO:0015934//large ribosomal subUnit
	Unigene65088	29.71	193.25	179.87	72.75	24.9	15.15	12.21	25.04	5	17.23	643	612	73.1915	gi|224114089|ref|XP_002316664.1|	284	5e-76	f-box family protein [Populus trichocarpa] >gi|222859729|gb|EEE97276.1| f-box family protein [Populus trichocarpa]	sp|Q570C0|TIR1_ARATH	215	2e-55	Protein TRANSPORT INHIBITOR RESPONSE 1 OS=Arabidopsis thaliana GN=TIR1 PE=1 SV=2	--	--	--	--	--	K13463	7e-33	137	ath:AT2G39940	coronatine-insensitive protein 1	GO:0009755//hormone-mediated signaling pathway	GO:0004871//signal transducer activity;GO:0043178//alcohol binding	-
	Unigene65261	9.52	178.88	240.69	100.29	27.13	9.02	27.52	11.03	6.3	16.31	652	771	90.9341	gi|256773105|dbj|BAI22477.1|	203	1e-51	delta 1-pyrroline-5-carboxylate synthase [Vigna unguiculata]	sp|Q96480|P5CS_SOLLC	167	7e-41	Delta-1-pyrroline-5-carboxylate synthase OS=Solanum lycopersicum GN=PRO2 PE=2 SV=1	L0117	65.5	7e-11	COG0263	Glutamate 5-kinase	K12657	3e-43	171	vvi:100232881	delta-1-pyrroline-5-carboxylate synthetase [EC:2.7.2.11 1.2.1.41]	GO:0006560//proline metabolic process	GO:0016620//oxidoreductase activity, acting on the aldehyde or oxo group of donors, NAD or NADP as acceptor;GO:0016646//oxidoreductase activity, acting on the CH-NH group of donors, NAD or NADP as acceptor;GO:0016774//phosphotransferase activity, carboxyl group as acceptor;GO:0032559//adenyl ribonucleotide binding	GO:0044424//intracellular part
	Unigene65262	1.71	5.58	6.25	2.99	0.86	0.56	0.57	1.31	2.89	7.9	652	38	4.4818	gi|208611514|gb|ABW75772.2|	179	2e-44	lipoxygenase [Camellia sinensis]	sp|Q06327|LOX1_ARATH	164	3e-40	Lipoxygenase 1 OS=Arabidopsis thaliana GN=LOX1 PE=1 SV=1	--	--	--	--	--	K00454	5e-44	174	osa:4338358	lipoxygenase [EC:1.13.11.12]	GO:0008610//lipid biosynthetic process	GO:0016491//oxidoreductase activity	-
	Unigene65339	25.72	202.36	216.95	121.56	68.4	3.92	17.38	6.53	2.64	5.97	656	846	99.1714	gi|297799236|ref|XP_002867502.1|	106	2e-22	glycosyltransferase family 14 protein [Arabidopsis lyrata subsp. lyrata] >gi|297313338|gb|EFH43761.1| glycosyltransferase family 14 protein [Arabidopsis lyrata subsp. lyrata]	--	--	--	--	--	--	--	--	--	--	--	--	--	--	GO:0005975//carbohydrate metabolic process	GO:0008194//UDP-glycosyltransferase activity	GO:0031224//intrinsic to membrane
	Unigene65366	55.97	140.33	117.62	80.1	34.01	4.48	36.69	35.98	2.01	4.29	657	761	89.0716	gi|224077516|ref|XP_002305282.1|	292	3e-78	4-coumarate-coa ligase [Populus trichocarpa] >gi|222848246|gb|EEE85793.1| 4-coumarate-coa ligase [Populus trichocarpa]	sp|Q9M0X9|4CLL7_ARATH	282	1e-75	4-coumarate--CoA ligase-like 7 OS=Arabidopsis thaliana GN=4CLL7 PE=1 SV=1	BH3104	108	6e-24	COG0318	Acyl-CoA synthetases (AMP-forming)/AMP-acid ligases II	K01904	1e-76	282	ath:AT4G05160	4-coumarate--CoA ligase [EC:6.2.1.12]	GO:0009694//jasmonic acid metabolic process;GO:0009850//auxin metabolic process	GO:0016703;GO:0016408	GO:0042579//microbody
	Unigene65432	36.42	94.79	108.85	55.58	29.62	8.08	15.86	9.6	2.37	5.3	660	608	70.8402	gi|28628306|gb|AAO38709.1|	220	1e-56	cation diffusion facilitator 10 [Stylosanthes hamata]	sp|Q9M2P2|MTPC3_ARATH	80.5	9e-15	Putative metal tolerance protein C3 OS=Arabidopsis thaliana GN=MTPC3 PE=3 SV=2	--	--	--	--	--	--	--	--	--	--	GO:0006811//ion transport	GO:0015075//ion transmembrane transporter activity	GO:0044464//cell part
	Unigene65488	100.7	298.32	216.39	271.67	52.71	28.79	124.68	35.08	2.1	4.59	664	1009	116.854	gi|5733089|gb|AAD49420.1|AF172681_1	325	4e-88	amine oxidase [Canavalia lineata]	sp|Q8H1H9|AMO_ARATH	224	4e-58	Primary amine oxidase OS=Arabidopsis thaliana GN=At1g62810 PE=2 SV=1	tynA	93.6	3e-19	COG3733	Cu2+-containing amine oxidase	K00276	2e-14	76.3	ppp:PHYPADRAFT_177807	primary-amine oxidase [EC:1.4.3.21]	GO:0006807//nitrogen compound metabolic process	GO:0046914//transition metal ion binding;GO:0016641//oxidoreductase activity, acting on the CH-NH2 group of donors, oxygen as acceptor;GO:0048037//cofactor binding	GO:0043231//intracellular membrane-bounded organelle
	Unigene6660	0	0	0	20.31	2.51	2.07	0	0	2.7	4.64	445	14	2.4193	gi|225435082|ref|XP_002284448.1|	129	1e-29	PREDICTED: similar to 60S ribosomal protein L23A isoform 2 [Vitis vinifera] >gi|225435084|ref|XP_002284445.1| PREDICTED: similar to 60S ribosomal protein L23A isoform 1 [Vitis vinifera]	sp|P62752|RL23A_RAT	136	5e-32	60S ribosomal protein L23a OS=Rattus norvegicus GN=Rpl23a PE=2 SV=1	SPBC4F6.04	108	3e-24	COG0089	Ribosomal protein L23	K02893	1e-30	129	osa:4336307	large subUnit ribosomal protein L23Ae	GO:0010467//gene expression	GO:0003723//RNA binding;GO:0005198//structural molecule activity	GO:0043231//intracellular membrane-bounded organelle;GO:0030529//ribonucleoprotein complex
	Unigene66678	1.73	17.4	32.03	51.93	0.76	5.49	0	0	6.16	14.06	737	156	16.2771	gi|62132635|gb|AAX69067.1|	347	6e-95	MADS box protein M5 [Pisum sativum]	sp|Q6EU39|MADS6_ORYSJ	276	8e-74	MADS-box transcription factor 6 OS=Oryza sativa subsp. japonica GN=MADS6 PE=1 SV=1	YPL089c	75.9	7e-14	COG5068	Regulator of arginine metabolism and related MADS box-containing transcription factors	K09264	3e-72	268	ath:AT2G45650	MADS-box transcription factor, plant	GO:0010468//regulation of gene expression;GO:0006351//transcription, DNA-dependent	GO:0003677//DNA binding;GO:0016628//oxidoreductase activity, acting on the CH-CH group of donors, NAD or NADP as acceptor	GO:0043231//intracellular membrane-bounded organelle
	Unigene66769	3.21	12.83	13.26	5.25	0.75	0	0.5	2.07	3.25	6.96	743	66	6.8309	gi|124359710|gb|ABN06064.1|	54.3	2e-13	RNA-directed DNA polymerase (Reverse transcriptase); Chromo; Zinc finger, CCHC-type; Peptidase aspartic, active site; Polynucleotidyl transferase, Ribonuclease H fold [Medicago truncatula]	--	--	--	--	--	--	--	--	--	--	--	--	--	--	GO:0006260//DNA replication;GO:0019538//protein metabolic process	GO:0003676//nucleic acid binding;GO:0004175//endopeptidase activity;GO:0034061	GO:0044464//cell part
	Unigene66777	9.42	39.37	31.96	22.86	10.01	1.48	3.52	11.51	2.73	5.49	744	278	28.7337	gi|224083155|ref|XP_002306955.1|	286	2e-76	calcium dependent protein kinase 27 [Populus trichocarpa] >gi|222856404|gb|EEE93951.1| calcium dependent protein kinase 27 [Populus trichocarpa]	sp|Q8RWL2|CDPKT_ARATH	281	3e-75	Calcium-dependent protein kinase 29 OS=Arabidopsis thaliana GN=CPK29 PE=2 SV=2	SPAC14C4.03	82.8	5e-16	COG0515	Serine/threonine protein kinase	K13412	3e-77	285	rcu:RCOM_1599390	calcium-dependent protein kinase [EC:2.7.11.1]	GO:0006464//protein modification process	GO:0046872//metal ion binding;GO:0004674//protein serine/threonine kinase activity;GO:0032559//adenyl ribonucleotide binding	GO:0016020//membrane
	Unigene66806	7.9	133.11	69.21	33.97	26.45	8.38	2.25	0	2.98	6.71	746	606	62.4675	gi|226510476|ref|NP_001147083.1|	233	1e-60	LOC100280692 [Zea mays] >gi|195607122|gb|ACG25391.1| aldehyde dehydrogenase 3B1 [Zea mays]	sp|Q70E96|AL3F1_ARATH	215	3e-55	Aldehyde dehydrogenase family 3 member F1 OS=Arabidopsis thaliana GN=ALDH3F1 PE=1 SV=2	alr3672	151	1e-36	COG1012	NAD-dependent aldehyde dehydrogenases	K00128	1e-47	186	osa:4349966	aldehyde dehydrogenase (NAD+) [EC:1.2.1.3]	GO:0044237//cellular metabolic process	GO:0016620//oxidoreductase activity, acting on the aldehyde or oxo group of donors, NAD or NADP as acceptor;GO:0005488//binding	-
	Unigene66813	29.24	78.52	58.96	38.72	10.23	13.31	6.01	0.92	2.01	4.36	746	341	35.1508	gi|224114195|ref|XP_002332424.1|	277	8e-74	cytokinin oxidase [Populus trichocarpa] >gi|222832377|gb|EEE70854.1| cytokinin oxidase [Populus trichocarpa]	sp|Q9LY71|CKX6_ARATH	265	2e-70	Cytokinin dehydrogenase 6 OS=Arabidopsis thaliana GN=CKX6 PE=2 SV=1	all0324	78.6	1e-14	COG0277	FAD/FMN-containing dehydrogenases	K00279	1e-68	256	ath:AT2G41510	cytokinin dehydrogenase [EC:1.5.99.12]	GO:0009690//cytokinin metabolic process;GO:0009888//tissue development	GO:0030554//adenyl nucleotide binding;GO:0016645//oxidoreductase activity, acting on the CH-NH group of donors	GO:0043231//intracellular membrane-bounded organelle
	Unigene6683	0	0	0.75	1.56	0	0	0	0	#DIV/0!	#DIV/0!	227	5	1.6938	gi|75335380|sp|Q9LRZ0.1|TPR2_ARATH	50.8	5e-08	RecName: Full=Topless-related protein 2	--	--	--	--	--	--	--	--	--	--	--	--	--	--	GO:0003006//reproductive developmental process	GO:0005488//binding	-
	Unigene66905	30.02	121.29	112.1	77.89	43.02	37.6	20.85	20.7	2.41	7.36	753	747	76.2861	gi|219816075|gb|ACL37155.1|	234	8e-61	short-chain alcohol dehydrogenase [Panax ginseng]	sp|Q9LBG2|LVR_LEIAQ	65.1	5e-10	Levodione reductase OS=Leifsonia aquatica GN=lvr PE=1 SV=1	BS_fabG	59.3	7e-09	COG1028	Dehydrogenases with different specificities (related to short-chain alcohol dehydrogenases)	K00059	2e-23	105	ath:AT1G63380	3-oxoacyl-[acyl-carrier protein] reductase [EC:1.1.1.100]	GO:0008152//metabolic process	GO:0016616//oxidoreductase activity, acting on the CH-OH group of donors, NAD or NADP as acceptor	GO:0042579//microbody
	Unigene67575	45.85	111.72	90.21	115.78	51.07	21.09	10.02	5.77	2.07	3.83	802	846	81.1178	gi|186511048|ref|NP_974431.2|	299	2e-80	transporter [Arabidopsis thaliana] >gi|7258348|emb|CAB77565.1| oligopeptide transporter-like protein [Arabidopsis thaliana]	sp|Q9LFB8|PTR5_ARATH	207	5e-53	Peptide transporter PTR5 OS=Arabidopsis thaliana GN=PTR5 PE=2 SV=1	ECU11g1050	99.4	6e-21	COG3104	Dipeptide/tripeptide permease	K03305	1e-55	213	pop:POPTR_805077	proton-dependent oligopeptide transporter, POT family	GO:0015833//peptide transport	-	GO:0031224//intrinsic to membrane
	Unigene67848	15.77	164.09	197.53	158.37	17.09	0.44	2.26	0.21	10.14	19.51	828	693	64.361	gi|108708521|gb|ABF96316.1|	251	6e-66	Serine carboxypeptidase family protein, expressed [Oryza sativa (japonica cultivar-group)]	sp|Q8S8K6|SCP28_ARATH	245	3e-64	Serine carboxypeptidase-like 28 OS=Arabidopsis thaliana GN=SCPL28 PE=2 SV=2	YBR139w	142	9e-34	COG2939	Carboxypeptidase C (cathepsin A)	K13289	3e-73	271	vvi:100248712	cathepsin A [EC:3.4.16.5]	GO:0019538//protein metabolic process	GO:0004180//carboxypeptidase activity	GO:0031410//cytoplasmic vesicle
	Unigene67886	18.94	48.12	51.44	37.91	11.19	5.08	8.09	10.91	2.42	6.78	832	571	52.7756	gi|17342714|gb|AAL35972.1|	491	1e-138	type IIA calcium ATPase [Medicago truncatula]	sp|Q42883|ECAP_SOLLC	434	4e-121	Calcium-transporting ATPase, endoplasmic reticulum-type OS=Solanum lycopersicum GN=LCA1 PE=2 SV=1	lin0832	169	4e-42	COG0474	Cation transport ATPase	K01537	1e-117	419	ath:AT4G00900	Ca2+-transporting ATPase [EC:3.6.3.8]	GO:0009206	GO:0019829//cation-transporting ATPase activity;GO:0016757//transferase activity, transferring glycosyl groups;GO:0032559//adenyl ribonucleotide binding	GO:0031224//intrinsic to membrane
	Unigene67984	16.64	115.47	132.52	48.19	8.4	25.76	1.11	0.81	3.83	8.25	842	399	36.4402	gi|22330132|ref|NP_175368.2|	326	2e-88	LACS2 (LONG-CHAIN ACYL-COA SYNTHETASE 2); long-chain-fatty-acid-CoA ligase [Arabidopsis thaliana] >gi|5430757|gb|AAD43157.1|AC007504_12 Putative acyl CoA synthetase [Arabidopsis thaliana] >gi|20805865|gb|AAM28869.1|AF503752_1 long chain acyl-CoA synthetase 2 [Arabidopsis thaliana] >gi|20453102|gb|AAM19793.1| At1g49430/F13F21_14 [Arabidopsis thaliana]	sp|Q55DR6|FCSA_DICDI	120	9e-27	Fatty acyl-CoA synthetase A OS=Dictyostelium discoideum GN=fcsA PE=1 SV=1	SPBP4H10.11c	93.2	5e-19	COG1022	Long-chain acyl-CoA synthetases (AMP-forming)	K01897	1e-89	326	ath:AT1G49430	long-chain acyl-CoA synthetase [EC:6.2.1.3]	GO:0006633//fatty acid biosynthetic process;GO:0006952//defense response;GO:0010102//lateral root morphogenesis	GO:0015645//fatty-acid ligase activity	-
	Unigene67996	36.26	102.17	93.08	94.8	34.67	17.45	25.71	43.68	2.21	6.42	843	861	78.5409	gi|223452393|gb|ACM89524.1|	404	1e-112	FERONIA receptor-like kinase [Glycine max]	sp|Q9SCZ4|FERON_ARATH	302	2e-81	Receptor-like protein kinase FERONIA OS=Arabidopsis thaliana GN=FER PE=1 SV=1	--	--	--	--	--	K04733	1e-47	186	ath:AT5G38990	interleukin-1 receptor-associated kinase 4 [EC:2.7.11.1]	GO:0006468//protein amino acid phosphorylation;GO:0009856//pollination;GO:0007275//multicellular organismal development	GO:0004871//signal transducer activity;GO:0004713//protein tyrosine kinase activity;GO:0032559//adenyl ribonucleotide binding	GO:0044426;GO:0031410//cytoplasmic vesicle;GO:0016020//membrane
	Unigene6810	96.68	345.81	439.71	342.27	149.63	36.09	98.13	108.71	2.51	6.84	219	20	7.0227	gi|115441449|ref|NP_001045004.1|	65.1	2e-10	Os01g0881900 [Oryza sativa Japonica Group] >gi|113534535|dbj|BAF06918.1| Os01g0881900 [Oryza sativa Japonica Group]	sp|O49286|FBL5_ARATH	62	1e-09	F-box/LRR-repeat protein 5 OS=Arabidopsis thaliana GN=FBL5 PE=2 SV=1	--	--	--	--	--	K03875	8e-11	62	ath:AT1G77000	F-box and leucine-rich repeat protein 1 (S-phase kinase-associated protein 2)	GO:0019941//modification-dependent protein catabolic process;GO:0009408//response to heat	-	-
	Unigene6819	0	5.76	5.64	1.31	0	0	0.69	0	6.14	13.28	271	4	1.135	gi|87162510|gb|ABD28305.1|	72.8	4e-28	RNA-directed DNA polymerase (Reverse transcriptase) [Medicago truncatula]	sp|P31843|RRPO_OENBE	43.1	1e-10	RNA-directed DNA polymerase homolog OS=Oenothera bertiana PE=4 SV=1	YGR109w-b_2	44.7	2e-09	COG2801	Transposase and inactivated derivatives	--	--	--	--	--	GO:0006260//DNA replication	GO:0046914//transition metal ion binding;GO:0003676//nucleic acid binding;GO:0034061	-
	Unigene6837	6.98	261.85	335.2	128.24	9.39	110.06	1.64	46.2	2.2	4.54	456	108	18.2129	gi|1705840|sp|P51081.1|CHSA_PEA	224	2e-58	RecName: Full=Chalcone synthase 1A; AltName: Full=Naringenin-chalcone synthase 1A >gi|510543|emb|CAA56316.1| naringenin-chalcone synthase [Pisum sativum]	sp|P51081|CHSA_PEA	224	1e-58	Chalcone synthase 1A OS=Pisum sativum GN=CHS-1A PE=3 SV=1	--	--	--	--	--	K00660	7e-55	209	pop:POPTR_814871	chalcone synthase [EC:2.3.1.74]	GO:0009699//phenylpropanoid biosynthetic process	GO:0016747//transferase activity, transferring acyl groups other than amino-acyl groups	-
	Unigene69049	0.99	10.95	14.08	11.02	4.05	0.19	0.97	2.66	2.97	6.56	965	119	9.4829	gi|124360405|gb|ABN08418.1|	640	0	Phospholipase D/Transphosphatidylase; C2 calcium/lipid-binding region, CaLB [Medicago truncatula]	sp|Q9C888|PLDE1_ARATH	447	5e-125	Phospholipase D epsilon OS=Arabidopsis thaliana GN=PLDEPSILON PE=2 SV=1	ECU11g1180	110	3e-24	COG1502	Phosphatidylserine/phosphatidylglycerophosphate/cardiolipin synthases and related enzymes	K01115	4e-126	447	ath:AT1G55180	phospholipase D [EC:3.1.4.4]	GO:0006650//glycerophospholipid metabolic process	GO:0046872//metal ion binding;GO:0004620//phospholipase activity	GO:0044464//cell part
	Unigene69303	46.92	156.85	162.37	78.24	35.53	28.83	26.32	34.22	2.82	12.31	1001	1446	111.085	gi|116265960|gb|ABJ91228.1|	374	1e-103	CBL-interacting protein kinase 22 [Populus trichocarpa]	sp|Q5W736|CIPKI_ORYSJ	350	9e-96	CBL-interacting protein kinase 18 OS=Oryza sativa subsp. japonica GN=CIPK18 PE=2 SV=1	SPAC17G8.14c_2	125	1e-28	COG0515	Serine/threonine protein kinase	K00924	5e-83	304	osa:4342410	[EC:2.7.1.-]	GO:0006464//protein modification process	GO:0004672//protein kinase activity;GO:0032559//adenyl ribonucleotide binding	-
	Unigene69460	15.83	64.69	60.09	26.77	11.25	16.48	13.11	2.17	3.06	6.72	1026	460	34.4771	gi|227343621|gb|ACP27630.1|	414	1e-115	short-chain dehydrogenase/reductase [Oncidium Gower Ramsey]	sp|Q7Z9I2|YCP9_SCHPO	107	1e-22	Uncharacterized oxidoreductase C663.09c OS=Schizosaccharomyces pombe GN=SPCC663.09c PE=2 SV=1	all1420	202	1e-51	COG1028	Dehydrogenases with different specificities (related to short-chain alcohol dehydrogenases)	K09841	2e-08	56.6	sbi:SORBI_01g003880	xanthoxin dehydrogenase [EC:1.1.1.288]	GO:0008152//metabolic process	GO:0003824//catalytic activity	-
	Unigene69558	0.61	9.63	11.06	18.84	1.07	0	0.18	0	12.31	27.65	1044	114	8.397	gi|130582|sp|P10978.1|POLX_TOBAC	149	4e-35	RecName: Full=Retrovirus-related Pol polyprotein from transposon TNT 1-94; Includes: RecName: Full=Protease; Includes: RecName: Full=Reverse transcriptase; Includes: RecName: Full=Endonuclease	sp|P10978|POLX_TOBAC	149	2e-35	Retrovirus-related Pol polyprotein from transposon TNT 1-94 OS=Nicotiana tabacum PE=2 SV=1	--	--	--	--	--	--	--	--	--	--	GO:0006259//DNA metabolic process	GO:0008233//peptidase activity;GO:0046914//transition metal ion binding;GO:0003676//nucleic acid binding;GO:0004518//nuclease activity;GO:0016779//nucleotidyltransferase activity	-
	Unigene6956	1.97	17.65	9.44	3.83	1.15	3.97	1.73	0	2.59	5.89	324	48	11.3924	gi|1621463|gb|AAB17192.1|	119	1e-26	laccase [Liriodendron tulipifera]	sp|Q9FJD5|LAC17_ARATH	114	2e-25	Laccase-17 OS=Arabidopsis thaliana GN=LAC17 PE=2 SV=1	PA2065	50.8	6e-07	COG2132	Putative multicopper oxidases	K00368	2e-12	67	osa:4324803	nitrite reductase (NO-forming) [EC:1.7.2.1]	GO:0009808//lignin metabolic process	GO:0046914//transition metal ion binding;GO:0016682//oxidoreductase activity, acting on diphenols and related substances as donors, oxygen as acceptor	GO:0005576//extracellular region
	Unigene6962	0	0	0	7.35	0.77	0.76	0	0	3.17	5.1	241	8	2.5527	gi|283139172|gb|ADB12591.1|	50.1	4e-07	glutamine synthetase II [Auxenochlorella protothecoides]	sp|Q04831|GLNA_PANAR	65.9	1e-14	Glutamine synthetase OS=Panulirus argus PE=2 SV=1	YPR035w	45.8	7e-07	COG0174	Glutamine synthetase	K01915	4e-06	46.2	ppp:PHYPADRAFT_146278	glutamine synthetase [EC:6.3.1.2]	GO:0006807//nitrogen compound metabolic process	GO:0016874//ligase activity;GO:0000166//nucleotide binding	-
	Unigene69832	1.31	48.97	45.52	16.31	3.05	0.34	2.9	1.25	12.09	30.09	1097	431	30.2128	gi|15229310|ref|NP_187101.1|	271	8e-72	LSH2 (LIGHT SENSITIVE HYPOCOTYLS 2) [Arabidopsis thaliana]	--	--	--	--	--	--	--	--	--	--	--	--	--	--	GO:0000902//cell morphogenesis;GO:0009639//response to red or far red light	-	GO:0009536//plastid
	Unigene6992	3.54	77.79	67.93	29.14	1.65	0	2.49	0.76	16.48	40.59	225	7	2.3924	gi|164604832|dbj|BAF98468.1|	91.7	2e-18	cytochrome P450 [Coptis japonica var. dissecta]	sp|O22307|C71DB_LOTJA	84	3e-16	Cytochrome P450 71D11 (Fragment) OS=Lotus japonicus GN=CYP71D11 PE=2 SV=1	--	--	--	--	--	K00517	3e-16	80.1	ath:AT1G11610	[EC:1.14.-.-]	GO:0051707//response to other organism;GO:0008152//metabolic process	GO:0016491//oxidoreductase activity;GO:0005506//iron ion binding	-
	Unigene7016	0	0	0	28.24	1.3	3.22	0	0	2.92	6.03	571	76	10.2352	gi|297792603|ref|XP_002864186.1|	261	4e-69	heat shock protein 81-1 [Arabidopsis lyrata subsp. lyrata] >gi|297310021|gb|EFH40445.1| heat shock protein 81-1 [Arabidopsis lyrata subsp. lyrata]	sp|P34058|HS90B_RAT	313	5e-85	Heat shock protein HSP 90-beta OS=Rattus norvegicus GN=Hsp90ab1 PE=1 SV=4	SPAC926.04c	212	4e-55	COG0326	Molecular chaperone, HSP90 family	K04079	2e-71	264	sbi:SORBI_02g028050	molecular chaperone HtpG	GO:0006952//defense response;GO:0010035//response to inorganic substance;GO:0044267//cellular protein metabolic process	GO:0005515//protein binding;GO:0032559//adenyl ribonucleotide binding	GO:0044444//cytoplasmic part;GO:0016020//membrane;GO:0030312//external encapsulating structure
	Unigene7025	0	0	0	15.51	1.25	2.48	0	0	2.09	3.99	297	9	2.3303	gi|53801490|gb|AAU93947.1|	51.2	4e-13	thioredoxin H [Helicosporidium sp. ex Simulium jonesi]	sp|Q6XHI1|THIO2_DROYA	55.1	2e-17	Thioredoxin-2 OS=Drosophila yakuba GN=Trx-2 PE=3 SV=1	SPAC7D4.07c	47	5e-11	COG0526	Thiol-disulfide isomerase and thioredoxins	K03671	7e-13	45.1	ppp:PHYPADRAFT_185663	thioredoxin 1	GO:0019725//cellular homeostasis	-	-
	Unigene7028	18.01	86.26	70.7	33.68	16.85	2.5	5.07	11.63	3.53	7.63	221	3	1.0439	gi|15232157|ref|NP_186814.1|	68.9	6e-22	RGLG1 (RING domain Ligase1); protein binding / zinc ion binding [Arabidopsis thaliana] >gi|75207472|sp|Q9SS90.1|RGLG1_ARATH RecName: Full=E3 ubiquitin-protein ligase RGLG1; AltName: Full=RING domain ligase 1	sp|Q9SS90|RGLG1_ARATH	68.9	3e-22	E3 ubiquitin-protein ligase RGLG1 OS=Arabidopsis thaliana GN=RGLG1 PE=1 SV=1	--	--	--	--	--	--	--	--	--	--	GO:0042445//hormone metabolic process;GO:0006725//cellular aromatic compound metabolic process	GO:0046914//transition metal ion binding	GO:0016020//membrane
	Unigene7106	0	0	0	6.88	0	0	0	0	#DIV/0!	#DIV/0!	206	1	0.3733	gi|159489856|ref|XP_001702907.1|	80.5	1e-23	outer dynein arm light chain 8 [Chlamydomonas reinhardtii] >gi|2494219|sp|Q39580.1|DYL1_CHLRE RecName: Full=Dynein 8 kDa light chain, flagellar outer arm >gi|755460|gb|AAA80586.1| 8 kDa outer arm dynein light chain [Chlamydomonas reinhardtii] >gi|74272647|gb|ABA01119.1| dynein light chain 8 kDa outer arm [Chlamydomonas incerta] >gi|158270930|gb|EDO96760.1| outer dynein arm light chain 8 [Chlamydo…	sp|Q24117|DYL1_DROME	82.8	6e-25	Dynein light chain 1, cytoplasmic OS=Drosophila melanogaster GN=ctp PE=1 SV=1	--	--	--	--	--	K10418	4e-25	80.5	cre:CHLREDRAFT_194837	dynein light chain LC8-type	GO:0009987//cellular process	GO:0003774//motor activity	GO:0005875//microtubule associated complex;GO:0005930//axoneme
	Unigene71095	20.66	53.74	46.29	29.17	10.3	8.04	20.81	8.42	2.07	4.51	1464	839	44.0698	gi|89329716|gb|ABD67495.1|	701	0	RAMOSUS4 [Pisum sativum]	sp|Q9SIM9|ORE9_ARATH	395	5e-109	F-box protein ORE9 OS=Arabidopsis thaliana GN=ORE9 PE=1 SV=2	--	--	--	--	--	--	--	--	--	--	GO:0032501//multicellular organismal process	-	-
	Unigene71099	31.3	85.41	91.7	74.15	28.85	6.02	14.8	15.08	2.68	6.09	1465	790	41.4677	gi|17342714|gb|AAL35972.1|	924	0	type IIA calcium ATPase [Medicago truncatula]	sp|Q42883|ECAP_SOLLC	776	0	Calcium-transporting ATPase, endoplasmic reticulum-type OS=Solanum lycopersicum GN=LCA1 PE=2 SV=1	MA4082	259	1e-68	COG0474	Cation transport ATPase	K01537	0	763	ath:AT4G00900	Ca2+-transporting ATPase [EC:3.6.3.8]	GO:0009206	GO:0043169//cation binding;GO:0019829//cation-transporting ATPase activity;GO:0016757//transferase activity, transferring glycosyl groups;GO:0032559//adenyl ribonucleotide binding	GO:0031227//intrinsic to endoplasmic reticulum membrane
	Unigene71157	21.26	224.83	128.92	166.62	34.86	42.81	15.43	54.83	3.16	8.75	1490	1676	86.4983	gi|28301753|gb|AAO38045.1|	959	0	auxin efflux carrier protein PIN1 [Pisum sativum]	sp|Q9C6B8|PINI_ARATH	684	0	Auxin efflux carrier component 1 OS=Arabidopsis thaliana GN=PIN1 PE=1 SV=1	mll1169	51.2	5e-06	COG0679	Predicted permeases	K13947	1e-148	523	osa:4326565	auxin efflux carrier family	GO:0003002;GO:0048364//root development;GO:0009965//leaf morphogenesis;GO:0009606//tropism;GO:0009755//hormone-mediated signaling pathway;GO:0009791//post-embryonic development;GO:0003006//reproductive developmental process;GO:0009639//response to red or far red light	GO:0005488//binding	GO:0031224//intrinsic to membrane;GO:0043234//protein complex;GO:0016323//basolateral plasma membrane;GO:0044424//intracellular part
	Unigene71176	7.74	46.07	98.89	88.66	36.22	4.16	9.21	0	2.15	4.65	1501	1082	55.4328	gi|74273645|gb|ABA01490.1|	786	0	3-ketoacyl-CoA synthase [Gossypium hirsutum]	sp|Q9XF43|KCS6_ARATH	746	0	3-ketoacyl-CoA synthase 6 OS=Arabidopsis thaliana GN=CUT1 PE=2 SV=1	DRA0326	82.4	2e-15	COG3424	Predicted naringenin-chalcone synthase	K00660	4e-08	56.6	rcu:RCOM_1020600	chalcone synthase [EC:2.3.1.74]	GO:0009314//response to radiation;GO:0006633//fatty acid biosynthetic process;GO:0000902//cell morphogenesis;GO:0007275//multicellular organismal development;GO:0003006//reproductive developmental process;GO:0006950//response to stress	GO:0004312//fatty-acid synthase activity	GO:0043231//intracellular membrane-bounded organelle
	Unigene7121	2.24	11.2	7.63	7.96	3.66	0	0.52	0.48	2.44	4.93	356	42	9.0723	gi|300150694|gb|EFJ17343.1|	211	2e-54	family 2 glycosyltransferase [Selaginella moellendorffii] >gi|300168818|gb|EFJ35421.1| family 2 glycosyltransferase [Selaginella moellendorffii]	sp|Q84ZN6|CESA8_ORYSJ	208	9e-54	Probable cellulose synthase A catalytic subUnit 8 [UDP-forming] OS=Oryza sativa subsp. japonica GN=CESA8 PE=2 SV=1	--	--	--	--	--	K10999	1e-55	211	sbi:SORBI_01g004210	cellulose synthase A [EC:2.4.1.12]	GO:0045229//external encapsulating structure organization;GO:0009250//glucan biosynthetic process	GO:0016759//cellulose synthase activity;GO:0046914//transition metal ion binding	GO:0031224//intrinsic to membrane
	Unigene71346	0.2	51.56	64.11	59.69	14.08	0.34	0	2.89	4.15	9.11	1600	505	24.2712	gi|158634900|gb|ABW76287.1|	908	0	beta-glucosidase G2 [Medicago truncatula]	sp|Q7XKV4|BGL12_ORYSJ	663	0	Beta-glucosidase 12 OS=Oryza sativa subsp. japonica GN=BGLU12 PE=2 SV=2	BH1923	332	9e-91	COG2723	Beta-glucosidase/6-phospho-beta-glucosidase/beta-galactosidase	K05350	0	687	vvi:100254458	beta-glucosidase [EC:3.2.1.21]	GO:0044238//primary metabolic process	GO:0016798//hydrolase activity, acting on glycosyl bonds;GO:0043167//ion binding	-
	Unigene71456	16.06	53.69	74.89	42.7	14.7	12.22	11.31	4.98	3.55	10.56	1685	1503	68.5929	gi|15220455|ref|NP_176918.1|	605	1e-172	leucine-rich repeat family protein [Arabidopsis thaliana] >gi|3176660|gb|AAC18784.1| Similar to ERECTA receptor protein kinase gb|U47029 from A. thaliana [Arabidopsis thaliana] >gi|224589465|gb|ACN59266.1| leucine-rich repeat receptor-like protein kinase [Arabidopsis thaliana]	sp|C0LGS3|Y4372_ARATH	248	1e-64	Probable LRR receptor-like serine/threonine-protein kinase At4g37250 OS=Arabidopsis thaliana GN=At4g37250 PE=2 SV=1	lin1934_1	78.2	4e-14	COG0515	Serine/threonine protein kinase	K13415	4e-41	166	ath:AT4G39400	protein brassinosteroid insensitive 1 [EC:2.7.10.1 2.7.11.1]	GO:0006464//protein modification process	GO:0004672//protein kinase activity;GO:0032559//adenyl ribonucleotide binding	GO:0005618//cell wall;GO:0009532//plastid stroma;GO:0016020//membrane
	Unigene71781	16.04	103.9	119.01	34.33	14.09	21.62	20.35	4.04	3.97	10.12	2075	1337	49.5488	gi|13925771|gb|AAK49438.1|	954	0	phytase [Glycine max] >gi|297718790|gb|ADI50286.1| phytase [Glycine max]	sp|Q9SFU3|PPA15_ARATH	871	0	Purple acid phosphatase 15 OS=Arabidopsis thaliana GN=PAP15 PE=1 SV=1	Rv2577	76.3	2e-13	COG1409	Predicted phosphohydrolases	--	--	--	--	--	GO:0032501//multicellular organismal process;GO:0009856//pollination	GO:0016791//phosphatase activity;GO:0043169//cation binding	GO:0044464//cell part
	Unigene71801	8.47	39.74	35.58	19.44	15.16	1.64	0.44	10.24	2.08	3.97	2124	607	21.9763	gi|297833532|ref|XP_002884648.1|	639	0	asparaginyl-tRNA synthetase 2 [Arabidopsis lyrata subsp. lyrata] >gi|297330488|gb|EFH60907.1| asparaginyl-tRNA synthetase 2 [Arabidopsis lyrata subsp. lyrata]	sp|Q9SW95|SYNC2_ARATH	622	3e-177	Asparaginyl-tRNA synthetase, cytoplasmic 2 OS=Arabidopsis thaliana GN=SYNC2 PE=2 SV=2	HI1302	320	5e-87	COG0017	Aspartyl/asparaginyl-tRNA synthetases	K01893	0	681	pop:POPTR_830596	asparaginyl-tRNA synthetase [EC:6.1.1.22]	GO:0006418//tRNA aminoacylation for protein translation	GO:0004812//aminoacyl-tRNA ligase activity;GO:0000166//nucleotide binding	-
	Unigene71864	41.1	92.29	106.88	63.74	17.19	26.76	35.17	0.23	2.13	3.95	2274	1710	57.8263	gi|225427157|ref|XP_002277547.1|	1221	0	PREDICTED: similar to P-glycoprotein [Vitis vinifera]	sp|Q8LPK2|AB2B_ARATH	1147	0	ABC transporter B family member 2 OS=Arabidopsis thaliana GN=ABCB2 PE=1 SV=2	SPCC663.03	396	1e-109	COG1132	ABC-type multidrug transport system, ATPase and permease components	K05658	0	654	ppp:PHYPADRAFT_59717	ATP-binding cassette, subfamily B (MDR/TAP), member 1	GO:0006810//transport	GO:0042626//ATPase activity, coupled to transmembrane movement of substances;GO:0000166//nucleotide binding	GO:0043231//intracellular membrane-bounded organelle;GO:0016020//membrane
	Unigene7207	0.67	5.1	1.43	10.42	1.56	1.54	0	0	3.61	6.28	238	6	1.9386	gi|255637081|gb|ACU18872.1|	50.8	1e-13	unknown [Glycine max]	--	--	--	--	--	--	--	--	--	--	--	--	--	--	GO:0010468//regulation of gene expression;GO:0006351//transcription, DNA-dependent	GO:0003677//DNA binding	GO:0043231//intracellular membrane-bounded organelle
	Unigene756	15.01	39.4	49.91	17.85	6.88	9.68	6.04	0	2.38	5.15	1082	302	21.4635	gi|20563|emb|CAA78386.1|	289	3e-88	protein 1 [PetUnia x hybrida]	sp|Q8GWP0|MYB39_ARATH	216	3e-55	Transcription factor MYB39 OS=Arabidopsis thaliana GN=MYB39 PE=2 SV=1	ECU11g1690	114	4e-25	COG5147	Myb superfamily proteins, including transcription factors and mRNA splicing factors	K09422	1e-84	275	ath:AT5G15310	myb proto-oncogene protein, plant	GO:0010038//response to metal ion;GO:0009725//response to hormone stimulus;GO:0010468//regulation of gene expression;GO:0032989//cellular component morphogenesis;GO:0006970//response to osmotic stress;GO:0006350//transcription	GO:0003676//nucleic acid binding	GO:0043231//intracellular membrane-bounded organelle
	Unigene7584	3.01	81.06	78.1	23.72	0.88	1.74	5.3	1.62	11.51	33.65	635	176	21.3137	gi|151934183|gb|ABS18429.1|	99.4	3e-20	WRKY29 [Glycine max]	sp|Q9ZQ70|WRKY3_ARATH	71.6	4e-12	Probable WRKY transcription factor 3 OS=Arabidopsis thaliana GN=WRKY3 PE=2 SV=1	--	--	--	--	--	K13424	5e-12	67.8	rcu:RCOM_0849600	WRKY transcription factor 33	GO:0010468//regulation of gene expression	GO:0003677//DNA binding	GO:0043231//intracellular membrane-bounded organelle
	Unigene7636	0	0	0	14.47	0	2.25	0	0	2.14	4.34	245	5	1.5694	gi|301090694|ref|XP_002895552.1|	65.9	9e-14	40S ribosomal protein S13 [Phytophthora infestans T30-4] >gi|262097837|gb|EEY55889.1| 40S ribosomal protein S13 [Phytophthora infestans T30-4]	sp|Q9DFR6|RS13_GILMI	73.2	9e-18	40S ribosomal protein S13 OS=Gillichthys mirabilis GN=rps13 PE=2 SV=3	YDR064w	54.3	1e-11	COG0184	Ribosomal protein S15P/S13E	K02953	1e-14	62.8	pop:POPTR_666912	small subUnit ribosomal protein S13e	GO:0033205//cytokinesis during cell cycle;GO:0009887//organ morphogenesis;GO:0010467//gene expression;GO:0000904//cell morphogenesis involved in differentiation	GO:0005198//structural molecule activity	GO:0015935//small ribosomal subUnit;GO:0031981//nuclear lumen
	Unigene7643	3.37	21.2	55.15	53.37	8.32	8.22	0	0.4	5.19	9.66	425	76	13.7513	gi|224103297|ref|XP_002313000.1|	68.6	2e-11	SAUR family protein [Populus trichocarpa] >gi|222849408|gb|EEE86955.1| SAUR family protein [Populus trichocarpa]	sp|P33079|A10A5_SOYBN	62	1e-09	Auxin-induced protein 10A5 OS=Glycine max PE=2 SV=1	--	--	--	--	--	--	--	--	--	--	GO:0009725//response to hormone stimulus	-	-
	Unigene7752	4.25	12.45	16.74	9.1	0.38	0.38	2.3	0.35	3	6.48	487	79	12.4744	gi|297853226|ref|XP_002894494.1|	138	3e-32	kinase family protein [Arabidopsis lyrata subsp. lyrata] >gi|297340336|gb|EFH70753.1| kinase family protein [Arabidopsis lyrata subsp. lyrata]	--	--	--	--	--	--	--	--	--	--	--	--	--	--	GO:0006464//protein modification process	GO:0004871//signal transducer activity;GO:0004713//protein tyrosine kinase activity;GO:0032559//adenyl ribonucleotide binding	GO:0016020//membrane
	Unigene7945	10.17	39.39	47.42	12.47	12.29	15.32	2.22	15.2	2.16	4.1	924	321	26.7149	gi|115442307|ref|NP_001045433.1|	273	3e-72	Os01g0954500 [Oryza sativa Japonica Group] >gi|113534964|dbj|BAF07347.1| Os01g0954500 [Oryza sativa Japonica Group]	--	--	--	--	--	--	--	--	--	--	--	--	--	--	GO:0048513//organ development;GO:0009725//response to hormone stimulus	GO:0042802//identical protein binding	GO:0043231//intracellular membrane-bounded organelle
	Unigene8033	26.98	293.14	289.58	150.17	30.29	2.49	65.88	9.87	3.71	8.84	295	120	31.2809	gi|68131809|gb|AAY85183.1|	135	1e-31	tyrosine aminotransferase [Medicago truncatula]	sp|P04694|ATTY_RAT	58.5	1e-08	Tyrosine aminotransferase OS=Rattus norvegicus GN=Tat PE=1 SV=1	--	--	--	--	--	K00815	7e-28	118	pop:POPTR_568851	tyrosine aminotransferase [EC:2.6.1.5]	GO:0042360//vitamin E metabolic process	GO:0016846//carbon-sulfur lyase activity;GO:0070547;GO:0048037//cofactor binding	-
	Unigene8133	1.11	200.98	302.52	81.22	12.28	0.64	0.65	34.49	5.65	12.63	288	33	8.8113	gi|224093826|ref|XP_002310008.1|	114	3e-25	cytochrome P450 [Populus trichocarpa] >gi|222852911|gb|EEE90458.1| cytochrome P450 [Populus trichocarpa]	sp|Q9LTM1|C71BM_ARATH	92	1e-18	Cytochrome P450 71B22 OS=Arabidopsis thaliana GN=CYP71B22 PE=2 SV=1	--	--	--	--	--	K00517	7e-20	92	ath:AT3G26200	[EC:1.14.-.-]	GO:0008152//metabolic process	GO:0005506//iron ion binding;GO:0004497//monooxygenase activity	-
	Unigene8257	0.16	9.43	8.02	8.73	1.15	0	0	0.7	7.61	16.44	974	78	6.1582	gi|149727839|gb|ABR28334.1|	310	2e-83	MYB transcription factor MYB39 [Medicago truncatula]	sp|Q9LK95|MYB21_ARATH	148	6e-35	Transcription factor MYB21 OS=Arabidopsis thaliana GN=MYB21 PE=1 SV=1	ECU11g1690	86.3	7e-17	COG5147	Myb superfamily proteins, including transcription factors and mRNA splicing factors	K09422	7e-63	237	ath:AT3G06490	myb proto-oncogene protein, plant	GO:0010468//regulation of gene expression;GO:0009725//response to hormone stimulus;GO:0006970//response to osmotic stress;GO:0051707//response to other organism	-	-
	Unigene8305	0	0	0	36.18	3.1	2.3	0	0	3.89	7.29	240	19	6.0878	gi|224009171|ref|XP_002293544.1|	84	5e-16	RS8, ribosomal protein 8 [Thalassiosira pseudonana CCMP1335] >gi|220970944|gb|EED89280.1| RS8, ribosomal protein 8 [Thalassiosira pseudonana CCMP1335]	sp|P62243|RS8_RAT	103	2e-22	40S ribosomal protein S8 OS=Rattus norvegicus GN=Rps8 PE=1 SV=2	YER102w	87.4	6e-18	COG2007	Ribosomal protein S8E	K02995	5e-16	79.3	cme:CMT159C	small subUnit ribosomal protein S8e	GO:0010467//gene expression	GO:0005198//structural molecule activity	GO:0030529//ribonucleoprotein complex
	Unigene8308	4.96	13.33	18.01	18.79	3.48	0.38	3.11	2.14	3.37	8.18	481	46	7.3542	gi|297596518|ref|NP_001042692.2|	118	3e-42	Os01g0268500 [Oryza sativa Japonica Group] >gi|56783732|dbj|BAD81144.1| alpha-glucosidase -like [Oryza sativa Japonica Group] >gi|56783753|dbj|BAD81165.1| alpha-glucosidase -like [Oryza sativa Japonica Group] >gi|255673100|dbj|BAF04606.2| Os01g0268500 [Oryza sativa Japonica Group]	sp|P32138|YIHQ_ECOLI	57.8	3e-08	Alpha-glucosidase yihQ OS=Escherichia coli (strain K12) GN=yihQ PE=3 SV=3	STM4019	58.9	4e-09	COG1501	Alpha-glucosidases, family 31 of glycosyl hydrolases	K01811	1e-34	110	ppp:PHYPADRAFT_122818	putative family 31 glucosidase	GO:0044238//primary metabolic process	GO:0005488//binding;GO:0015926//glucosidase activity	GO:0043231//intracellular membrane-bounded organelle
	Unigene8389	6.12	24.66	28.52	14.31	8.12	2.83	2.16	5.05	2.77	7.25	780	199	19.6191	gi|81250789|gb|ABB69784.1|	331	5e-90	beta-glucan-binding protein 4 [Medicago truncatula]	sp|P21260|YPRO_OWEFU	84.7	6e-16	Uncharacterized proline-rich protein (Fragment) OS=Owenia fusiformis PE=4 SV=1	CC3494_1	77.4	2e-14	COG3637	Opacity protein and related surface antigens	K11671	3e-12	68.9	ppp:PHYPADRAFT_164383	nuclear factor related to kappa-B-binding protein	GO:0009056//catabolic process	GO:0004553//hydrolase activity, hydrolyzing O-glycosyl compounds;GO:0004871//signal transducer activity	-
	Unigene8422	1.99	6.85	11.3	6.26	0.39	0	1.17	1.07	4.1	9.41	481	20	3.1975	gi|5814093|gb|AAD52097.1|AF088885_1	166	1e-40	receptor-like kinase CHRK1 [Nicotiana tabacum]	sp|Q9WTV1|CH3L1_RAT	57.8	3e-08	Chitinase-3-like protein 1 OS=Rattus norvegicus GN=Chi3l1 PE=2 SV=3	--	--	--	--	--	--	--	--	--	--	GO:0005975//carbohydrate metabolic process;GO:0043170	GO:0004553//hydrolase activity, hydrolyzing O-glycosyl compounds;GO:0005488//binding;GO:0004672//protein kinase activity	GO:0030312//external encapsulating structure
	Unigene8588	14.8	44.45	45.46	36.23	12.46	20.5	10.42	15.92	2.05	7.12	269	51	14.5793	gi|40457263|gb|AAR86687.1|	167	4e-41	glycerol kinase [Glycine max]	sp|Q9WU65|GLPK2_MOUSE	89	8e-18	Glycerol kinase 2 OS=Mus musculus GN=Gk2 PE=2 SV=1	mll0700	75.9	2e-14	COG0554	Glycerol kinase	K00864	1e-39	157	vvi:100251587	glycerol kinase [EC:2.7.1.30]	GO:0006071//glycerol metabolic process;GO:0009636//response to toxin;GO:0051707//response to other organism	GO:0016301//kinase activity	-
	Unigene8660	8.93	45.54	96.62	16.27	10.92	9.38	0.48	0.44	4.83	9.1	392	96	18.8324	gi|133874174|dbj|BAF49290.1|	243	4e-64	chalcone synthase [Clitoria ternatea]	sp|P51082|CHSB_PEA	243	3e-64	Chalcone synthase 1B OS=Pisum sativum GN=CHS-1B PE=3 SV=1	--	--	--	--	--	K00660	1e-63	238	pop:POPTR_814871	chalcone synthase [EC:2.3.1.74]	GO:0009699//phenylpropanoid biosynthetic process	GO:0016747//transferase activity, transferring acyl groups other than amino-acyl groups	-
	Unigene8921	26.59	118.31	72.69	61.41	40.42	23.41	11.31	25.03	2.08	5.67	479	88	14.1276	gi|18402674|ref|NP_566665.1|	130	6e-30	plastocyanin-like domain-containing protein [Arabidopsis thaliana] >gi|32815931|gb|AAP88350.1| At3g20570 [Arabidopsis thaliana]	sp|Q9T076|ENL2_ARATH	96.7	6e-20	Early nodulin-like protein 2 OS=Arabidopsis thaliana GN=At4g27520 PE=1 SV=1	--	--	--	--	--	--	--	--	--	--	GO:0006091//generation of precursor metabolites and energy	GO:0046914//transition metal ion binding	GO:0031410//cytoplasmic vesicle
	Unigene8956	5.97	66.57	15.75	20.53	1.98	0.52	17.04	0.16	2.01	4.14	3202	899	21.5903	gi|24899168|dbj|BAC23098.1|	1827	0	phototropin [Vicia faba]	sp|O48963|PHOT1_ARATH	1326	0	Phototropin-1 OS=Arabidopsis thaliana GN=PHOT1 PE=1 SV=1	SPAC17G8.14c_2	177	8e-44	COG0515	Serine/threonine protein kinase	K08282	0	1326	ath:AT3G45780	non-specific serine/threonine protein kinase [EC:2.7.11.1]	GO:0006351//transcription, DNA-dependent;GO:0015992//proton transport;GO:0010360;GO:0009902//chloroplast relocation;GO:0010118//stomatal movement;GO:0006468//protein amino acid phosphorylation;GO:0009606//tropism;GO:0009416//response to light stimulus	GO:0004673//protein histidine kinase activity;GO:0005515//protein binding;GO:0004674//protein serine/threonine kinase activity;GO:0032559//adenyl ribonucleotide binding;GO:0009881//photoreceptor activity	GO:0043231//intracellular membrane-bounded organelle;GO:0044459//plasma membrane part
	Unigene9127	4.08	67.29	70.92	16.88	0.68	2.69	2.05	0.63	12.66	34.2	273	58	16.3375	gi|224131142|ref|XP_002321011.1|	92	2e-18	multidrug resistance protein ABC transporter family [Populus trichocarpa] >gi|222861784|gb|EEE99326.1| multidrug resistance protein ABC transporter family [Populus trichocarpa]	sp|Q9LZJ5|AB14C_ARATH	79.7	5e-15	ABC transporter C family member 14 OS=Arabidopsis thaliana GN=ABCC14 PE=1 SV=1	--	--	--	--	--	--	--	--	--	--	GO:0009987//cellular process;GO:0006810//transport;GO:0051707//response to other organism;GO:0042221//response to chemical stimulus;GO:0006950//response to stress	GO:0017111//nucleoside-triphosphatase activity;GO:0051183//vitamin transporter activity;GO:0016491//oxidoreductase activity;GO:0000166//nucleotide binding	GO:0031090//organelle membrane;GO:0005773//vacuole
	Unigene9147	4.37	54.24	45.38	25.7	15.63	2.25	1.71	8.37	2.67	6.14	655	296	34.7513	gi|15219457|ref|NP_177480.1|	363	1e-99	SUS6 (SUCROSE SYNTHASE 6); UDP-glycosyltransferase/ sucrose synthase [Arabidopsis thaliana]	sp|Q00917|SUS2_ARATH	325	2e-88	Sucrose synthase 2 OS=Arabidopsis thaliana GN=At5g49190 PE=2 SV=2	all1059	216	3e-56	COG0438	Glycosyltransferase	K00695	3e-98	354	osa:4331252	sucrose synthase [EC:2.4.1.13]	GO:0005984//disaccharide metabolic process	GO:0035251//UDP-glucosyltransferase activity	GO:0030312//external encapsulating structure
	Unigene9182	1.47	13.45	14.13	9.5	2.75	0.68	0.69	2.22	4.49	11.72	541	41	5.8278	gi|212960446|gb|ACJ38667.1|	233	1e-64	cellulose synthase [Betula luminifera]	sp|Q6YVM4|CESA6_ORYSJ	231	6e-63	Probable cellulose synthase A catalytic subUnit 6 [UDP-forming] OS=Oryza sativa subsp. japonica GN=CESA6 PE=2 SV=1	aq_1407	52.8	3e-07	COG1215	Glycosyltransferases, probably involved in cell wall biogenesis	K10999	7e-65	231	vvi:100242715	cellulose synthase A [EC:2.4.1.12]	GO:0045229//external encapsulating structure organization;GO:0009250//glucan biosynthetic process	GO:0016759//cellulose synthase activity;GO:0046914//transition metal ion binding	GO:0031224//intrinsic to membrane
	Unigene9278	1.86	77.53	9.93	0.52	1.63	0	0.55	0	15.75	32.06	342	71	15.9644	gi|21553402|gb|AAM62495.1|	129	2e-30	protein kinase [Arabidopsis thaliana]	--	--	--	--	--	--	--	--	--	--	--	--	--	--	GO:0006464//protein modification process	GO:0004713//protein tyrosine kinase activity;GO:0032559//adenyl ribonucleotide binding	GO:0016020//membrane
	Unigene9309	4.92	30.37	15.76	7.31	1.44	7.11	1.44	0.44	2.51	5.22	388	49	9.7115	gi|1621463|gb|AAB17192.1|	186	5e-47	laccase [Liriodendron tulipifera]	sp|Q9FJD5|LAC17_ARATH	181	1e-45	Laccase-17 OS=Arabidopsis thaliana GN=LAC17 PE=2 SV=1	SPAC1F7.08	57.8	5e-09	COG2132	Putative multicopper oxidases	K00423	2e-15	77.4	ath:AT5G21100	L-ascorbate oxidase [EC:1.10.3.3]	GO:0009808//lignin metabolic process	GO:0046914//transition metal ion binding;GO:0016682//oxidoreductase activity, acting on diphenols and related substances as donors, oxygen as acceptor	GO:0005576//extracellular region
	Unigene997	1.94	7.37	6.71	3.23	1.13	0	1.7	1.04	2.98	6.14	329	40	9.3494	gi|156153085|gb|ABU54776.1|	113	2e-37	phospholipase D alpha 1 precursor [Helianthus annuus]	sp|Q41142|PLDA1_RICCO	110	7e-37	Phospholipase D alpha 1 OS=Ricinus commUnis GN=PLD1 PE=1 SV=1	--	--	--	--	--	K01115	1e-38	115	vvi:100232987	phospholipase D [EC:3.1.4.4]	GO:0006650//glycerophospholipid metabolic process	GO:0046872//metal ion binding;GO:0004620//phospholipase activity	GO:0043231//intracellular membrane-bounded organelle;GO:0016020//membrane
	Unigene9995	0.4	67.49	85.77	16.03	0.94	1.85	0.47	0.43	30.54	90.21	398	102	19.7078	gi|115456515|ref|NP_001051858.1|	186	7e-47	Os03g0842700 [Oryza sativa Japonica Group] >gi|108712031|gb|ABF99826.1| Vacuolar sorting protein 9 domain containing protein, expressed [Oryza sativa (japonica cultivar-group)] >gi|113550329|dbj|BAF13772.1| Os03g0842700 [Oryza sativa Japonica Group]	sp|O74396|VPS91_SCHPO	88.2	1e-17	Vacuolar protein sorting-associated protein 9a OS=Schizosaccharomyces pombe GN=vps901 PE=2 SV=1	--	--	--	--	--	--	--	--	--	--	GO:0051234//establishment of localization;GO:0000911//cytokinesis by cell plate formation;GO:0009791//post-embryonic development	GO:0005088//Ras guanyl-nucleotide exchange factor activity	GO:0043231//intracellular membrane-bounded organelle;GO:0044444//cytoplasmic part
Stamens	Unigene10012	0.25	1.07	0	6.28	32.99	0.85	0	0	5.25	13.94	649	36	4.2656	gi|162568623|gb|ABY19373.1|	119	4e-26	major intrinsic protein NIP5;1 [Lotus japonicus]	sp|Q0IWF3|NIP31_ORYSJ	112	3e-24	Aquaporin NIP3-1 OS=Oryza sativa subsp. japonica GN=NIP3-1 PE=2 SV=2	--	--	--	--	--	K09874	2e-25	112	osa:4349102	aquaporin NIP	GO:0015698//inorganic anion transport;GO:0010036//response to boron	GO:0015563;GO:0005372//water transporter activity;GO:0015103//inorganic anion transmembrane transporter activity	GO:0044459//plasma membrane part;GO:0043231//intracellular membrane-bounded organelle;GO:0031224//intrinsic to membrane
	Unigene10187	5.35	3.77	5.71	16.11	37.16	2.18	0.74	1.69	2.31	6.16	506	49	7.4467	gi|223452375|gb|ACM89515.1|	196	8e-50	cysteine-rich receptor-like protein kinase [Glycine max]	sp|Q8GYA4|CRK10_ARATH	184	2e-46	Cysteine-rich receptor-like protein kinase 10 OS=Arabidopsis thaliana GN=CRK10 PE=1 SV=2	YAR019c	65.5	4e-11	COG0515	Serine/threonine protein kinase	K13430	8e-30	126	zma:100283091	serine/threonine-protein kinase PBS1 [EC:2.7.11.1]	GO:0006464//protein modification process	GO:0004702//receptor signaling protein serine/threonine kinase activity;GO:0004713//protein tyrosine kinase activity;GO:0032559//adenyl ribonucleotide binding	-
	Unigene10202	0.68	0	0	0.75	10.3	2.35	0	0.73	4.39	11.59	235	12	3.9268	gi|18400827|ref|NP_565595.1|	87	6e-17	epsin N-terminal homology (ENTH) domain-containing protein [Arabidopsis thaliana] >gi|46395898|sp|Q8LF20.2|CAP2_ARATH RecName: Full=Putative clathrin assembly protein At2g25430 >gi|4432855|gb|AAD20703.1| expressed protein [Arabidopsis thaliana] >gi|22654977|gb|AAM98081.1| At2g25430/F13B15.9 [Arabidopsis thaliana] >gi|30725272|gb|AAP37658.1| At2g25430/F13B15.9 [Arabidopsis thaliana]	sp|Q8S9J8|CAP1_ARATH	82	1e-15	Probable clathrin assembly protein At4g32285 OS=Arabidopsis thaliana GN=At4g32285 PE=1 SV=1	--	--	--	--	--	--	--	--	--	--	GO:0006901//vesicle coating	GO:0035091//phosphoinositide binding;GO:0005515//protein binding	GO:0030117//membrane coat;GO:0043231//intracellular membrane-bounded organelle
	Unigene10208	0	0	0	5.77	15.42	0	0	0	2.67	6.7	338	21	4.7777	gi|12229638|sp|O64806.2|ACA7_ARATH	190	5e-48	RecName: Full=Putative calcium-transporting ATPase 7, plasma membrane-type; AltName: Full=Ca(2+)-ATPase isoform 7	sp|O81108|ACA2_ARATH	187	1e-47	Calcium-transporting ATPase 2, plasma membrane-type OS=Arabidopsis thaliana GN=ACA2 PE=1 SV=1	UU264	56.2	1e-08	COG0474	Cation transport ATPase	K01537	2e-49	190	ath:AT2G22950	Ca2+-transporting ATPase [EC:3.6.3.8]	GO:0009206	GO:0046873//metal ion transmembrane transporter activity;GO:0019829//cation-transporting ATPase activity;GO:0005515//protein binding;GO:0032559//adenyl ribonucleotide binding	GO:0031224//intrinsic to membrane;GO:0043231//intracellular membrane-bounded organelle;GO:0031410//cytoplasmic vesicle;GO:0031090//organelle membrane
	Unigene10256	0.47	0	0	1.05	22.72	0	0	0	21.54	55.02	336	14	3.2041	gi|3015488|gb|AAC12254.1|	85.1	1e-27	receptor-like protein kinase [Solanum lycopersicum]	sp|C0LGR9|Y4312_ARATH	81.6	1e-27	Probable LRR receptor-like serine/threonine-protein kinase At4g31250 OS=Arabidopsis thaliana GN=At4g31250 PE=2 SV=1	--	--	--	--	--	K00558	1e-06	48.1	osa:4332128	DNA (cytosine-5-)-methyltransferase [EC:2.1.1.37]	GO:0006464//protein modification process;GO:0007167//enzyme linked receptor protein signaling pathway	GO:0016301//kinase activity;GO:0016628//oxidoreductase activity, acting on the CH-CH group of donors, NAD or NADP as acceptor;GO:0032559//adenyl ribonucleotide binding	GO:0043231//intracellular membrane-bounded organelle;GO:0031224//intrinsic to membrane;GO:0031410//cytoplasmic vesicle
	Unigene10417	10.58	0	0.56	1.47	29.07	3.66	0	0	2.75	6.91	602	33	4.2154	gi|132424661|gb|ABO33483.1|	246	3e-81	class I KNOX homeobox transcription factor [Medicago truncatula]	sp|P46608|HSBH1_SOYBN	188	6e-59	Homeobox protein SBH1 OS=Glycine max GN=H1 PE=2 SV=1	--	--	--	--	--	--	--	--	--	--	GO:0010468//regulation of gene expression;GO:0006351//transcription, DNA-dependent	GO:0003677//DNA binding	GO:0043231//intracellular membrane-bounded organelle
	Unigene10541	0	0.64	0	10.42	23.96	0	0	0	2.3	5.73	272	7	1.979	gi|224096008|ref|XP_002310518.1|	112	1e-24	cation proton exchanger [Populus trichocarpa] >gi|222853421|gb|EEE90968.1| cation proton exchanger [Populus trichocarpa]	sp|O22920|CHX13_ARATH	56.2	6e-08	K(+)/H(+) antiporter 13 OS=Arabidopsis thaliana GN=CHX13 PE=1 SV=1	--	--	--	--	--	--	--	--	--	--	GO:0006811//ion transport	GO:0015298//solute:cation antiporter activity;GO:0015078//hydrogen ion transmembrane transporter activity	GO:0016020//membrane
	Unigene10562	0.72	0.93	1.37	30.73	126.46	0.99	0	0.92	4.12	10.73	1113	345	23.8366	gi|297796723|ref|XP_002866246.1|	305	9e-82	glycerophosphoryl diester phosphodiesterase family protein [Arabidopsis lyrata subsp. lyrata] >gi|297312081|gb|EFH42505.1| glycerophosphoryl diester phosphodiesterase family protein [Arabidopsis lyrata subsp. lyrata]	sp|Q9SZ11|GLPQ2_ARATH	195	4e-49	Probable glycerophosphoryl diester phosphodiesterase 2 OS=Arabidopsis thaliana GN=GPDL2 PE=1 SV=2	--	--	--	--	--	K01126	1e-08	57.8	osa:4333407	glycerophosphoryl diester phosphodiesterase [EC:3.1.4.46]	GO:0044238//primary metabolic process	GO:0008081//phosphoric diester hydrolase activity	GO:0031224//intrinsic to membrane
	Unigene10615	0	0.25	0.5	6.72	24.43	0	0	0	3.64	9.35	686	48	5.3807	gi|87162536|gb|ABD28331.1|	291	4e-78	Phosphatidylinositol-4-phosphate 5-kinase [Medicago truncatula]	sp|Q9SLG9|PI5K5_ARATH	284	4e-76	Phosphatidylinositol-4-phosphate 5-kinase 5 OS=Arabidopsis thaliana GN=PIP5K5 PE=2 SV=1	slr1485	96.3	4e-20	COG4642	Uncharacterized protein conserved in bacteria	K00889	4e-77	284	ath:AT2G41210	1-phosphatidylinositol-4-phosphate 5-kinase [EC:2.7.1.68]	GO:0016192//vesicle-mediated transport;GO:0009856//pollination;GO:0030384//phosphoinositide metabolic process;GO:0009664//plant-type cell wall organization;GO:0000904//cell morphogenesis involved in differentiation	GO:0016307//phosphatidylinositol phosphate kinase activity	GO:0044459//plasma membrane part;GO:0044444//cytoplasmic part
	Unigene10623	7.56	5.2	2.55	9.75	40.96	4.14	18.69	1.28	2.19	5.76	400	72	13.8418	gi|1928882|gb|AAB51381.1|	194	2e-49	dehydrin 3 [Pisum sativum]	sp|P28639|DHN1_PEA	192	4e-49	Dehydrin DHN1 OS=Pisum sativum GN=DHN1 PE=2 SV=1	--	--	--	--	--	K12741	1e-06	48.5	rcu:RCOM_0655610	heterogeneous nuclear ribonucleoprotein A1/A3	GO:0006950//response to stress;GO:0042221//response to chemical stimulus;GO:0009628//response to abiotic stimulus	-	-
	Unigene10629	0	0	0.53	11.14	45.67	0	0	0	4.1	10.52	318	30	7.2546	gi|224126915|ref|XP_002319958.1|	87.4	4e-17	cation proton exchanger [Populus trichocarpa] >gi|222858334|gb|EEE95881.1| cation proton exchanger [Populus trichocarpa]	sp|O22920|CHX13_ARATH	76.3	5e-14	K(+)/H(+) antiporter 13 OS=Arabidopsis thaliana GN=CHX13 PE=1 SV=1	--	--	--	--	--	--	--	--	--	--	GO:0050896//response to stimulus;GO:0030001//metal ion transport	GO:0046873//metal ion transmembrane transporter activity;GO:0015298//solute:cation antiporter activity;GO:0015078//hydrogen ion transmembrane transporter activity	GO:0031224//intrinsic to membrane
	Unigene1085	0.34	1.23	1.2	16.33	42.09	1.69	0.13	0.24	2.58	6.63	1411	273	14.8784	gi|15217591|ref|NP_171702.1|	660	0	GAE2 (UDP-D-GLUCURONATE 4-EPIMERASE 2); UDP-glucuronate 4-epimerase/ catalytic [Arabidopsis thaliana] >gi|75264107|sp|Q9LPC1.1|GAE2_ARATH RecName: Full=UDP-glucuronate 4-epimerase 2; AltName: Full=UDP-glucuronic acid epimerase 2 >gi|8570451|gb|AAF76478.1|AC020622_12 Contains similarity to CAPI protein from Staphylococcus aureus gi|P39858 and contains a NAD dependent epimerase/dehydratase PF|01370…	sp|Q9LPC1|GAE2_ARATH	660	0	UDP-glucuronate 4-epimerase 2 OS=Arabidopsis thaliana GN=GAE2 PE=2 SV=1	BH3709	280	3e-75	COG0451	Nucleoside-diphosphate-sugar epimerases	K08679	0	661	vvi:100247175	UDP-glucuronate 4-epimerase [EC:5.1.3.6]	GO:0006139//nucleobase, nucleoside, nucleotide and nucleic acid metabolic process	GO:0048037//cofactor binding;GO:0016857//racemase and epimerase activity, acting on carbohydrates and derivatives	GO:0044464//cell part
	Unigene1179	0.65	0.24	0	6.77	34.8	0.75	0	0.47	5.14	13.72	733	36	3.7768	gi|220966833|gb|ACL97384.1|	260	1e-111	Gag-Pol polyprotein [Medicago truncatula]	sp|P10978|POLX_TOBAC	202	3e-76	Retrovirus-related Pol polyprotein from transposon TNT 1-94 OS=Nicotiana tabacum PE=2 SV=1	--	--	--	--	--	--	--	--	--	--	GO:0006259//DNA metabolic process;GO:0006950//response to stress	GO:0004175//endopeptidase activity;GO:0046914//transition metal ion binding;GO:0003676//nucleic acid binding;GO:0004518//nuclease activity;GO:0034061;GO:0000166//nucleotide binding	-
	Unigene11896	6.48	8.41	8.51	19.13	39.33	3.16	9.36	1.07	2.06	5.43	639	129	15.5242	gi|144905170|dbj|BAF56238.1|	124	9e-39	cytochrome P450 enzyme [Pisum sativum]	sp|Q42569|C90A1_ARATH	103	2e-27	Cytochrome P450 90A1 OS=Arabidopsis thaliana GN=CYP90A1 PE=2 SV=1	--	--	--	--	--	K12637	7e-14	73.9	ath:AT4G36380	cytochrome P450, family 90, subfamily C, polypeptide 1 [EC:1.14.-.-]	GO:0009411//response to UV;GO:0010208//pollen wall assembly;GO:0016129;GO:0048878//chemical homeostasis;GO:0000902//cell morphogenesis;GO:0009908//flower development	GO:0016709//oxidoreductase activity, acting on paired donors, with incorporation or reduction of molecular oxygen, NADH or NADPH as one donor, and incorporation of one atom of oxygen;GO:0005506//iron ion binding	-
	Unigene11905	0	0	0	2.29	13.26	0	0	0.55	5.78	14.99	309	4	0.9955	gi|220966833|gb|ACL97384.1|	142	9e-41	Gag-Pol polyprotein [Medicago truncatula]	sp|P10978|POLX_TOBAC	79	9e-15	Retrovirus-related Pol polyprotein from transposon TNT 1-94 OS=Nicotiana tabacum PE=2 SV=1	--	--	--	--	--	--	--	--	--	--	GO:0006259//DNA metabolic process	GO:0046914//transition metal ion binding;GO:0003676//nucleic acid binding	-
	Unigene11965	5.29	9.02	14.23	11.9	56.35	3.05	1.83	2.97	3.96	10.17	1325	243	14.103	gi|78192243|gb|ABB30162.1|	636	0	sucrose transport protein SUF4 [Pisum sativum]	sp|Q9FE59|SUC4_ARATH	483	1e-135	Sucrose transport protein SUC4 OS=Arabidopsis thaliana GN=SUC4 PE=1 SV=2	--	--	--	--	--	--	--	--	--	--	GO:0015766	GO:0015154	GO:0016021//integral to membrane
	Unigene12126	2.69	16.2	23.6	24.62	53.44	4.3	0.24	10.9	2.17	4.18	770	75	7.4902	gi|7705214|gb|AAB33480.2|	218	1e-100	alcohol dehydrogenase ADH [Solanum lycopersicum]	sp|Q9FH04|ADHL7_ARATH	219	2e-96	Alcohol dehydrogenase-like 7 OS=Arabidopsis thaliana GN=At5g42250 PE=2 SV=1	YDL168w	135	8e-51	COG1062	Zn-dependent alcohol dehydrogenases, class III	K00121	4e-105	230	vvi:100264420	S-(hydroxymethyl)glutathione dehydrogenase / alcohol dehydrogenase [EC:1.1.1.284 1.1.1.1]	GO:0008152//metabolic process	GO:0003824//catalytic activity;GO:0046914//transition metal ion binding	-
	Unigene12148	0.23	0.25	0	0.76	10.15	0.26	0.27	4.67	2.17	5.53	697	48	5.2958	gi|259121421|gb|ACV92030.1|	202	7e-82	WRKY transcription factor 28 [(Populus tomentosa x P. bolleana) x P. tomentosa]	sp|Q9C519|WRKY6_ARATH	175	2e-73	WRKY transcription factor 6 OS=Arabidopsis thaliana GN=WRKY6 PE=1 SV=1	--	--	--	--	--	K13424	2e-18	76.6	ath:AT2G38470	WRKY transcription factor 33	GO:0009267//cellular response to starvation;GO:0009743//response to carbohydrate stimulus;GO:0010468//regulation of gene expression;GO:0006351//transcription, DNA-dependent	GO:0043565//sequence-specific DNA binding	GO:0043231//intracellular membrane-bounded organelle
	Unigene12172	0	0	0	1.97	5.17	0	0	0	2.63	6.57	360	10	2.1361	gi|124360489|gb|ABN08499.1|	115	6e-49	U box [Medicago truncatula]	sp|Q681N2|PUB15_ARATH	73.2	2e-23	U-box domain-containing protein 15 OS=Arabidopsis thaliana GN=PUB15 PE=2 SV=2	--	--	--	--	--	--	--	--	--	--	GO:0032446//protein modification by small protein conjugation	GO:0019787//small conjugating protein ligase activity	GO:0043234//protein complex;GO:0044424//intracellular part
	Unigene12196	0.6	0.66	1.42	3.9	19.06	2.09	9.49	2.47	2.01	5.19	1319	65	3.7896	gi|297829362|ref|XP_002882563.1|	489	1e-176	phosphatidylinositol-4-phosphate 5-kinase family protein [Arabidopsis lyrata subsp. lyrata] >gi|297328403|gb|EFH58822.1| phosphatidylinositol-4-phosphate 5-kinase family protein [Arabidopsis lyrata subsp. lyrata]	sp|Q9SFB8|PI5K6_ARATH	489	5e-176	Phosphatidylinositol-4-phosphate 5-kinase 6 OS=Arabidopsis thaliana GN=PIP5K6 PE=2 SV=1	SPAC19G12.14	194	3e-49	COG5253	Phosphatidylinositol-4-phosphate 5-kinase	K00889	0	514	pop:POPTR_555053	1-phosphatidylinositol-4-phosphate 5-kinase [EC:2.7.1.68]	GO:0030384//phosphoinositide metabolic process	GO:0016307//phosphatidylinositol phosphate kinase activity;GO:0032559//adenyl ribonucleotide binding	-
	Unigene12203	0	0	0	1.23	5.82	0	0	0	4.73	12.13	288	7	1.8691	gi|78099801|sp|Q9SFU0.2|SC24A_ARATH	105	2e-34	RecName: Full=Protein transport protein Sec24-like At3g07100	sp|Q9SFU0|SC24A_ARATH	105	1e-34	Protein transport protein Sec24-like At3g07100 OS=Arabidopsis thaliana GN=At3g07100 PE=1 SV=2	YIL109c	52.8	3e-10	COG5028	Vesicle coat complex COPII, subUnit SEC24/subUnit SFB2/subUnit SFB3	--	--	--	--	--	GO:0048193//Golgi vesicle transport;GO:0015031//protein transport	GO:0046914//transition metal ion binding	GO:0012507//ER to Golgi transport vesicle membrane
	Unigene12238	15.43	12.54	11.45	37.58	111.92	9.94	21.92	0.72	2.98	8.32	1424	413	22.3028	gi|2262201|gb|AAC49756.1|	507	1e-171	gibberellin 20-oxidase [Phaseolus vulgaris]	sp|Q39110|GAOX1_ARATH	424	1e-137	Gibberellin 20 oxidase 1 OS=Arabidopsis thaliana GN=20ox1 PE=2 SV=2	PA0147	96.3	1e-21	COG3491	Isopenicillin N synthase and related dioxygenases	K05282	9e-139	424	ath:AT4G25420	gibberellin 20-oxidase [EC:1.14.11.12]	GO:0008152//metabolic process	GO:0003824//catalytic activity;GO:0046914//transition metal ion binding	-
	Unigene12301	0.25	0.95	1.33	10.38	34.76	1.01	0.58	0.54	3.35	8.94	1280	138	8.2907	gi|116831754|gb|ABK28851.1|	761	0	alpha-tubulin [Medicago truncatula] >gi|124361008|gb|ABN08980.1| Tubulin/FtsZ, C-terminal [Medicago truncatula]	sp|P33627|TBA6_MAIZE	757	0	Tubulin alpha-6 chain OS=Zea mays GN=TUBA6 PE=2 SV=1	SPBC16A3.15c	609	3e-174	COG5023	Tubulin	K07374	0	759	vvi:100260286	tubulin alpha	GO:0010038//response to metal ion;GO:0043623//cellular protein complex assembly;GO:0007017//microtubule-based process;GO:0009629//response to gravity	GO:0017111//nucleoside-triphosphatase activity;GO:0032561//guanyl ribonucleotide binding	GO:0043234//protein complex;GO:0015630//microtubule cytoskeleton;GO:0030312//external encapsulating structure;GO:0044444//cytoplasmic part;GO:0016020//membrane
	Unigene1303	0	0.82	0.54	3.64	15.02	1.16	0	0	4.12	10.86	632	43	5.232	gi|115472445|ref|NP_001059821.1|	207	1e-52	Os07g0524100 [Oryza sativa Japonica Group] >gi|50508559|dbj|BAD30858.1| thioredoxin family-like protein [Oryza sativa Japonica Group] >gi|113611357|dbj|BAF21735.1| Os07g0524100 [Oryza sativa Japonica Group]	sp|Q9DC16|ERGI1_MOUSE	65.1	3e-10	Endoplasmic reticulum-Golgi intermediate compartment protein 1 OS=Mus musculus GN=Ergic1 PE=1 SV=1	--	--	--	--	--	--	--	--	--	--	GO:0019725//cellular homeostasis	GO:0016862//intramolecular oxidoreductase activity, interconverting keto- and enol-groups	-
	Unigene1304	11.54	11.72	9.03	18.83	41.37	8.88	5.42	11.58	2.2	7.36	207	29	10.7733	gi|15215638|gb|AAK91364.1|	66.6	8e-11	AT5g52200/F17P19_10 [Arabidopsis thaliana] >gi|21435989|gb|AAM51572.1| AT5g52200/F17P19_10 [Arabidopsis thaliana]	--	--	--	--	--	--	--	--	--	--	--	--	--	--	GO:0007165//signal transduction;GO:0010921	GO:0019212//phosphatase inhibitor activity	-
	Unigene13366	1.77	1.05	0.34	8.93	44.11	0.74	0.94	0.17	4.94	13.57	992	88	6.8217	gi|18425121|ref|NP_569040.1|	285	8e-76	MAPKKK5; ATP binding / kinase/ protein kinase/ protein serine/threonine kinase [Arabidopsis thaliana]	sp|Q9FZ36|M3K2_ARATH	158	5e-38	Mitogen-activated protein kinase kinase kinase 2 OS=Arabidopsis thaliana GN=ANP2 PE=2 SV=1	YAR019c	114	2e-25	COG0515	Serine/threonine protein kinase	K13414	2e-35	146	vvi:100264291	mitogen-activated protein kinase kinase kinase 1, plant [EC:2.7.11.25]	GO:0006464//protein modification process	GO:0004672//protein kinase activity;GO:0032559//adenyl ribonucleotide binding	GO:0043231//intracellular membrane-bounded organelle;GO:0016020//membrane
	Unigene13546	1.65	1.57	1.32	8.95	23.15	3.81	0	1.11	2.59	6.82	772	42	4.1836	gi|223452371|gb|ACM89513.1|	273	2e-72	wall-associated kinase [Glycine max]	sp|P0C5E2|Y1839_ARATH	237	7e-62	Probable serine/threonine-protein kinase At1g18390 OS=Arabidopsis thaliana GN=At1g18390 PE=1 SV=2	PA0074_1	73.6	3e-13	COG0515	Serine/threonine protein kinase	K00924	4e-34	141	ath:AT1G14370	[EC:2.7.1.-]	GO:0006464//protein modification process	GO:0004672//protein kinase activity;GO:0032559//adenyl ribonucleotide binding	-
	Unigene13622	0	4.36	4.58	5.74	13.39	0.99	0	3.39	2.33	4.52	556	29	4.0109	gi|37787327|gb|AAP69614.1|	202	1e-81	nicotinate phosphoribosyltransferase-like protein [Medicago truncatula]	sp|Q9VQX4|PNCB_DROME	147	1e-50	Nicotinate phosphoribosyltransferase OS=Drosophila melanogaster GN=CG3714 PE=2 SV=2	L107468	57.8	3e-13	COG1488	Nicotinic acid phosphoribosyltransferase	K00763	1e-81	198	ath:AT2G23420	nicotinate phosphoribosyltransferase [EC:2.4.2.11]	GO:0019359;GO:0019357//nicotinate nucleotide biosynthetic process	GO:0016763//transferase activity, transferring pentosyl groups	-
	Unigene13624	0	0	0	5.87	15.42	0	0	0	2.63	6.57	483	19	3.025	gi|15242060|ref|NP_200530.1|	233	7e-61	epsin N-terminal homology (ENTH) domain-containing protein / clathrin assembly protein-related [Arabidopsis thaliana] >gi|46396004|sp|Q9LVD8.1|CAP7_ARATH RecName: Full=Putative clathrin assembly protein At5g57200	sp|Q8S9J8|CAP1_ARATH	105	1e-22	Probable clathrin assembly protein At4g32285 OS=Arabidopsis thaliana GN=At4g32285 PE=1 SV=1	--	--	--	--	--	--	--	--	--	--	GO:0006901//vesicle coating;GO:0008152//metabolic process	GO:0035091//phosphoinositide binding;GO:0005515//protein binding;GO:0016628//oxidoreductase activity, acting on the CH-CH group of donors, NAD or NADP as acceptor	GO:0030117//membrane coat;GO:0043231//intracellular membrane-bounded organelle
	Unigene13787	1.55	0.56	0	2.87	19.88	4.16	0.6	2.22	4.77	12.29	309	12	2.9864	gi|195607326|gb|ACG25493.1|	149	1e-35	histone H4 [Zea mays] >gi|195618804|gb|ACG31232.1| histone H4 [Zea mays] >gi|195630471|gb|ACG36629.1| histone H4 [Zea mays]	sp|P82888|H4_OLILU	148	9e-36	Histone H4 OS=Olisthodiscus luteus PE=1 SV=2	SPBC1105.12	139	1e-33	COG2036	Histones H3 and H4	K11254	5e-37	149	osa:4327457	histone H4	GO:0006950//response to stress;GO:0034728	GO:0003676//nucleic acid binding	GO:0000785//chromatin;GO:0016020//membrane;GO:0009536//plastid;GO:0031981//nuclear lumen
	Unigene13792	0	0	0	1.15	4.85	0	0	0.37	4.2	10.64	461	12	2.0017	gi|226497054|ref|NP_001151579.1|	120	6e-51	heat shock 70 kDa protein 4 [Zea mays]	sp|Q74ZJ0|HSP7F_ASHGO	87	2e-32	Heat shock protein homolog SSE1 OS=Ashbya gossypii GN=SSE1 PE=3 SV=1	YBR169c	86.3	5e-30	COG0443	Molecular chaperone	K09489	2e-28	121	osa:4325355	heat shock 70kDa protein 4	GO:0050896//response to stimulus	GO:0032559//adenyl ribonucleotide binding	-
	Unigene13807	0	0.32	0	8.22	82.56	1.02	0	0	10.04	26.66	539	194	27.6779	gi|284433804|gb|ADB85108.1|	162	2e-39	cytochrome b5 [Jatropha curcas]	sp|Q42342|CYB51_ARATH	153	5e-37	Cytochrome b5 isoform 1 OS=Arabidopsis thaliana GN=At5g53560 PE=2 SV=2	SPCC16A11.10c	96.7	2e-20	COG5274	Cytochrome b involved in lipid metabolism	K00360	7e-16	80.1	ath:AT1G37130	nitrate reductase (NADH) [EC:1.7.1.1]	GO:0008152//metabolic process	GO:0016491//oxidoreductase activity;GO:0005506//iron ion binding	GO:0031090//organelle membrane;GO:0009534//chloroplast thylakoid
	Unigene13810	3.68	0.47	1.38	4.09	28.58	5.99	0.25	0.93	4.77	11.92	736	38	3.9703	gi|92897781|gb|ABE93893.1|	104	1e-21	Heavy metal transport/detoxification protein [Medicago truncatula]	--	--	--	--	--	--	--	--	--	--	--	--	--	--	GO:0006812//cation transport	GO:0043169//cation binding	-
	Unigene15881	0	0	0	3.27	9.87	0	0	0	3.02	7.61	434	12	2.1262	gi|122937709|gb|ABM68566.1|	127	5e-29	hemolysin III-related family protein [Lilium longiflorum]	sp|Q91VH1|ADR1_MOUSE	72.8	7e-13	Adiponectin receptor protein 1 OS=Mus musculus GN=Adipor1 PE=1 SV=1	SPBC12C2.09c	50.1	1e-06	COG1272	Predicted membrane protein, hemolysin III homolog	K07297	4e-28	120	vvi:100248829	adiponectin receptor	GO:0009719//response to endogenous stimulus;GO:0034285	GO:0004871//signal transducer activity	GO:0031224//intrinsic to membrane
[truncated: 2,760 more rows]

## Sheet: Table S4C
Table S4C. The distribution of functional annotations of organ-downregulated unigenes in vetch (using cutoffs of a Ratio <0.5 and Z-score <-1.5). The numbers (Table A) and percentages (Table B) of the GO term distributions of the downregulated unigenes with putative functions in each group in vetch.
Table A
[truncated: 33 more rows]

## Sheet: Table S4D
Table S4D. The downregulated unigenes and their functional categories in vetch. This table displays the corresponding detailed information for the Table S4C, including the unigenes showing undetectable expression in the target organs and specific expression in the control organs (using cutoffs of a Ratio <0.5 and Z-score <-1.5)
[truncated: 4,413 more rows]
