# Supplementary material for: Comparative Transcriptional Profiling Provides Insights into the Evolution and Development of the Zygomorphic Flower of Vicia sativa (Papilionoideae)
Source: PLoS One. 2013 Feb 21;8(2):e57338. doi: 10.1371/journal.pone.0057338 (PMC3578871; doi:10.1371/journal.pone.0057338)
Supplement: Table S7 — Homologous comparison of the enriched floral transcripts between vetch and Arabidopsis . (XLS) [file pone.0057338.s014.xls]

## Sheet: Table S7 legend
Table S7. Homologous comparison of the enriched floral transcripts between vetch and Arabidopsis.
Table S7A. The numbers and percentages of unigenes enriched in the floral organs and their homologs displaying different expression patterns between vetch and Arabidopsis;
Table S7B. Homologous comparison via BLAST rearches against the Arabidopsis genome database using the transcripts enriched in vetch floral organs;
Table S7C. Homologous comparison via BLAST rearches against the vetch database using the transcripts enriched in Arabidopsis floral organs;
Table S7D. Homologous comparison via BLAST rearches against the Arabidopsis genome database using the transcripts enriched in the three types of vetch petals.

## Sheet: Table S7A
Table S7A. The numbers and percentages of unigenes enriched in the floral organs and their homologs displaying different expression patterns between vetch and Arabidopsis. The numbers and percentages of floral-enriched unigenes in vetch and their homologs displaying different expression patterns in Arabidopsis (Table A). The numbers and percentages of floral-enriched genes in Arabidopsis and thei…
Table A
Expression pattern	Sepals(%)	Three petals(%)	Stamens(%)	Carpels(%)	A domain genes (%)	B domain genes (%)	C domain genes (%)	Total (Average)
EE in vetch	861(100)	3541(100)	2811(100)	4011(100)	3797(100)	7798(100)	3375(100)	26194(100)
NH	689(80.0)	2933(82.8)	2041(72.6)	2590(64.6)	3211(84.6)	6198(79.5)	2380(70.5)	20042(76.4)
HH*	172(20.0)	608(17.2)	770(27.4)	1421(35.4)	586(15.4)	1600(20.5)	995(29.5)	6152(23.6)
DE	117(68.0)	383(63.0)	216(28.1)	1058(74.5)	390(66.6)	696(43.5)	507(51.0)	3367(56.4)
EE	17(9.9)	97(16.0)	473(61.4)	184(13.0)	88(15.0)	712(44.5)	324(32.6)	1895(27.5)
UE	38(22.1)	128(21.1)	81(10.5)	179(12.6)	108(18.4)	192(12.0)	164(16.5)	890(16.2)
Table B
Expression pattern	Sepals	Petals	Stamens	Carpels	A domain gene	B domain genes	C domain genes	Total (Average)
EE in Arabidopsis	293(100)	368(100)	1768(100)	506(100)	321(100)	1580(100)	1576(100)	6412(100)
NH	119(40.6)	138(37.5)	764(43.2)	256(50.6)	127(39.6)	726(46.0)	786(49.9)	2916(43.9)
HH*	174(59.4)	230(62.5)	1004(56.8)	250(49.4)	194(60.4)	854(54.1)	790(50.1)	3496(56.1)
DE	143(82.2)	151(65.7)	556(55.4)	96(38.4)	126(65.0)	367(43.0)	451(57.1)	1890(58.1)
EE	11(6.3)	50(21.7)	365(36.4)	120(48.0)	47(24.2)	430(50.4)	268(33.9)	1291(31.6)
UE	20(11.5)	29(12.6)	83(8.3)	34(13.6)	21(10.8)	57(6.7)	71(9.0)	315(10.4)
Table C
Expression pattern	Dorsal petals	Lateral petals	Ventral petals	Total (Average)
EE in vetch	462(100)	435(100)	922(100)	1819(100)
NH	424(91.8)	408(93.8)	836(90.7)	1668(92.1)
HH*	38(8.2)	27(6.2)	86(9.3)	151(7.9)
DE	22(57.9)	14(51.9)	60(69.8)	96(59.9)
EE	6(15.8)	6(22.2)	9(10.5)	21(16.2)
UE	10(26.3)	7(25.9)	17(19.8)	34(24.0)

## Sheet: Table S7B
Table S7B. Homologous comparison via BLAST rearches against the Arabidopsis genome database using the transcripts enriched in vetch floral organs. This table displays the corresponding detailed information for Table A in Table S7A. a, Information of corresponding Arabidopsis sequences when BLAST against the Arabidopsis genome database using the vetch sequences; EE, enriched expression; DE, detect…
Organs	Query ID of vetch	Subject ID of Arabidopsis	Identity(%)a	E-valuea	Scorea	Expression pattern
Sepals	Unigene11424	AT5G06860	91.67	8e-07	48.1	EE
	Unigene36542	AT1G63910	86.58	5e-32	137	EE
	Unigene37203	AT5G37430	97.14	2e-09	61.9	EE
	Unigene4065	AT4G37370	96.15	8e-06	44.1	EE
	Unigene43098	AT2G03090	82.46	2e-28	125	EE
	Unigene49316	AT5G37420	97.14	3e-09	61.9	EE
	Unigene5142	AT2G36750	96.43	1e-06	48.1	EE
	Unigene576	AT5G43450	94.74	5e-08	60	EE
	Unigene58362	AT3G55090	87.04	4e-37	155	EE
	Unigene59706	AT2G37362	90.22	6e-24	111	EE
	Unigene64710	AT3G16340	83.05	1e-35	151	EE
	Unigene65754	AT2G25737	82.73	5e-16	85.7	EE
	Unigene66499	AT5G65760	83.67	1e-10	67.9	EE
	Unigene67035	AT5G55930	83.22	2e-19	97.6	EE
	Unigene67909	AT1G59870	90.57	6e-10	65.9	EE
	Unigene68153	AT1G72180	82.57	6e-10	65.9	EE
	Unigene68824	AT5G55930	88.14	1e-08	61.9	EE
	Unigene10247	AT2G39830	78.37	1e-23	111	DE
	Unigene10490	AT4G20900	85.29	2e-07	56	DE
	Unigene11127	AT4G18780	79.53	6e-40	167	DE
	Unigene11494	AT5G45800	88.24	1e-06	54	DE
	Unigene11909	AT5G58860	83.23	2e-20	101	DE
	Unigene12081	AT3G16180	90.91	4e-07	56	DE
	Unigene12573	AT5G17420	83.33	2e-17	91.7	DE
	Unigene13061	AT1G69120	83.68	1e-29	131	DE
	Unigene13470	AT2G21340	82.79	5e-13	75.8	DE
	Unigene13995	AT1G59820	77.92	3e-45	182	DE
	Unigene15040	AT2G20900	83	2e-09	63.9	DE
	Unigene15319	AT1G77380	84.87	2e-18	93.7	DE
	Unigene15400	AT5G48850	78.1	6e-14	77.8	DE
	Unigene15632	AT2G43330	81.31	2e-06	54	DE
	Unigene16773	AT5G58770	83.1	1e-17	91.7	DE
	Unigene17130	AT5G54390	80.54	1e-09	65.9	DE
	Unigene17211	AT4G14540	82.51	2e-30	133	DE
	Unigene17490	AT3G03770	85.29	8e-15	83.8	DE
	Unigene1813	ATMG00513	93.89	4e-132	470	DE
	Unigene18600	ATCG00490	87.07	2e-33	141	DE
	Unigene21418	AT1G69120	89.38	8e-30	129	DE
	Unigene23	AT3G14420	83.72	1e-08	60	DE
	Unigene23406	AT2G03090	90	7e-09	60	DE
	Unigene24721	AT3G25530	84.35	1e-16	85.7	DE
	Unigene2475	AT3G02060	80.21	1e-94	349	DE
	Unigene24769	AT1G67850	87.93	7e-09	60	DE
	Unigene2772	AT4G23220	93.02	4e-09	61.9	DE
	Unigene29070	AT5G45380	84.12	6e-28	123	DE
	Unigene2927	AT3G20810	87.32	8e-12	69.9	DE
	Unigene29312	AT2G07711	96.3	3e-73	274	DE
	Unigene29566	ATMG00210	94.24	1e-78	291	DE
	Unigene32013	AT3G19000	88.24	5e-07	54	DE
	Unigene32591	AT3G18830	80.43	9e-15	79.8	DE
	Unigene32706	AT5G40780	91.53	4e-14	77.8	DE
	Unigene32745	AT3G25690	85.9	3e-11	67.9	DE
	Unigene33008	AT5G63870	87.27	5e-07	54	DE
	Unigene3372	AT1G70820	78.54	7e-11	69.9	DE
	Unigene37703	AT5G15450	81.06	1e-23	109	DE
	Unigene386	AT1G70250	90.48	9e-06	52	DE
	Unigene39009	AT1G59820	86.16	2e-50	198	DE
	Unigene39855	AT5G15450	79.06	3e-09	61.9	DE
	Unigene41819	AT1G33080	88.46	2e-07	56	DE
	Unigene4237	AT5G51640	81.43	2e-26	121	DE
	Unigene42492	ATCG00350	95.55	6e-112	402	DE
	Unigene42787	ATCG00340	94.9	6e-112	402	DE
	Unigene43125	AT4G08310	100	4e-06	50.1	DE
	Unigene43176	AT2G20340	83.96	2e-13	75.8	DE
	Unigene44385	AT1G29660	86.79	4e-06	50.1	DE
	Unigene44935	AT4G11900	90.7	7e-07	54	DE
	Unigene46220	AT5G20150	90.7	7e-07	54	DE
	Unigene47205	AT2G20340	92.45	8e-13	73.8	DE
	Unigene47333	AT3G46970	79.68	9e-19	93.7	DE
	Unigene48075	AT2G20340	89.23	8e-13	73.8	DE
	Unigene48792	AT3G20540	85.44	2e-16	85.7	DE
	Unigene48958	AT1G59820	85.16	3e-28	125	DE
	Unigene48982	AT2G21340	84.21	4e-24	111	DE
	Unigene49269	AT1G06620	85.07	8e-07	54	DE
	Unigene5111	AT3G45140	84.52	3e-09	63.9	DE
	Unigene517	AT5G56650	83.21	5e-17	89.7	DE
	Unigene52960	AT4G29840	81.36	5e-33	141	DE
	Unigene53138	AT1G35710	87.5	2e-07	56	DE
	Unigene53465	AT1G18485	83.75	2e-07	56	DE
	Unigene53569	AT2G16130	85.71	6e-14	77.8	DE
	Unigene53580	AT4G29840	83.57	8e-63	240	DE
	Unigene54295	ATCG00720	87.39	1e-58	226	DE
	Unigene54532	AT5G63630	79.55	7e-20	97.6	DE
	Unigene55490	AT5G08610	80.15	1e-06	54	DE
	Unigene56033	AT5G51750	100	7e-08	58	DE
	Unigene5656	AT5G33280	83.33	7e-11	67.9	DE
	Unigene57709	AT3G20810	81.61	3e-13	75.8	DE
	Unigene57966	AT1G59820	89.29	1e-09	63.9	DE
	Unigene58946	AT5G28840	85.68	2e-97	355	DE
	Unigene60359	AT3G46970	79.09	1e-18	93.7	DE
	Unigene60983	ATCG00340	92.38	1e-164	579	DE
	Unigene6163	AT5G55930	84.78	3e-12	71.9	DE
	Unigene61630	AT4G24130	82.56	5e-06	52	DE
	Unigene61668	AT1G69120	87.93	3e-26	119	DE
	Unigene61678	ATCG00350	91.14	0	650	DE
	Unigene62104	AT5G45380	87.5	4e-07	56	DE
	Unigene63518	AT3G19270	79.85	7e-21	101	DE
	Unigene63593	AT3G20810	83.67	1e-10	67.9	DE
	Unigene63602	AT2G40080	85.23	7e-12	71.9	DE
	Unigene63899	AT4G26640	94.12	2e-21	103	DE
	Unigene64158	ATCG00490	90.48	1e-145	515	DE
	Unigene64534	AT5G17850	89.13	7e-06	52	DE
	Unigene64622	AT5G63630	82.79	5e-13	75.8	DE
	Unigene65046	ATCG00350	92.79	0	900	DE
	Unigene65647	ATCG00340	91.22	0	864	DE
	Unigene66144	AT2G47600	81.21	1e-41	170	DE
	Unigene66840	AT4G26640	85	2e-28	127	DE
	Unigene67168	AT2G47600	78.75	5e-10	65.9	DE
	Unigene67707	AT3G46970	80.54	1e-29	131	DE
	Unigene67736	AT4G09810	86.54	7e-19	95.6	DE
	Unigene67820	AT1G72810	81.33	3e-36	153	DE
	Unigene67988	AT1G58170	87.14	2e-10	67.9	DE
	Unigene68088	ATCG00340	91.42	0	1108	DE
	Unigene68468	AT5G08610	86.24	2e-19	97.6	DE
	Unigene69468	AT3G17998	78.18	1e-17	91.7	DE
	Unigene69617	ATCG00490	91.5	0	1092	DE
	Unigene69678	AT2G04030	80.79	8e-127	454	DE
	Unigene69810	ATCG00430	86.69	2e-170	599	DE
	Unigene70283	AT5G44340	81.32	2e-127	456	DE
	Unigene70571	AT3G51860	79.26	7e-23	109	DE
	Unigene70849	AT3G46970	80.77	2e-47	190	DE
	Unigene70983	AT5G12900	89.39	1e-12	75.8	DE
	Unigene71085	AT1G68990	78.64	4e-37	157	DE
	Unigene71533	AT2G36670	88.46	2e-23	111	DE
	Unigene71756	AT1G63680	78.17	4e-59	230	DE
	Unigene7620	ATMG00220	99.19	7e-62	236	DE
	Unigene788	AT3G42310	100	5e-11	67.9	DE
	Unigene8195	AT1G72520	85.94	7e-07	56	DE
	Unigene8743	ATMG00513	97.57	7e-124	442	DE
	Unigene8781	AT5G44030	80.67	8e-07	54	DE
	Unigene9335	AT5G17420	89.71	8e-14	79.8	DE
	Unigene9648	AT1G77380	89.29	7e-10	63.9	DE
	Unigene9911	AT1G08040	79.67	9e-38	159	DE
	Unigene9922	AT4G02050	79.9	5e-13	75.8	DE
	Unigene12320	AT1G47578	94.74	1e-08	60	UE
	Unigene14323	AT1G18410	81.18	3e-30	133	UE
	Unigene16125	AT3G22410	96.88	5e-07	56	UE
	Unigene19028	AT4G16010	92.11	1e-06	52	UE
	Unigene19338	AT2G35030	94.74	6e-09	60	UE
	Unigene19697	AT5G16770	94.74	6e-09	60	UE
	Unigene32786	AT3G14630	92.68	3e-08	58	UE
	Unigene36253	AT2G41370	81.89	9e-12	69.9	UE
	Unigene37176	AT1G48640	83.84	1e-11	69.9	UE
	Unigene39111	AT1G76690	92.5	2e-07	56	UE
	Unigene43302	AT3G22415	82.93	3e-06	52	UE
	Unigene4454	AT5G65090	88.24	2e-06	54	UE
	Unigene45745	AT1G63910	85.25	1e-20	99.6	UE
	Unigene46998	AT3G55090	83.33	1e-08	60	UE
	Unigene48586	AT5G55020	97.37	5e-11	67.9	UE
	Unigene4868	AT4G10020	90.24	9e-06	50.1	UE
	Unigene48848	AT3G50400	81.4	2e-10	65.9	UE
	Unigene49435	AT5G41040	89.42	2e-26	119	UE
	Unigene50931	AT2G22590	85	9e-10	63.9	UE
	Unigene5275	AT2G35030	91.89	8e-06	50.1	UE
	Unigene55372	AT4G21000	90.91	2e-11	69.9	UE
	Unigene57051	AT3G60780	97.14	4e-09	61.9	UE
	Unigene58078	AT1G76690	85.14	2e-08	60	UE
	Unigene59289	AT5G06800	84.36	2e-30	133	UE
	Unigene63921	AT3G43790	88.89	3e-11	69.9	UE
	Unigene66092	AT5G65230	87.04	7e-06	52	UE
	Unigene66644	AT5G05340	78.28	5e-13	75.8	UE
	Unigene67289	AT3G61320	85.16	3e-21	103	UE
	Unigene67567	AT4G36830	87.65	1e-14	81.8	UE
	Unigene67836	AT1G66950	80.8	1e-07	58	UE
	Unigene68580	AT2G16130	83.5	4e-11	69.9	UE
	Unigene6900	AT5G37690	84.16	2e-12	73.8	UE
	Unigene69226	AT1G02360	78.01	2e-07	58	UE
	Unigene70182	AT5G19870	85.51	2e-07	58	UE
	Unigene759	AT3G03580	96.67	2e-06	52	UE
	Unigene7871	AT4G32800	89.8	9e-08	58	UE
	Unigene808	AT2G41370	78.8	4e-25	115	UE
	Unigene9710	AT3G12220	85.92	3e-09	61.9	UE
	Unigene10013	-	-	-	-	NH
	Unigene101	-	-	-	-	NH
	Unigene10141	-	-	-	-	NH
	Unigene10232	-	-	-	-	NH
	Unigene10251	-	-	-	-	NH
	Unigene10491	-	-	-	-	NH
	Unigene10537	-	-	-	-	NH
	Unigene10581	-	-	-	-	NH
	Unigene10655	-	-	-	-	NH
	Unigene10704	-	-	-	-	NH
	Unigene10709	-	-	-	-	NH
	Unigene10716	-	-	-	-	NH
	Unigene1078	-	-	-	-	NH
	Unigene10903	-	-	-	-	NH
	Unigene11145	-	-	-	-	NH
	Unigene1122	-	-	-	-	NH
	Unigene11226	-	-	-	-	NH
	Unigene11340	-	-	-	-	NH
	Unigene11450	-	-	-	-	NH
	Unigene11512	-	-	-	-	NH
	Unigene11615	-	-	-	-	NH
	Unigene12188	-	-	-	-	NH
	Unigene12194	-	-	-	-	NH
	Unigene12295	-	-	-	-	NH
	Unigene12312	-	-	-	-	NH
	Unigene12385	-	-	-	-	NH
	Unigene12420	-	-	-	-	NH
	Unigene12473	-	-	-	-	NH
	Unigene12561	-	-	-	-	NH
	Unigene12564	-	-	-	-	NH
	Unigene12743	-	-	-	-	NH
	Unigene12898	-	-	-	-	NH
	Unigene1317	-	-	-	-	NH
	Unigene13236	-	-	-	-	NH
	Unigene13393	-	-	-	-	NH
	Unigene1341	-	-	-	-	NH
	Unigene13517	-	-	-	-	NH
	Unigene13879	-	-	-	-	NH
	Unigene14024	-	-	-	-	NH
	Unigene14036	-	-	-	-	NH
	Unigene14279	-	-	-	-	NH
	Unigene14291	-	-	-	-	NH
	Unigene14331	-	-	-	-	NH
	Unigene14340	-	-	-	-	NH
	Unigene1436	-	-	-	-	NH
	Unigene14461	-	-	-	-	NH
	Unigene14492	-	-	-	-	NH
	Unigene14672	-	-	-	-	NH
	Unigene14697	-	-	-	-	NH
	Unigene14721	-	-	-	-	NH
	Unigene14995	-	-	-	-	NH
	Unigene15145	-	-	-	-	NH
	Unigene15196	-	-	-	-	NH
	Unigene1527	-	-	-	-	NH
	Unigene15292	-	-	-	-	NH
	Unigene15390	-	-	-	-	NH
	Unigene15399	-	-	-	-	NH
	Unigene1560	-	-	-	-	NH
	Unigene15612	-	-	-	-	NH
	Unigene1566	-	-	-	-	NH
	Unigene15670	-	-	-	-	NH
	Unigene1572	-	-	-	-	NH
	Unigene16609	-	-	-	-	NH
	Unigene16964	-	-	-	-	NH
	Unigene16974	-	-	-	-	NH
	Unigene17582	-	-	-	-	NH
	Unigene1801	-	-	-	-	NH
	Unigene18357	-	-	-	-	NH
	Unigene18434	-	-	-	-	NH
	Unigene18456	-	-	-	-	NH
	Unigene18525	-	-	-	-	NH
	Unigene1855	-	-	-	-	NH
	Unigene18550	-	-	-	-	NH
	Unigene18607	-	-	-	-	NH
	Unigene18626	-	-	-	-	NH
	Unigene18646	-	-	-	-	NH
	Unigene18702	-	-	-	-	NH
	Unigene18745	-	-	-	-	NH
	Unigene18766	-	-	-	-	NH
	Unigene18767	-	-	-	-	NH
	Unigene18776	-	-	-	-	NH
	Unigene18812	-	-	-	-	NH
	Unigene18861	-	-	-	-	NH
	Unigene18925	-	-	-	-	NH
	Unigene18936	-	-	-	-	NH
	Unigene19022	-	-	-	-	NH
	Unigene1916	-	-	-	-	NH
	Unigene19208	-	-	-	-	NH
	Unigene19266	-	-	-	-	NH
	Unigene19361	-	-	-	-	NH
	Unigene1943	-	-	-	-	NH
	Unigene1954	-	-	-	-	NH
	Unigene19749	-	-	-	-	NH
	Unigene19880	-	-	-	-	NH
	Unigene19895	-	-	-	-	NH
	Unigene19963	-	-	-	-	NH
	Unigene19964	-	-	-	-	NH
	Unigene20039	-	-	-	-	NH
	Unigene20061	-	-	-	-	NH
	Unigene20071	-	-	-	-	NH
	Unigene20085	-	-	-	-	NH
	Unigene20103	-	-	-	-	NH
	Unigene20118	-	-	-	-	NH
	Unigene20250	-	-	-	-	NH
	Unigene2028	-	-	-	-	NH
	Unigene20301	-	-	-	-	NH
	Unigene20337	-	-	-	-	NH
	Unigene20585	-	-	-	-	NH
	Unigene20587	-	-	-	-	NH
	Unigene20606	-	-	-	-	NH
	Unigene20637	-	-	-	-	NH
	Unigene20712	-	-	-	-	NH
	Unigene20732	-	-	-	-	NH
	Unigene20828	-	-	-	-	NH
	Unigene20852	-	-	-	-	NH
	Unigene20900	-	-	-	-	NH
	Unigene20956	-	-	-	-	NH
	Unigene210	-	-	-	-	NH
	Unigene21069	-	-	-	-	NH
	Unigene21075	-	-	-	-	NH
	Unigene21108	-	-	-	-	NH
	Unigene21170	-	-	-	-	NH
	Unigene21206	-	-	-	-	NH
	Unigene21213	-	-	-	-	NH
	Unigene21228	-	-	-	-	NH
	Unigene21311	-	-	-	-	NH
	Unigene21332	-	-	-	-	NH
	Unigene21460	-	-	-	-	NH
	Unigene21649	-	-	-	-	NH
	Unigene21739	-	-	-	-	NH
	Unigene21742	-	-	-	-	NH
	Unigene21778	-	-	-	-	NH
	Unigene21834	-	-	-	-	NH
	Unigene21890	-	-	-	-	NH
	Unigene21972	-	-	-	-	NH
	Unigene21993	-	-	-	-	NH
	Unigene22000	-	-	-	-	NH
	Unigene22043	-	-	-	-	NH
	Unigene22101	-	-	-	-	NH
	Unigene22141	-	-	-	-	NH
	Unigene22218	-	-	-	-	NH
	Unigene2223	-	-	-	-	NH
	Unigene22269	-	-	-	-	NH
	Unigene22274	-	-	-	-	NH
	Unigene22310	-	-	-	-	NH
	Unigene22414	-	-	-	-	NH
	Unigene22535	-	-	-	-	NH
	Unigene22556	-	-	-	-	NH
	Unigene22573	-	-	-	-	NH
	Unigene22664	-	-	-	-	NH
	Unigene22675	-	-	-	-	NH
	Unigene22732	-	-	-	-	NH
	Unigene22802	-	-	-	-	NH
	Unigene22870	-	-	-	-	NH
	Unigene22933	-	-	-	-	NH
	Unigene22955	-	-	-	-	NH
	Unigene23280	-	-	-	-	NH
	Unigene23346	-	-	-	-	NH
	Unigene23688	-	-	-	-	NH
	Unigene23713	-	-	-	-	NH
	Unigene23723	-	-	-	-	NH
	Unigene23753	-	-	-	-	NH
	Unigene23906	-	-	-	-	NH
	Unigene24054	-	-	-	-	NH
	Unigene24100	-	-	-	-	NH
	Unigene24107	-	-	-	-	NH
	Unigene24120	-	-	-	-	NH
	Unigene24160	-	-	-	-	NH
	Unigene24166	-	-	-	-	NH
	Unigene24198	-	-	-	-	NH
	Unigene24201	-	-	-	-	NH
	Unigene24238	-	-	-	-	NH
	Unigene24277	-	-	-	-	NH
	Unigene24294	-	-	-	-	NH
	Unigene24308	-	-	-	-	NH
	Unigene24614	-	-	-	-	NH
	Unigene24637	-	-	-	-	NH
	Unigene24837	-	-	-	-	NH
	Unigene24954	-	-	-	-	NH
	Unigene25073	-	-	-	-	NH
	Unigene25105	-	-	-	-	NH
	Unigene25302	-	-	-	-	NH
	Unigene2532	-	-	-	-	NH
	Unigene25338	-	-	-	-	NH
	Unigene25412	-	-	-	-	NH
	Unigene25491	-	-	-	-	NH
	Unigene25492	-	-	-	-	NH
	Unigene2557	-	-	-	-	NH
	Unigene25808	-	-	-	-	NH
	Unigene25871	-	-	-	-	NH
	Unigene25948	-	-	-	-	NH
	Unigene26034	-	-	-	-	NH
	Unigene26132	-	-	-	-	NH
	Unigene26148	-	-	-	-	NH
	Unigene26173	-	-	-	-	NH
	Unigene26237	-	-	-	-	NH
	Unigene26357	-	-	-	-	NH
	Unigene2639	-	-	-	-	NH
	Unigene2649	-	-	-	-	NH
	Unigene26580	-	-	-	-	NH
	Unigene26656	-	-	-	-	NH
	Unigene26712	-	-	-	-	NH
	Unigene26797	-	-	-	-	NH
	Unigene26837	-	-	-	-	NH
	Unigene26860	-	-	-	-	NH
	Unigene27046	-	-	-	-	NH
	Unigene27062	-	-	-	-	NH
	Unigene27073	-	-	-	-	NH
	Unigene27121	-	-	-	-	NH
	Unigene27130	-	-	-	-	NH
	Unigene27241	-	-	-	-	NH
	Unigene2725	-	-	-	-	NH
	Unigene27313	-	-	-	-	NH
	Unigene2741	-	-	-	-	NH
	Unigene2751	-	-	-	-	NH
	Unigene27603	-	-	-	-	NH
	Unigene27643	-	-	-	-	NH
	Unigene27726	-	-	-	-	NH
	Unigene27755	-	-	-	-	NH
	Unigene2786	-	-	-	-	NH
	Unigene27972	-	-	-	-	NH
	Unigene28014	-	-	-	-	NH
	Unigene28240	-	-	-	-	NH
	Unigene28306	-	-	-	-	NH
	Unigene28331	-	-	-	-	NH
	Unigene28351	-	-	-	-	NH
	Unigene28459	-	-	-	-	NH
	Unigene28592	-	-	-	-	NH
	Unigene287	-	-	-	-	NH
	Unigene28711	-	-	-	-	NH
	Unigene28754	-	-	-	-	NH
	Unigene28785	-	-	-	-	NH
	Unigene28986	-	-	-	-	NH
	Unigene29012	-	-	-	-	NH
	Unigene29057	-	-	-	-	NH
	Unigene29159	-	-	-	-	NH
	Unigene29219	-	-	-	-	NH
	Unigene29222	-	-	-	-	NH
	Unigene29246	-	-	-	-	NH
	Unigene29261	-	-	-	-	NH
	Unigene29265	-	-	-	-	NH
	Unigene29287	-	-	-	-	NH
	Unigene29351	-	-	-	-	NH
	Unigene29477	-	-	-	-	NH
	Unigene29504	-	-	-	-	NH
	Unigene29571	-	-	-	-	NH
	Unigene29615	-	-	-	-	NH
	Unigene29658	-	-	-	-	NH
	Unigene29662	-	-	-	-	NH
	Unigene29745	-	-	-	-	NH
	Unigene29763	-	-	-	-	NH
	Unigene2999	-	-	-	-	NH
	Unigene30005	-	-	-	-	NH
	Unigene30037	-	-	-	-	NH
	Unigene30129	-	-	-	-	NH
	Unigene3014	-	-	-	-	NH
	Unigene30153	-	-	-	-	NH
	Unigene30269	-	-	-	-	NH
	Unigene30286	-	-	-	-	NH
	Unigene30320	-	-	-	-	NH
	Unigene30390	-	-	-	-	NH
	Unigene30423	-	-	-	-	NH
	Unigene30449	-	-	-	-	NH
	Unigene30469	-	-	-	-	NH
	Unigene30538	-	-	-	-	NH
	Unigene30576	-	-	-	-	NH
	Unigene30595	-	-	-	-	NH
	Unigene30616	-	-	-	-	NH
	Unigene30747	-	-	-	-	NH
	Unigene30776	-	-	-	-	NH
	Unigene30896	-	-	-	-	NH
	Unigene30918	-	-	-	-	NH
	Unigene30958	-	-	-	-	NH
	Unigene31001	-	-	-	-	NH
	Unigene31024	-	-	-	-	NH
	Unigene31031	-	-	-	-	NH
	Unigene31108	-	-	-	-	NH
	Unigene31119	-	-	-	-	NH
	Unigene31141	-	-	-	-	NH
	Unigene31174	-	-	-	-	NH
	Unigene3129	-	-	-	-	NH
	Unigene31316	-	-	-	-	NH
	Unigene31343	-	-	-	-	NH
	Unigene31429	-	-	-	-	NH
	Unigene31531	-	-	-	-	NH
	Unigene31558	-	-	-	-	NH
	Unigene31581	-	-	-	-	NH
	Unigene31633	-	-	-	-	NH
	Unigene31647	-	-	-	-	NH
	Unigene31679	-	-	-	-	NH
	Unigene3176	-	-	-	-	NH
	Unigene31778	-	-	-	-	NH
	Unigene31794	-	-	-	-	NH
	Unigene31811	-	-	-	-	NH
	Unigene32029	-	-	-	-	NH
	Unigene32085	-	-	-	-	NH
	Unigene32118	-	-	-	-	NH
	Unigene32130	-	-	-	-	NH
	Unigene32141	-	-	-	-	NH
	Unigene32161	-	-	-	-	NH
	Unigene3219	-	-	-	-	NH
	Unigene32250	-	-	-	-	NH
	Unigene32254	-	-	-	-	NH
	Unigene32264	-	-	-	-	NH
	Unigene32316	-	-	-	-	NH
	Unigene3237	-	-	-	-	NH
	Unigene32390	-	-	-	-	NH
	Unigene32478	-	-	-	-	NH
	Unigene32483	-	-	-	-	NH
	Unigene32572	-	-	-	-	NH
	Unigene32691	-	-	-	-	NH
	Unigene32747	-	-	-	-	NH
	Unigene32875	-	-	-	-	NH
	Unigene32891	-	-	-	-	NH
	Unigene32917	-	-	-	-	NH
	Unigene33083	-	-	-	-	NH
	Unigene33106	-	-	-	-	NH
	Unigene33166	-	-	-	-	NH
	Unigene33218	-	-	-	-	NH
	Unigene33225	-	-	-	-	NH
	Unigene33281	-	-	-	-	NH
	Unigene33334	-	-	-	-	NH
	Unigene33397	-	-	-	-	NH
	Unigene3351	-	-	-	-	NH
	Unigene33528	-	-	-	-	NH
	Unigene33598	-	-	-	-	NH
	Unigene3377	-	-	-	-	NH
	Unigene33907	-	-	-	-	NH
	Unigene33965	-	-	-	-	NH
	Unigene34018	-	-	-	-	NH
	Unigene3409	-	-	-	-	NH
	Unigene34224	-	-	-	-	NH
	Unigene34258	-	-	-	-	NH
	Unigene34262	-	-	-	-	NH
	Unigene34321	-	-	-	-	NH
	Unigene34326	-	-	-	-	NH
	Unigene34371	-	-	-	-	NH
	Unigene34392	-	-	-	-	NH
	Unigene34449	-	-	-	-	NH
	Unigene34513	-	-	-	-	NH
	Unigene34689	-	-	-	-	NH
	Unigene3470	-	-	-	-	NH
	Unigene34790	-	-	-	-	NH
	Unigene34976	-	-	-	-	NH
	Unigene35076	-	-	-	-	NH
	Unigene35216	-	-	-	-	NH
	Unigene35226	-	-	-	-	NH
	Unigene35229	-	-	-	-	NH
	Unigene35265	-	-	-	-	NH
	Unigene35323	-	-	-	-	NH
	Unigene35349	-	-	-	-	NH
	Unigene35399	-	-	-	-	NH
	Unigene35437	-	-	-	-	NH
	Unigene35521	-	-	-	-	NH
	Unigene35659	-	-	-	-	NH
	Unigene35844	-	-	-	-	NH
	Unigene36337	-	-	-	-	NH
	Unigene36528	-	-	-	-	NH
	Unigene36669	-	-	-	-	NH
	Unigene36727	-	-	-	-	NH
	Unigene36921	-	-	-	-	NH
	Unigene37067	-	-	-	-	NH
	Unigene37136	-	-	-	-	NH
	Unigene37160	-	-	-	-	NH
	Unigene37187	-	-	-	-	NH
	Unigene37199	-	-	-	-	NH
	Unigene3722	-	-	-	-	NH
	Unigene37342	-	-	-	-	NH
	Unigene37442	-	-	-	-	NH
	Unigene37473	-	-	-	-	NH
	Unigene37482	-	-	-	-	NH
	Unigene37540	-	-	-	-	NH
	Unigene37555	-	-	-	-	NH
	Unigene37600	-	-	-	-	NH
	Unigene3765	-	-	-	-	NH
	Unigene37668	-	-	-	-	NH
	Unigene37701	-	-	-	-	NH
	Unigene37731	-	-	-	-	NH
	Unigene37757	-	-	-	-	NH
	Unigene37784	-	-	-	-	NH
	Unigene37920	-	-	-	-	NH
	Unigene37961	-	-	-	-	NH
	Unigene38055	-	-	-	-	NH
	Unigene38103	-	-	-	-	NH
	Unigene38140	-	-	-	-	NH
	Unigene38227	-	-	-	-	NH
	Unigene3828	-	-	-	-	NH
	Unigene38324	-	-	-	-	NH
	Unigene38370	-	-	-	-	NH
	Unigene38507	-	-	-	-	NH
	Unigene38538	-	-	-	-	NH
	Unigene38723	-	-	-	-	NH
	Unigene38852	-	-	-	-	NH
	Unigene38874	-	-	-	-	NH
	Unigene38994	-	-	-	-	NH
	Unigene3911	-	-	-	-	NH
	Unigene39260	-	-	-	-	NH
	Unigene39404	-	-	-	-	NH
	Unigene39456	-	-	-	-	NH
	Unigene39516	-	-	-	-	NH
	Unigene3955	-	-	-	-	NH
	Unigene39956	-	-	-	-	NH
	Unigene40041	-	-	-	-	NH
	Unigene40119	-	-	-	-	NH
	Unigene40256	-	-	-	-	NH
	Unigene4026	-	-	-	-	NH
	Unigene40310	-	-	-	-	NH
	Unigene40525	-	-	-	-	NH
	Unigene4053	-	-	-	-	NH
	Unigene40584	-	-	-	-	NH
	Unigene40599	-	-	-	-	NH
	Unigene40702	-	-	-	-	NH
	Unigene4072	-	-	-	-	NH
	Unigene40949	-	-	-	-	NH
	Unigene41044	-	-	-	-	NH
	Unigene41120	-	-	-	-	NH
	Unigene41270	-	-	-	-	NH
	Unigene41327	-	-	-	-	NH
	Unigene41355	-	-	-	-	NH
	Unigene41523	-	-	-	-	NH
	Unigene41576	-	-	-	-	NH
	Unigene41592	-	-	-	-	NH
	Unigene41742	-	-	-	-	NH
	Unigene41757	-	-	-	-	NH
	Unigene41878	-	-	-	-	NH
	Unigene41951	-	-	-	-	NH
	Unigene42034	-	-	-	-	NH
	Unigene42073	-	-	-	-	NH
	Unigene42242	-	-	-	-	NH
	Unigene42280	-	-	-	-	NH
	Unigene4244	-	-	-	-	NH
	Unigene42445	-	-	-	-	NH
	Unigene42511	-	-	-	-	NH
	Unigene42554	-	-	-	-	NH
	Unigene42591	-	-	-	-	NH
	Unigene42602	-	-	-	-	NH
	Unigene42662	-	-	-	-	NH
	Unigene42744	-	-	-	-	NH
	Unigene42788	-	-	-	-	NH
	Unigene4281	-	-	-	-	NH
	Unigene42817	-	-	-	-	NH
	Unigene43172	-	-	-	-	NH
	Unigene43188	-	-	-	-	NH
	Unigene43432	-	-	-	-	NH
	Unigene43547	-	-	-	-	NH
	Unigene43625	-	-	-	-	NH
	Unigene43626	-	-	-	-	NH
	Unigene43697	-	-	-	-	NH
	Unigene4376	-	-	-	-	NH
	Unigene43955	-	-	-	-	NH
	Unigene44299	-	-	-	-	NH
	Unigene44325	-	-	-	-	NH
	Unigene44456	-	-	-	-	NH
	Unigene44492	-	-	-	-	NH
	Unigene44533	-	-	-	-	NH
	Unigene44550	-	-	-	-	NH
	Unigene44575	-	-	-	-	NH
	Unigene44598	-	-	-	-	NH
	Unigene44633	-	-	-	-	NH
	Unigene44782	-	-	-	-	NH
	Unigene44814	-	-	-	-	NH
	Unigene44906	-	-	-	-	NH
	Unigene45303	-	-	-	-	NH
	Unigene45535	-	-	-	-	NH
	Unigene45564	-	-	-	-	NH
	Unigene45606	-	-	-	-	NH
	Unigene4572	-	-	-	-	NH
	Unigene45809	-	-	-	-	NH
	Unigene45836	-	-	-	-	NH
	Unigene45843	-	-	-	-	NH
	Unigene45955	-	-	-	-	NH
	Unigene45975	-	-	-	-	NH
	Unigene46423	-	-	-	-	NH
	Unigene4645	-	-	-	-	NH
	Unigene46644	-	-	-	-	NH
	Unigene46688	-	-	-	-	NH
	Unigene4673	-	-	-	-	NH
	Unigene46840	-	-	-	-	NH
	Unigene47013	-	-	-	-	NH
	Unigene47031	-	-	-	-	NH
	Unigene47123	-	-	-	-	NH
	Unigene4716	-	-	-	-	NH
	Unigene47175	-	-	-	-	NH
	Unigene47201	-	-	-	-	NH
	Unigene47298	-	-	-	-	NH
	Unigene47302	-	-	-	-	NH
	Unigene4755	-	-	-	-	NH
	Unigene47626	-	-	-	-	NH
	Unigene47804	-	-	-	-	NH
	Unigene47875	-	-	-	-	NH
	Unigene47909	-	-	-	-	NH
	Unigene47995	-	-	-	-	NH
	Unigene48171	-	-	-	-	NH
	Unigene48175	-	-	-	-	NH
	Unigene48297	-	-	-	-	NH
	Unigene48438	-	-	-	-	NH
	Unigene48737	-	-	-	-	NH
	Unigene4884	-	-	-	-	NH
	Unigene48974	-	-	-	-	NH
	Unigene49021	-	-	-	-	NH
	Unigene49039	-	-	-	-	NH
	Unigene49488	-	-	-	-	NH
	Unigene49541	-	-	-	-	NH
	Unigene4958	-	-	-	-	NH
	Unigene49585	-	-	-	-	NH
	Unigene49651	-	-	-	-	NH
	Unigene49662	-	-	-	-	NH
	Unigene49791	-	-	-	-	NH
	Unigene49880	-	-	-	-	NH
	Unigene4995	-	-	-	-	NH
	Unigene50126	-	-	-	-	NH
	Unigene50142	-	-	-	-	NH
	Unigene50229	-	-	-	-	NH
	Unigene50288	-	-	-	-	NH
	Unigene50610	-	-	-	-	NH
	Unigene50631	-	-	-	-	NH
	Unigene50656	-	-	-	-	NH
	Unigene50675	-	-	-	-	NH
	Unigene5073	-	-	-	-	NH
	Unigene50879	-	-	-	-	NH
	Unigene5090	-	-	-	-	NH
	Unigene50905	-	-	-	-	NH
	Unigene51009	-	-	-	-	NH
	Unigene5105	-	-	-	-	NH
	Unigene51053	-	-	-	-	NH
	Unigene51226	-	-	-	-	NH
	Unigene51296	-	-	-	-	NH
	Unigene51577	-	-	-	-	NH
	Unigene51673	-	-	-	-	NH
	Unigene51779	-	-	-	-	NH
	Unigene51862	-	-	-	-	NH
	Unigene52019	-	-	-	-	NH
	Unigene52082	-	-	-	-	NH
	Unigene52121	-	-	-	-	NH
	Unigene52526	-	-	-	-	NH
	Unigene52583	-	-	-	-	NH
	Unigene5262	-	-	-	-	NH
	Unigene5271	-	-	-	-	NH
	Unigene52712	-	-	-	-	NH
	Unigene53217	-	-	-	-	NH
	Unigene53296	-	-	-	-	NH
	Unigene53759	-	-	-	-	NH
	Unigene53851	-	-	-	-	NH
	Unigene5386	-	-	-	-	NH
	Unigene53966	-	-	-	-	NH
	Unigene53973	-	-	-	-	NH
	Unigene54157	-	-	-	-	NH
	Unigene54228	-	-	-	-	NH
	Unigene54365	-	-	-	-	NH
	Unigene54402	-	-	-	-	NH
	Unigene54582	-	-	-	-	NH
	Unigene54640	-	-	-	-	NH
	Unigene54660	-	-	-	-	NH
	Unigene54885	-	-	-	-	NH
	Unigene55055	-	-	-	-	NH
	Unigene55313	-	-	-	-	NH
	Unigene55351	-	-	-	-	NH
	Unigene55387	-	-	-	-	NH
	Unigene55596	-	-	-	-	NH
	Unigene55606	-	-	-	-	NH
	Unigene5566	-	-	-	-	NH
	Unigene55834	-	-	-	-	NH
	Unigene55852	-	-	-	-	NH
	Unigene56105	-	-	-	-	NH
	Unigene56112	-	-	-	-	NH
	Unigene56434	-	-	-	-	NH
	Unigene56624	-	-	-	-	NH
	Unigene567	-	-	-	-	NH
	Unigene56843	-	-	-	-	NH
	Unigene56885	-	-	-	-	NH
	Unigene56895	-	-	-	-	NH
	Unigene57146	-	-	-	-	NH
	Unigene57258	-	-	-	-	NH
	Unigene57268	-	-	-	-	NH
	Unigene57281	-	-	-	-	NH
	Unigene57340	-	-	-	-	NH
	Unigene57374	-	-	-	-	NH
	Unigene57522	-	-	-	-	NH
	Unigene57796	-	-	-	-	NH
	Unigene58015	-	-	-	-	NH
	Unigene58029	-	-	-	-	NH
	Unigene58046	-	-	-	-	NH
	Unigene58345	-	-	-	-	NH
	Unigene58381	-	-	-	-	NH
	Unigene58457	-	-	-	-	NH
	Unigene58480	-	-	-	-	NH
	Unigene5853	-	-	-	-	NH
	Unigene58538	-	-	-	-	NH
	Unigene5856	-	-	-	-	NH
	Unigene58663	-	-	-	-	NH
	Unigene5899	-	-	-	-	NH
	Unigene59200	-	-	-	-	NH
	Unigene59566	-	-	-	-	NH
	Unigene59763	-	-	-	-	NH
	Unigene5989	-	-	-	-	NH
	Unigene59988	-	-	-	-	NH
	Unigene60036	-	-	-	-	NH
	Unigene60427	-	-	-	-	NH
	Unigene60543	-	-	-	-	NH
	Unigene60570	-	-	-	-	NH
	Unigene60829	-	-	-	-	NH
	Unigene61121	-	-	-	-	NH
	Unigene61264	-	-	-	-	NH
	Unigene61458	-	-	-	-	NH
	Unigene61595	-	-	-	-	NH
	Unigene61761	-	-	-	-	NH
	Unigene61764	-	-	-	-	NH
	Unigene61776	-	-	-	-	NH
	Unigene61835	-	-	-	-	NH
	Unigene61937	-	-	-	-	NH
	Unigene62141	-	-	-	-	NH
	Unigene62249	-	-	-	-	NH
	Unigene6245	-	-	-	-	NH
	Unigene62642	-	-	-	-	NH
	Unigene62801	-	-	-	-	NH
	Unigene6284	-	-	-	-	NH
	Unigene6310	-	-	-	-	NH
	Unigene63222	-	-	-	-	NH
	Unigene6331	-	-	-	-	NH
	Unigene63559	-	-	-	-	NH
	Unigene63748	-	-	-	-	NH
	Unigene63792	-	-	-	-	NH
	Unigene63877	-	-	-	-	NH
	Unigene63898	-	-	-	-	NH
	Unigene63961	-	-	-	-	NH
	Unigene64036	-	-	-	-	NH
	Unigene64131	-	-	-	-	NH
	Unigene64257	-	-	-	-	NH
	Unigene64364	-	-	-	-	NH
	Unigene64371	-	-	-	-	NH
	Unigene64678	-	-	-	-	NH
	Unigene64816	-	-	-	-	NH
	Unigene65518	-	-	-	-	NH
	Unigene65612	-	-	-	-	NH
	Unigene66182	-	-	-	-	NH
	Unigene66189	-	-	-	-	NH
	Unigene6621	-	-	-	-	NH
	Unigene66351	-	-	-	-	NH
	Unigene66397	-	-	-	-	NH
	Unigene66613	-	-	-	-	NH
	Unigene66697	-	-	-	-	NH
	Unigene66850	-	-	-	-	NH
	Unigene6720	-	-	-	-	NH
	Unigene67370	-	-	-	-	NH
	Unigene67666	-	-	-	-	NH
	Unigene68160	-	-	-	-	NH
	Unigene68660	-	-	-	-	NH
	Unigene68860	-	-	-	-	NH
	Unigene6890	-	-	-	-	NH
	Unigene69001	-	-	-	-	NH
	Unigene69017	-	-	-	-	NH
	Unigene69949	-	-	-	-	NH
	Unigene70067	-	-	-	-	NH
	Unigene70125	-	-	-	-	NH
	Unigene71265	-	-	-	-	NH
	Unigene71791	-	-	-	-	NH
	Unigene7238	-	-	-	-	NH
	Unigene7296	-	-	-	-	NH
	Unigene7400	-	-	-	-	NH
	Unigene7449	-	-	-	-	NH
	Unigene7547	-	-	-	-	NH
	Unigene7734	-	-	-	-	NH
	Unigene777	-	-	-	-	NH
	Unigene7840	-	-	-	-	NH
	Unigene7846	-	-	-	-	NH
	Unigene7858	-	-	-	-	NH
	Unigene7892	-	-	-	-	NH
	Unigene7908	-	-	-	-	NH
	Unigene7946	-	-	-	-	NH
	Unigene8166	-	-	-	-	NH
	Unigene8233	-	-	-	-	NH
	Unigene8476	-	-	-	-	NH
	Unigene8629	-	-	-	-	NH
	Unigene8632	-	-	-	-	NH
	Unigene8753	-	-	-	-	NH
	Unigene8829	-	-	-	-	NH
	Unigene925	-	-	-	-	NH
	Unigene9328	-	-	-	-	NH
	Unigene9403	-	-	-	-	NH
	Unigene941	-	-	-	-	NH
	Unigene9518	-	-	-	-	NH
	Unigene9519	-	-	-	-	NH
	Unigene9577	-	-	-	-	NH
	Unigene9626	-	-	-	-	NH
	Unigene9751	-	-	-	-	NH
	Unigene9802	-	-	-	-	NH
	Unigene9858	-	-	-	-	NH
	Unigene9873	-	-	-	-	NH
	Unigene9905	-	-	-	-	NH
Petals	Unigene11075	AT5G35550	90.32	5e-13	75.8	EE
	Unigene11717	AT1G43620	78.32	1e-59	232	EE
	Unigene11964	AT1G49430	90	2e-06	48.1	EE
	Unigene12178	AT1G57590	79.31	9e-29	129	EE
	Unigene12639	AT5G28300	89.04	8e-15	81.8	EE
	Unigene12788	AT3G60030	86.3	4e-10	65.9	EE
	Unigene1438	AT2G25050	78.73	1e-13	79.8	EE
	Unigene15238	AT4G28780	80.92	1e-11	71.9	EE
	Unigene16971	AT3G22830	85.29	5e-15	83.8	EE
	Unigene17504	AT2G41540	80.83	7e-131	468	EE
	Unigene18041	AT4G37080	83.9	5e-40	167	EE
	Unigene19088	AT5G47820	86.25	2e-12	71.9	EE
	Unigene21919	AT5G25320	85.92	2e-09	61.9	EE
	Unigene22815	AT5G28300	93.55	1e-06	46.1	EE
	Unigene22894	ATMG00900	83.04	1e-10	65.9	EE
	Unigene23287	AT1G69440	93.48	2e-09	61.9	EE
	Unigene23555	AT2G03710	85	2e-24	111	EE
	Unigene2424	AT1G15360	96.77	2e-22	107	EE
	Unigene26384	AT3G16170	90.74	3e-11	67.9	EE
	Unigene28536	AT4G32730	95.45	2e-12	71.9	EE
	Unigene28821	AT5G43760	91.67	5e-10	63.9	EE
	Unigene30683	AT2G41830	86.55	2e-22	105	EE
	Unigene30823	AT4G13710	81.46	2e-18	91.7	EE
	Unigene31756	AT5G28300	88.68	3e-08	58	EE
	Unigene32438	AT5G13930	85.54	9e-12	69.9	EE
	Unigene33016	AT5G13930	82.56	2e-06	52	EE
	Unigene33058	AT3G16170	84.62	8e-06	50.1	EE
	Unigene3336	AT2G46990	90.7	2e-06	54	EE
	Unigene33684	AT4G00400	84.21	4e-20	97.6	EE
	Unigene35150	AT1G75860	96.15	6e-06	44.1	EE
	Unigene3530	AT5G10670	94.59	4e-08	58	EE
	Unigene36178	AT4G28110	86.54	2e-19	95.6	EE
	Unigene37153	AT4G00950	100	9e-06	50.1	EE
	Unigene3725	AT1G48480	92.5	4e-07	48.1	EE
	Unigene37447	AT2G41540	79.72	6e-07	54	EE
	Unigene37557	AT2G25220	96.55	9e-06	50.1	EE
	Unigene37932	AT5G47820	85.33	2e-09	61.9	EE
	Unigene38196	AT5G16020	100	4e-08	58	EE
	Unigene38313	AT1G48480	100	4e-07	48.1	EE
	Unigene4113	AT3G05750	100	4e-09	61.9	EE
	Unigene44143	AT5G55040	100	4e-08	58	EE
	Unigene47850	AT5G25900	100	9e-06	44.1	EE
	Unigene48025	AT2G26640	92.86	1e-08	60	EE
	Unigene48392	AT5G10100	96.77	8e-07	54	EE
	Unigene48527	AT3G02170	100	9e-06	44.1	EE
	Unigene49137	AT1G15360	83.2	4e-15	81.8	EE
	Unigene49372	AT5G59840	92.16	1e-11	69.9	EE
	Unigene50060	AT3G21230	87.5	3e-12	71.9	EE
	Unigene51019	AT3G24800	100	6e-06	50.1	EE
	Unigene51300	AT5G28300	83.72	1e-08	60	EE
	Unigene51525	AT2G38110	94.44	2e-07	56	EE
	Unigene53287	AT3G16170	82.76	4e-12	71.9	EE
	Unigene5342	AT2G30280	97.5	3e-12	71.9	EE
	Unigene53910	AT5G47820	79.69	4e-12	71.9	EE
	Unigene54190	AT5G03640	86.75	7e-14	77.8	EE
	Unigene55393	AT3G21270	85.57	4e-15	81.8	EE
	Unigene56273	AT2G44770	85	1e-09	63.9	EE
	Unigene56544	AT4G23290	87.84	3e-13	75.8	EE
	Unigene58278	AT5G47820	86.11	1e-09	63.9	EE
	Unigene58634	AT2G16920	90.38	1e-09	63.9	EE
	Unigene58758	AT5G62670	84.68	3e-19	95.6	EE
	Unigene59080	AT5G49215	83.65	5e-12	71.9	EE
	Unigene5948	AT5G66540	96.77	2e-06	54	EE
	Unigene60732	AT1G76580	94.29	1e-06	54	EE
	Unigene60952	AT3G02170	88	5e-06	52	EE
	Unigene61253	AT2G44500	87.23	1e-31	137	EE
	Unigene62958	AT1G35515	83.19	2e-12	73.8	EE
	Unigene63015	AT5G47820	84.98	6e-46	184	EE
	Unigene63100	AT5G42750	84.75	4e-06	46.1	EE
	Unigene63283	AT1G76878	81.9	2e-09	63.9	EE
	Unigene63757	AT2G45650	89.36	2e-06	54	EE
	Unigene64037	AT1G49430	88.46	4e-07	56	EE
	Unigene64878	AT5G47820	85.67	6e-74	278	EE
	Unigene66145	AT5G45950	100	5e-06	46.1	EE
	Unigene66162	AT3G02110	91.07	8e-12	71.9	EE
	Unigene66639	AT2G47070	83.55	1e-32	141	EE
	Unigene66663	AT1G17260	79.33	2e-52	206	EE
	Unigene66678	AT2G45650	87.36	5e-44	178	EE
	Unigene67984	AT1G49430	93.75	2e-06	48.1	EE
	Unigene6837	AT5G61790	88.89	2e-11	69.9	EE
	Unigene68684	AT4G23130	84.16	3e-12	73.8	EE
	Unigene68726	AT1G65060	82.88	4e-11	69.9	EE
	Unigene68777	AT4G10770	87.84	7e-13	75.8	EE
	Unigene69256	AT2G41540	82.79	2e-75	283	EE
	Unigene6931	AT2G21420	87.5	5e-12	71.9	EE
	Unigene69390	AT1G17260	81.24	1e-88	327	EE
	Unigene69637	AT4G03390	96.67	5e-06	52	EE
	Unigene70069	AT3G13540	86.14	3e-34	147	EE
	Unigene70151	AT1G54820	89.23	3e-12	73.8	EE
	Unigene70188	AT3G04290	81	9e-19	95.6	EE
	Unigene70356	AT2G46870	80.89	1e-24	115	EE
	Unigene71176	AT1G68530	80.77	1e-18	95.6	EE
	Unigene756	AT5G15310	82.89	9e-62	238	EE
	Unigene8257	AT1G48000	85.09	6e-29	129	EE
	Unigene8389	AT3G22800	96.43	6e-19	95.6	EE
	Unigene8660	AT5G13930	91.43	3e-06	46.1	EE
	Unigene9538	AT4G26590	87.93	4e-08	60	EE
	Unigene10117	AT5G41340	85.05	5e-16	85.7	DE
	Unigene10599	AT5G09300	81.57	4e-64	246	DE
	Unigene10779	AT1G52570	80	2e-16	85.7	DE
	Unigene1094	AT2G30800	82.5	1e-32	143	DE
	Unigene11288	AT5G50170	83	3e-09	63.9	DE
	Unigene11318	AT2G42740	97.92	1e-16	87.7	DE
	Unigene11622	AT5G45900	87.32	5e-11	69.9	DE
	Unigene11661	AT5G66310	80.54	4e-34	147	DE
	Unigene11852	AT3G09440	83.23	2e-20	101	DE
	Unigene12216	AT1G56410	84.96	6e-22	105	DE
	Unigene12622	AT4G39810	82.19	5e-15	83.8	DE
	Unigene12865	AT4G24280	89.29	8e-10	63.9	DE
	Unigene13010	AT4G00230	81.97	3e-10	67.9	DE
	Unigene13248	AT5G48060	88	3e-06	52	DE
	Unigene13303	AT1G28680	81.91	4e-06	52	DE
	Unigene13783	AT3G18750	78.63	9e-12	71.9	DE
	Unigene13877	AT3G10550	86.49	1e-10	67.9	DE
	Unigene13960	AT4G34810	87.5	2e-07	56	DE
	Unigene14160	AT3G63310	83.67	2e-10	67.9	DE
	Unigene14246	AT3G29030	96.88	2e-07	56	DE
	Unigene14362	AT5G12350	85	2e-28	127	DE
	Unigene14746	AT3G01120	84.34	6e-09	61.9	DE
	Unigene15110	AT3G12710	96.55	7e-06	50.1	DE
	Unigene15202	AT4G39810	82.11	3e-11	69.9	DE
	Unigene15714	AT4G35100	86.03	1e-61	238	DE
	Unigene15832	AT1G52570	78.72	5e-19	97.6	DE
	Unigene15863	AT3G26560	80.46	5e-13	75.8	DE
	Unigene1609	AT3G12203	82.35	3e-11	69.9	DE
	Unigene16227	AT1G13210	84.81	7e-27	123	DE
	Unigene16549	AT3G12580	83.57	7e-33	141	DE
	Unigene16865	AT1G15500	79.85	2e-123	444	DE
	Unigene16872	AT4G30940	78.77	5e-52	206	DE
	Unigene16928	AT5G37180	82.39	6e-21	103	DE
	Unigene16960	AT2G32120	85.92	2e-08	61.9	DE
	Unigene17003	AT1G16540	81.79	7e-39	163	DE
	Unigene17043	AT5G37180	83.25	2e-31	137	DE
	Unigene17093	AT4G35880	82.39	6e-15	83.8	DE
	Unigene17375	AT3G09630	85.23	1e-11	71.9	DE
	Unigene17422	AT1G58370	89.55	5e-13	77.8	DE
	Unigene17594	AT2G27530	90.74	1e-10	67.9	DE
	Unigene17773	AT3G17730	81.05	4e-48	192	DE
	Unigene18129	AT3G22400	93.62	1e-10	69.9	DE
	Unigene18151	AT1G22190	80.6	2e-08	60	DE
	Unigene18158	AT3G13920	85.71	6e-08	60	DE
	Unigene18877	AT1G47380	93.75	1e-05	48.1	DE
	Unigene18901	AT1G77000	82.73	2e-11	67.9	DE
	Unigene1894	AT5G08670	90.91	1e-07	56	DE
	Unigene19039	AT4G34990	85.71	1e-05	48.1	DE
	Unigene19317	AT1G59910	92.5	1e-05	48.1	DE
	Unigene19417	AT4G02340	96.43	1e-05	48.1	DE
	Unigene19445	AT3G53402	89.58	9e-08	56	DE
	Unigene19747	AT3G14050	87.69	1e-10	65.9	DE
	Unigene19915	AT1G01050	96.55	6e-06	50.1	DE
	Unigene20630	AT1G03090	81.51	2e-09	61.9	DE
	Unigene21345	AT1G70290	85.07	4e-07	54	DE
	Unigene214	AT3G62700	81.72	8e-06	50.1	DE
	Unigene21479	AT3G04910	95.12	1e-10	65.9	DE
	Unigene21574	AT5G23660	83.7	4e-10	63.9	DE
	Unigene21617	AT1G03090	84.43	2e-18	91.7	DE
	Unigene21776	AT5G46180	91.53	3e-14	77.8	DE
	Unigene22039	AT1G45545	92.68	3e-08	58	DE
	Unigene22372	AT5G28080	100	3e-08	58	DE
	Unigene22437	AT4G16130	86.9	7e-15	79.8	DE
	Unigene22496	AT1G28620	96.67	2e-06	52	DE
	Unigene22644	AT1G52570	84.62	7e-15	79.8	DE
	Unigene22660	AT5G63530	96.55	6e-06	50.1	DE
	Unigene22841	AT3G04910	85.71	4e-32	137	DE
	Unigene23429	AT4G22920	81.25	4e-10	63.9	DE
	Unigene23533	AT5G50000	85.63	2e-33	141	DE
	Unigene23540	AT5G22920	84.07	2e-15	81.8	DE
	Unigene24641	AT2G01420	88.89	8e-21	99.6	DE
	Unigene24668	AT1G14530	96.55	7e-06	50.1	DE
	Unigene25322	AT2G01690	97.73	8e-15	79.8	DE
	Unigene25392	AT4G00550	83.7	5e-10	63.9	DE
	Unigene25435	AT1G76878	82.35	7e-06	50.1	DE
	Unigene26092	AT1G23870	90.24	7e-06	50.1	DE
	Unigene26511	AT3G60130	92.68	3e-08	58	DE
	Unigene2663	AT4G27910	86.36	8e-31	133	DE
	Unigene27007	AT1G29400	82.93	3e-14	77.8	DE
	Unigene27393	AT1G78420	96.67	2e-06	52	DE
	Unigene27416	AT3G50180	87.72	3e-08	58	DE
	Unigene27599	AT5G16230	100	7e-06	50.1	DE
	Unigene27889	AT4G00400	85.54	8e-12	69.9	DE
	Unigene281	AT1G78955	80.77	1e-15	83.8	DE
	Unigene28657	AT5G56360	94.12	2e-06	52	DE
	Unigene28864	AT1G65010	90.24	7e-06	50.1	DE
	Unigene2888	AT3G04910	86.77	5e-42	170	DE
	Unigene28910	AT4G29240	96.55	7e-06	50.1	DE
	Unigene29275	AT1G45130	87.5	3e-17	87.7	DE
	Unigene29426	AT3G13750	80.1	3e-14	77.8	DE
	Unigene29478	AT2G43400	83.45	2e-15	81.8	DE
	Unigene29744	AT2G43400	79.74	3e-08	58	DE
	Unigene29811	AT5G51750	89.13	2e-06	52	DE
	Unigene30127	AT1G22380	87.32	8e-12	69.9	DE
	Unigene30525	AT5G53970	83.87	4e-17	87.7	DE
	Unigene30757	AT5G63530	83.75	1e-07	56	DE
	Unigene30877	AT2G28470	80.75	5e-13	73.8	DE
	Unigene31391	AT1G05960	85.29	1e-07	56	DE
	Unigene31480	AT4G14070	81.77	4e-20	97.6	DE
	Unigene31612	AT3G16910	84.69	1e-13	75.8	DE
	Unigene31721	AT3G53180	91.84	1e-10	65.9	DE
	Unigene32380	AT4G31180	100	5e-07	54	DE
	Unigene32522	AT2G18950	91.3	8e-09	60	DE
	Unigene32648	AT2G26730	87.1	8e-09	60	DE
	Unigene32652	AT2G29070	93.1	6e-16	83.8	DE
	Unigene32757	AT3G28857	88.24	2e-12	71.9	DE
	Unigene32761	AT1G27980	86.54	2e-19	95.6	DE
	Unigene32957	AT3G26840	92.86	8e-09	60	DE
	Unigene33081	AT5G20620	84.57	7e-34	143	DE
	Unigene33954	AT4G20340	91.11	3e-08	58	DE
	Unigene34694	AT5G54070	87.5	1e-07	56	DE
	Unigene34831	AT4G16130	82.58	6e-19	93.7	DE
	Unigene34852	AT3G01780	96.55	8e-06	50.1	DE
	Unigene34953	AT3G62700	85.25	1e-20	99.6	DE
	Unigene34954	AT2G43400	86.15	3e-08	58	DE
	Unigene35027	AT1G08510	92.06	2e-16	85.7	DE
	Unigene35528	AT5G20885	100	9e-06	50.1	DE
	Unigene35586	AT5G13490	86.59	9e-09	60	DE
	Unigene3571	AT3G24080	88	9e-06	52	DE
	Unigene35980	AT1G27320	89.62	7e-28	123	DE
	Unigene36270	AT2G47110	91.07	2e-12	71.9	DE
	Unigene36328	AT2G47070	96.55	9e-06	50.1	DE
	Unigene36546	AT1G76878	90.74	4e-11	67.9	DE
	Unigene36621	AT5G48970	100	9e-06	50.1	DE
	Unigene36910	AT5G02270	83.82	3e-27	121	DE
	Unigene375	AT1G76880	81.01	4e-16	85.7	DE
	Unigene37515	AT3G17660	81.94	1e-14	79.8	DE
	Unigene37581	AT2G28470	82.88	1e-11	69.9	DE
	Unigene37732	AT2G18450	83.44	2e-22	105	DE
	Unigene3795	AT5G56010	80.33	2e-13	77.8	DE
	Unigene38639	AT1G27320	86.76	5e-29	127	DE
	Unigene39092	AT1G47380	94.12	2e-06	52	DE
	Unigene39170	AT3G04030	85.15	3e-15	81.8	DE
	Unigene39933	AT1G80310	92.11	2e-06	52	DE
	Unigene4030	AT5G40670	89.83	3e-11	69.9	DE
	Unigene40484	AT5G61960	84.62	1e-14	79.8	DE
	Unigene40715	AT2G18950	82.89	2e-19	95.6	DE
	Unigene40944	AT1G11910	87.84	2e-13	75.8	DE
	Unigene410	AT2G28470	86.47	6e-47	188	DE
	Unigene41220	AT1G04710	83.01	3e-30	131	DE
	Unigene41453	AT5G66760	82.46	2e-16	85.7	DE
	Unigene41564	AT4G36920	85.08	2e-50	198	DE
	Unigene41618	AT3G01650	80.24	8e-22	103	DE
	Unigene41719	AT2G30560	90.74	1e-08	60	DE
	Unigene41728	AT2G29130	93.55	3e-18	91.7	DE
	Unigene42030	AT3G23410	84.52	7e-10	63.9	DE
	Unigene424	AT1G02850	90.91	1e-19	97.6	DE
	Unigene42491	AT2G30230	100	4e-08	58	DE
	Unigene42606	AT3G10410	81.51	3e-09	61.9	DE
	Unigene42807	AT2G44120	86.36	1e-08	60	DE
	Unigene42920	AT2G39800	82.05	2e-10	65.9	DE
	Unigene43114	AT5G19090	94.29	7e-07	54	DE
	Unigene43278	AT2G28470	93.62	1e-11	69.9	DE
	Unigene4348	AT1G31480	82.61	4e-07	56	DE
	Unigene43919	AT1G55510	82.72	5e-26	117	DE
	Unigene43971	AT1G45130	82.19	8e-16	83.8	DE
	Unigene44255	AT2G26570	82.86	5e-17	87.7	DE
	Unigene44273	AT3G05030	87.84	2e-13	75.8	DE
	Unigene4435	AT2G02040	90.91	1e-07	56	DE
	Unigene44670	AT3G55610	81.58	1e-20	99.6	DE
	Unigene44766	AT4G36360	83.65	3e-12	71.9	DE
	Unigene44845	AT4G39140	96.55	5e-06	50.1	DE
	Unigene44878	AT5G60800	92.11	3e-06	52	DE
	Unigene44904	AT5G19420	82.32	2e-22	105	DE
	Unigene45466	AT1G27980	83.49	6e-35	147	DE
	Unigene45516	AT1G29400	80	2e-13	75.8	DE
	Unigene46003	AT1G67800	83.76	3e-15	81.8	DE
	Unigene46093	AT1G29400	82.11	6e-23	107	DE
	Unigene46279	AT1G51500	88.46	2e-07	56	DE
	Unigene46414	AT4G17080	83.21	2e-16	85.7	DE
	Unigene46853	AT5G06850	88.89	5e-06	50.1	DE
	Unigene46961	AT5G66760	87.32	2e-69	262	DE
	Unigene47242	AT5G54080	90.41	1e-17	89.7	DE
	Unigene47456	AT4G03960	93.02	3e-09	61.9	DE
	Unigene47619	AT3G12710	83.12	5e-06	50.1	DE
	Unigene47637	AT4G08180	88.39	2e-26	119	DE
	Unigene47693	AT3G50530	90.7	8e-07	54	DE
	Unigene48705	AT3G02515	100	5e-08	58	DE
	Unigene48754	AT1G76878	90.91	1e-11	69.9	DE
	Unigene49411	AT1G11910	84.4	4e-15	81.8	DE
	Unigene49742	AT2G24100	83.92	4e-21	101	DE
	Unigene49822	AT1G78960	82.41	8e-10	63.9	DE
	Unigene50267	AT1G47380	80.06	3e-28	125	DE
	Unigene50525	AT1G17260	82.52	2e-16	85.7	DE
	Unigene50538	AT5G03260	81.08	8e-07	54	DE
	Unigene50554	AT3G06130	86.55	2e-23	109	DE
	Unigene50641	AT2G39890	97.14	3e-09	61.9	DE
	Unigene50845	AT1G78950	84.42	5e-08	58	DE
	Unigene51327	AT1G52880	89.36	9e-07	54	DE
	Unigene51617	AT5G39760	89.02	4e-18	91.7	DE
	Unigene51845	AT5G66760	82.65	1e-48	192	DE
	Unigene52258	AT3G13890	89.36	9e-07	54	DE
	Unigene52302	AT3G01490	81.53	3e-25	115	DE
	Unigene52367	AT1G35580	100	6e-06	50.1	DE
	Unigene5238	AT4G30080	80.47	6e-29	129	DE
	Unigene52523	AT3G50660	79.12	1e-08	60	DE
	Unigene52887	AT5G24940	82.99	1e-18	93.7	DE
	Unigene52997	AT4G17770	85.98	1e-18	93.7	DE
	Unigene532	AT4G26180	85	3e-09	63.9	DE
	Unigene53353	AT4G39350	88.39	2e-26	119	DE
	Unigene53403	AT3G21500	84.38	4e-12	71.9	DE
	Unigene53517	AT2G18950	89.29	1e-09	63.9	DE
	Unigene53540	AT1G32090	83.09	7e-17	87.7	DE
	Unigene53688	AT3G06860	80.1	4e-15	81.8	DE
	Unigene5369	AT1G11330	83.13	1e-06	54	DE
	Unigene53826	AT4G16130	85.46	5e-61	234	DE
	Unigene54225	AT2G18950	94.29	1e-06	54	DE
	Unigene54306	AT1G22610	83.69	7e-20	97.6	DE
	Unigene54560	AT3G22400	89.13	4e-06	52	DE
	Unigene54574	AT4G35240	85.71	1e-06	54	DE
	Unigene54674	AT1G03090	83.46	2e-17	89.7	DE
	Unigene54702	AT1G78440	87.65	4e-15	81.8	DE
	Unigene54805	AT3G04910	82.47	2e-45	182	DE
	Unigene54861	AT3G03310	97.14	4e-09	61.9	DE
	Unigene54933	AT1G69490	82.44	7e-14	77.8	DE
	Unigene55258	AT5G13490	81.95	1e-36	153	DE
	Unigene55413	AT3G15510	79.59	2e-17	89.7	DE
	Unigene55559	AT3G03310	89.29	1e-09	63.9	DE
	Unigene55580	AT1G78950	82.08	2e-08	60	DE
	Unigene55721	AT3G45940	83.14	5e-24	111	DE
	Unigene56268	AT4G18290	90.24	7e-06	50.1	DE
	Unigene56316	AT2G37260	85.86	3e-16	85.7	DE
	Unigene56386	AT3G27540	88.89	2e-11	69.9	DE
	Unigene56466	AT5G03260	80.28	2e-08	60	DE
	Unigene56610	AT1G61580	92.11	4e-06	52	DE
	Unigene56727	AT3G26100	82.35	2e-20	99.6	DE
	Unigene56824	AT1G75710	82.64	1e-46	186	DE
	Unigene56845	AT3G06860	81.95	1e-46	186	DE
	Unigene56993	AT4G10770	84.21	3e-07	56	DE
	Unigene57029	AT4G15560	79.14	8e-23	107	DE
	Unigene57167	AT3G13450	85.82	3e-25	115	DE
	Unigene57491	AT4G33150	80.05	3e-35	149	DE
	Unigene57690	AT5G04200	82.98	2e-08	60	DE
	Unigene57696	AT4G28480	81.12	3e-19	95.6	DE
	Unigene57752	AT3G18750	83.85	5e-18	91.7	DE
	Unigene57784	AT3G52900	90.48	8e-14	77.8	DE
	Unigene58090	AT5G46880	100	5e-06	52	DE
	Unigene58116	AT5G09300	80.86	2e-08	60	DE
	Unigene58198	AT1G75710	88.68	7e-08	58	DE
	Unigene58255	AT4G02710	90.32	3e-13	75.8	DE
	Unigene58365	AT3G10410	81.97	8e-11	67.9	DE
	Unigene58556	AT1G69490	82.2	2e-23	109	DE
	Unigene5864	AT1G53910	88.68	2e-07	58	DE
	Unigene58790	AT3G01120	80.09	3e-16	85.7	DE
	Unigene59456	AT4G37910	87.3	5e-09	61.9	DE
	Unigene59529	AT5G48060	82.88	6e-18	91.7	DE
	Unigene5954	AT4G29210	87.5	2e-07	56	DE
	Unigene59687	AT1G12240	84.68	4e-16	85.7	DE
	Unigene59830	AT5G35180	80.71	1e-09	63.9	DE
	Unigene59943	AT1G11910	88.68	8e-08	58	DE
	Unigene60083	AT3G60970	88.52	3e-10	65.9	DE
	Unigene60130	AT1G27980	79.39	8e-39	161	DE
	Unigene60226	AT4G16130	78.23	1e-09	63.9	DE
	Unigene60358	AT5G16730	86.67	3e-07	56	DE
	Unigene60470	AT5G26731	94.74	2e-08	60	DE
	Unigene60517	AT5G13800	96.55	8e-06	50.1	DE
	Unigene60799	AT1G53430	90.24	9e-06	50.1	DE
	Unigene61070	AT1G66960	90	2e-08	60	DE
	Unigene61129	AT2G17000	86.76	1e-09	63.9	DE
	Unigene61237	AT2G02040	83.12	9e-06	50.1	DE
	Unigene61383	AT4G36360	83.75	3e-07	56	DE
	Unigene61584	AT5G53520	80.74	6e-09	61.9	DE
	Unigene61658	AT4G36360	82.69	2e-42	172	DE
	Unigene61763	AT2G02040	86.96	3e-23	109	DE
	Unigene62076	AT5G41120	92.86	2e-14	79.8	DE
	Unigene62090	AT4G15420	81.98	6e-09	61.9	DE
	Unigene62163	AT5G22420	90.2	6e-09	61.9	DE
	Unigene62279	AT3G44880	80.69	4e-22	105	DE
	Unigene62423	AT1G78950	87.69	4e-10	65.9	DE
	Unigene62477	AT2G30950	81.52	4e-19	95.6	DE
	Unigene62525	AT1G52280	100	9e-08	58	DE
	Unigene62742	AT5G66760	80.18	6e-46	184	DE
	Unigene62753	AT2G31260	79.34	4e-44	178	DE
	Unigene62828	AT2G34340	100	1e-06	54	DE
	Unigene62845	AT1G68020	85.33	6e-09	61.9	DE
	Unigene62861	AT1G68020	89.8	9e-08	58	DE
	Unigene62887	AT1G49580	80.16	1e-37	157	DE
	Unigene63073	AT5G50000	85.16	2e-21	103	DE
	Unigene63239	AT3G17810	82.99	3e-54	212	DE
	Unigene63327	AT5G13800	90.91	4e-07	56	DE
	Unigene63379	AT1G67510	84.42	1e-07	58	DE
	Unigene63783	AT4G15560	82.86	4e-10	65.9	DE
	Unigene63924	AT3G63010	79.93	8e-24	111	DE
	Unigene63959	AT5G14680	84.44	8e-21	101	DE
	Unigene63966	AT1G62520	88.04	5e-19	95.6	DE
	Unigene64035	AT1G24160	85.03	2e-30	133	DE
	Unigene64190	AT5G19420	81.61	7e-18	91.7	DE
	Unigene64627	AT4G15560	78.3	7e-09	61.9	DE
	Unigene64793	AT3G21090	84.78	7e-12	71.9	DE
	Unigene64911	AT2G01420	81.05	1e-31	137	DE
	Unigene64913	AT2G43400	87.91	2e-18	93.7	DE
	Unigene6493	AT1G16030	79.38	4e-102	373	DE
	Unigene64992	AT1G05960	79.46	8e-18	91.7	DE
	Unigene65078	AT5G19420	79.27	1e-44	180	DE
	Unigene65133	AT2G25530	82.08	1e-19	97.6	DE
	Unigene65366	AT4G05160	82.71	8e-15	81.8	DE
	Unigene65432	AT1G16310	81.25	9e-24	111	DE
	Unigene65628	AT2G14520	78.7	1e-44	180	DE
	Unigene65716	AT1G17840	84.02	3e-79	295	DE
	Unigene66025	AT3G49700	94.74	3e-08	60	DE
	Unigene66448	AT1G29520	82.61	5e-07	56	DE
	Unigene66562	AT2G39750	81.66	4e-63	242	DE
	Unigene6660	AT3G55280	94.34	5e-15	81.8	DE
	Unigene66617	AT2G19880	80.97	9e-58	224	DE
	Unigene66777	AT4G04720	87.84	5e-13	75.8	DE
	Unigene66813	AT3G63440	83.46	4e-17	89.7	DE
	Unigene67067	AT1G73370	86.42	2e-12	73.8	DE
	Unigene67161	AT5G41350	87.5	5e-07	56	DE
	Unigene67194	AT5G19420	79.8	8e-37	155	DE
	Unigene67235	AT5G51070	87.32	4e-11	69.9	DE
	Unigene67254	AT2G37585	100	2e-09	63.9	DE
	Unigene67263	AT4G27260	80.41	2e-09	63.9	DE
	Unigene67282	AT5G51070	81.65	2e-15	83.8	DE
	Unigene67687	AT5G19420	79.83	1e-69	264	DE
	Unigene67848	AT1G28110	92	1e-10	67.9	DE
	Unigene67886	AT4G00900	80.52	1e-32	141	DE
	Unigene67996	AT3G51550	86.67	6e-07	56	DE
	Unigene68047	AT1G52560	94.29	2e-06	54	DE
	Unigene68111	AT3G46600	89.8	1e-07	58	DE
	Unigene68120	AT5G12970	85	4e-14	79.8	DE
	Unigene68177	AT2G25530	88.89	4e-20	99.6	DE
	Unigene68187	AT5G24620	84.85	2e-13	77.8	DE
	Unigene68339	AT1G55270	84.77	3e-36	153	DE
	Unigene68435	AT4G01070	92.11	1e-05	52	DE
	Unigene68505	AT4G30190	93.18	3e-09	63.9	DE
	Unigene68677	AT1G72200	87.21	3e-15	83.8	DE
	Unigene68687	AT1G06430	83.46	6e-44	178	DE
	Unigene68811	AT5G28080	79.51	2e-34	147	DE
	Unigene68921	AT5G60680	88.14	1e-08	61.9	DE
	Unigene68929	AT1G21410	92.45	3e-12	73.8	DE
	Unigene69303	AT5G58380	86.76	3e-09	63.9	DE
	Unigene69344	AT1G55760	81.74	1e-08	61.9	DE
	Unigene69367	AT3G16630	86.02	1e-14	81.8	DE
	Unigene69460	AT4G20760	80.71	3e-09	63.9	DE
	Unigene69494	AT1G56070	89.23	3e-12	73.8	DE
	Unigene69645	AT1G68020	83.16	2e-65	250	DE
	Unigene69775	AT4G15420	84.51	3e-06	54	DE
	Unigene69825	AT2G25290	80.39	8e-10	65.9	DE
	Unigene69860	AT3G18440	87.84	8e-13	75.8	DE
	Unigene70052	AT2G28550	81.95	3e-46	186	DE
	Unigene70077	AT1G78240	83.71	4e-27	123	DE
	Unigene70119	AT1G73370	90.2	1e-08	61.9	DE
	Unigene70199	AT1G14330	85.05	9e-16	85.7	DE
	Unigene70257	AT1G66960	100	2e-07	58	DE
	Unigene70259	AT1G29660	86.11	9e-19	95.6	DE
	Unigene70269	AT3G09470	82.76	3e-06	54	DE
	Unigene7028	AT3G01650	88.24	2e-12	71.9	DE
	Unigene70387	AT1G56560	78.12	2e-26	121	DE
	Unigene70690	AT1G27320	84.17	2e-20	101	DE
	Unigene70724	AT1G68400	90.48	6e-06	52	DE
	Unigene7074	AT5G45428	96.67	3e-06	52	DE
	Unigene70805	AT1G70290	81.68	3e-22	107	DE
	Unigene70899	AT3G50660	87.95	1e-15	85.7	DE
	Unigene71004	AT2G43800	100	6e-06	52	DE
	Unigene71079	AT1G29400	77.93	7e-11	69.9	DE
	Unigene71099	AT4G00900	83.24	5e-24	113	DE
	Unigene71157	AT1G73590	80.65	2e-23	111	DE
	Unigene71204	AT5G53020	92	3e-10	67.9	DE
	Unigene7121	AT4G18780	100	2e-10	65.9	DE
	Unigene71243	AT2G19710	86.6	8e-17	89.7	DE
	Unigene71408	AT1G32090	78.24	1e-18	95.6	DE
	Unigene71456	AT1G67510	85.53	6e-70	266	DE
	Unigene71864	AT4G25960	84.19	6e-37	157	DE
	Unigene71877	AT4G35240	82.45	3e-23	111	DE
	Unigene7251	AT1G79270	81.28	1e-18	93.7	DE
	Unigene7643	AT4G38840	90.57	3e-10	65.9	DE
	Unigene7966	AT5G64740	83.18	3e-11	69.9	DE
	Unigene7993	AT5G50170	81.95	1e-12	73.8	DE
	Unigene8033	AT5G53970	96.55	5e-06	50.1	DE
	Unigene8378	AT1G51500	80.75	5e-11	69.9	DE
	Unigene8473	AT1G50940	91.49	3e-09	61.9	DE
	Unigene8588	AT1G80460	84	1e-17	89.7	DE
	Unigene870	AT2G14520	86.36	2e-14	79.8	DE
	Unigene8921	AT2G22100	100	8e-06	50.1	DE
	Unigene9073	AT5G40700	85.19	1e-09	65.9	DE
	Unigene9147	AT1G73370	81.77	8e-49	194	DE
	Unigene9182	AT2G21770	87.5	1e-28	127	DE
	Unigene9309	AT5G60020	84.02	5e-27	121	DE
	Unigene9664	AT1G77000	92	7e-11	67.9	DE
	Unigene9814	AT5G27150	78.91	6e-14	79.8	DE
	Unigene9847	AT3G58780	100	8e-07	54	DE
	Unigene9864	AT2G13115	100	5e-08	58	DE
	Unigene997	AT1G52570	91.43	4e-18	91.7	DE
	Unigene10060	AT5G37180	88.61	1e-15	85.7	UE
	Unigene11500	AT3G59140	84.85	8e-06	52	UE
	Unigene11649	AT4G17900	83.13	2e-06	54	UE
	Unigene12192	AT1G13130	81.97	2e-10	67.9	UE
	Unigene12236	AT3G49200	83.76	2e-14	81.8	UE
	Unigene12332	AT3G59140	84.16	7e-13	73.8	UE
	Unigene12617	AT3G07970	92.11	5e-06	52	UE
	Unigene13426	AT4G37520	95	2e-09	63.9	UE
	Unigene13824	AT3G03660	85.26	6e-14	77.8	UE
	Unigene14063	AT5G07740	77.5	3e-28	127	UE
	Unigene14413	AT2G01770	90.54	8e-18	91.7	UE
	Unigene14541	AT5G17260	94	8e-13	75.8	UE
	Unigene15684	AT1G55790	100	1e-06	54	UE
	Unigene16273	AT2G47115	84.78	1e-11	71.9	UE
	Unigene16314	AT5G13700	82.42	4e-19	97.6	UE
	Unigene16807	AT3G04030	81.21	2e-14	81.8	UE
	Unigene17073	AT3G14810	90.7	6e-06	54	UE
	Unigene17123	AT4G09820	80.58	2e-17	91.7	UE
	Unigene17417	AT4G13800	92.31	3e-06	54	UE
	Unigene17430	AT5G25820	79.67	3e-23	111	UE
	Unigene1755	AT4G34320	87.5	6e-07	56	UE
	Unigene18024	AT1G67260	90.91	7e-07	56	UE
	Unigene18066	AT4G13070	78.19	3e-34	147	UE
	Unigene18131	AT4G02330	80.92	1e-14	81.8	UE
	Unigene18537	AT5G37180	100	1e-06	52	UE
	Unigene19294	AT4G06658	86.21	3e-14	77.8	UE
	Unigene22077	AT1G16440	84.29	2e-06	52	UE
	Unigene22439	AT5G52882	96.61	2e-21	101	UE
	Unigene23553	AT5G62160	90.7	4e-07	54	UE
	Unigene23655	AT3G24460	96.67	2e-06	52	UE
	Unigene24457	AT4G08650	100	7e-06	50.1	UE
	Unigene25440	AT5G24540	90.91	1e-07	56	UE
	Unigene26302	AT3G14735	90.38	5e-10	63.9	UE
	Unigene26329	AT3G15170	94.29	4e-07	54	UE
	Unigene27667	AT2G47800	85	5e-10	63.9	UE
	Unigene27697	AT4G12330	95.24	3e-11	67.9	UE
	Unigene2985	AT5G18910	83.84	3e-11	69.9	UE
	Unigene30723	AT1G26130	85.94	1e-07	56	UE
	Unigene31287	AT1G18410	92.31	5e-07	54	UE
	Unigene31539	AT3G30530	90.91	1e-07	56	UE
	Unigene3212	AT2G14620	84.76	1e-14	81.8	UE
	Unigene32361	AT4G23420	89.83	9e-12	69.9	UE
	Unigene33506	AT4G26220	85.71	1e-10	65.9	UE
	Unigene33971	AT3G03910	96.55	8e-06	50.1	UE
	Unigene34076	AT5G54570	86.89	3e-08	58	UE
	Unigene3428	AT3G16340	86.44	1e-06	54	UE
	Unigene34643	AT5G42800	86.75	4e-14	77.8	UE
	Unigene35312	AT5G45890	83.13	5e-07	54	UE
	Unigene3556	AT2G05760	86.79	8e-06	50.1	UE
	Unigene3574	AT4G04105	92.06	4e-16	85.7	UE
	Unigene37487	AT5G06710	96.55	9e-06	50.1	UE
	Unigene38144	AT3G59140	92.31	6e-07	54	UE
	Unigene38427	AT1G78440	81.29	1e-11	69.9	UE
	Unigene39285	AT5G34780	91.89	9e-06	50.1	UE
	Unigene39501	AT1G69560	80.63	1e-20	99.6	UE
	Unigene40465	AT5G54570	83.57	2e-19	95.6	UE
	Unigene41403	AT4G18430	96.55	1e-05	50.1	UE
	Unigene41511	AT3G23550	93.94	1e-05	50.1	UE
	Unigene41774	AT4G33990	87.69	2e-10	65.9	UE
	Unigene42151	AT5G61430	90.41	1e-17	89.7	UE
	Unigene42334	AT4G11910	80.77	1e-08	60	UE
	Unigene439	AT5G55970	88.41	3e-12	73.8	UE
	Unigene44045	AT1G68800	84.42	4e-08	58	UE
	Unigene44881	AT1G66910	92.5	2e-07	56	UE
	Unigene46823	AT2G47800	94.74	1e-08	60	UE
	Unigene47015	AT2G36180	100	3e-06	52	UE
	Unigene4829	AT1G47840	89.83	4e-11	69.9	UE
	Unigene48352	AT3G12915	94.74	1e-08	60	UE
	Unigene48775	AT4G01970	83.18	1e-11	69.9	UE
	Unigene50586	AT3G15510	100	9e-10	63.9	UE
	Unigene5229	AT1G02850	79.72	8e-07	54	UE
	Unigene53308	AT3G44540	100	2e-07	56	UE
	Unigene53405	AT2G32530	85.37	6e-11	67.9	UE
	Unigene54897	AT1G02530	91.84	3e-10	65.9	UE
	Unigene55131	AT1G32450	82.56	4e-06	52	UE
	Unigene55284	AT1G55740	91.3	2e-08	60	UE
	Unigene56525	AT1G78265	92	7e-11	67.9	UE
	Unigene56617	AT5G58160	88	4e-06	52	UE
	Unigene58445	AT1G73850	96.67	5e-06	52	UE
	Unigene58501	AT1G55180	81.9	1e-09	63.9	UE
	Unigene58682	AT1G66280	87.5	3e-07	56	UE
	Unigene58727	AT1G32450	87.95	3e-16	85.7	UE
	Unigene58869	AT4G12280	90.36	6e-21	101	UE
	Unigene6080	AT4G01970	83.48	8e-36	151	UE
	Unigene60973	AT5G54569	91.11	8e-08	58	UE
	Unigene60989	AT4G15100	88.14	5e-09	61.9	UE
	Unigene61413	AT3G06490	94.29	1e-06	54	UE
	Unigene61976	AT2G33100	92.11	6e-06	52	UE
	Unigene62585	AT3G09260	94.12	6e-06	52	UE
	Unigene63023	AT3G45130	88	6e-06	52	UE
	Unigene63161	AT2G45040	87.1	2e-08	60	UE
	Unigene63359	AT4G21380	100	2e-06	54	UE
	Unigene63860	AT1G71240	84.29	6e-06	52	UE
	Unigene6392	AT5G49435	100	1e-33	143	UE
	Unigene64291	AT5G51490	84.72	4e-07	56	UE
	Unigene64689	AT1G03490	100	7e-06	52	UE
	Unigene65851	AT5G19640	86.02	8e-15	81.8	UE
	Unigene66109	AT1G55180	84.07	8e-15	81.8	UE
	Unigene66117	AT3G07900	90.77	8e-15	81.8	UE
	Unigene66146	AT4G26200	92.68	1e-07	58	UE
	Unigene66246	AT5G13080	87.33	2e-34	147	UE
	Unigene66379	AT3G50740	96.77	2e-06	54	UE
	Unigene66411	AT5G35960	83.54	2e-06	54	UE
	Unigene66782	AT5G48690	91.84	5e-10	65.9	UE
	Unigene66821	AT5G05840	80.43	3e-08	60	UE
	Unigene67880	AT1G10900	88.89	4e-08	60	UE
	Unigene67881	AT1G01420	90.48	9e-06	52	UE
	Unigene68075	AT3G19690	92.86	4e-08	60	UE
	Unigene68351	AT3G57380	86.83	2e-37	157	UE
	Unigene68583	AT5G52900	86.67	6e-07	56	UE
	Unigene6881	AT1G47620	92.5	9e-07	56	UE
	Unigene69049	AT1G55180	83.21	7e-16	85.7	UE
	Unigene69832	AT5G28490	78.52	5e-14	79.8	UE
	Unigene70249	AT2G37700	94.44	8e-07	56	UE
	Unigene70354	AT5G40390	92.68	2e-07	58	UE
	Unigene70457	AT5G40390	84.32	1e-42	174	UE
	Unigene70827	AT4G08620	80.84	3e-13	77.8	UE
	Unigene71346	AT1G51490	84.62	2e-14	81.8	UE
	Unigene71548	AT2G38185	89.36	5e-06	54	UE
	Unigene71574	AT3G55950	81.97	1e-28	129	UE
	Unigene716	AT4G06650	94.29	5e-07	54	UE
	Unigene71781	AT2G32770	92.86	9e-08	60	UE
	Unigene7945	AT1G75520	85.12	2e-19	97.6	UE
	Unigene823	AT2G34530	100	8e-06	50.1	UE
	Unigene874	AT5G18860	92.11	2e-06	52	UE
	Unigene8956	AT3G45780	83.05	1e-57	226	UE
	Unigene9289	AT3G55940	93.02	2e-08	61.9	UE
	Unigene9593	AT3G43600	92.45	6e-12	73.8	UE
	Unigene10009	-	-	-	-	NH
	Unigene10028	-	-	-	-	NH
	Unigene10031	-	-	-	-	NH
	Unigene10055	-	-	-	-	NH
	Unigene10076	-	-	-	-	NH
	Unigene10119	-	-	-	-	NH
	Unigene1013	-	-	-	-	NH
	Unigene10171	-	-	-	-	NH
	Unigene10185	-	-	-	-	NH
	Unigene10188	-	-	-	-	NH
	Unigene1019	-	-	-	-	NH
	Unigene10190	-	-	-	-	NH
	Unigene10268	-	-	-	-	NH
	Unigene10323	-	-	-	-	NH
	Unigene10334	-	-	-	-	NH
	Unigene10387	-	-	-	-	NH
	Unigene10389	-	-	-	-	NH
	Unigene10394	-	-	-	-	NH
	Unigene10454	-	-	-	-	NH
	Unigene10457	-	-	-	-	NH
	Unigene10458	-	-	-	-	NH
	Unigene10499	-	-	-	-	NH
	Unigene1050	-	-	-	-	NH
	Unigene1057	-	-	-	-	NH
	Unigene10592	-	-	-	-	NH
	Unigene10595	-	-	-	-	NH
	Unigene10642	-	-	-	-	NH
	Unigene10670	-	-	-	-	NH
	Unigene10682	-	-	-	-	NH
	Unigene10686	-	-	-	-	NH
	Unigene10687	-	-	-	-	NH
	Unigene10690	-	-	-	-	NH
	Unigene1072	-	-	-	-	NH
	Unigene10721	-	-	-	-	NH
	Unigene10752	-	-	-	-	NH
	Unigene10759	-	-	-	-	NH
	Unigene10782	-	-	-	-	NH
	Unigene10790	-	-	-	-	NH
	Unigene10792	-	-	-	-	NH
	Unigene10798	-	-	-	-	NH
	Unigene10852	-	-	-	-	NH
	Unigene10890	-	-	-	-	NH
	Unigene11069	-	-	-	-	NH
	Unigene11114	-	-	-	-	NH
	Unigene11129	-	-	-	-	NH
	Unigene11133	-	-	-	-	NH
	Unigene11151	-	-	-	-	NH
	Unigene11175	-	-	-	-	NH
	Unigene11211	-	-	-	-	NH
	Unigene11275	-	-	-	-	NH
	Unigene11301	-	-	-	-	NH
	Unigene1131	-	-	-	-	NH
	Unigene11329	-	-	-	-	NH
	Unigene11335	-	-	-	-	NH
	Unigene11373	-	-	-	-	NH
	Unigene11396	-	-	-	-	NH
	Unigene11416	-	-	-	-	NH
	Unigene11430	-	-	-	-	NH
	Unigene11431	-	-	-	-	NH
	Unigene11437	-	-	-	-	NH
	Unigene11451	-	-	-	-	NH
	Unigene11463	-	-	-	-	NH
	Unigene11533	-	-	-	-	NH
	Unigene11542	-	-	-	-	NH
	Unigene11582	-	-	-	-	NH
	Unigene11642	-	-	-	-	NH
	Unigene11654	-	-	-	-	NH
	Unigene11667	-	-	-	-	NH
	Unigene1169	-	-	-	-	NH
	Unigene11693	-	-	-	-	NH
	Unigene1175	-	-	-	-	NH
	Unigene11767	-	-	-	-	NH
	Unigene11768	-	-	-	-	NH
	Unigene11769	-	-	-	-	NH
	Unigene11841	-	-	-	-	NH
	Unigene11870	-	-	-	-	NH
	Unigene11879	-	-	-	-	NH
	Unigene11881	-	-	-	-	NH
	Unigene11889	-	-	-	-	NH
	Unigene11926	-	-	-	-	NH
	Unigene11933	-	-	-	-	NH
	Unigene12014	-	-	-	-	NH
	Unigene12021	-	-	-	-	NH
	Unigene1205	-	-	-	-	NH
	Unigene12057	-	-	-	-	NH
	Unigene12062	-	-	-	-	NH
	Unigene12085	-	-	-	-	NH
	Unigene1211	-	-	-	-	NH
	Unigene12124	-	-	-	-	NH
	Unigene12201	-	-	-	-	NH
	Unigene12214	-	-	-	-	NH
	Unigene1223	-	-	-	-	NH
	Unigene12282	-	-	-	-	NH
	Unigene123	-	-	-	-	NH
	Unigene12324	-	-	-	-	NH
	Unigene12334	-	-	-	-	NH
	Unigene12365	-	-	-	-	NH
	Unigene12371	-	-	-	-	NH
	Unigene12390	-	-	-	-	NH
	Unigene12417	-	-	-	-	NH
	Unigene12466	-	-	-	-	NH
	Unigene12468	-	-	-	-	NH
	Unigene12471	-	-	-	-	NH
	Unigene12528	-	-	-	-	NH
	Unigene1256	-	-	-	-	NH
	Unigene12576	-	-	-	-	NH
	Unigene12579	-	-	-	-	NH
	Unigene12671	-	-	-	-	NH
	Unigene12693	-	-	-	-	NH
	Unigene12720	-	-	-	-	NH
	Unigene12722	-	-	-	-	NH
	Unigene12806	-	-	-	-	NH
	Unigene12830	-	-	-	-	NH
	Unigene12851	-	-	-	-	NH
	Unigene12884	-	-	-	-	NH
	Unigene12904	-	-	-	-	NH
	Unigene13037	-	-	-	-	NH
	Unigene13102	-	-	-	-	NH
	Unigene13113	-	-	-	-	NH
	Unigene13116	-	-	-	-	NH
	Unigene13123	-	-	-	-	NH
	Unigene13127	-	-	-	-	NH
	Unigene13171	-	-	-	-	NH
	Unigene13234	-	-	-	-	NH
	Unigene13258	-	-	-	-	NH
	Unigene1330	-	-	-	-	NH
	Unigene13310	-	-	-	-	NH
	Unigene13413	-	-	-	-	NH
	Unigene13435	-	-	-	-	NH
	Unigene13437	-	-	-	-	NH
	Unigene13529	-	-	-	-	NH
	Unigene13533	-	-	-	-	NH
	Unigene13600	-	-	-	-	NH
	Unigene13626	-	-	-	-	NH
	Unigene1363	-	-	-	-	NH
	Unigene1368	-	-	-	-	NH
	Unigene13691	-	-	-	-	NH
	Unigene13706	-	-	-	-	NH
	Unigene13823	-	-	-	-	NH
	Unigene13841	-	-	-	-	NH
	Unigene13870	-	-	-	-	NH
	Unigene13871	-	-	-	-	NH
	Unigene13875	-	-	-	-	NH
	Unigene13883	-	-	-	-	NH
	Unigene13930	-	-	-	-	NH
	Unigene13934	-	-	-	-	NH
	Unigene13963	-	-	-	-	NH
	Unigene1398	-	-	-	-	NH
	Unigene14006	-	-	-	-	NH
	Unigene14013	-	-	-	-	NH
	Unigene1402	-	-	-	-	NH
	Unigene14046	-	-	-	-	NH
	Unigene14095	-	-	-	-	NH
	Unigene14129	-	-	-	-	NH
	Unigene14138	-	-	-	-	NH
	Unigene14174	-	-	-	-	NH
	Unigene14197	-	-	-	-	NH
	Unigene14218	-	-	-	-	NH
	Unigene14264	-	-	-	-	NH
	Unigene14289	-	-	-	-	NH
	Unigene14292	-	-	-	-	NH
	Unigene14295	-	-	-	-	NH
	Unigene14349	-	-	-	-	NH
	Unigene14382	-	-	-	-	NH
	Unigene144	-	-	-	-	NH
	Unigene14433	-	-	-	-	NH
	Unigene14486	-	-	-	-	NH
	Unigene1452	-	-	-	-	NH
	Unigene14530	-	-	-	-	NH
	Unigene14561	-	-	-	-	NH
	Unigene14678	-	-	-	-	NH
	Unigene14696	-	-	-	-	NH
	Unigene14715	-	-	-	-	NH
	Unigene14731	-	-	-	-	NH
	Unigene1474	-	-	-	-	NH
	Unigene14770	-	-	-	-	NH
	Unigene14787	-	-	-	-	NH
	Unigene148	-	-	-	-	NH
	Unigene14905	-	-	-	-	NH
	Unigene1496	-	-	-	-	NH
	Unigene14965	-	-	-	-	NH
	Unigene14983	-	-	-	-	NH
	Unigene15024	-	-	-	-	NH
	Unigene15029	-	-	-	-	NH
	Unigene15053	-	-	-	-	NH
	Unigene15123	-	-	-	-	NH
	Unigene15125	-	-	-	-	NH
	Unigene15225	-	-	-	-	NH
	Unigene15227	-	-	-	-	NH
	Unigene15232	-	-	-	-	NH
	Unigene15246	-	-	-	-	NH
	Unigene15247	-	-	-	-	NH
	Unigene15261	-	-	-	-	NH
	Unigene15273	-	-	-	-	NH
	Unigene15299	-	-	-	-	NH
	Unigene1530	-	-	-	-	NH
	Unigene1540	-	-	-	-	NH
	Unigene15445	-	-	-	-	NH
	Unigene15446	-	-	-	-	NH
	Unigene15447	-	-	-	-	NH
	Unigene15489	-	-	-	-	NH
	Unigene15497	-	-	-	-	NH
	Unigene15625	-	-	-	-	NH
	Unigene15637	-	-	-	-	NH
	Unigene15646	-	-	-	-	NH
	Unigene15690	-	-	-	-	NH
	Unigene15694	-	-	-	-	NH
	Unigene15774	-	-	-	-	NH
	Unigene15795	-	-	-	-	NH
	Unigene15955	-	-	-	-	NH
	Unigene15976	-	-	-	-	NH
	Unigene15985	-	-	-	-	NH
	Unigene16008	-	-	-	-	NH
	Unigene16018	-	-	-	-	NH
	Unigene1602	-	-	-	-	NH
	Unigene16024	-	-	-	-	NH
	Unigene16161	-	-	-	-	NH
	Unigene16189	-	-	-	-	NH
	Unigene16191	-	-	-	-	NH
	Unigene16296	-	-	-	-	NH
	Unigene16353	-	-	-	-	NH
	Unigene16444	-	-	-	-	NH
	Unigene16447	-	-	-	-	NH
	Unigene16512	-	-	-	-	NH
	Unigene16520	-	-	-	-	NH
	Unigene1654	-	-	-	-	NH
	Unigene16552	-	-	-	-	NH
	Unigene16561	-	-	-	-	NH
	Unigene16565	-	-	-	-	NH
	Unigene1657	-	-	-	-	NH
	Unigene16634	-	-	-	-	NH
	Unigene16647	-	-	-	-	NH
	Unigene16669	-	-	-	-	NH
	Unigene16678	-	-	-	-	NH
	Unigene16685	-	-	-	-	NH
	Unigene1684	-	-	-	-	NH
	Unigene1687	-	-	-	-	NH
	Unigene16902	-	-	-	-	NH
	Unigene16935	-	-	-	-	NH
	Unigene17053	-	-	-	-	NH
	Unigene17063	-	-	-	-	NH
	Unigene17069	-	-	-	-	NH
	Unigene17112	-	-	-	-	NH
	Unigene1714	-	-	-	-	NH
	Unigene172	-	-	-	-	NH
	Unigene17235	-	-	-	-	NH
	Unigene1724	-	-	-	-	NH
	Unigene17279	-	-	-	-	NH
	Unigene17282	-	-	-	-	NH
	Unigene1753	-	-	-	-	NH
	Unigene1757	-	-	-	-	NH
	Unigene1759	-	-	-	-	NH
	Unigene17631	-	-	-	-	NH
	Unigene17681	-	-	-	-	NH
	Unigene17698	-	-	-	-	NH
	Unigene1772	-	-	-	-	NH
	Unigene17737	-	-	-	-	NH
	Unigene17787	-	-	-	-	NH
	Unigene17865	-	-	-	-	NH
	Unigene18051	-	-	-	-	NH
	Unigene18083	-	-	-	-	NH
	Unigene18282	-	-	-	-	NH
	Unigene1829	-	-	-	-	NH
	Unigene18300	-	-	-	-	NH
	Unigene18310	-	-	-	-	NH
	Unigene18323	-	-	-	-	NH
	Unigene1833	-	-	-	-	NH
	Unigene18335	-	-	-	-	NH
	Unigene18337	-	-	-	-	NH
	Unigene18348	-	-	-	-	NH
	Unigene18366	-	-	-	-	NH
	Unigene18377	-	-	-	-	NH
	Unigene18384	-	-	-	-	NH
	Unigene18396	-	-	-	-	NH
	Unigene18410	-	-	-	-	NH
	Unigene18417	-	-	-	-	NH
	Unigene18418	-	-	-	-	NH
	Unigene18420	-	-	-	-	NH
	Unigene18429	-	-	-	-	NH
	Unigene18452	-	-	-	-	NH
	Unigene18453	-	-	-	-	NH
	Unigene18455	-	-	-	-	NH
	Unigene18463	-	-	-	-	NH
	Unigene1847	-	-	-	-	NH
	Unigene18479	-	-	-	-	NH
	Unigene18482	-	-	-	-	NH
	Unigene1849	-	-	-	-	NH
	Unigene18491	-	-	-	-	NH
	Unigene18495	-	-	-	-	NH
	Unigene18501	-	-	-	-	NH
	Unigene18518	-	-	-	-	NH
	Unigene1854	-	-	-	-	NH
	Unigene18551	-	-	-	-	NH
	Unigene18552	-	-	-	-	NH
	Unigene18555	-	-	-	-	NH
	Unigene18564	-	-	-	-	NH
	Unigene18565	-	-	-	-	NH
	Unigene18571	-	-	-	-	NH
	Unigene18572	-	-	-	-	NH
	Unigene18587	-	-	-	-	NH
	Unigene18592	-	-	-	-	NH
	Unigene18601	-	-	-	-	NH
	Unigene18602	-	-	-	-	NH
	Unigene18605	-	-	-	-	NH
	Unigene18609	-	-	-	-	NH
	Unigene18631	-	-	-	-	NH
	Unigene18654	-	-	-	-	NH
	Unigene18655	-	-	-	-	NH
	Unigene18679	-	-	-	-	NH
	Unigene18687	-	-	-	-	NH
	Unigene1869	-	-	-	-	NH
	Unigene18700	-	-	-	-	NH
	Unigene18718	-	-	-	-	NH
	Unigene18736	-	-	-	-	NH
	Unigene18759	-	-	-	-	NH
	Unigene18762	-	-	-	-	NH
	Unigene18775	-	-	-	-	NH
	Unigene18781	-	-	-	-	NH
	Unigene18803	-	-	-	-	NH
	Unigene18811	-	-	-	-	NH
	Unigene18820	-	-	-	-	NH
	Unigene18838	-	-	-	-	NH
	Unigene18844	-	-	-	-	NH
	Unigene18852	-	-	-	-	NH
	Unigene18854	-	-	-	-	NH
	Unigene18860	-	-	-	-	NH
	Unigene18862	-	-	-	-	NH
	Unigene18865	-	-	-	-	NH
	Unigene18878	-	-	-	-	NH
	Unigene18883	-	-	-	-	NH
	Unigene18889	-	-	-	-	NH
	Unigene189	-	-	-	-	NH
	Unigene18902	-	-	-	-	NH
	Unigene18911	-	-	-	-	NH
	Unigene18928	-	-	-	-	NH
	Unigene18949	-	-	-	-	NH
	Unigene1895	-	-	-	-	NH
	Unigene18956	-	-	-	-	NH
	Unigene18969	-	-	-	-	NH
	Unigene18973	-	-	-	-	NH
	Unigene18988	-	-	-	-	NH
	Unigene18990	-	-	-	-	NH
	Unigene18998	-	-	-	-	NH
	Unigene19000	-	-	-	-	NH
	Unigene19033	-	-	-	-	NH
	Unigene19034	-	-	-	-	NH
	Unigene19040	-	-	-	-	NH
	Unigene19059	-	-	-	-	NH
	Unigene19061	-	-	-	-	NH
	Unigene19062	-	-	-	-	NH
	Unigene19078	-	-	-	-	NH
	Unigene19086	-	-	-	-	NH
	Unigene19087	-	-	-	-	NH
	Unigene19091	-	-	-	-	NH
	Unigene19097	-	-	-	-	NH
	Unigene19109	-	-	-	-	NH
	Unigene19118	-	-	-	-	NH
	Unigene19132	-	-	-	-	NH
	Unigene19133	-	-	-	-	NH
	Unigene19143	-	-	-	-	NH
	Unigene19146	-	-	-	-	NH
	Unigene19160	-	-	-	-	NH
	Unigene19164	-	-	-	-	NH
	Unigene1917	-	-	-	-	NH
	Unigene19202	-	-	-	-	NH
	Unigene1923	-	-	-	-	NH
	Unigene19231	-	-	-	-	NH
	Unigene19262	-	-	-	-	NH
	Unigene19274	-	-	-	-	NH
	Unigene1928	-	-	-	-	NH
	Unigene19296	-	-	-	-	NH
	Unigene19302	-	-	-	-	NH
	Unigene19313	-	-	-	-	NH
	Unigene19314	-	-	-	-	NH
	Unigene19324	-	-	-	-	NH
	Unigene19342	-	-	-	-	NH
	Unigene19355	-	-	-	-	NH
	Unigene19356	-	-	-	-	NH
	Unigene19399	-	-	-	-	NH
	Unigene19410	-	-	-	-	NH
	Unigene19411	-	-	-	-	NH
	Unigene19428	-	-	-	-	NH
	Unigene19439	-	-	-	-	NH
	Unigene19498	-	-	-	-	NH
	Unigene19503	-	-	-	-	NH
	Unigene19508	-	-	-	-	NH
	Unigene19535	-	-	-	-	NH
	Unigene19564	-	-	-	-	NH
	Unigene19567	-	-	-	-	NH
	Unigene19575	-	-	-	-	NH
	Unigene19605	-	-	-	-	NH
	Unigene19619	-	-	-	-	NH
	Unigene1962	-	-	-	-	NH
	Unigene19621	-	-	-	-	NH
	Unigene19635	-	-	-	-	NH
	Unigene19681	-	-	-	-	NH
	Unigene19692	-	-	-	-	NH
	Unigene19693	-	-	-	-	NH
	Unigene19704	-	-	-	-	NH
	Unigene1974	-	-	-	-	NH
	Unigene1975	-	-	-	-	NH
	Unigene19767	-	-	-	-	NH
	Unigene19866	-	-	-	-	NH
	Unigene19871	-	-	-	-	NH
	Unigene19873	-	-	-	-	NH
	Unigene19879	-	-	-	-	NH
	Unigene19887	-	-	-	-	NH
	Unigene19931	-	-	-	-	NH
	Unigene19965	-	-	-	-	NH
	Unigene19977	-	-	-	-	NH
	Unigene19986	-	-	-	-	NH
	Unigene20016	-	-	-	-	NH
	Unigene20032	-	-	-	-	NH
	Unigene20043	-	-	-	-	NH
	Unigene20048	-	-	-	-	NH
	Unigene20099	-	-	-	-	NH
	Unigene20116	-	-	-	-	NH
	Unigene20127	-	-	-	-	NH
	Unigene20144	-	-	-	-	NH
	Unigene20151	-	-	-	-	NH
	Unigene2020	-	-	-	-	NH
	Unigene20211	-	-	-	-	NH
	Unigene20219	-	-	-	-	NH
	Unigene20222	-	-	-	-	NH
	Unigene20225	-	-	-	-	NH
	Unigene20255	-	-	-	-	NH
	Unigene20267	-	-	-	-	NH
	Unigene20272	-	-	-	-	NH
	Unigene20315	-	-	-	-	NH
	Unigene20316	-	-	-	-	NH
	Unigene20318	-	-	-	-	NH
	Unigene20320	-	-	-	-	NH
	Unigene20329	-	-	-	-	NH
	Unigene20341	-	-	-	-	NH
	Unigene20349	-	-	-	-	NH
	Unigene20351	-	-	-	-	NH
	Unigene20369	-	-	-	-	NH
	Unigene20389	-	-	-	-	NH
	Unigene20398	-	-	-	-	NH
	Unigene20401	-	-	-	-	NH
	Unigene20422	-	-	-	-	NH
	Unigene20423	-	-	-	-	NH
	Unigene20443	-	-	-	-	NH
	Unigene20460	-	-	-	-	NH
	Unigene20463	-	-	-	-	NH
	Unigene20500	-	-	-	-	NH
	Unigene20518	-	-	-	-	NH
	Unigene20520	-	-	-	-	NH
	Unigene20534	-	-	-	-	NH
	Unigene20535	-	-	-	-	NH
	Unigene20565	-	-	-	-	NH
	Unigene2057	-	-	-	-	NH
	Unigene206	-	-	-	-	NH
	Unigene20631	-	-	-	-	NH
	Unigene20666	-	-	-	-	NH
	Unigene20672	-	-	-	-	NH
	Unigene20690	-	-	-	-	NH
	Unigene20711	-	-	-	-	NH
	Unigene2072	-	-	-	-	NH
	Unigene20724	-	-	-	-	NH
	Unigene20730	-	-	-	-	NH
	Unigene20769	-	-	-	-	NH
	Unigene20778	-	-	-	-	NH
	Unigene2083	-	-	-	-	NH
	Unigene20836	-	-	-	-	NH
	Unigene20845	-	-	-	-	NH
	Unigene20863	-	-	-	-	NH
	Unigene20870	-	-	-	-	NH
	Unigene20874	-	-	-	-	NH
	Unigene20876	-	-	-	-	NH
	Unigene2088	-	-	-	-	NH
	Unigene20911	-	-	-	-	NH
	Unigene20933	-	-	-	-	NH
	Unigene20948	-	-	-	-	NH
	Unigene20960	-	-	-	-	NH
	Unigene20987	-	-	-	-	NH
	Unigene20989	-	-	-	-	NH
	Unigene20991	-	-	-	-	NH
	Unigene2100	-	-	-	-	NH
	Unigene21005	-	-	-	-	NH
	Unigene21009	-	-	-	-	NH
	Unigene2101	-	-	-	-	NH
	Unigene21012	-	-	-	-	NH
	Unigene21022	-	-	-	-	NH
	Unigene21034	-	-	-	-	NH
	Unigene21037	-	-	-	-	NH
	Unigene21040	-	-	-	-	NH
	Unigene21054	-	-	-	-	NH
	Unigene21068	-	-	-	-	NH
	Unigene21087	-	-	-	-	NH
	Unigene21101	-	-	-	-	NH
	Unigene21127	-	-	-	-	NH
	Unigene21134	-	-	-	-	NH
	Unigene21138	-	-	-	-	NH
	Unigene21150	-	-	-	-	NH
	Unigene2116	-	-	-	-	NH
	Unigene21176	-	-	-	-	NH
	Unigene21178	-	-	-	-	NH
	Unigene21184	-	-	-	-	NH
	Unigene2121	-	-	-	-	NH
	Unigene21250	-	-	-	-	NH
	Unigene21258	-	-	-	-	NH
	Unigene21322	-	-	-	-	NH
	Unigene21326	-	-	-	-	NH
	Unigene21342	-	-	-	-	NH
	Unigene21343	-	-	-	-	NH
	Unigene21347	-	-	-	-	NH
	Unigene21371	-	-	-	-	NH
	Unigene21389	-	-	-	-	NH
	Unigene21394	-	-	-	-	NH
	Unigene21427	-	-	-	-	NH
	Unigene21432	-	-	-	-	NH
	Unigene21436	-	-	-	-	NH
	Unigene2145	-	-	-	-	NH
	Unigene21464	-	-	-	-	NH
	Unigene21482	-	-	-	-	NH
	Unigene21486	-	-	-	-	NH
	Unigene21495	-	-	-	-	NH
	Unigene21523	-	-	-	-	NH
	Unigene21544	-	-	-	-	NH
	Unigene21557	-	-	-	-	NH
	Unigene21561	-	-	-	-	NH
	Unigene2159	-	-	-	-	NH
	Unigene21596	-	-	-	-	NH
	Unigene21622	-	-	-	-	NH
	Unigene21645	-	-	-	-	NH
	Unigene21671	-	-	-	-	NH
	Unigene21685	-	-	-	-	NH
	Unigene21692	-	-	-	-	NH
[truncated: 24,196 more rows]

## Sheet: Table S7C
Table S7C. Homologous comparison via BLAST rearches against the vetch database using the transcripts enriched in Arabidopsis floral organs. This table displays the corresponding detailed information for the Table B in Table S7A. a, Informations of corresponding vetch sequences when BLAST against the vetch genome database using the Arabidopsis sequences; EE, enriched expression; DE, detectable exp…
Organs	Query ID of Arabidopsis	Subject ID of vetch	Identity(%)a	E-valuea	Scorea	Expression pattern
Sepals	AT1G15520	Unigene3557	86.78	1e-38	163	EE
	AT1G26770	Unigene51882	82.27	6e-15	81.8	EE
	AT1G72180	Unigene68153	82.57	2e-09	65.9	EE
	AT2G36630	Unigene55409	82.75	3e-37	157	EE
	AT2G36750	Unigene34134	90.91	7e-07	56	EE
	AT2G39350	Unigene58362	82.76	1e-27	125	EE
	AT3G55130	Unigene59706	85.71	4e-06	54	EE
	AT5G06860	Unigene11424	91.67	1e-06	48.1	EE
	AT5G22860	Unigene66499	84.71	8e-10	65.9	EE
	AT5G43450	Unigene576	94.74	4e-08	60	EE
	AT5G64410	Unigene70727	79.64	1e-33	145	EE
	AT1G01520	Unigene17580	80.69	5e-22	105	DE
	AT1G02850	Unigene424	90.91	2e-19	97.6	DE
	AT1G05680	Unigene15924	83.18	4e-11	69.9	DE
	AT1G06430	Unigene68687	83.46	1e-43	178	DE
	AT1G06690	Unigene48951	81.6	1e-23	111	DE
	AT1G07180	Unigene16983	77.53	2e-35	151	DE
	AT1G07450	Unigene1520	90.91	4e-07	56	DE
	AT1G09080	Unigene28101	85	4e-09	63.9	DE
	AT1G17020	Unigene13603	85.71	6e-10	65.9	DE
	AT1G17050	Unigene68754	87.69	7e-10	65.9	DE
	AT1G17170	Unigene13145	90	2e-08	60	DE
	AT1G17420	Unigene71332	79.13	3e-10	67.9	DE
	AT1G22810	Unigene39822	100	5e-06	52	DE
	AT1G23010	Unigene63709	88.51	4e-18	93.7	DE
	AT1G23090	Unigene47646	82.44	3e-13	77.8	DE
	AT1G27040	Unigene64040	83.22	2e-19	97.6	DE
	AT1G30100	Unigene71481	87.61	4e-24	113	DE
	AT1G30220	Unigene59354	85.42	7e-26	119	DE
	AT1G30420	Unigene67804	81.23	3e-33	145	DE
	AT1G48000	Unigene64136	86.52	3e-29	129	DE
	AT1G50250	Unigene49582	83.46	2e-42	174	DE
	AT1G51340	Unigene62497	82.46	2e-20	101	DE
	AT1G51700	Unigene67507	84.96	3e-17	89.7	DE
	AT1G55850	Unigene71072	86.67	7e-11	69.9	DE
	AT1G57590	Unigene12178	79.31	5e-29	129	DE
	AT1G57770	Unigene6398	84.56	4e-21	103	DE
	AT1G59700	Unigene17829	84.51	2e-06	54	DE
	AT1G60730	Unigene10513	82.61	2e-19	97.6	DE
	AT1G61800	Unigene7815	79.42	5e-23	109	DE
	AT1G65620	Unigene13788	88.57	6e-13	75.8	DE
	AT1G68320	Unigene67691	85.22	2e-46	186	DE
	AT1G69790	Unigene59082	79	3e-09	63.9	DE
	AT1G70530	Unigene69571	90.91	9e-07	56	DE
	AT1G70580	Unigene58220	84.56	4e-21	103	DE
	AT1G72680	Unigene67928	78.29	3e-21	103	DE
	AT1G74810	Unigene4144	88.24	2e-11	71.9	DE
	AT1G77120	Unigene19794	89.61	5e-17	89.7	DE
	AT1G77450	Unigene41957	79.59	8e-12	71.9	DE
	AT1G78510	Unigene68754	78.52	8e-13	75.8	DE
	AT1G78950	Unigene13921	81.62	6e-33	143	DE
	AT1G78970	Unigene49822	83.16	2e-08	61.9	DE
	AT1G79270	Unigene7251	81.28	5e-18	93.7	DE
	AT2G02000	Unigene70173	80	2e-41	170	DE
	AT2G16430	Unigene33340	87.66	1e-36	155	DE
	AT2G17640	Unigene19050	85.29	6e-07	56	DE
	AT2G20880	Unigene60518	81.13	9e-06	52	DE
	AT2G21220	Unigene54105	93.18	9e-10	63.9	DE
	AT2G21320	Unigene65562	79.31	3e-17	89.7	DE
	AT2G21640	Unigene1066	86.79	9e-06	50.1	DE
	AT2G21880	Unigene57476	88	4e-29	129	DE
	AT2G22970	Unigene20496	81.91	7e-06	52	DE
	AT2G23840	Unigene9232	79.53	8e-09	61.9	DE
	AT2G27150	Unigene17291	83.15	5e-07	58	DE
	AT2G27420	Unigene54791	85.05	6e-16	85.7	DE
	AT2G29650	Unigene5869	82.19	8e-75	281	DE
	AT2G30540	Unigene41178	100	7e-08	58	DE
	AT2G34070	Unigene70467	85.83	2e-16	87.7	DE
	AT2G36800	Unigene6713	96.97	2e-07	58	DE
	AT2G37240	Unigene60007	83.85	2e-24	113	DE
	AT2G41040	Unigene69537	85.14	4e-08	60	DE
	AT2G41250	Unigene61477	83.65	8e-12	71.9	DE
	AT2G45570	Unigene27697	91.3	5e-08	60	DE
	AT2G46680	Unigene62166	85.94	1e-23	111	DE
	AT2G46790	Unigene66900	83.64	9e-13	75.8	DE
	AT2G48030	Unigene59883	94.74	5e-08	60	DE
	AT3G01530	Unigene65818	87.93	4e-08	60	DE
	AT3G01970	Unigene11992	85.71	3e-08	60	DE
	AT3G02500	Unigene15608	94.74	3e-08	60	DE
	AT3G04070	Unigene70819	84.35	6e-16	85.7	DE
	AT3G05640	Unigene67505	85.71	8e-10	65.9	DE
	AT3G06500	Unigene71565	78.89	8e-17	89.7	DE
	AT3G07340	Unigene8409	86.05	8e-47	188	DE
	AT3G09650	Unigene71090	80.35	2e-26	121	DE
	AT3G10150	Unigene66138	79.79	1e-10	67.9	DE
	AT3G14440	Unigene71481	92.59	5e-24	113	DE
	AT3G15270	Unigene12788	85.71	4e-10	65.9	DE
	AT3G17110	Unigene6760	85.71	1e-06	54	DE
	AT3G22370	Unigene7621	83.39	3e-49	196	DE
	AT3G24170	Unigene63383	80.86	1e-58	228	DE
	AT3G24190	Unigene71008	78.38	2e-66	254	DE
	AT3G24230	Unigene17226	87.31	1e-29	131	DE
	AT3G28210	Unigene2944	88.52	1e-07	58	DE
	AT3G49160	Unigene11758	100	1e-09	65.9	DE
	AT3G51895	Unigene70780	83.69	3e-19	97.6	DE
	AT3G57460	Unigene19335	82.61	3e-11	69.9	DE
	AT3G57680	Unigene71839	86.84	4e-33	143	DE
	AT3G59140	Unigene58815	83.46	2e-15	85.7	DE
	AT3G61890	Unigene62166	83.94	1e-19	97.6	DE
	AT4G01870	Unigene66759	97.14	1e-08	61.9	DE
	AT4G04500	Unigene62444	100	2e-07	58	DE
	AT4G16670	Unigene16023	92	2e-10	67.9	DE
	AT4G16680	Unigene2393	94.12	4e-13	77.8	DE
	AT4G16790	Unigene41664	100	7e-06	52	DE
	AT4G24120	Unigene69649	78.48	5e-15	83.8	DE
	AT4G25100	Unigene62966	94	6e-13	75.8	DE
	AT4G25450	Unigene8655	79.39	7e-45	182	DE
	AT4G27410	Unigene31967	88.31	7e-15	81.8	DE
	AT4G27820	Unigene424	90	5e-08	60	DE
	AT4G27830	Unigene424	88.71	2e-10	67.9	DE
	AT4G28140	Unigene47998	89.66	1e-10	67.9	DE
	AT4G31390	Unigene71259	79.23	5e-129	462	DE
	AT4G31860	Unigene58179	83.8	9e-28	125	DE
	AT4G31870	Unigene62268	80.1	8e-14	77.8	DE
	AT4G32770	Unigene69668	81.06	9e-56	218	DE
	AT4G32980	Unigene36038	86.46	3e-16	87.7	DE
	AT4G37980	Unigene62327	83.72	4e-08	60	DE
	AT5G01410	Unigene48786	81.88	8e-31	135	DE
	AT5G05840	Unigene57067	90.32	8e-13	75.8	DE
	AT5G08370	Unigene257	83.13	3e-21	103	DE
	AT5G09440	Unigene66068	96.88	5e-07	56	DE
	AT5G15860	Unigene17236	78.33	2e-25	117	DE
	AT5G16080	Unigene67599	90.91	6e-07	56	DE
	AT5G16560	Unigene6830	83.33	8e-32	139	DE
	AT5G16960	Unigene40781	97.3	6e-10	65.9	DE
	AT5G16970	Unigene16167	81	6e-22	105	DE
	AT5G16980	Unigene16167	82.07	8e-15	81.8	DE
	AT5G17450	Unigene66320	90.48	8e-14	77.8	DE
	AT5G20380	Unigene12156	82.78	3e-46	186	DE
	AT5G23210	Unigene69518	86.44	3e-22	107	DE
	AT5G23810	Unigene18245	82.73	2e-10	67.9	DE
	AT5G24120	Unigene61743	80.77	1e-18	95.6	DE
	AT5G24260	Unigene71695	85.71	8e-17	89.7	DE
	AT5G28030	Unigene70276	81.37	8e-15	81.8	DE
	AT5G35970	Unigene5784	78.94	5e-34	147	DE
	AT5G43380	Unigene69338	80.08	1e-20	101	DE
	AT5G49480	Unigene57905	83.75	4e-07	56	DE
	AT5G50100	Unigene54282	87.1	3e-08	60	DE
	AT5G50130	Unigene8519	89.23	2e-12	73.8	DE
	AT5G51720	Unigene62269	84.38	4e-12	71.9	DE
	AT5G52570	Unigene56572	90.65	3e-30	133	DE
	AT5G52810	Unigene65101	84.42	1e-07	58	DE
	AT5G53970	Unigene30525	83.87	2e-16	87.7	DE
	AT5G56090	Unigene58984	82.63	3e-37	157	DE
	AT5G56970	Unigene62817	90.7	3e-06	54	DE
	AT5G57050	Unigene17119	87.1	6e-08	60	DE
	AT5G57350	Unigene71798	79.23	2e-55	218	DE
	AT5G57520	Unigene35918	83.96	3e-13	75.8	DE
	AT5G57960	Unigene47149	81.66	2e-26	121	DE
	AT5G60540	Unigene2479	86.15	1e-07	58	DE
	AT5G62360	Unigene6190	94.44	4e-07	56	DE
	AT5G63790	Unigene17403	81.18	3e-39	163	DE
	AT5G64120	Unigene18010	93.33	6e-10	65.9	DE
	AT5G67030	Unigene71896	78.38	1e-43	178	DE
	AT1G30040	Unigene54702	88.46	6e-07	56	UE
	AT1G32350	Unigene7621	91.94	3e-15	83.8	UE
	AT1G71030	Unigene2529	86.21	7e-06	52	UE
	AT1G73750	Unigene40285	85.71	3e-06	54	UE
	AT2G04040	Unigene50297	100	4e-08	60	UE
	AT2G04050	Unigene50297	100	2e-07	58	UE
	AT2G14620	Unigene3212	84.76	9e-15	81.8	UE
	AT2G19570	Unigene13777	82.46	1e-20	101	UE
	AT2G38250	Unigene47080	82.58	2e-18	93.7	UE
	AT2G40470	Unigene4470	95.38	5e-22	105	UE
	AT3G04520	Unigene59776	82.24	9e-09	61.9	UE
	AT3G24140	Unigene53835	86.86	6e-29	129	UE
	AT3G24460	Unigene52988	84.38	1e-18	95.6	UE
	AT3G53960	Unigene47966	90.57	9e-10	65.9	UE
	AT4G37370	Unigene10908	96.88	7e-07	56	UE
	AT5G04770	Unigene64515	79.31	6e-11	69.9	UE
	AT5G13320	Unigene71696	90.91	9e-07	56	UE
	AT5G22300	Unigene64326	80.29	1e-42	174	UE
	AT5G54840	Unigene70521	85.71	1e-13	77.8	UE
	AT5G62730	Unigene43656	85.37	2e-10	67.9	UE
	AT1G02580	-	-	-	-	NH
	AT1G02820	-	-	-	-	NH
	AT1G03055	-	-	-	-	NH
	AT1G05560	-	-	-	-	NH
	AT1G07390	-	-	-	-	NH
	AT1G09500	-	-	-	-	NH
	AT1G10585	-	-	-	-	NH
	AT1G13650	-	-	-	-	NH
	AT1G13990	-	-	-	-	NH
	AT1G16730	-	-	-	-	NH
	AT1G20070	-	-	-	-	NH
	AT1G21460	-	-	-	-	NH
	AT1G30540	-	-	-	-	NH
	AT1G32940	-	-	-	-	NH
	AT1G33560	-	-	-	-	NH
	AT1G33960	-	-	-	-	NH
	AT1G34040	-	-	-	-	NH
	AT1G51820	-	-	-	-	NH
	AT1G53560	-	-	-	-	NH
	AT1G54040	-	-	-	-	NH
	AT1G56060	-	-	-	-	NH
	AT1G61120	-	-	-	-	NH
	AT1G63340	-	-	-	-	NH
	AT1G63530	-	-	-	-	NH
	AT1G64900	-	-	-	-	NH
	AT1G65480	-	-	-	-	NH
	AT1G68620	-	-	-	-	NH
	AT1G69523	-	-	-	-	NH
	AT1G69610	-	-	-	-	NH
	AT1G76190	-	-	-	-	NH
	AT1G76530	-	-	-	-	NH
	AT1G79410	-	-	-	-	NH
	AT2G02390	-	-	-	-	NH
	AT2G03760	-	-	-	-	NH
	AT2G15310	-	-	-	-	NH
	AT2G21195	-	-	-	-	NH
	AT2G21200	-	-	-	-	NH
	AT2G29350	-	-	-	-	NH
	AT2G32210	-	-	-	-	NH
	AT2G35980	-	-	-	-	NH
	AT2G36145	-	-	-	-	NH
	AT2G36780	-	-	-	-	NH
	AT2G37760	-	-	-	-	NH
	AT2G37770	-	-	-	-	NH
	AT2G38640	-	-	-	-	NH
	AT2G40100	-	-	-	-	NH
	AT2G41380	-	-	-	-	NH
	AT2G41730	-	-	-	-	NH
	AT2G43510	-	-	-	-	NH
	AT2G43820	-	-	-	-	NH
	AT2G44130	-	-	-	-	NH
	AT2G47710	-	-	-	-	NH
	AT2G47880	-	-	-	-	NH
	AT3G02150	-	-	-	-	NH
	AT3G03470	-	-	-	-	NH
	AT3G03480	-	-	-	-	NH
	AT3G04000	-	-	-	-	NH
	AT3G07720	-	-	-	-	NH
	AT3G11480	-	-	-	-	NH
	AT3G13950	-	-	-	-	NH
	AT3G14395	-	-	-	-	NH
	AT3G14620	-	-	-	-	NH
	AT3G14690	-	-	-	-	NH
	AT3G15760	-	-	-	-	NH
	AT3G17609	-	-	-	-	NH
	AT3G17800	-	-	-	-	NH
	AT3G20100	-	-	-	-	NH
	AT3G21760	-	-	-	-	NH
	AT3G22550	-	-	-	-	NH
	AT3G23880	-	-	-	-	NH
	AT3G25180	-	-	-	-	NH
	AT3G26290	-	-	-	-	NH
	AT3G27660	-	-	-	-	NH
	AT3G28270	-	-	-	-	NH
	AT3G28740	-	-	-	-	NH
	AT3G30460	-	-	-	-	NH
	AT3G44450	-	-	-	-	NH
	AT3G46670	-	-	-	-	NH
	AT3G49780	-	-	-	-	NH
	AT3G56620	-	-	-	-	NH
	AT3G57760	-	-	-	-	NH
	AT3G62960	-	-	-	-	NH
	AT4G05370	-	-	-	-	NH
	AT4G14690	-	-	-	-	NH
	AT4G15550	-	-	-	-	NH
	AT4G16000	-	-	-	-	NH
	AT4G16690	-	-	-	-	NH
	AT4G16730	-	-	-	-	NH
	AT4G16740	-	-	-	-	NH
	AT4G22470	-	-	-	-	NH
	AT4G23210	-	-	-	-	NH
	AT4G23496	-	-	-	-	NH
	AT4G23990	-	-	-	-	NH
	AT4G24000	-	-	-	-	NH
	AT4G25830	-	-	-	-	NH
	AT4G29570	-	-	-	-	NH
	AT4G30430	-	-	-	-	NH
	AT4G33540	-	-	-	-	NH
	AT4G34138	-	-	-	-	NH
	AT4G37430	-	-	-	-	NH
	AT5G01200	-	-	-	-	NH
	AT5G13370	-	-	-	-	NH
	AT5G24150	-	-	-	-	NH
	AT5G39050	-	-	-	-	NH
	AT5G40210	-	-	-	-	NH
	AT5G43260	-	-	-	-	NH
	AT5G43860	-	-	-	-	NH
	AT5G48400	-	-	-	-	NH
	AT5G50940	-	-	-	-	NH
	AT5G53200	-	-	-	-	NH
	AT5G55050	-	-	-	-	NH
	AT5G57785	-	-	-	-	NH
	AT5G59130	-	-	-	-	NH
	AT5G59310	-	-	-	-	NH
	AT5G59510	-	-	-	-	NH
	AT5G61820	-	-	-	-	NH
	AT5G64230	-	-	-	-	NH
	AT5G65730	-	-	-	-	NH
	AT5G67600	-	-	-	-	NH
Petals	AT1G01030	Unigene70356	87.95	9e-16	85.7	EE
	AT1G01610	Unigene33684	81.06	3e-09	63.9	EE
	AT1G11300	Unigene63621	88.31	4e-14	81.8	EE
	AT1G11410	Unigene51154	87.5	1e-06	56	EE
	AT1G15360	Unigene2424	96.77	1e-22	107	EE
	AT1G25450	Unigene71176	83.7	3e-09	63.9	EE
	AT1G33240	Unigene65866	88.24	2e-11	71.9	EE
	AT1G33990	Unigene5193	84.8	2e-19	97.6	EE
	AT1G43620	Unigene11717	78.32	9e-60	232	EE
	AT1G48100	Unigene17816	84.34	1e-08	61.9	EE
	AT1G48480	Unigene70246	85.26	3e-13	77.8	EE
	AT1G49430	Unigene17009	82.44	3e-13	77.8	EE
	AT1G54820	Unigene70151	89.23	3e-12	73.8	EE
	AT1G65060	Unigene68726	82.88	6e-11	69.9	EE
	AT2G38110	Unigene10505	98.11	2e-19	97.6	EE
	AT2G41540	Unigene17504	80.83	6e-131	468	EE
	AT2G41830	Unigene30683	86.55	2e-21	105	EE
	AT2G44770	Unigene61406	81.93	5e-57	222	EE
	AT2G45650	Unigene66678	87.36	5e-44	178	EE
	AT2G46930	Unigene70333	84.95	3e-12	73.8	EE
	AT2G46990	Unigene63659	92.68	7e-08	58	EE
	AT3G01140	Unigene756	81.52	2e-41	170	EE
	AT3G02110	Unigene66162	91.07	1e-11	71.9	EE
	AT3G02170	Unigene60952	88	9e-07	52	EE
	AT3G04290	Unigene70188	81	8e-19	95.6	EE
	AT3G07010	Unigene17226	85.21	2e-31	137	EE
	AT3G16170	Unigene53287	82.76	1e-11	71.9	EE
	AT3G44610	Unigene2962	81.52	2e-41	170	EE
	AT3G60030	Unigene66639	82.08	2e-21	105	EE
	AT3G63350	Unigene64094	89.23	2e-12	73.8	EE
	AT4G00950	Unigene48934	100	1e-07	58	EE
	AT4G01080	Unigene44314	89.29	3e-09	63.9	EE
	AT4G09460	Unigene47846	82.83	2e-27	123	EE
	AT4G13210	Unigene17226	85.91	6e-29	129	EE
	AT4G13710	Unigene17226	83.33	3e-22	107	EE
	AT4G27730	Unigene14726	80.74	2e-08	61.9	EE
	AT4G28780	Unigene70712	82.76	1e-11	71.9	EE
	AT4G37080	Unigene18041	83.9	4e-40	167	EE
	AT5G13930	Unigene26749	89.61	5e-17	89.7	EE
	AT5G15310	Unigene756	82.89	7e-62	238	EE
	AT5G28300	Unigene12639	89.04	2e-14	81.8	EE
	AT5G33370	Unigene37606	84.15	4e-08	60	EE
	AT5G42280	Unigene68885	88.61	1e-15	85.7	EE
	AT5G42780	Unigene58634	100	1e-06	50.1	EE
	AT5G43760	Unigene45638	82.33	1e-30	135	EE
	AT5G47820	Unigene12812	82.62	9e-82	305	EE
	AT5G62670	Unigene50043	84.51	3e-57	224	EE
	AT5G63390	Unigene61253	84.47	2e-13	77.8	EE
	AT5G66800	Unigene5342	100	1e-07	58	EE
	ATMG00900	Unigene22894	83.04	3e-10	65.9	EE
	AT1G01090	Unigene41952	81.7	6e-26	119	DE
	AT1G01600	Unigene71741	80.16	1e-21	105	DE
	AT1G04430	Unigene61514	83.15	3e-44	180	DE
	AT1G07720	Unigene71482	80.38	2e-10	67.9	DE
	AT1G09420	Unigene14179	79.9	1e-12	75.8	DE
	AT1G10300	Unigene13946	81.2	6e-42	172	DE
	AT1G10640	Unigene17671	94.74	5e-08	60	DE
	AT1G10850	Unigene17908	82.2	3e-10	67.9	DE
	AT1G12230	Unigene66718	84.25	2e-22	107	DE
	AT1G12430	Unigene8847	82.72	7e-55	216	DE
	AT1G13700	Unigene54055	92.11	7e-06	52	DE
	AT1G16060	Unigene14156	82.78	7e-68	258	DE
	AT1G16750	Unigene7302	96.97	2e-07	58	DE
	AT1G17140	Unigene13923	88.14	1e-08	61.9	DE
	AT1G17745	Unigene65249	82.31	1e-15	85.7	DE
	AT1G18330	Unigene66276	81.44	8e-16	85.7	DE
	AT1G19650	Unigene15331	81.88	2e-35	151	DE
	AT1G20010	Unigene65290	81.07	3e-74	280	DE
	AT1G20190	Unigene61950	87.69	5e-10	65.9	DE
	AT1G21590	Unigene14487	88.89	8e-08	60	DE
	AT1G22060	Unigene54294	80.56	3e-18	95.6	DE
	AT1G22170	Unigene63844	81.28	3e-46	186	DE
	AT1G22910	Unigene53183	83.7	3e-09	63.9	DE
	AT1G24530	Unigene17986	79.92	3e-18	93.7	DE
	AT1G30120	Unigene58829	79.71	6e-32	139	DE
	AT1G30440	Unigene70105	83.03	1e-21	105	DE
	AT1G34430	Unigene63540	81.42	1e-67	258	DE
	AT1G60030	Unigene8570	78.15	2e-35	151	DE
	AT1G60810	Unigene66558	79.59	7e-44	178	DE
	AT1G61930	Unigene62656	90.74	1e-10	67.9	DE
	AT1G62640	Unigene71169	79.95	3e-37	157	DE
	AT1G63710	Unigene71741	85.59	6e-20	99.6	DE
	AT1G64390	Unigene47215	80.19	1e-15	85.7	DE
	AT1G64970	Unigene8328	83.19	2e-13	77.8	DE
	AT1G65560	Unigene7942	85.19	6e-10	65.9	DE
	AT1G66430	Unigene69249	79.41	8e-62	238	DE
	AT1G67300	Unigene62426	82.35	5e-11	69.9	DE
	AT1G67560	Unigene56998	82.57	1e-09	65.9	DE
	AT1G68130	Unigene71205	78.84	4e-27	123	DE
	AT1G68780	Unigene70887	86.14	6e-17	89.7	DE
	AT1G69040	Unigene10827	84.65	1e-48	194	DE
	AT1G70280	Unigene71466	82.55	3e-28	127	DE
	AT1G74160	Unigene70111	84.34	3e-08	61.9	DE
	AT1G75420	Unigene69463	77.24	9e-19	95.6	DE
	AT1G78050	Unigene63844	79.83	6e-32	139	DE
	AT1G79700	Unigene14156	80.13	3e-48	192	DE
	AT2G04570	Unigene70614	89.29	2e-09	63.9	DE
	AT2G05990	Unigene67527	81.56	3e-40	167	DE
	AT2G16580	Unigene33936	90.2	6e-09	61.9	DE
	AT2G16900	Unigene10349	100	5e-08	60	DE
	AT2G17650	Unigene43740	83.64	9e-13	75.8	DE
	AT2G19170	Unigene17489	78.03	1e-49	198	DE
	AT2G20180	Unigene69766	81.94	9e-16	85.7	DE
	AT2G20240	Unigene63698	87.5	1e-06	56	DE
	AT2G22420	Unigene68006	85.71	4e-17	89.7	DE
	AT2G26910	Unigene67546	82.23	1e-53	212	DE
	AT2G27920	Unigene68273	81.55	2e-32	141	DE
	AT2G28610	Unigene11802	94.59	1e-07	58	DE
	AT2G30200	Unigene70915	79.28	1e-75	283	DE
	AT2G32430	Unigene18163	78.18	5e-42	172	DE
	AT2G32560	Unigene70232	83.62	4e-14	79.8	DE
	AT2G37640	Unigene15115	83.95	7e-25	115	DE
	AT2G39980	Unigene56791	83.05	1e-12	75.8	DE
	AT2G40540	Unigene53464	80.41	1e-21	105	DE
	AT2G40610	Unigene16115	88.31	8e-15	81.8	DE
	AT2G42620	Unigene64676	82.47	2e-17	91.7	DE
	AT2G44740	Unigene3050	80.54	1e-19	97.6	DE
	AT2G45050	Unigene70112	85.32	3e-17	89.7	DE
	AT2G46710	Unigene4154	82.44	2e-13	77.8	DE
	AT3G01750	Unigene64563	95.12	1e-09	65.9	DE
	AT3G02540	Unigene45253	90.11	6e-23	109	DE
	AT3G02990	Unigene17979	84.11	2e-13	77.8	DE
	AT3G03450	Unigene70675	87.5	9e-07	56	DE
	AT3G03770	Unigene17490	85.29	6e-15	83.8	DE
	AT3G03930	Unigene47946	83.46	3e-17	89.7	DE
	AT3G05600	Unigene19736	90.48	9e-06	52	DE
	AT3G06840	Unigene39498	85.94	4e-07	56	DE
	AT3G09910	Unigene8279	79.85	6e-22	105	DE
	AT3G13810	Unigene12408	82.2	3e-62	240	DE
	AT3G15030	Unigene70394	96.88	1e-06	56	DE
	AT3G15090	Unigene17217	81.46	2e-13	77.8	DE
	AT3G15540	Unigene63659	84.88	1e-10	67.9	DE
	AT3G16120	Unigene54936	80.81	5e-18	91.7	DE
	AT3G16950	Unigene66526	81.67	2e-100	367	DE
	AT3G17860	Unigene69394	87.1	5e-17	89.7	DE
	AT3G20820	Unigene42720	84.71	6e-10	65.9	DE
	AT3G22070	Unigene15264	96.97	9e-08	58	DE
	AT3G22960	Unigene59598	80.04	2e-44	180	DE
	AT3G26590	Unigene3264	86.96	2e-16	87.7	DE
	AT3G26932	Unigene67842	89.13	6e-06	52	DE
	AT3G29370	Unigene9282	100	9e-07	54	DE
	AT3G47400	Unigene62193	93.02	1e-08	61.9	DE
	AT3G48890	Unigene66010	79.75	3e-17	89.7	DE
	AT3G51240	Unigene39641	86.25	1e-11	71.9	DE
	AT3G53800	Unigene69680	80.69	7e-22	105	DE
	AT3G58120	Unigene66710	85.5	3e-40	167	DE
	AT3G61550	Unigene14901	80.15	1e-06	54	DE
	AT4G00180	Unigene67333	80.52	1e-10	67.9	DE
	AT4G10030	Unigene55585	79.63	5e-20	99.6	DE
	AT4G13000	Unigene69520	89.66	1e-10	67.9	DE
	AT4G16155	Unigene66526	82.88	6e-122	438	DE
	AT4G16590	Unigene28460	94.29	3e-06	54	DE
	AT4G18030	Unigene68038	79.63	3e-38	161	DE
	AT4G18570	Unigene71217	83.33	1e-12	75.8	DE
	AT4G18910	Unigene16635	84.69	6e-13	75.8	DE
	AT4G21200	Unigene2702	94.12	7e-06	52	DE
	AT4G22010	Unigene14523	82.21	2e-41	170	DE
	AT4G22250	Unigene16874	84.24	8e-27	121	DE
	AT4G23820	Unigene58219	81.21	1e-14	81.8	DE
	AT4G26790	Unigene57680	94.29	3e-06	54	DE
	AT4G28640	Unigene61402	90.14	5e-16	85.7	DE
	AT4G30340	Unigene13122	79.48	9e-19	95.6	DE
	AT4G30610	Unigene46814	92.68	2e-07	58	DE
	AT4G37240	Unigene63780	91.11	8e-08	58	DE
	AT4G38950	Unigene71790	80.85	4e-16	87.7	DE
	AT5G02560	Unigene20682	88.46	3e-07	56	DE
	AT5G03670	Unigene28039	100	2e-07	58	DE
	AT5G08415	Unigene34297	84.75	1e-17	91.7	DE
	AT5G10160	Unigene65110	78.67	7e-21	101	DE
	AT5G11260	Unigene67506	87.5	2e-21	103	DE
	AT5G14410	Unigene66997	86.79	9e-06	50.1	DE
	AT5G15530	Unigene41312	81.74	1e-08	61.9	DE
	AT5G16190	Unigene21187	83.33	1e-11	71.9	DE
	AT5G16240	Unigene71349	82.23	6e-32	139	DE
	AT5G16390	Unigene56818	84.21	2e-19	97.6	DE
	AT5G16440	Unigene59470	82.47	2e-55	216	DE
	AT5G23850	Unigene13785	81.65	1e-24	115	DE
	AT5G25900	Unigene7758	87.84	8e-13	75.8	DE
	AT5G26230	Unigene66683	89.83	3e-11	69.9	DE
	AT5G35360	Unigene66568	82.96	3e-127	456	DE
	AT5G38120	Unigene71207	85.59	3e-18	93.7	DE
	AT5G40760	Unigene16069	79.57	6e-91	335	DE
	AT5G41070	Unigene7032	81.51	1e-08	61.9	DE
	AT5G44260	Unigene6197	84.33	5e-20	99.6	DE
	AT5G46540	Unigene61847	85.14	1e-07	60	DE
	AT5G46690	Unigene54695	80.37	4e-11	69.9	DE
	AT5G48880	Unigene33034	86.73	9e-22	105	DE
	AT5G48900	Unigene17226	85.1	3e-40	167	DE
	AT5G49330	Unigene18150	78.82	2e-16	87.7	DE
	AT5G49820	Unigene62282	80.46	2e-29	131	DE
	AT5G52920	Unigene68185	82.08	1e-92	341	DE
	AT5G53810	Unigene29170	94.29	3e-06	54	DE
	AT5G55400	Unigene71905	81.19	3e-22	107	DE
	AT5G55720	Unigene70934	85.52	1e-26	121	DE
	AT5G57030	Unigene63376	82.35	5e-42	172	DE
	AT5G59450	Unigene8010	86.44	4e-06	54	DE
	AT5G60850	Unigene67507	84.38	7e-19	95.6	DE
	AT5G62380	Unigene15993	79.38	3e-17	89.7	DE
	AT5G62880	Unigene13136	84.56	2e-83	309	DE
	AT5G64330	Unigene70645	80.79	3e-35	151	DE
	AT5G64850	Unigene61433	97.14	6e-09	61.9	DE
	AT1G01250	Unigene48556	84	1e-06	54	UE
	AT1G08840	Unigene64263	79.92	6e-19	97.6	UE
	AT1G11000	Unigene10459	87.14	2e-10	67.9	UE
	AT1G12460	Unigene5395	92.68	4e-07	58	UE
	AT1G66540	Unigene10908	97.37	2e-10	67.9	UE
	AT1G76620	Unigene17388	87.93	6e-08	60	UE
	AT2G16250	Unigene17850	92.5	1e-06	56	UE
	AT2G17470	Unigene54215	82.58	3e-18	93.7	UE
	AT2G22590	Unigene8551	85.54	4e-11	69.9	UE
	AT2G41760	Unigene14993	85.45	7e-18	91.7	UE
	AT3G01860	Unigene64535	100	8e-06	52	UE
	AT3G07210	Unigene17116	84.42	2e-07	58	UE
	AT3G44470	Unigene9708	92.11	1e-21	103	UE
	AT4G11140	Unigene60791	100	4e-07	56	UE
	AT4G11460	Unigene56028	94.29	4e-06	54	UE
	AT4G14750	Unigene51795	85.39	3e-12	73.8	UE
	AT4G18270	Unigene8542	81.38	3e-12	73.8	UE
	AT4G19380	Unigene5985	96.88	1e-06	56	UE
	AT4G24130	Unigene61630	82.56	5e-06	52	UE
	AT4G28900	Unigene12387	94.44	2e-06	56	UE
	AT5G04620	Unigene16370	78.96	3e-21	103	UE
	AT5G25460	Unigene7661	86.44	3e-06	54	UE
	AT5G27200	Unigene65477	87.5	2e-07	56	UE
	AT5G37550	Unigene12328	96.67	7e-06	52	UE
	AT5G39220	Unigene9745	86.89	1e-07	58	UE
	AT5G47510	Unigene37123	81.82	2e-06	54	UE
	AT5G50390	Unigene15910	83.75	9e-07	56	UE
	AT5G52390	Unigene1671	94.29	2e-06	54	UE
	AT5G60450	Unigene60316	79.8	4e-13	77.8	UE
	AT1G01630	-	-	-	-	NH
	AT1G01900	-	-	-	-	NH
	AT1G02340	-	-	-	-	NH
	AT1G02470	-	-	-	-	NH
	AT1G06000	-	-	-	-	NH
	AT1G08180	-	-	-	-	NH
	AT1G09390	-	-	-	-	NH
	AT1G10060	-	-	-	-	NH
	AT1G10370	-	-	-	-	NH
	AT1G11850	-	-	-	-	NH
	AT1G12080	-	-	-	-	NH
	AT1G12570	-	-	-	-	NH
	AT1G12845	-	-	-	-	NH
	AT1G12935	-	-	-	-	NH
	AT1G15260	-	-	-	-	NH
	AT1G17430	-	-	-	-	NH
	AT1G21060	-	-	-	-	NH
	AT1G22960	-	-	-	-	NH
	AT1G23205	-	-	-	-	NH
	AT1G24010	-	-	-	-	NH
	AT1G26290	-	-	-	-	NH
	AT1G27940	-	-	-	-	NH
	AT1G32740	-	-	-	-	NH
	AT1G32780	-	-	-	-	NH
	AT1G33130	-	-	-	-	NH
	AT1G35180	-	-	-	-	NH
	AT1G35310	-	-	-	-	NH
	AT1G42375	-	-	-	-	NH
	AT1G49520	-	-	-	-	NH
	AT1G49530	-	-	-	-	NH
	AT1G49620	-	-	-	-	NH
	AT1G52690	-	-	-	-	NH
	AT1G58430	-	-	-	-	NH
	AT1G60010	-	-	-	-	NH
	AT1G61170	-	-	-	-	NH
	AT1G61680	-	-	-	-	NH
	AT1G64405	-	-	-	-	NH
	AT1G70720	-	-	-	-	NH
	AT1G75860	-	-	-	-	NH
	AT1G79160	-	-	-	-	NH
	AT2G01150	-	-	-	-	NH
	AT2G01910	-	-	-	-	NH
	AT2G02780	-	-	-	-	NH
	AT2G07672	-	-	-	-	NH
	AT2G10140	-	-	-	-	NH
	AT2G10940	-	-	-	-	NH
	AT2G16260	-	-	-	-	NH
	AT2G16760	-	-	-	-	NH
	AT2G17300	-	-	-	-	NH
	AT2G17845	-	-	-	-	NH
	AT2G19310	-	-	-	-	NH
	AT2G20870	-	-	-	-	NH
	AT2G22960	-	-	-	-	NH
	AT2G28085	-	-	-	-	NH
	AT2G28420	-	-	-	-	NH
	AT2G32720	-	-	-	-	NH
	AT2G42990	-	-	-	-	NH
	AT2G45900	-	-	-	-	NH
	AT2G47930	-	-	-	-	NH
	AT3G01980	-	-	-	-	NH
	AT3G05020	-	-	-	-	NH
	AT3G05980	-	-	-	-	NH
	AT3G10280	-	-	-	-	NH
	AT3G10570	-	-	-	-	NH
	AT3G11210	-	-	-	-	NH
	AT3G12920	-	-	-	-	NH
	AT3G14380	-	-	-	-	NH
	AT3G17130	-	-	-	-	NH
	AT3G17611	-	-	-	-	NH
	AT3G18850	-	-	-	-	NH
	AT3G24000	-	-	-	-	NH
	AT3G24360	-	-	-	-	NH
	AT3G30560	-	-	-	-	NH
	AT3G32000	-	-	-	-	NH
	AT3G43720	-	-	-	-	NH
	AT3G44250	-	-	-	-	NH
	AT3G45230	-	-	-	-	NH
	AT3G47270	-	-	-	-	NH
	AT3G48460	-	-	-	-	NH
	AT3G48510	-	-	-	-	NH
	AT3G48550	-	-	-	-	NH
	AT3G49260	-	-	-	-	NH
	AT3G50630	-	-	-	-	NH
	AT3G51410	-	-	-	-	NH
	AT3G53300	-	-	-	-	NH
	AT3G55310	-	-	-	-	NH
	AT3G56130	-	-	-	-	NH
	AT3G56260	-	-	-	-	NH
	AT3G59430	-	-	-	-	NH
	AT3G63170	-	-	-	-	NH
	AT4G03790	-	-	-	-	NH
	AT4G04750	-	-	-	-	NH
	AT4G10240	-	-	-	-	NH
	AT4G14695	-	-	-	-	NH
	AT4G16442	-	-	-	-	NH
	AT4G18020	-	-	-	-	NH
	AT4G22730	-	-	-	-	NH
	AT4G24140	-	-	-	-	NH
	AT4G24510	-	-	-	-	NH
	AT4G27590	-	-	-	-	NH
	AT4G28040	-	-	-	-	NH
	AT4G28160	-	-	-	-	NH
	AT4G32460	-	-	-	-	NH
	AT4G33640	-	-	-	-	NH
	AT4G33800	-	-	-	-	NH
	AT4G38770	-	-	-	-	NH
	AT4G39070	-	-	-	-	NH
	AT5G02550	-	-	-	-	NH
	AT5G02890	-	-	-	-	NH
	AT5G04820	-	-	-	-	NH
	AT5G05270	-	-	-	-	NH
	AT5G08640	-	-	-	-	NH
	AT5G11420	-	-	-	-	NH
	AT5G13140	-	-	-	-	NH
	AT5G15230	-	-	-	-	NH
	AT5G15780	-	-	-	-	NH
	AT5G17030	-	-	-	-	NH
	AT5G17220	-	-	-	-	NH
	AT5G17700	-	-	-	-	NH
	AT5G22430	-	-	-	-	NH
	AT5G23940	-	-	-	-	NH
	AT5G23970	-	-	-	-	NH
	AT5G24570	-	-	-	-	NH
	AT5G25610	-	-	-	-	NH
	AT5G35670	-	-	-	-	NH
	AT5G41050	-	-	-	-	NH
	AT5G42290	-	-	-	-	NH
	AT5G42750	-	-	-	-	NH
	AT5G45530	-	-	-	-	NH
	AT5G45950	-	-	-	-	NH
	AT5G45960	-	-	-	-	NH
	AT5G47830	-	-	-	-	NH
	AT5G49170	-	-	-	-	NH
	AT5G50335	-	-	-	-	NH
	AT5G50710	-	-	-	-	NH
	AT5G53410	-	-	-	-	NH
	AT5G62210	-	-	-	-	NH
	AT5G63410	-	-	-	-	NH
Stamens	AT1G01780	Unigene11078	87.5	4e-07	56	EE
	AT1G02000	Unigene1085	77.41	4e-30	133	EE
	AT1G03050	Unigene16298	93.02	1e-08	61.9	EE
	AT1G03620	Unigene14617	90.48	1e-13	77.8	EE
	AT1G03920	Unigene70757	79.28	2e-35	151	EE
	AT1G04160	Unigene7667	80.72	6e-93	343	EE
	AT1G04500	Unigene49078	84.43	9e-28	125	EE
	AT1G04600	Unigene7667	83.64	6e-78	293	EE
	AT1G04700	Unigene9530	82.09	7e-40	167	EE
	AT1G04760	Unigene38397	86.36	3e-44	178	EE
	AT1G04880	Unigene68365	85.15	1e-14	81.8	EE
	AT1G04920	Unigene12078	78.83	5e-62	240	EE
	AT1G05630	Unigene65648	80.16	2e-67	258	EE
	AT1G06700	Unigene15781	82.17	1e-29	131	EE
	AT1G06750	Unigene44319	82.74	7e-32	139	EE
	AT1G07330	Unigene47811	93.75	8e-06	48.1	EE
	AT1G07410	Unigene12702	81.05	5e-40	165	EE
	AT1G07850	Unigene44334	83.72	5e-08	60	EE
	AT1G08340	Unigene63093	91.53	2e-13	77.8	EE
	AT1G08730	Unigene3794	84.04	3e-107	391	EE
	AT1G09910	Unigene71807	81.15	4e-18	93.7	EE
	AT1G10620	Unigene47666	86.42	4e-12	73.8	EE
	AT1G11250	Unigene17436	89.8	1e-07	58	EE
	AT1G12070	Unigene67255	91.94	1e-15	83.8	EE
	AT1G13890	Unigene68512	82.3	4e-10	65.9	EE
	AT1G14260	Unigene69596	86.11	2e-09	63.9	EE
	AT1G14420	Unigene17226	95.45	1e-11	71.9	EE
	AT1G14560	Unigene63019	83.67	2e-10	67.9	EE
	AT1G14970	Unigene338	83.57	7e-29	129	EE
	AT1G15460	Unigene4144	91.49	2e-08	61.9	EE
	AT1G15990	Unigene71953	86.15	1e-24	115	EE
	AT1G16290	Unigene41423	85	6e-06	48.1	EE
	AT1G16380	Unigene71964	93.75	9e-06	48.1	EE
	AT1G16760	Unigene55267	90.28	3e-16	87.7	EE
	AT1G17260	Unigene69390	81.24	2e-88	327	EE
	AT1G17540	Unigene70963	88.64	1e-05	48.1	EE
	AT1G17710	Unigene13407	85.37	6e-31	135	EE
	AT1G18150	Unigene18045	80.87	1e-107	391	EE
	AT1G18410	Unigene14323	81.18	8e-30	133	EE
	AT1G18750	Unigene62119	79.7	3e-12	73.8	EE
	AT1G18990	Unigene6242	84.21	1e-23	111	EE
	AT1G19780	Unigene64385	79.34	1e-21	105	EE
	AT1G19940	Unigene65311	80.89	3e-12	73.8	EE
	AT1G21070	Unigene55280	81.6	1e-23	111	EE
	AT1G22130	Unigene6064	86.52	8e-15	81.8	EE
	AT1G23540	Unigene5315	84.5	3e-19	97.6	EE
	AT1G24400	Unigene14598	84.68	9e-19	95.6	EE
	AT1G24620	Unigene54538	79.49	2e-11	69.9	EE
	AT1G26480	Unigene9390	79.1	2e-40	167	EE
	AT1G28550	Unigene68170	79.49	6e-36	151	EE
	AT1G32180	Unigene61784	83.59	4e-16	87.7	EE
	AT1G33170	Unigene12272	80.18	6e-45	182	EE
	AT1G33770	Unigene71621	83.33	1e-11	71.9	EE
	AT1G35670	Unigene61991	83.64	1e-45	184	EE
	AT1G42560	Unigene63399	82.64	3e-12	73.8	EE
	AT1G47380	Unigene50267	80.06	1e-27	125	EE
	AT1G48470	Unigene30903	84.78	1e-11	71.9	EE
	AT1G49270	Unigene15578	84.73	2e-20	101	EE
	AT1G49490	Unigene70494	83.19	5e-12	73.8	EE
	AT1G50310	Unigene17982	90	4e-08	60	EE
	AT1G52570	Unigene50421	82.57	2e-29	131	EE
	AT1G54280	Unigene14732	82.71	1e-53	212	EE
	AT1G54560	Unigene3794	79.55	5e-109	396	EE
	AT1G54870	Unigene67700	84.33	4e-20	99.6	EE
	AT1G55410	Unigene6083	98	2e-17	91.7	EE
	AT1G55560	Unigene62503	84.07	1e-14	81.8	EE
	AT1G55570	Unigene37106	84.85	2e-13	77.8	EE
	AT1G56360	Unigene29853	91.49	1e-08	61.9	EE
	AT1G58120	Unigene12684	91.78	3e-19	97.6	EE
	AT1G58210	Unigene52790	87.5	1e-13	79.8	EE
	AT1G61290	Unigene33525	81.4	5e-10	65.9	EE
	AT1G61860	Unigene12929	81.25	2e-09	63.9	EE
	AT1G62450	Unigene68643	80.51	3e-16	85.7	EE
	AT1G62990	Unigene68061	84.23	4e-51	202	EE
	AT1G64740	Unigene66472	82.87	5e-57	222	EE
	AT1G65730	Unigene65752	86.36	9e-32	139	EE
	AT1G68750	Unigene17495	81.47	2e-67	258	EE
	AT1G70430	Unigene10973	90.91	4e-15	83.8	EE
	AT1G71680	Unigene13843	87.5	4e-21	103	EE
	AT1G71770	Unigene10167	83.82	1e-05	48.1	EE
	AT1G71880	Unigene33017	89.23	4e-12	73.8	EE
	AT1G72460	Unigene17731	92.5	8e-07	56	EE
	AT1G73540	Unigene61008	85.53	2e-09	63.9	EE
	AT1G73670	Unigene18045	80.07	7e-91	335	EE
	AT1G73860	Unigene14323	78.99	2e-27	125	EE
	AT1G74490	Unigene67359	100	7e-07	56	EE
	AT1G75160	Unigene15107	96.97	2e-07	58	EE
	AT1G75790	Unigene64556	96.88	9e-07	56	EE
	AT1G77280	Unigene71750	88.76	3e-19	97.6	EE
	AT1G77410	Unigene29275	100	8e-11	69.9	EE
	AT1G77590	Unigene2061	80.57	2e-60	234	EE
	AT1G77980	Unigene56502	85.71	4e-08	60	EE
	AT1G78940	Unigene6588	90.36	1e-18	95.6	EE
	AT1G78980	Unigene51964	93.18	4e-09	63.9	EE
	AT1G79860	Unigene4287	97.06	5e-08	60	EE
	AT1G80660	Unigene71798	78.58	5e-123	442	EE
	AT2G01330	Unigene67402	87.14	2e-29	131	EE
	AT2G02720	Unigene40550	83.85	1e-17	91.7	EE
	AT2G03060	Unigene61593	85.48	9e-06	52	EE
	AT2G04220	Unigene48854	90	4e-06	48.1	EE
	AT2G07560	Unigene71798	78.95	7e-61	236	EE
	AT2G13350	Unigene64907	92.68	2e-07	58	EE
	AT2G13570	Unigene4275	85.63	6e-33	141	EE
	AT2G13620	Unigene8812	82.55	4e-28	127	EE
	AT2G13680	Unigene11158	80.6	3e-43	178	EE
	AT2G16730	Unigene58431	82.98	8e-08	60	EE
	AT2G17730	Unigene16952	79.17	3e-21	103	EE
	AT2G18100	Unigene866	79.15	9e-32	139	EE
	AT2G18180	Unigene15380	81.08	3e-92	339	EE
	AT2G18470	Unigene5315	81.75	2e-32	141	EE
	AT2G19330	Unigene69779	100	1e-10	67.9	EE
	AT2G19400	Unigene68392	78.1	4e-21	103	EE
	AT2G19770	Unigene29000	89.06	5e-12	71.9	EE
	AT2G20320	Unigene16407	85.84	5e-19	97.6	EE
	AT2G20840	Unigene60668	78.03	6e-16	85.7	EE
	AT2G21480	Unigene65519	79.66	3e-16	87.7	EE
	AT2G21540	Unigene9943	81.13	3e-34	147	EE
	AT2G21990	Unigene39296	87.04	9e-06	52	EE
	AT2G22290	Unigene57267	81.56	1e-28	127	EE
	AT2G22560	Unigene14125	90.7	4e-22	107	EE
	AT2G22950	Unigene69918	81.28	5e-80	299	EE
	AT2G24370	Unigene70963	78.4	1e-33	145	EE
	AT2G26490	Unigene7545	79.69	1e-11	71.9	EE
	AT2G28200	Unigene69487	94.29	2e-06	54	EE
	AT2G28590	Unigene56145	83.19	2e-13	77.8	EE
	AT2G29050	Unigene70776	77.9	1e-14	81.8	EE
	AT2G29940	Unigene68417	80.9	7e-40	167	EE
	AT2G30290	Unigene16692	89.09	5e-27	123	EE
	AT2G30630	Unigene44319	82.68	7e-23	109	EE
	AT2G31500	Unigene15704	79.41	4e-37	157	EE
	AT2G31830	Unigene65648	80.78	4e-50	200	EE
	AT2G32460	Unigene65766	91.11	2e-07	58	EE
	AT2G32670	Unigene38397	85.35	4e-39	163	EE
	AT2G33100	Unigene5272	79.87	1e-25	119	EE
	AT2G33240	Unigene7667	82.82	5e-69	264	EE
	AT2G33350	Unigene49078	85.63	2e-32	141	EE
	AT2G33420	Unigene17287	83.33	6e-09	63.9	EE
	AT2G33670	Unigene66787	82.44	2e-13	77.8	EE
	AT2G33870	Unigene68170	82.18	4e-25	115	EE
	AT2G35210	Unigene12873	87.25	5e-20	99.6	EE
	AT2G36190	Unigene14471	93.18	4e-09	63.9	EE
	AT2G36660	Unigene10167	80.56	4e-09	63.9	EE
	AT2G37010	Unigene16650	85.71	2e-18	95.6	EE
	AT2G38910	Unigene56444	86.6	8e-44	178	EE
	AT2G40110	Unigene11765	89.13	2e-21	103	EE
	AT2G40620	Unigene68543	80.11	1e-11	71.9	EE
	AT2G40990	Unigene16086	84.62	4e-14	79.8	EE
	AT2G41210	Unigene12196	89.05	7e-36	153	EE
	AT2G41630	Unigene40800	81.94	8e-28	125	EE
	AT2G41860	Unigene8306	80.58	2e-54	214	EE
	AT2G41970	Unigene15781	82.21	3e-77	289	EE
	AT2G43040	Unigene15031	85.41	7e-36	153	EE
	AT2G43230	Unigene15781	80.94	2e-38	161	EE
	AT2G43900	Unigene4671	88.19	4e-75	283	EE
	AT2G44590	Unigene8218	77.76	8e-26	119	EE
	AT2G45310	Unigene1085	78.28	5e-30	133	EE
	AT2G45800	Unigene11078	85.54	3e-11	69.9	EE
	AT2G46170	Unigene17894	83.33	4e-06	48.1	EE
	AT2G46860	Unigene52675	82.21	9e-39	161	EE
	AT2G47490	Unigene70365	83.04	2e-34	147	EE
	AT3G01270	Unigene67010	82.41	3e-09	63.9	EE
	AT3G02810	Unigene2677	81.76	1e-15	85.7	EE
	AT3G03800	Unigene17443	82.53	1e-38	161	EE
	AT3G03900	Unigene15143	84.35	2e-23	109	EE
	AT3G04620	Unigene43061	83.52	3e-26	119	EE
	AT3G04690	Unigene5952	80.22	6e-24	113	EE
	AT3G05140	Unigene70443	81.95	4e-12	73.8	EE
	AT3G05580	Unigene67045	80.3	3e-49	196	EE
	AT3G05610	Unigene51477	88.68	3e-07	58	EE
	AT3G05820	Unigene71565	82.32	1e-21	105	EE
	AT3G06260	Unigene71145	78.89	7e-22	105	EE
	AT3G06490	Unigene64136	80.26	3e-28	127	EE
	AT3G07070	Unigene40101	87.69	7e-10	65.9	EE
	AT3G07830	Unigene48777	90.24	1e-06	50.1	EE
	AT3G07880	Unigene68643	77.94	1e-23	111	EE
	AT3G07960	Unigene12196	79.51	3e-47	190	EE
	AT3G08560	Unigene68805	87.84	3e-13	75.8	EE
	AT3G10470	Unigene17269	87.01	3e-12	73.8	EE
	AT3G10740	Unigene52398	85.88	5e-12	73.8	EE
	AT3G11440	Unigene13700	84.68	1e-18	95.6	EE
	AT3G12160	Unigene53734	84.58	2e-42	172	EE
	AT3G13065	Unigene17888	78.48	5e-15	83.8	EE
	AT3G13390	Unigene44088	97.22	4e-09	63.9	EE
	AT3G13400	Unigene37106	85.15	1e-14	81.8	EE
	AT3G13900	Unigene14732	80.8	3e-45	184	EE
	AT3G14790	Unigene65831	82.8	4e-111	402	EE
	AT3G16150	Unigene37098	82.49	5e-29	129	EE
	AT3G17060	Unigene68798	84.16	3e-12	73.8	EE
	AT3G17630	Unigene67294	83.82	1e-18	95.6	EE
	AT3G17720	Unigene16269	80.09	7e-17	87.7	EE
	AT3G17980	Unigene40046	83.33	3e-08	60	EE
	AT3G18040	Unigene18045	81.52	3e-154	545	EE
	AT3G18810	Unigene18294	84.62	6e-14	79.8	EE
	AT3G19020	Unigene70494	90	9e-08	60	EE
	AT3G19090	Unigene937	86.57	1e-08	61.9	EE
	AT3G19390	Unigene54188	86.72	6e-26	119	EE
	AT3G19930	Unigene16218	79.64	2e-20	101	EE
	AT3G20200	Unigene6588	80.29	4e-16	87.7	EE
	AT3G20530	Unigene63267	90.48	4e-07	52	EE
	AT3G20560	Unigene63138	81.33	7e-38	159	EE
	AT3G21160	Unigene71599	79.67	1e-132	474	EE
	AT3G21180	Unigene54769	83.29	3e-63	244	EE
	AT3G21700	Unigene70521	83.25	2e-31	137	EE
	AT3G22750	Unigene69224	79.64	4e-21	103	EE
	AT3G24620	Unigene14157	83.61	3e-15	83.8	EE
	AT3G24715	Unigene9530	80.38	4e-84	313	EE
	AT3G26940	Unigene31543	94.44	8e-07	56	EE
	AT3G27440	Unigene7186	79.08	2e-13	77.8	EE
	AT3G27470	Unigene15015	83.01	2e-29	131	EE
	AT3G27930	Unigene5887	84.07	1e-14	81.8	EE
	AT3G28980	Unigene22122	100	4e-07	52	EE
	AT3G29060	Unigene6525	80.65	1e-12	75.8	EE
	AT3G29180	Unigene8574	79.46	6e-14	79.8	EE
	AT3G42640	Unigene68037	82.61	4e-127	456	EE
	AT3G42880	Unigene62915	92.68	2e-07	58	EE
	AT3G43860	Unigene71628	83.24	4e-24	113	EE
	AT3G45280	Unigene12427	85.71	1e-13	77.8	EE
	AT3G46440	Unigene61104	87.34	9e-37	155	EE
	AT3G46520	Unigene61117	83.1	4e-85	315	EE
	AT3G46750	Unigene58814	88.24	3e-06	54	EE
	AT3G48010	Unigene70996	83.12	7e-20	99.6	EE
	AT3G48450	Unigene60217	83.1	9e-06	46.1	EE
	AT3G51070	Unigene68519	82.45	1e-43	178	EE
	AT3G51470	Unigene55999	94.59	1e-07	58	EE
	AT3G52270	Unigene56068	83.78	1e-13	77.8	EE
	AT3G52600	Unigene70748	81.58	6e-08	60	EE
	AT3G52700	Unigene430	100	1e-10	67.9	EE
	AT3G53520	Unigene57630	84.9	5e-73	276	EE
	AT3G53720	Unigene71964	87.8	5e-15	83.8	EE
	AT3G53750	Unigene61117	84.35	5e-100	365	EE
	AT3G54700	Unigene71295	85.71	1e-20	101	EE
	AT3G54800	Unigene17369	84.68	1e-18	95.6	EE
	AT3G55470	Unigene11758	100	1e-19	97.6	EE
	AT3G55890	Unigene62042	90.38	1e-09	63.9	EE
	AT3G55940	Unigene18726	85.87	5e-14	79.8	EE
	AT3G56640	Unigene70597	83.46	1e-15	85.7	EE
	AT3G56960	Unigene12196	85.4	5e-24	113	EE
	AT3G57330	Unigene71729	78.5	3e-63	244	EE
	AT3G57510	Unigene3924	82.47	2e-07	58	EE
	AT3G58160	Unigene57086	81.94	3e-51	204	EE
	AT3G60330	Unigene35402	83.64	5e-34	147	EE
	AT3G61160	Unigene62588	80.94	2e-29	131	EE
	AT3G61230	Unigene11078	91.01	2e-24	113	EE
	AT3G61760	Unigene65209	87.13	1e-39	165	EE
	AT3G62590	Unigene18058	94	1e-12	75.8	EE
	AT4G00110	Unigene70637	81.85	2e-41	170	EE
	AT4G00240	Unigene70145	79.15	2e-36	155	EE
	AT4G00350	Unigene12780	79.8	2e-13	77.8	EE
	AT4G01470	Unigene471	80.69	7e-30	131	EE
	AT4G01480	Unigene52675	81.52	2e-33	143	EE
	AT4G03290	Unigene2949	88.1	1e-16	87.7	EE
	AT4G03620	Unigene1744	82.02	1e-06	50.1	EE
	AT4G04450	Unigene61050	84.43	9e-28	125	EE
	AT4G04930	Unigene11139	81.91	4e-23	109	EE
	AT4G08180	Unigene65923	82.7	2e-82	307	EE
	AT4G09740	Unigene65173	85.58	2e-16	87.7	EE
	AT4G10010	Unigene71846	81.38	4e-12	73.8	EE
	AT4G10260	Unigene13521	78.59	1e-25	117	EE
	AT4G10440	Unigene12272	83.08	2e-66	254	EE
	AT4G11030	Unigene65512	78.15	3e-19	97.6	EE
	AT4G11350	Unigene17297	80.06	2e-28	127	EE
	AT4G11830	Unigene2408	85.71	2e-18	95.6	EE
	AT4G12120	Unigene9277	79.5	1e-15	85.7	EE
	AT4G12860	Unigene43728	87.5	9e-22	103	EE
	AT4G13240	Unigene17008	89.29	3e-09	63.9	EE
	AT4G14780	Unigene49056	81.44	7e-16	85.7	EE
	AT4G17550	Unigene2360	82.22	1e-36	155	EE
	AT4G18640	Unigene11102	83.93	9e-14	79.8	EE
	AT4G18780	Unigene11980	79.19	0	712	EE
	AT4G18960	Unigene26271	83.69	2e-19	97.6	EE
	AT4G19045	Unigene39335	80.8	2e-21	103	EE
	AT4G21490	Unigene65190	79.6	1e-17	91.7	EE
	AT4G22070	Unigene61050	82.63	1e-20	101	EE
	AT4G23490	Unigene17297	82.45	9e-47	188	EE
	AT4G24580	Unigene16427	83.27	3e-44	180	EE
	AT4G24630	Unigene16086	84.14	1e-39	165	EE
	AT4G25590	Unigene1237	83.74	6e-33	141	EE
	AT4G25950	Unigene58499	88.33	7e-10	63.9	EE
	AT4G26270	Unigene64666	82.81	9e-38	159	EE
	AT4G26770	Unigene70705	79.49	2e-26	121	EE
	AT4G29130	Unigene50838	79.45	4e-21	103	EE
	AT4G29340	Unigene29000	86.89	8e-08	58	EE
	AT4G31230	Unigene60957	82.07	2e-14	81.8	EE
	AT4G32890	Unigene17524	83.61	2e-15	83.8	EE
	AT4G34440	Unigene15578	78.28	9e-35	149	EE
	AT4G34590	Unigene48392	100	9e-06	52	EE
	AT4G34940	Unigene18156	86.11	1e-18	95.6	EE
	AT4G34970	Unigene2916	82.18	9e-08	58	EE
	AT4G35010	Unigene58431	83.74	1e-15	85.7	EE
	AT4G36490	Unigene15380	81	3e-80	299	EE
	AT4G37640	Unigene69788	80.94	4e-38	161	EE
	AT4G37840	Unigene17694	96.77	3e-06	54	EE
	AT4G38190	Unigene7409	84.16	1e-31	139	EE
	AT4G39010	Unigene11770	79.13	9e-13	75.8	EE
	AT4G39110	Unigene71359	85.15	2e-14	81.8	EE
	AT4G39180	Unigene9943	81.94	1e-27	125	EE
	AT4G39610	Unigene3858	92.86	4e-14	79.8	EE
	AT4G40020	Unigene14795	88.14	1e-08	61.9	EE
	AT5G01180	Unigene66523	85.87	6e-14	79.8	EE
	AT5G03250	Unigene5197	84.46	2e-23	111	EE
	AT5G05070	Unigene16086	87.67	3e-12	73.8	EE
	AT5G06100	Unigene13700	85.71	5e-24	113	EE
	AT5G09550	Unigene70901	79.48	2e-84	313	EE
	AT5G10260	Unigene54312	81.64	9e-39	161	EE
	AT5G10660	Unigene18283	100	2e-19	97.6	EE
	AT5G12000	Unigene7262	79.57	7e-11	69.9	EE
	AT5G12180	Unigene69002	81.65	2e-90	333	EE
	AT5G13150	Unigene54378	85.14	6e-08	60	EE
	AT5G13600	Unigene8021	90.7	3e-06	54	EE
	AT5G13990	Unigene44815	97.37	3e-10	67.9	EE
	AT5G14870	Unigene70996	96	4e-15	83.8	EE
	AT5G15110	Unigene67010	83.33	1e-11	71.9	EE
	AT5G15630	Unigene17453	77.16	4e-39	163	EE
	AT5G16500	Unigene2677	82.24	3e-16	87.7	EE
	AT5G18910	Unigene16932	83.54	2e-38	161	EE
	AT5G19360	Unigene69002	81.02	6e-72	272	EE
	AT5G19610	Unigene18841	82.95	3e-14	81.8	EE
	AT5G20690	Unigene62915	94.44	9e-07	56	EE
	AT5G21050	Unigene30065	85.94	5e-07	56	EE
	AT5G23270	Unigene16240	84.72	8e-07	56	EE
	AT5G24240	Unigene71273	92.68	3e-07	58	EE
	AT5G24610	Unigene67021	86.75	9e-14	77.8	EE
	AT5G25430	Unigene13075	81.11	3e-16	87.7	EE
	AT5G25880	Unigene54275	81.7	5e-39	163	EE
	AT5G26150	Unigene7262	81.58	6e-14	79.8	EE
	AT5G27000	Unigene54	91.36	2e-21	105	EE
	AT5G27630	Unigene70459	79.94	1e-27	125	EE
	AT5G27870	Unigene68489	90.24	2e-06	50.1	EE
	AT5G28470	Unigene65931	88.89	2e-06	50.1	EE
	AT5G28680	Unigene5952	80.66	6e-27	123	EE
	AT5G35390	Unigene70944	87.93	6e-08	60	EE
	AT5G39400	Unigene71244	77.96	6e-20	99.6	EE
	AT5G39420	Unigene16858	89.66	3e-10	67.9	EE
	AT5G40645	Unigene59572	89.86	3e-15	81.8	EE
	AT5G41310	Unigene16750	79.42	3e-26	121	EE
	AT5G42340	Unigene12172	87.5	1e-06	56	EE
	AT5G43340	Unigene9991	85.87	5e-14	79.8	EE
	AT5G45840	Unigene11102	83.18	8e-11	69.9	EE
	AT5G47100	Unigene42199	85.15	9e-15	81.8	EE
	AT5G47180	Unigene16707	82.16	6e-22	105	EE
	AT5G48140	Unigene70729	91.89	1e-06	50.1	EE
	AT5G49890	Unigene71851	78.91	3e-29	131	EE
	AT5G50260	Unigene66377	89.19	3e-15	83.8	EE
	AT5G51030	Unigene68889	86.57	8e-09	61.9	EE
	AT5G51480	Unigene69385	85.92	5e-27	123	EE
	AT5G52340	Unigene66721	78.68	7e-26	119	EE
	AT5G52360	Unigene57651	83.64	3e-13	75.8	EE
	AT5G54780	Unigene15373	84.92	2e-32	141	EE
	AT5G55470	Unigene42400	85.71	7e-06	48.1	EE
	AT5G55950	Unigene7853	81.46	2e-13	77.8	EE
	AT5G56270	Unigene62332	85.31	4e-25	117	EE
	AT5G57200	Unigene13624	80.83	6e-17	89.7	EE
	AT5G57320	Unigene57397	80.75	3e-26	121	EE
	AT5G57610	Unigene62073	83.17	1e-90	335	EE
	AT5G57690	Unigene13122	80.14	2e-25	117	EE
	AT5G58380	Unigene17831	79.65	1e-21	105	EE
	AT5G59370	Unigene61117	84.55	2e-102	373	EE
	AT5G60070	Unigene68238	81.22	2e-19	97.6	EE
	AT5G60740	Unigene67757	82.55	5e-28	127	EE
	AT5G61350	Unigene65519	81.5	4e-25	117	EE
	AT5G64030	Unigene54135	82.87	1e-56	222	EE
	AT5G65090	Unigene62813	82.64	4e-12	73.8	EE
	AT5G65530	Unigene5476	80	9e-16	85.7	EE
	AT5G66020	Unigene69741	82.08	8e-44	178	EE
	AT5G66740	Unigene59416	80.88	2e-09	63.9	EE
	AT1G01500	Unigene13142	92.31	1e-11	71.9	DE
	AT1G02590	Unigene26440	100	7e-06	50.1	DE
	AT1G03260	Unigene57419	84.04	2e-10	67.9	DE
	AT1G03550	Unigene60668	88.24	2e-06	54	DE
	AT1G05790	Unigene16658	86.59	1e-12	75.8	DE
	AT1G05960	Unigene16547	82.37	1e-47	192	DE
	AT1G06050	Unigene68791	86.21	9e-06	52	DE
	AT1G07540	Unigene70214	82.98	7e-26	119	DE
	AT1G07750	Unigene41933	88.04	7e-19	95.6	DE
	AT1G08630	Unigene14889	82.35	4e-08	60	DE
	AT1G09170	Unigene15351	91.78	4e-19	97.6	DE
	AT1G09180	Unigene56153	85.03	3e-35	149	DE
	AT1G09575	Unigene17244	94.59	1e-07	58	DE
	AT1G09600	Unigene71846	81.07	7e-20	99.6	DE
	AT1G09790	Unigene17864	91.11	2e-07	58	DE
	AT1G09930	Unigene70727	83.57	1e-18	95.6	DE
	AT1G10070	Unigene63472	94.87	1e-08	61.9	DE
	AT1G10680	Unigene71864	84.87	7e-18	93.7	DE
	AT1G10740	Unigene53524	85.57	1e-14	81.8	DE
	AT1G11170	Unigene17688	84.16	3e-12	73.8	DE
	AT1G12600	Unigene65819	82.18	1e-54	214	DE
	AT1G12640	Unigene51774	82.84	3e-28	127	DE
	AT1G12780	Unigene38114	80.45	2e-13	77.8	DE
	AT1G13900	Unigene68518	87.65	2e-14	81.8	DE
	AT1G13950	Unigene4145	84.31	1e-62	240	DE
	AT1G14020	Unigene42923	84.83	4e-24	113	DE
	AT1G14530	Unigene52154	80.51	1e-05	52	DE
	AT1G14640	Unigene71512	81.65	2e-23	111	DE
	AT1G15300	Unigene70973	87.27	5e-06	54	DE
	AT1G15310	Unigene46489	86.83	2e-69	264	DE
	AT1G15470	Unigene64914	79.44	1e-20	101	DE
	AT1G15880	Unigene64108	82.08	4e-26	119	DE
	AT1G16360	Unigene50108	87.32	3e-11	69.9	DE
	AT1G18180	Unigene64504	90	3e-08	60	DE
	AT1G18530	Unigene57044	84.29	3e-06	52	DE
	AT1G19850	Unigene71923	78.41	3e-57	224	DE
	AT1G19890	Unigene12128	78.97	1e-12	73.8	DE
	AT1G19970	Unigene68766	80.51	4e-26	119	DE
	AT1G20080	Unigene69579	80.32	6e-14	79.8	DE
	AT1G21140	Unigene57935	82.08	1e-19	97.6	DE
	AT1G21790	Unigene69280	80.93	1e-26	121	DE
	AT1G22150	Unigene8896	90.77	2e-14	81.8	DE
	AT1G22200	Unigene67491	77.48	3e-21	103	DE
	AT1G22460	Unigene15309	84.4	2e-14	81.8	DE
	AT1G22650	Unigene67421	86.05	9e-13	75.8	DE
	AT1G22730	Unigene69521	86.05	6e-24	113	DE
	AT1G23190	Unigene33925	81.62	3e-19	97.6	DE
	AT1G23330	Unigene65795	89.53	6e-20	99.6	DE
	AT1G23800	Unigene17030	79.71	6e-60	232	DE
	AT1G24030	Unigene56780	82.55	1e-39	165	DE
	AT1G24330	Unigene16145	80.83	2e-23	111	DE
	AT1G25250	Unigene71205	83.44	6e-22	105	DE
	AT1G25370	Unigene28541	100	2e-06	54	DE
	AT1G25540	Unigene70421	80	5e-34	147	DE
	AT1G26320	Unigene16167	79.02	9e-12	71.9	DE
	AT1G27700	Unigene62901	87.1	3e-08	60	DE
	AT1G28470	Unigene62860	84.12	3e-27	123	DE
	AT1G29230	Unigene61836	83.33	2e-22	107	DE
	AT1G29310	Unigene32823	85	7e-38	159	DE
	AT1G32260	Unigene58305	93.48	1e-10	67.9	DE
	AT1G32850	Unigene18221	78.98	4e-25	117	DE
	AT1G33360	Unigene69026	80	8e-23	109	DE
	AT1G33430	Unigene62437	87.69	7e-10	65.9	DE
	AT1G34340	Unigene67147	83.94	2e-19	97.6	DE
	AT1G35190	Unigene8833	83.62	1e-26	121	DE
	AT1G42470	Unigene71064	78.61	2e-37	159	DE
	AT1G44100	Unigene62609	85.15	2e-14	81.8	DE
	AT1G44350	Unigene71269	79.02	3e-19	97.6	DE
	AT1G44960	Unigene6158	87.1	3e-08	60	DE
	AT1G45050	Unigene41988	83.23	3e-23	109	DE
	AT1G45545	Unigene22039	92.68	3e-07	58	DE
	AT1G47270	Unigene37655	90.14	8e-16	85.7	DE
	AT1G47750	Unigene58568	84.42	1e-07	58	DE
	AT1G48880	Unigene67055	84.87	3e-18	93.7	DE
	AT1G49160	Unigene54805	88.06	6e-11	69.9	DE
	AT1G49250	Unigene70206	83.64	9e-13	75.8	DE
	AT1G49740	Unigene69295	85.53	3e-09	63.9	DE
	AT1G50990	Unigene15037	80.14	2e-07	58	DE
	AT1G51260	Unigene69227	79.64	1e-08	61.9	DE
	AT1G51350	Unigene71534	89.36	4e-06	54	DE
	AT1G51410	Unigene52253	83.95	1e-07	58	DE
	AT1G51420	Unigene66115	85.71	6e-10	65.9	DE
	AT1G51490	Unigene71346	84.62	1e-14	81.8	DE
	AT1G51640	Unigene39775	100	1e-08	61.9	DE
	AT1G53100	Unigene64293	92	1e-20	101	DE
	AT1G53320	Unigene60242	83.16	1e-08	61.9	DE
	AT1G53650	Unigene70511	78.91	6e-35	149	DE
	AT1G54100	Unigene25775	89.13	7e-06	52	DE
	AT1G54290	Unigene19553	83.62	2e-14	79.8	DE
	AT1G54450	Unigene13019	83.17	1e-67	258	DE
	AT1G58170	Unigene67988	87.14	8e-11	67.9	DE
	AT1G59820	Unigene57872	81.73	1e-56	222	DE
	AT1G59890	Unigene17656	88.06	2e-31	139	DE
	AT1G60960	Unigene49026	85.22	3e-18	93.7	DE
	AT1G61110	Unigene70819	85.15	1e-14	81.8	DE
	AT1G61630	Unigene17111	84.85	9e-06	52	DE
	AT1G61700	Unigene54208	85.11	2e-13	75.8	DE
	AT1G61850	Unigene14807	80.85	2e-49	198	DE
	AT1G62710	Unigene65574	85.92	1e-08	61.9	DE
	AT1G63180	Unigene38114	81.66	4e-17	89.7	DE
	AT1G63210	Unigene69357	83.91	3e-08	61.9	DE
	AT1G63640	Unigene16750	80.34	8e-27	123	DE
	AT1G63910	Unigene36542	86.58	2e-31	137	DE
	AT1G64110	Unigene13771	78.69	1e-31	139	DE
	AT1G64610	Unigene69742	86.21	9e-06	52	DE
	AT1G64628	Unigene71541	83.51	3e-28	127	DE
	AT1G65430	Unigene59198	81.25	2e-23	111	DE
	AT1G65970	Unigene27827	86.15	8e-08	58	DE
	AT1G67290	Unigene71639	86.57	1e-08	61.9	DE
	AT1G67410	Unigene36008	94.87	1e-08	61.9	DE
	AT1G67530	Unigene16145	82.76	7e-33	143	DE
	AT1G67810	Unigene65993	87.04	6e-06	52	DE
	AT1G68630	Unigene14757	82.84	3e-15	83.8	DE
	AT1G69330	Unigene69395	91.8	1e-14	81.8	DE
	AT1G69430	Unigene5555	81.82	3e-24	113	DE
	AT1G70790	Unigene26720	89.29	2e-09	63.9	DE
	AT1G71160	Unigene71176	83.53	2e-07	58	DE
	AT1G71940	Unigene69154	79.59	2e-43	176	DE
	AT1G72960	Unigene71215	83.57	6e-107	389	DE
	AT1G73010	Unigene13407	83.01	1e-19	97.6	DE
	AT1G73480	Unigene16012	79.37	3e-16	87.7	DE
	AT1G73700	Unigene50297	93.88	3e-12	73.8	DE
	AT1G74210	Unigene67730	78.49	3e-21	103	DE
	AT1G74870	Unigene56329	94.12	8e-06	52	DE
	AT1G75110	Unigene71133	82.68	1e-36	155	DE
	AT1G75180	Unigene65353	94.12	6e-06	52	DE
	AT1G75388	Unigene64522	88.41	2e-12	73.8	DE
	AT1G75450	Unigene66813	83.65	2e-11	71.9	DE
	AT1G76240	Unigene4187	87.04	8e-06	52	DE
	AT1G77460	Unigene4770	79.08	1e-27	127	DE
	AT1G77840	Unigene59207	79.72	5e-14	79.8	DE
	AT1G78390	Unigene17583	82.65	6e-08	60	DE
	AT1G78530	Unigene67029	78.62	1e-29	131	DE
	AT1G79250	Unigene10959	86.21	2e-13	77.8	DE
	AT1G79450	Unigene50108	84.15	4e-08	60	DE
	AT1G79520	Unigene9737	84.67	8e-22	105	DE
	AT1G79640	Unigene10973	79.53	5e-64	246	DE
	AT1G80160	Unigene50247	92.86	2e-08	60	DE
	AT2G02810	Unigene58553	87.31	1e-29	131	DE
	AT2G02970	Unigene56150	83.75	1e-06	56	DE
	AT2G02990	Unigene23229	85.83	4e-23	109	DE
	AT2G06005	Unigene11333	77.94	2e-09	63.9	DE
	AT2G07180	Unigene8464	79.34	3e-40	167	DE
	AT2G14110	Unigene42005	91.11	9e-08	58	DE
	AT2G16750	Unigene71824	81.58	7e-08	60	DE
	AT2G17280	Unigene69324	88.33	2e-09	63.9	DE
	AT2G17530	Unigene70464	80.98	1e-36	155	DE
	AT2G17800	Unigene57037	84.16	1e-60	234	DE
	AT2G17890	Unigene53903	82.7	8e-53	208	DE
	AT2G18080	Unigene11190	82.76	1e-11	71.9	DE
	AT2G19000	Unigene62350	100	5e-09	61.9	DE
	AT2G19110	Unigene71947	88.73	5e-13	77.8	DE
	AT2G19450	Unigene71800	86.27	2e-66	254	DE
	AT2G19880	Unigene66617	80.97	2e-57	224	DE
	AT2G20900	Unigene9497	79.09	1e-42	174	DE
	AT2G21430	Unigene50181	81.07	4e-20	99.6	DE
	AT2G21510	Unigene66277	85.37	2e-10	67.9	DE
	AT2G21590	Unigene71206	83.95	6e-54	212	DE
	AT2G21770	Unigene55793	82.28	5e-34	147	DE
	AT2G21890	Unigene62327	82.66	6e-22	105	DE
	AT2G22780	Unigene56507	82.98	7e-35	149	DE
	AT2G22800	Unigene18067	86.05	3e-24	113	DE
	AT2G23170	Unigene71696	79.39	4e-21	103	DE
	AT2G23800	Unigene66057	82	6e-07	56	DE
	AT2G23900	Unigene59215	81.13	6e-06	52	DE
	AT2G24320	Unigene51958	82.61	2e-15	83.8	DE
	AT2G25530	Unigene68177	88.89	7e-20	99.6	DE
	AT2G25540	Unigene57880	80.82	4e-44	180	DE
	AT2G25880	Unigene70078	82.47	5e-78	291	DE
	AT2G25890	Unigene6234	96.77	1e-06	54	DE
	AT2G26850	Unigene3585	81.54	2e-10	67.9	DE
	AT2G28120	Unigene18280	84.88	2e-10	67.9	DE
	AT2G28680	Unigene41933	89.25	7e-22	105	DE
	AT2G30080	Unigene700	83.57	5e-19	95.6	DE
	AT2G30580	Unigene10667	90	6e-08	60	DE
	AT2G30650	Unigene17561	80.52	2e-25	117	DE
	AT2G30970	Unigene56504	79.27	3e-18	93.7	DE
	AT2G31250	Unigene70831	96.88	7e-07	56	DE
	AT2G31305	Unigene63413	87.69	6e-30	131	DE
	AT2G31350	Unigene52388	81.12	3e-24	113	DE
	AT2G31780	Unigene59198	80.7	2e-13	77.8	DE
	AT2G31940	Unigene59032	91.49	4e-09	61.9	DE
	AT2G33270	Unigene63123	88.71	1e-10	67.9	DE
	AT2G34360	Unigene20356	85.92	1e-08	61.9	DE
	AT2G34790	Unigene11666	82.11	3e-06	54	DE
	AT2G35690	Unigene65787	78.2	4e-40	167	DE
	AT2G35890	Unigene66402	81.82	2e-13	77.8	DE
	AT2G37210	Unigene14414	89.52	1e-69	264	DE
	AT2G37360	Unigene58362	83.77	6e-30	133	DE
	AT2G37670	Unigene17342	88.33	5e-09	63.9	DE
	AT2G37730	Unigene71148	87.5	7e-07	56	DE
	AT2G37980	Unigene61588	84.02	5e-27	123	DE
	AT2G38080	Unigene10101	86.15	1e-24	115	DE
	AT2G38400	Unigene47841	83.17	7e-10	65.9	DE
	AT2G38920	Unigene66374	84.81	1e-08	61.9	DE
	AT2G39720	Unigene67913	85.56	8e-13	75.8	DE
	AT2G39820	Unigene59631	88	6e-06	52	DE
	AT2G39890	Unigene10410	83.41	5e-36	153	DE
	AT2G39970	Unigene13757	91.67	1e-23	111	DE
	AT2G40010	Unigene9200	80.82	1e-60	234	DE
	AT2G41050	Unigene59350	90.74	2e-10	67.9	DE
	AT2G41190	Unigene17750	84.78	2e-11	71.9	DE
	AT2G41690	Unigene14767	83.7	1e-09	63.9	DE
	AT2G42010	Unigene70145	82.21	4e-69	264	DE
	AT2G42080	Unigene7774	94.59	1e-07	58	DE
	AT2G42890	Unigene71079	79.88	6e-09	63.9	DE
	AT2G43080	Unigene61540	81.89	3e-11	69.9	DE
	AT2G43790	Unigene61370	80.55	3e-43	176	DE
	AT2G44090	Unigene57675	81.11	1e-21	105	DE
	AT2G44260	Unigene48605	97.44	6e-11	69.9	DE
	AT2G44970	Unigene13341	79.76	3e-46	186	DE
	AT2G46030	Unigene17153	81.04	3e-29	129	DE
	AT2G46140	Unigene4899	96.77	1e-06	54	DE
	AT2G46210	Unigene64744	80.12	2e-10	67.9	DE
	AT2G46260	Unigene56413	87.13	3e-19	97.6	DE
	AT2G46270	Unigene65528	90.38	3e-09	63.9	DE
	AT2G46480	Unigene69525	85.62	6e-29	129	DE
	AT2G46500	Unigene57610	80.7	9e-06	52	DE
	AT2G46580	Unigene8266	88.46	4e-07	56	DE
	AT2G47050	Unigene31138	96.67	7e-06	52	DE
	AT2G47600	Unigene66144	81.21	2e-41	170	DE
	AT3G01040	Unigene15944	80.92	7e-48	192	DE
	AT3G01200	Unigene70452	92.86	4e-08	60	DE
	AT3G01350	Unigene71490	81.75	3e-12	73.8	DE
	AT3G01620	Unigene12717	92.5	7e-07	56	DE
	AT3G01630	Unigene17927	87.69	9e-10	65.9	DE
	AT3G01640	Unigene51707	80	2e-13	77.8	DE
	AT3G02300	Unigene66548	80.09	6e-17	89.7	DE
	AT3G03080	Unigene58886	93.18	2e-09	63.9	DE
	AT3G03250	Unigene65143	82.84	5e-73	276	DE
	AT3G03440	Unigene69931	88	2e-13	77.8	DE
	AT3G03810	Unigene69347	84.18	1e-28	129	DE
	AT3G03910	Unigene16580	79.13	4e-42	172	DE
	AT3G04080	Unigene62100	83.55	4e-21	103	DE
	AT3G05150	Unigene10538	95.12	7e-10	65.9	DE
	AT3G05170	Unigene6563	90.53	2e-25	117	DE
	AT3G05180	Unigene66102	96.88	6e-07	56	DE
	AT3G05670	Unigene71620	83.19	4e-13	77.8	DE
	AT3G05720	Unigene3378	87.69	7e-10	65.9	DE
	AT3G06860	Unigene56845	81.95	5e-46	186	DE
	AT3G07700	Unigene71336	77.57	1e-46	188	DE
	AT3G07940	Unigene12000	81.47	4e-30	133	DE
	AT3G08040	Unigene62497	84.27	9e-10	65.9	DE
	AT3G08730	Unigene66259	80	2e-60	234	DE
	AT3G09320	Unigene17543	96.88	6e-07	56	DE
	AT3G09480	Unigene11074	83.68	2e-60	232	DE
	AT3G09550	Unigene71785	80.87	3e-22	107	DE
	AT3G09760	Unigene43257	94.74	6e-08	60	DE
	AT3G10340	Unigene70376	78.94	4e-34	147	DE
	AT3G10370	Unigene5942	83.08	1e-52	208	DE
	AT3G10410	Unigene64766	79.09	2e-35	151	DE
	AT3G10540	Unigene59465	81.12	2e-47	190	DE
	AT3G11050	Unigene12247	81.65	2e-15	83.8	DE
	AT3G11180	Unigene6351	81.75	3e-12	73.8	DE
	AT3G11430	Unigene42891	82.71	2e-29	131	DE
	AT3G11850	Unigene71680	85.94	9e-07	56	DE
	AT3G12620	Unigene54165	83.65	1e-11	71.9	DE
	AT3G12690	Unigene14031	85.33	2e-08	61.9	DE
	AT3G13050	Unigene71502	82.7	4e-24	113	DE
	AT3G13782	Unigene13595	96.67	6e-06	52	DE
	AT3G14230	Unigene61325	86.92	1e-20	101	DE
	AT3G14270	Unigene9215	80	1e-79	299	DE
	AT3G14450	Unigene70511	79.96	4e-47	188	DE
	AT3G15020	Unigene67240	93.22	7e-16	85.7	DE
	AT3G15260	Unigene65515	84.62	3e-14	79.8	DE
	AT3G15510	Unigene48696	85.09	6e-29	129	DE
	AT3G16350	Unigene71194	92.45	3e-12	73.8	DE
	AT3G16920	Unigene64405	80	8e-06	52	DE
	AT3G17790	Unigene56815	89.39	7e-13	75.8	DE
	AT3G18660	Unigene64321	85.4	5e-24	113	DE
	AT3G18750	Unigene57752	83.85	2e-17	91.7	DE
	AT3G19260	Unigene67673	83.33	4e-08	60	DE
	AT3G19310	Unigene69295	87.1	4e-17	89.7	DE
	AT3G19970	Unigene9785	83.61	4e-15	83.8	DE
	AT3G20040	Unigene71163	82.55	6e-17	89.7	DE
	AT3G20300	Unigene17985	80.33	6e-06	52	DE
	AT3G22200	Unigene61667	81.17	9e-13	75.8	DE
	AT3G22360	Unigene7621	81.69	1e-35	151	DE
	AT3G22760	Unigene69077	84.21	2e-23	111	DE
	AT3G22910	Unigene33762	82.7	7e-24	113	DE
	AT3G23270	Unigene13300	85.26	4e-13	77.8	DE
	AT3G23300	Unigene71471	80.26	7e-88	325	DE
	AT3G23870	Unigene16085	83.82	4e-33	143	DE
	AT3G24090	Unigene71704	78.84	9e-41	168	DE
	AT3G24530	Unigene37226	82.06	1e-27	125	DE
	AT3G24740	Unigene47863	82.76	1e-27	125	DE
	AT3G25620	Unigene9822	79.25	2e-11	71.9	DE
	AT3G26100	Unigene56727	82.35	8e-20	99.6	DE
	AT3G26790	Unigene65915	93.02	1e-08	61.9	DE
	AT3G26820	Unigene62076	92.45	4e-12	73.8	DE
	AT3G27200	Unigene17724	92.31	1e-06	54	DE
	AT3G27290	Unigene11802	100	9e-10	65.9	DE
	AT3G27350	Unigene64035	89.8	2e-07	58	DE
	AT3G27710	Unigene70801	83.75	8e-07	56	DE
	AT3G28490	Unigene69515	83.2	7e-15	81.8	DE
	AT3G28830	Unigene17313	97.22	4e-09	63.9	DE
	AT3G28850	Unigene11802	97.37	2e-10	67.9	DE
	AT3G29070	Unigene12664	94.29	1e-06	54	DE
	AT3G29575	Unigene61100	88.51	2e-18	93.7	DE
	AT3G42850	Unigene53826	82.63	5e-37	157	DE
	AT3G45010	Unigene48839	85.39	3e-12	73.8	DE
	AT3G45870	Unigene12610	78.26	9e-12	71.9	DE
	AT3G46180	Unigene13144	77.66	1e-38	161	DE
	AT3G47080	Unigene71623	83.33	8e-06	52	DE
	AT3G47340	Unigene60347	80.77	8e-26	119	DE
	AT3G47420	Unigene57088	84.09	3e-28	127	DE
	AT3G47660	Unigene67687	94.29	5e-06	54	DE
	AT3G48780	Unigene62537	79.18	5e-24	113	DE
	AT3G50110	Unigene14848	85.19	2e-29	131	DE
	AT3G50310	Unigene12380	94	6e-13	75.8	DE
	AT3G51030	Unigene64185	89.36	1e-06	54	DE
	AT3G51490	Unigene68521	86.75	3e-13	77.8	DE
	AT3G51770	Unigene13108	78	6e-37	157	DE
	AT3G53510	Unigene58362	80.93	2e-26	121	DE
	AT3G53790	Unigene17309	85.51	1e-07	58	DE
	AT3G54240	Unigene68615	96.67	7e-06	52	DE
	AT3G54930	Unigene70749	95.92	1e-14	81.8	DE
	AT3G55050	Unigene51402	92.45	3e-12	73.8	DE
	AT3G55070	Unigene1971	85	1e-23	111	DE
	AT3G55100	Unigene67701	89.36	4e-06	54	DE
	AT3G55590	Unigene5455	77	2e-18	93.7	DE
	AT3G55730	Unigene63682	91.3	4e-08	60	DE
	AT3G56080	Unigene16316	78.5	7e-17	89.7	DE
	AT3G56170	Unigene71950	92.11	1e-05	52	DE
	AT3G56600	Unigene15919	83.72	6e-08	60	DE
	AT3G57140	Unigene71920	80.77	2e-61	238	DE
	AT3G57480	Unigene2830	78.52	5e-13	75.8	DE
	AT3G57630	Unigene18187	80.91	5e-49	196	DE
	AT3G57810	Unigene13226	88.41	2e-12	73.8	DE
	AT3G58750	Unigene60542	84.55	4e-43	176	DE
	AT3G59290	Unigene54007	82.84	2e-21	105	DE
	AT3G59830	Unigene51961	80.97	2e-25	117	DE
	AT3G60100	Unigene34434	82.61	1e-27	125	DE
	AT3G60540	Unigene40605	88.14	3e-09	61.9	DE
	AT3G60780	Unigene57051	97.14	6e-09	61.9	DE
	AT3G61070	Unigene21941	87.5	5e-07	56	DE
	AT3G61590	Unigene7089	82.41	3e-09	63.9	DE
	AT3G61900	Unigene64310	79.59	7e-07	54	DE
	AT3G61910	Unigene70879	80.57	5e-32	139	DE
	AT3G62660	Unigene52586	79.21	4e-18	93.7	DE
	AT3G62710	Unigene62749	91.11	2e-07	58	DE
	AT4G01660	Unigene15709	79.55	5e-33	143	DE
	AT4G01840	Unigene66705	85.15	1e-14	81.8	DE
	AT4G02660	Unigene17879	80.8	7e-141	504	DE
	AT4G02730	Unigene64572	81.6	6e-10	65.9	DE
	AT4G04460	Unigene49411	84.42	2e-07	58	DE
	AT4G05330	Unigene67151	86.71	2e-34	147	DE
	AT4G07960	Unigene70490	79.46	1e-68	262	DE
	AT4G08590	Unigene1070	94.44	7e-07	56	DE
	AT4G09810	Unigene14623	81.21	1e-63	244	DE
	AT4G10850	Unigene51931	91.3	3e-08	60	DE
	AT4G10955	Unigene64229	79.65	2e-42	174	DE
	AT4G11380	Unigene66668	82.75	3e-84	313	DE
	AT4G12130	Unigene70079	78.71	2e-13	77.8	DE
	AT4G12280	Unigene58869	90.36	7e-21	101	DE
	AT4G12350	Unigene11123	81.06	3e-23	109	DE
	AT4G12430	Unigene67792	88.78	2e-22	107	DE
	AT4G13700	Unigene17251	82.63	8e-25	115	DE
	AT4G13800	Unigene16085	82.67	7e-41	168	DE
	AT4G14790	Unigene1788	81.76	7e-14	79.8	DE
	AT4G14950	Unigene32423	83.13	3e-22	107	DE
	AT4G15130	Unigene60042	80	1e-26	121	DE
	AT4G15250	Unigene15826	87.88	1e-10	67.9	DE
	AT4G16110	Unigene69386	81.7	2e-27	125	DE
	AT4G16480	Unigene70175	91.38	9e-13	75.8	DE
	AT4G17650	Unigene47237	86.3	6e-10	65.9	DE
	AT4G17790	Unigene29035	83.9	3e-15	83.8	DE
	AT4G18160	Unigene16666	84.85	6e-06	52	DE
	AT4G18700	Unigene43071	86.22	4e-58	226	DE
	AT4G18790	Unigene63650	84.68	8e-16	85.7	DE
	AT4G18990	Unigene21539	83.15	1e-07	58	DE
	AT4G19230	Unigene59579	79.35	3e-28	127	DE
	AT4G19960	Unigene57035	82.89	1e-18	95.6	DE
	AT4G20460	Unigene65832	79.87	2e-44	180	DE
	AT4G22680	Unigene11123	79.08	5e-26	119	DE
	AT4G22850	Unigene3283	85.71	4e-08	60	DE
	AT4G22910	Unigene71667	78.82	2e-75	283	DE
	AT4G22960	Unigene70377	92.31	3e-06	54	DE
	AT4G23000	Unigene71804	80.6	7e-43	176	DE
	AT4G23920	Unigene68445	86.67	2e-19	97.6	DE
	AT4G24170	Unigene61468	80.84	4e-13	77.8	DE
	AT4G24380	Unigene54839	81.7	3e-26	119	DE
	AT4G24430	Unigene71807	82.98	8e-35	149	DE
	AT4G25150	Unigene69774	83.75	5e-07	56	DE
	AT4G25900	Unigene56207	94.29	2e-06	54	DE
	AT4G26260	Unigene11853	80.66	1e-38	161	DE
	AT4G26390	Unigene54171	84.07	8e-59	228	DE
	AT4G26440	Unigene62332	84	2e-22	107	DE
	AT4G26470	Unigene53959	86.32	4e-16	85.7	DE
	AT4G26650	Unigene67949	84.47	2e-26	121	DE
	AT4G26830	Unigene44742	80.3	7e-07	56	DE
	AT4G27350	Unigene65044	86.42	2e-12	73.8	DE
	AT4G27370	Unigene64089	82.12	3e-20	101	DE
	AT4G27420	Unigene71784	84.42	2e-07	58	DE
	AT4G27435	Unigene67041	87.1	2e-08	60	DE
	AT4G27480	Unigene64293	88.33	3e-09	63.9	DE
	AT4G27880	Unigene65849	80.4	2e-41	170	DE
	AT4G27910	Unigene10470	81.47	9e-42	172	DE
	AT4G28000	Unigene71256	80.34	8e-57	222	DE
	AT4G28090	Unigene14523	82.24	1e-08	61.9	DE
	AT4G28150	Unigene69972	80.41	2e-09	63.9	DE
	AT4G28500	Unigene62860	81.55	2e-16	87.7	DE
	AT4G28670	Unigene67133	96.77	3e-06	54	DE
	AT4G28700	Unigene71266	84.87	5e-26	119	DE
	AT4G30490	Unigene17573	78.16	4e-12	73.8	DE
	AT4G30940	Unigene16872	78.77	4e-52	206	DE
	AT4G32250	Unigene68113	81.97	2e-10	67.9	DE
	AT4G32630	Unigene61187	80.59	1e-12	75.8	DE
	AT4G32920	Unigene6411	83.59	6e-16	87.7	DE
	AT4G33070	Unigene59358	80.11	5e-36	153	DE
	AT4G33140	Unigene57947	79.91	3e-15	83.8	DE
	AT4G33150	Unigene57491	80.05	1e-34	149	DE
	AT4G33390	Unigene71288	84.71	1e-09	65.9	DE
	AT4G33440	Unigene41582	81.18	1e-17	91.7	DE
	AT4G33700	Unigene12665	82.06	2e-47	190	DE
	AT4G34135	Unigene17019	92.31	3e-06	54	DE
	AT4G34510	Unigene71783	80.02	3e-80	299	DE
	AT4G35500	Unigene70464	80.98	1e-42	174	DE
	AT4G35650	Unigene68778	80.11	3e-58	226	DE
	AT4G35950	Unigene57037	85.53	3e-70	266	DE
	AT4G36070	Unigene66546	85.11	2e-35	151	DE
	AT4G37280	Unigene46289	88.68	1e-07	58	DE
	AT4G37900	Unigene8389	87.72	3e-07	58	DE
	AT4G37990	Unigene5760	83.02	1e-20	101	DE
	AT4G38230	Unigene71089	78.7	2e-93	343	DE
	AT4G38390	Unigene71941	83.33	1e-18	95.6	DE
	AT4G39210	Unigene71206	81.37	1e-45	184	DE
	AT4G39870	Unigene62350	100	6e-06	52	DE
	AT4G40010	Unigene17696	79.57	7e-46	184	DE
	AT5G01290	Unigene7938	81.44	1e-15	85.7	DE
	AT5G01610	Unigene46427	83.91	6e-09	61.9	DE
	AT5G01700	Unigene62673	94.29	2e-06	54	DE
	AT5G02430	Unigene17342	79.91	1e-15	85.7	DE
	AT5G02570	Unigene11074	82.89	7e-47	186	DE
	AT5G03260	Unigene52259	80.8	4e-21	103	DE
	AT5G03690	Unigene66692	78.55	8e-22	105	DE
	AT5G04460	Unigene62764	82.54	6e-24	113	DE
	AT5G07680	Unigene16726	84	1e-38	161	DE
	AT5G08030	Unigene67730	80.1	2e-15	83.8	DE
	AT5G08200	Unigene11570	80.58	1e-08	61.9	DE
	AT5G08250	Unigene46109	81.22	6e-17	89.7	DE
	AT5G08540	Unigene14836	80.6	4e-08	60	DE
	AT5G08565	Unigene56126	86.76	1e-09	63.9	DE
	AT5G09430	Unigene71272	81.82	4e-10	65.9	DE
	AT5G09500	Unigene53704	82.3	6e-27	121	DE
	AT5G09570	Unigene106	84.51	1e-06	54	DE
	AT5G09720	Unigene68661	84.44	1e-10	67.9	DE
	AT5G10650	Unigene58695	89.83	6e-11	69.9	DE
	AT5G10730	Unigene39711	83.62	4e-14	79.8	DE
	AT5G10740	Unigene63143	80.25	1e-29	131	DE
	AT5G11100	Unigene52973	83.67	2e-10	67.9	DE
	AT5G11110	Unigene12078	86.75	4e-13	77.8	DE
	AT5G11520	Unigene46202	80.82	2e-10	67.9	DE
	AT5G12960	Unigene5453	84.21	8e-11	69.9	DE
	AT5G13490	Unigene39715	87.34	1e-36	155	DE
	AT5G13580	Unigene58362	85.19	3e-16	87.7	DE
	AT5G13820	Unigene17309	85.95	1e-21	105	DE
	AT5G14670	Unigene6919	84.49	4e-46	184	DE
	AT5G14760	Unigene62427	81.99	8e-17	89.7	DE
	AT5G14940	Unigene71490	85.25	6e-20	99.6	DE
	AT5G15070	Unigene10868	81.29	6e-148	525	DE
	AT5G15140	Unigene6083	95.45	1e-11	71.9	DE
	AT5G15470	Unigene15944	81.51	2e-54	214	DE
	AT5G15490	Unigene62805	82.68	3e-46	186	DE
	AT5G15950	Unigene41749	84.81	1e-08	61.9	DE
	AT5G16510	Unigene61674	82.8	2e-07	58	DE
	AT5G16540	Unigene53087	97.37	2e-10	67.9	DE
	AT5G17310	Unigene65143	80.59	3e-71	270	DE
	AT5G17400	Unigene15221	87.04	2e-16	87.7	DE
	AT5G18280	Unigene62100	80.59	1e-12	75.8	DE
	AT5G19280	Unigene15408	94.74	6e-08	60	DE
	AT5G19640	Unigene65851	86.02	1e-14	81.8	DE
	AT5G19900	Unigene67246	86.41	3e-40	167	DE
	AT5G20410	Unigene66993	79.95	3e-34	147	DE
	AT5G20710	Unigene61739	92.68	3e-07	58	DE
	AT5G20830	Unigene58310	82.18	9e-20	99.6	DE
	AT5G20940	Unigene63667	80.15	2e-23	111	DE
	AT5G20980	Unigene67985	81.22	2e-48	194	DE
	AT5G22030	Unigene6818	87.88	2e-30	135	DE
	AT5G22480	Unigene9625	78.02	2e-29	131	DE
	AT5G23720	Unigene17047	84.71	1e-09	65.9	DE
	AT5G24870	Unigene32417	100	2e-07	58	DE
	AT5G24940	Unigene63143	81.85	1e-41	170	DE
	AT5G25110	Unigene47029	82.11	5e-11	69.9	DE
	AT5G25400	Unigene69486	79.13	5e-81	301	DE
	AT5G25530	Unigene10717	85.71	5e-19	95.6	DE
	AT5G27520	Unigene66647	86.84	1e-11	71.9	DE
	AT5G35410	Unigene17359	84.91	3e-15	83.8	DE
	AT5G35460	Unigene18873	89.17	8e-31	135	DE
	AT5G35700	Unigene71905	78.34	6e-104	379	DE
	AT5G36260	Unigene54450	94.44	8e-07	56	DE
	AT5G38820	Unigene306	91.55	3e-18	93.7	DE
	AT5G39380	Unigene18207	82.05	4e-15	83.8	DE
	AT5G41800	Unigene69134	81.61	2e-37	157	DE
	AT5G42490	Unigene71790	97.78	3e-14	81.8	DE
	AT5G43330	Unigene51440	83.61	6e-53	208	DE
	AT5G43640	Unigene53704	81.82	9e-25	113	DE
	AT5G44030	Unigene55793	85.17	4e-47	190	DE
	AT5G45810	Unigene36933	83.67	1e-20	101	DE
	AT5G46910	Unigene71809	78.41	1e-64	248	DE
	AT5G47490	Unigene16031	80.59	3e-39	165	DE
	AT5G47520	Unigene17374	80.99	4e-45	182	DE
	AT5G47540	Unigene67895	79.59	3e-49	196	DE
	AT5G47620	Unigene57982	84.68	1e-15	85.7	DE
	AT5G48100	Unigene10101	90.57	9e-10	65.9	DE
	AT5G48270	Unigene15867	94.59	2e-07	58	DE
	AT5G49610	Unigene66646	84.21	4e-11	69.9	DE
	AT5G49900	Unigene775	80.29	9e-42	172	DE
	AT5G50400	Unigene17827	78.47	4e-43	176	DE
	AT5G51640	Unigene70410	81.2	4e-27	123	DE
	AT5G51710	Unigene17264	79.07	3e-105	383	DE
	AT5G52560	Unigene62168	79.54	3e-41	170	DE
	AT5G53360	Unigene65849	79.51	2e-34	147	DE
	AT5G53520	Unigene68777	95.45	2e-11	71.9	DE
	AT5G54080	Unigene47242	90.41	5e-17	89.7	DE
	AT5G54570	Unigene40465	83.57	8e-19	95.6	DE
	AT5G54690	Unigene1046	80.09	9e-47	188	DE
	AT5G54830	Unigene71958	80.31	2e-14	81.8	DE
	AT5G54870	Unigene71104	77.14	6e-26	119	DE
	AT5G55060	Unigene17711	84.25	3e-22	107	DE
	AT5G55930	Unigene67035	83.22	4e-19	97.6	DE
	AT5G55970	Unigene439	88.41	3e-12	73.8	DE
	AT5G56160	Unigene55398	89.8	2e-07	58	DE
	AT5G56450	Unigene69751	83.21	8e-16	85.7	DE
	AT5G56640	Unigene11853	79.8	3e-36	153	DE
	AT5G56750	Unigene71210	80.44	3e-49	196	DE
	AT5G57300	Unigene69943	81.43	8e-12	71.9	DE
	AT5G57655	Unigene265	86.14	6e-17	89.7	DE
	AT5G57740	Unigene6135	82.35	7e-17	89.7	DE
	AT5G58160	Unigene69062	78.72	1e-10	69.9	DE
	AT5G58170	Unigene65755	92.11	1e-05	52	DE
	AT5G58190	Unigene43691	82.42	3e-06	54	DE
	AT5G59570	Unigene14646	85.12	9e-31	135	DE
	AT5G59590	Unigene70336	100	3e-06	54	DE
	AT5G59840	Unigene55300	81.14	1e-41	170	DE
	AT5G60010	Unigene61873	84.85	1e-28	129	DE
	AT5G60020	Unigene9309	84.02	2e-26	121	DE
	AT5G60220	Unigene64022	90	3e-08	60	DE
	AT5G61430	Unigene16726	80.35	9e-34	145	DE
	AT5G61620	Unigene6237	84.95	2e-12	73.8	DE
	AT5G61730	Unigene6451	81.21	6e-27	123	DE
	AT5G61960	Unigene68836	81.05	3e-39	165	DE
	AT5G62250	Unigene69034	88.46	7e-07	56	DE
	AT5G62310	Unigene71983	79.53	3e-17	91.7	DE
	AT5G62500	Unigene9242	80.07	5e-26	119	DE
	AT5G63220	Unigene65086	82.93	9e-06	52	DE
	AT5G64510	Unigene16182	97.22	3e-09	63.9	DE
	AT5G64570	Unigene10508	79.45	3e-44	180	DE
	AT5G65110	Unigene70860	79.85	2e-69	264	DE
	AT5G65280	Unigene60189	90.57	7e-10	65.9	DE
	AT5G65290	Unigene11366	81.62	1e-108	394	DE
	AT5G65380	Unigene71116	80	2e-19	97.6	DE
	AT5G65810	Unigene43253	85.51	1e-07	58	DE
	AT5G66150	Unigene72012	82.58	1e-13	79.8	DE
	AT5G66550	Unigene51666	83.72	2e-08	60	DE
	AT5G67520	Unigene45838	83.92	1e-20	101	DE
	AT1G08170	Unigene11758	90.48	5e-06	52	UE
	AT1G11770	Unigene51816	100	5e-08	60	UE
	AT1G13130	Unigene12192	81.97	2e-10	67.9	UE
	AT1G13290	Unigene13330	88.41	2e-12	73.8	UE
	AT1G18610	Unigene5435	83.64	1e-12	75.8	UE
	AT1G20120	Unigene47996	90.91	6e-07	56	UE
	AT1G22275	Unigene68826	82.43	4e-16	87.7	UE
	AT1G27920	Unigene69817	87.1	5e-08	60	UE
	AT1G29750	Unigene18177	84.21	1e-10	69.9	UE
	AT1G30810	Unigene13209	91.55	8e-18	93.7	UE
	AT1G51210	Unigene16953	87.5	6e-07	56	UE
	AT1G52920	Unigene13856	79.13	3e-15	83.8	UE
	AT1G56160	Unigene17034	89.8	1e-07	58	UE
	AT1G64300	Unigene58853	92.73	3e-13	77.8	UE
	AT1G71370	Unigene71744	88.89	6e-17	89.7	UE
	AT1G73850	Unigene14920	81.11	6e-14	79.8	UE
	AT1G74860	Unigene16724	83.72	4e-08	60	UE
	AT1G78160	Unigene2827	88.46	9e-07	56	UE
	AT2G01460	Unigene17101	78.09	3e-63	244	UE
	AT2G01770	Unigene61412	80.11	2e-36	153	UE
	AT2G03210	Unigene1651	77.81	2e-13	77.8	UE
	AT2G16130	Unigene53569	85.71	2e-13	77.8	UE
	AT2G18260	Unigene32334	87.5	5e-07	56	UE
	AT2G19010	Unigene38156	94.44	4e-07	56	UE
	AT2G25600	Unigene11193	94.29	5e-06	54	UE
	AT2G27120	Unigene50753	83.06	4e-36	155	UE
	AT2G28130	Unigene17569	96.88	8e-07	56	UE
	AT2G29620	Unigene15194	84.09	5e-09	63.9	UE
	AT2G30690	Unigene65905	82.4	4e-12	73.8	UE
	AT2G40460	Unigene59375	92.13	2e-26	121	UE
	AT2G41850	Unigene65636	100	3e-06	54	UE
	AT2G43870	Unigene12617	92.11	8e-06	52	UE
	AT2G44560	Unigene14987	87.5	7e-07	56	UE
	AT2G45040	Unigene63161	87.1	4e-08	60	UE
	AT3G11040	Unigene70738	84.54	3e-34	147	UE
	AT3G15620	Unigene66258	83.14	2e-23	111	UE
	AT3G16320	Unigene8561	82.95	1e-06	56	UE
	AT3G18360	Unigene63192	96.77	1e-06	54	UE
	AT3G21420	Unigene70839	81.16	5e-26	119	UE
	AT3G23790	Unigene13619	80.41	3e-28	127	UE
	AT3G25290	Unigene14612	89.58	6e-07	56	UE
	AT3G26125	Unigene52344	92.5	7e-07	56	UE
	AT3G28790	Unigene6426	92.31	4e-06	54	UE
	AT3G43930	Unigene2941	92.86	5e-08	60	UE
	AT3G45810	Unigene61873	84.18	1e-28	129	UE
	AT3G47940	Unigene10664	89.36	3e-06	54	UE
	AT3G48770	Unigene34716	86.92	5e-20	101	UE
	AT3G50120	Unigene45815	89.71	5e-14	79.8	UE
	AT3G50220	Unigene66463	100	9e-06	52	UE
	AT3G51290	Unigene44264	85.53	4e-09	63.9	UE
	AT3G57390	Unigene14122	88.24	2e-06	54	UE
	AT4G02900	Unigene5161	91.23	4e-12	73.8	UE
	AT4G14368	Unigene55707	96.88	2e-06	56	UE
	AT4G16745	Unigene70966	90.54	2e-17	91.7	UE
	AT4G18050	Unigene518	92	4e-10	67.9	UE
	AT4G20160	Unigene67852	100	6e-06	54	UE
	AT4G22790	Unigene18013	95.12	8e-10	65.9	UE
	AT4G23660	Unigene4753	86.76	3e-09	63.9	UE
	AT4G23895	Unigene52703	78.95	8e-12	71.9	UE
	AT4G25780	Unigene67156	88.46	4e-07	56	UE
	AT4G26930	Unigene17034	91.11	1e-07	58	UE
	AT4G30860	Unigene66524	78.51	3e-09	63.9	UE
	AT4G34310	Unigene1920	81.22	7e-80	299	UE
	AT4G35890	Unigene18033	100	4e-06	54	UE
	AT5G08480	Unigene17508	84.85	6e-06	52	UE
	AT5G08750	Unigene70868	81.68	1e-20	101	UE
	AT5G09790	Unigene70006	89.36	2e-06	54	UE
	AT5G10500	Unigene68855	84.78	2e-11	71.9	UE
	AT5G19380	Unigene20788	84.27	9e-10	65.9	UE
	AT5G20110	Unigene63856	84.55	1e-15	83.8	UE
	AT5G24090	Unigene10580	89.13	8e-06	52	UE
	AT5G28960	Unigene19634	83.02	2e-10	67.9	UE
	AT5G30500	Unigene3096	80.73	3e-20	99.6	UE
	AT5G37810	Unigene48183	88	6e-06	52	UE
	AT5G41730	Unigene58853	82.52	2e-08	61.9	UE
	AT5G42170	Unigene6099	94.12	8e-06	52	UE
	AT5G46050	Unigene71749	86.96	2e-16	87.7	UE
	AT5G50170	Unigene7993	81.95	6e-12	73.8	UE
	AT5G55980	Unigene32232	91.11	4e-08	58	UE
	AT5G58760	Unigene2314	79.22	3e-31	137	UE
	AT5G60250	Unigene65028	88.14	2e-08	61.9	UE
	AT5G61700	Unigene14498	88.52	1e-09	65.9	UE
	AT5G61980	Unigene16637	78.21	8e-33	143	UE
	AT1G01070	-	-	-	-	NH
	AT1G01310	-	-	-	-	NH
	AT1G01460	-	-	-	-	NH
	AT1G01980	-	-	-	-	NH
	AT1G02790	-	-	-	-	NH
	AT1G03070	-	-	-	-	NH
	AT1G04090	-	-	-	-	NH
	AT1G04290	-	-	-	-	NH
	AT1G04540	-	-	-	-	NH
	AT1G04670	-	-	-	-	NH
	AT1G04990	-	-	-	-	NH
	AT1G05020	-	-	-	-	NH
	AT1G05040	-	-	-	-	NH
	AT1G05290	-	-	-	-	NH
	AT1G05340	-	-	-	-	NH
	AT1G05577	-	-	-	-	NH
	AT1G06170	-	-	-	-	NH
	AT1G06250	-	-	-	-	NH
	AT1G06260	-	-	-	-	NH
	AT1G06450	-	-	-	-	NH
	AT1G06970	-	-	-	-	NH
	AT1G06990	-	-	-	-	NH
	AT1G07120	-	-	-	-	NH
	AT1G07340	-	-	-	-	NH
	AT1G07795	-	-	-	-	NH
	AT1G07980	-	-	-	-	NH
	AT1G08030	-	-	-	-	NH
	AT1G08065	-	-	-	-	NH
	AT1G08135	-	-	-	-	NH
	AT1G08860	-	-	-	-	NH
	AT1G09155	-	-	-	-	NH
	AT1G09380	-	-	-	-	NH
	AT1G09510	-	-	-	-	NH
	AT1G09610	-	-	-	-	NH
	AT1G10650	-	-	-	-	NH
	AT1G10770	-	-	-	-	NH
	AT1G10970	-	-	-	-	NH
	AT1G11040	-	-	-	-	NH
	AT1G11190	-	-	-	-	NH
	AT1G11560	-	-	-	-	NH
	AT1G11570	-	-	-	-	NH
	AT1G11610	-	-	-	-	NH
	AT1G11990	-	-	-	-	NH
	AT1G12150	-	-	-	-	NH
	AT1G12450	-	-	-	-	NH
	AT1G12490	-	-	-	-	NH
	AT1G13140	-	-	-	-	NH
	AT1G13150	-	-	-	-	NH
	AT1G13970	-	-	-	-	NH
	AT1G15350	-	-	-	-	NH
	AT1G15920	-	-	-	-	NH
	AT1G17950	-	-	-	-	NH
	AT1G18280	-	-	-	-	NH
	AT1G18520	-	-	-	-	NH
	AT1G19090	-	-	-	-	NH
	AT1G19500	-	-	-	-	NH
	AT1G19640	-	-	-	-	NH
	AT1G20135	-	-	-	-	NH
	AT1G20280	-	-	-	-	NH
	AT1G20440	-	-	-	-	NH
	AT1G21010	-	-	-	-	NH
	AT1G21670	-	-	-	-	NH
	AT1G22010	-	-	-	-	NH
	AT1G22015	-	-	-	-	NH
	AT1G22110	-	-	-	-	NH
	AT1G22240	-	-	-	-	NH
	AT1G22720	-	-	-	-	NH
	AT1G22760	-	-	-	-	NH
	AT1G23070	-	-	-	-	NH
	AT1G23200	-	-	-	-	NH
	AT1G23240	-	-	-	-	NH
	AT1G23250	-	-	-	-	NH
	AT1G23350	-	-	-	-	NH
	AT1G23510	-	-	-	-	NH
	AT1G23520	-	-	-	-	NH
	AT1G23560	-	-	-	-	NH
	AT1G23570	-	-	-	-	NH
	AT1G23580	-	-	-	-	NH
	AT1G23590	-	-	-	-	NH
	AT1G23600	-	-	-	-	NH
	AT1G23610	-	-	-	-	NH
	AT1G23640	-	-	-	-	NH
	AT1G23650	-	-	-	-	NH
	AT1G23670	-	-	-	-	NH
	AT1G23690	-	-	-	-	NH
	AT1G23730	-	-	-	-	NH
	AT1G23750	-	-	-	-	NH
	AT1G24520	-	-	-	-	NH
	AT1G24600	-	-	-	-	NH
	AT1G24938	-	-	-	-	NH
	AT1G25230	-	-	-	-	NH
	AT1G25240	-	-	-	-	NH
	AT1G25470	-	-	-	-	NH
	AT1G26590	-	-	-	-	NH
	AT1G26610	-	-	-	-	NH
	AT1G26710	-	-	-	-	NH
	AT1G26820	-	-	-	-	NH
	AT1G26840	-	-	-	-	NH
	AT1G27720	-	-	-	-	NH
	AT1G27930	-	-	-	-	NH
	AT1G28270	-	-	-	-	NH
	AT1G28375	-	-	-	-	NH
	AT1G28430	-	-	-	-	NH
	AT1G28500	-	-	-	-	NH
	AT1G29140	-	-	-	-	NH
	AT1G29200	-	-	-	-	NH
	AT1G29760	-	-	-	-	NH
	AT1G30350	-	-	-	-	NH
	AT1G30710	-	-	-	-	NH
	AT1G30740	-	-	-	-	NH
	AT1G31720	-	-	-	-	NH
	AT1G31750	-	-	-	-	NH
	AT1G31814	-	-	-	-	NH
	AT1G32250	-	-	-	-	NH
	AT1G32320	-	-	-	-	NH
	AT1G34660	-	-	-	-	NH
	AT1G35410	-	-	-	-	NH
	AT1G35490	-	-	-	-	NH
	AT1G42605	-	-	-	-	NH
	AT1G43000	-	-	-	-	NH
	AT1G43205	-	-	-	-	NH
	AT1G43630	-	-	-	-	NH
	AT1G44120	-	-	-	-	NH
	AT1G44160	-	-	-	-	NH
	AT1G44224	-	-	-	-	NH
	AT1G47280	-	-	-	-	NH
	AT1G47610	-	-	-	-	NH
	AT1G47980	-	-	-	-	NH
	AT1G49290	-	-	-	-	NH
	AT1G50290	-	-	-	-	NH
	AT1G50610	-	-	-	-	NH
	AT1G51240	-	-	-	-	NH
	AT1G51915	-	-	-	-	NH
	AT1G52580	-	-	-	-	NH
	AT1G52680	-	-	-	-	NH
	AT1G53790	-	-	-	-	NH
	AT1G54070	-	-	-	-	NH
	AT1G54240	-	-	-	-	NH
	AT1G54260	-	-	-	-	NH
	AT1G54550	-	-	-	-	NH
	AT1G54860	-	-	-	-	NH
	AT1G54920	-	-	-	-	NH
	AT1G55190	-	-	-	-	NH
	AT1G57550	-	-	-	-	NH
	AT1G60240	-	-	-	-	NH
	AT1G60610	-	-	-	-	NH
	AT1G61080	-	-	-	-	NH
	AT1G61566	-	-	-	-	NH
	AT1G61940	-	-	-	-	NH
	AT1G62690	-	-	-	-	NH
	AT1G63060	-	-	-	-	NH
	AT1G63190	-	-	-	-	NH
	AT1G63200	-	-	-	-	NH
	AT1G63220	-	-	-	-	NH
	AT1G63930	-	-	-	-	NH
	AT1G64320	-	-	-	-	NH
	AT1G64480	-	-	-	-	NH
	AT1G64800	-	-	-	-	NH
	AT1G65240	-	-	-	-	NH
	AT1G65690	-	-	-	-	NH
	AT1G66210	-	-	-	-	NH
	AT1G66360	-	-	-	-	NH
	AT1G66850	-	-	-	-	NH
	AT1G67070	-	-	-	-	NH
	AT1G67540	-	-	-	-	NH
	AT1G67570	-	-	-	-	NH
	AT1G68090	-	-	-	-	NH
	AT1G68110	-	-	-	-	NH
	AT1G68290	-	-	-	-	NH
	AT1G68610	-	-	-	-	NH
	AT1G68700	-	-	-	-	NH
	AT1G68875	-	-	-	-	NH
	AT1G69050	-	-	-	-	NH
	AT1G69940	-	-	-	-	NH
	AT1G70170	-	-	-	-	NH
	AT1G70540	-	-	-	-	NH
	AT1G70670	-	-	-	-	NH
	AT1G70920	-	-	-	-	NH
	AT1G72070	-	-	-	-	NH
	AT1G72100	-	-	-	-	NH
	AT1G73220	-	-	-	-	NH
	AT1G73410	-	-	-	-	NH
	AT1G73630	-	-	-	-	NH
	AT1G74000	-	-	-	-	NH
	AT1G74010	-	-	-	-	NH
	AT1G74020	-	-	-	-	NH
	AT1G74130	-	-	-	-	NH
	AT1G74220	-	-	-	-	NH
	AT1G74410	-	-	-	-	NH
	AT1G74540	-	-	-	-	NH
	AT1G74550	-	-	-	-	NH
	AT1G74780	-	-	-	-	NH
	AT1G75620	-	-	-	-	NH
	AT1G75870	-	-	-	-	NH
	AT1G75910	-	-	-	-	NH
	AT1G75920	-	-	-	-	NH
	AT1G75930	-	-	-	-	NH
	AT1G75940	-	-	-	-	NH
	AT1G76250	-	-	-	-	NH
	AT1G76370	-	-	-	-	NH
	AT1G77730	-	-	-	-	NH
	AT1G77770	-	-	-	-	NH
	AT1G78110	-	-	-	-	NH
	AT1G78460	-	-	-	-	NH
	AT1G79400	-	-	-	-	NH
	AT1G79780	-	-	-	-	NH
	AT1G79800	-	-	-	-	NH
	AT1G79900	-	-	-	-	NH
	AT1G79910	-	-	-	-	NH
	AT1G80110	-	-	-	-	NH
	AT1G80960	-	-	-	-	NH
	AT2G01810	-	-	-	-	NH
	AT2G02140	-	-	-	-	NH
	AT2G02660	-	-	-	-	NH
	AT2G03410	-	-	-	-	NH
	AT2G03520	-	-	-	-	NH
	AT2G03630	-	-	-	-	NH
	AT2G03740	-	-	-	-	NH
	AT2G03830	-	-	-	-	NH
	AT2G03850	-	-	-	-	NH
	AT2G04020	-	-	-	-	NH
	AT2G04460	-	-	-	-	NH
	AT2G04670	-	-	-	-	NH
	AT2G04675	-	-	-	-	NH
	AT2G05160	-	-	-	-	NH
	AT2G05850	-	-	-	-	NH
	AT2G07040	-	-	-	-	NH
	AT2G10970	-	-	-	-	NH
	AT2G12190	-	-	-	-	NH
	AT2G14095	-	-	-	-	NH
	AT2G14800	-	-	-	-	NH
	AT2G15340	-	-	-	-	NH
	AT2G15535	-	-	-	-	NH
	AT2G15640	-	-	-	-	NH
	AT2G15650	-	-	-	-	NH
	AT2G15880	-	-	-	-	NH
	AT2G16030	-	-	-	-	NH
	AT2G16040	-	-	-	-	NH
	AT2G16360	-	-	-	-	NH
	AT2G16450	-	-	-	-	NH
	AT2G16890	-	-	-	-	NH
	AT2G16910	-	-	-	-	NH
	AT2G16990	-	-	-	-	NH
	AT2G17090	-	-	-	-	NH
	AT2G17180	-	-	-	-	NH
	AT2G17940	-	-	-	-	NH
	AT2G17950	-	-	-	-	NH
	AT2G18340	-	-	-	-	NH
	AT2G18420	-	-	-	-	NH
	AT2G18480	-	-	-	-	NH
	AT2G18600	-	-	-	-	NH
	AT2G19070	-	-	-	-	NH
	AT2G19500	-	-	-	-	NH
	AT2G19610	-	-	-	-	NH
	AT2G19980	-	-	-	-	NH
	AT2G20430	-	-	-	-	NH
	AT2G20700	-	-	-	-	NH
	AT2G21130	-	-	-	-	NH
	AT2G21490	-	-	-	-	NH
	AT2G22180	-	-	-	-	NH
	AT2G22340	-	-	-	-	NH
	AT2G22690	-	-	-	-	NH
	AT2G23510	-	-	-	-	NH
	AT2G23660	-	-	-	-	NH
	AT2G23970	-	-	-	-	NH
	AT2G24450	-	-	-	-	NH
	AT2G24660	-	-	-	-	NH
	AT2G26410	-	-	-	-	NH
	AT2G26450	-	-	-	-	NH
	AT2G27180	-	-	-	-	NH
	AT2G27830	-	-	-	-	NH
	AT2G28180	-	-	-	-	NH
	AT2G28355	-	-	-	-	NH
	AT2G28400	-	-	-	-	NH
	AT2G28440	-	-	-	-	NH
	AT2G28640	-	-	-	-	NH
	AT2G29040	-	-	-	-	NH
	AT2G29410	-	-	-	-	NH
	AT2G29790	-	-	-	-	NH
	AT2G29880	-	-	-	-	NH
	AT2G30240	-	-	-	-	NH
	AT2G30940	-	-	-	-	NH
	AT2G31100	-	-	-	-	NH
	AT2G31130	-	-	-	-	NH
	AT2G31470	-	-	-	-	NH
	AT2G31980	-	-	-	-	NH
	AT2G32890	-	-	-	-	NH
	AT2G32930	-	-	-	-	NH
	AT2G33320	-	-	-	-	NH
	AT2G33460	-	-	-	-	NH
	AT2G33690	-	-	-	-	NH
	AT2G34440	-	-	-	-	NH
	AT2G34920	-	-	-	-	NH
	AT2G35070	-	-	-	-	NH
	AT2G35300	-	-	-	-	NH
	AT2G36020	-	-	-	-	NH
	AT2G37070	-	-	-	-	NH
	AT2G37610	-	-	-	-	NH
	AT2G38240	-	-	-	-	NH
	AT2G38360	-	-	-	-	NH
	AT2G38500	-	-	-	-	NH
	AT2G38905	-	-	-	-	NH
	AT2G39510	-	-	-	-	NH
	AT2G39725	-	-	-	-	NH
	AT2G40180	-	-	-	-	NH
	AT2G40670	-	-	-	-	NH
	AT2G40680	-	-	-	-	NH
	AT2G40790	-	-	-	-	NH
	AT2G41230	-	-	-	-	NH
	AT2G41400	-	-	-	-	NH
	AT2G41590	-	-	-	-	NH
	AT2G42140	-	-	-	-	NH
	AT2G42180	-	-	-	-	NH
	AT2G43270	-	-	-	-	NH
	AT2G43690	-	-	-	-	NH
	AT2G43840	-	-	-	-	NH
	AT2G45580	-	-	-	-	NH
	AT2G45610	-	-	-	-	NH
	AT2G46000	-	-	-	-	NH
	AT2G46300	-	-	-	-	NH
	AT2G46360	-	-	-	-	NH
	AT2G46950	-	-	-	-	NH
	AT2G47040	-	-	-	-	NH
	AT2G47120	-	-	-	-	NH
	AT2G47340	-	-	-	-	NH
	AT2G47670	-	-	-	-	NH
	AT2G47770	-	-	-	-	NH
	AT2G48150	-	-	-	-	NH
	AT3G01015	-	-	-	-	NH
	AT3G01020	-	-	-	-	NH
	AT3G01240	-	-	-	-	NH
	AT3G01250	-	-	-	-	NH
	AT3G01330	-	-	-	-	NH
[truncated: 4,414 more rows]

## Sheet: Table S7D
Table S7D. Homologous comparison via BLAST rearches against the Arabidopsis genome database using the transcripts enriched in the three types of vetch petals. This table displays the corresponding detailed information for the Table C in Table S7A. a, Information of corresponding Arabidopsis sequences when BLAST against the Arabidopsis genome database using the vetch sequences; EE, enriched expres…
Organs	Query ID of vetch	Subject ID of Arabidopsis	Identity(%)a	E-valuea	Scorea	Expression pattern
Dorsal petals	Unigene36178	AT4G28110	86.54	2e-19	95.6	EE
	Unigene38627	AT5G23950	100	6e-07	54	EE
	Unigene47850	AT5G25900	100	9e-06	44.1	EE
	Unigene58151	AT2G26580	85.2	3e-38	159	EE
	Unigene6190	AT2G47260	87.1	3e-17	89.7	EE
	Unigene65616	AT3G45890	79.31	3e-08	60	EE
	Unigene23533	AT5G50000	85.63	2e-33	141	DE
	Unigene26292	AT5G60020	84.06	7e-06	50.1	DE
	Unigene2663	AT4G27910	86.36	8e-31	133	DE
	Unigene32124	AT4G22200	85.84	4e-20	97.6	DE
	Unigene32652	AT2G29070	93.1	6e-16	83.8	DE
	Unigene33877	AT2G26580	87.79	7e-31	133	DE
	Unigene339	AT4G22200	89.47	8e-17	87.7	DE
	Unigene37515	AT3G17660	81.94	1e-14	79.8	DE
	Unigene38864	AT4G22200	87.69	2e-10	65.9	DE
	Unigene44273	AT3G05030	87.84	2e-13	75.8	DE
	Unigene4613	AT4G31570	100	2e-09	63.9	DE
	Unigene47839	AT1G24764	92.11	3e-06	52	DE
	Unigene48488	AT2G28520	96.55	5e-06	50.1	DE
	Unigene48501	AT1G24764	85.32	9e-53	206	DE
	Unigene52302	AT3G01490	81.53	3e-25	115	DE
	Unigene54892	AT1G24764	82.93	1e-21	103	DE
	Unigene57221	AT2G28950	85.42	2e-14	79.8	DE
	Unigene57289	AT1G68060	86.11	3e-19	95.6	DE
	Unigene5954	AT4G29210	87.5	2e-07	56	DE
	Unigene63073	AT5G50000	85.16	2e-21	103	DE
	Unigene63856	AT5G20110	84.55	2e-15	83.8	DE
	Unigene9806	AT5G40640	85.96	7e-06	50.1	DE
	Unigene12617	AT3G07970	92.11	5e-06	52	UE
	Unigene19294	AT4G06658	86.21	3e-14	77.8	UE
	Unigene44045	AT1G68800	84.42	4e-08	58	UE
	Unigene64291	AT5G51490	84.72	4e-07	56	UE
	Unigene66320	AT5G17450	90.48	1e-13	77.8	UE
	Unigene66821	AT5G05840	80.43	3e-08	60	UE
	Unigene67536	AT5G37820	89.13	9e-06	52	UE
	Unigene71237	AT3G45890	81.79	1e-40	168	UE
	Unigene7365	AT2G47260	93.02	6e-09	61.9	UE
	Unigene8956	AT3G45780	83.05	1e-57	226	UE
	Unigene1013	-	-	-	-	NH
	Unigene10188	-	-	-	-	NH
	Unigene10486	-	-	-	-	NH
	Unigene1117	-	-	-	-	NH
	Unigene11335	-	-	-	-	NH
	Unigene11974	-	-	-	-	NH
	Unigene12062	-	-	-	-	NH
	Unigene12131	-	-	-	-	NH
	Unigene12201	-	-	-	-	NH
	Unigene1223	-	-	-	-	NH
	Unigene12543	-	-	-	-	NH
	Unigene1267	-	-	-	-	NH
	Unigene1268	-	-	-	-	NH
	Unigene12884	-	-	-	-	NH
	Unigene13004	-	-	-	-	NH
	Unigene13281	-	-	-	-	NH
	Unigene1332	-	-	-	-	NH
	Unigene13533	-	-	-	-	NH
	Unigene13706	-	-	-	-	NH
	Unigene15499	-	-	-	-	NH
	Unigene1602	-	-	-	-	NH
	Unigene16189	-	-	-	-	NH
	Unigene168	-	-	-	-	NH
	Unigene1746	-	-	-	-	NH
	Unigene1753	-	-	-	-	NH
	Unigene17589	-	-	-	-	NH
	Unigene18300	-	-	-	-	NH
	Unigene18323	-	-	-	-	NH
	Unigene18348	-	-	-	-	NH
	Unigene18380	-	-	-	-	NH
	Unigene18420	-	-	-	-	NH
	Unigene1847	-	-	-	-	NH
	Unigene18551	-	-	-	-	NH
	Unigene18564	-	-	-	-	NH
	Unigene18569	-	-	-	-	NH
	Unigene18602	-	-	-	-	NH
	Unigene18711	-	-	-	-	NH
	Unigene18756	-	-	-	-	NH
	Unigene1886	-	-	-	-	NH
	Unigene18889	-	-	-	-	NH
	Unigene18899	-	-	-	-	NH
	Unigene18902	-	-	-	-	NH
	Unigene18969	-	-	-	-	NH
	Unigene18988	-	-	-	-	NH
	Unigene19059	-	-	-	-	NH
	Unigene19062	-	-	-	-	NH
	Unigene19097	-	-	-	-	NH
	Unigene19118	-	-	-	-	NH
	Unigene19146	-	-	-	-	NH
	Unigene19322	-	-	-	-	NH
	Unigene19373	-	-	-	-	NH
	Unigene1944	-	-	-	-	NH
	Unigene19503	-	-	-	-	NH
	Unigene19508	-	-	-	-	NH
	Unigene19668	-	-	-	-	NH
	Unigene20123	-	-	-	-	NH
	Unigene20154	-	-	-	-	NH
	Unigene20202	-	-	-	-	NH
	Unigene20217	-	-	-	-	NH
	Unigene20267	-	-	-	-	NH
	Unigene20329	-	-	-	-	NH
	Unigene20355	-	-	-	-	NH
	Unigene20443	-	-	-	-	NH
	Unigene20520	-	-	-	-	NH
	Unigene20814	-	-	-	-	NH
	Unigene20843	-	-	-	-	NH
	Unigene20866	-	-	-	-	NH
	Unigene20987	-	-	-	-	NH
	Unigene21056	-	-	-	-	NH
	Unigene21126	-	-	-	-	NH
	Unigene21185	-	-	-	-	NH
	Unigene21229	-	-	-	-	NH
	Unigene21258	-	-	-	-	NH
	Unigene2126	-	-	-	-	NH
	Unigene21324	-	-	-	-	NH
	Unigene21352	-	-	-	-	NH
	Unigene21394	-	-	-	-	NH
	Unigene21440	-	-	-	-	NH
	Unigene21561	-	-	-	-	NH
	Unigene21647	-	-	-	-	NH
	Unigene21685	-	-	-	-	NH
	Unigene21763	-	-	-	-	NH
	Unigene21791	-	-	-	-	NH
	Unigene21850	-	-	-	-	NH
	Unigene21913	-	-	-	-	NH
	Unigene21925	-	-	-	-	NH
	Unigene22248	-	-	-	-	NH
	Unigene22458	-	-	-	-	NH
	Unigene22483	-	-	-	-	NH
	Unigene22624	-	-	-	-	NH
	Unigene22684	-	-	-	-	NH
	Unigene22699	-	-	-	-	NH
	Unigene22719	-	-	-	-	NH
	Unigene22726	-	-	-	-	NH
	Unigene2280	-	-	-	-	NH
	Unigene22911	-	-	-	-	NH
	Unigene22979	-	-	-	-	NH
	Unigene23022	-	-	-	-	NH
	Unigene23029	-	-	-	-	NH
	Unigene23080	-	-	-	-	NH
	Unigene23174	-	-	-	-	NH
	Unigene2320	-	-	-	-	NH
	Unigene23276	-	-	-	-	NH
	Unigene24037	-	-	-	-	NH
	Unigene24106	-	-	-	-	NH
	Unigene24129	-	-	-	-	NH
	Unigene2444	-	-	-	-	NH
	Unigene24485	-	-	-	-	NH
	Unigene2452	-	-	-	-	NH
	Unigene24554	-	-	-	-	NH
	Unigene24612	-	-	-	-	NH
	Unigene24660	-	-	-	-	NH
	Unigene24759	-	-	-	-	NH
	Unigene24775	-	-	-	-	NH
	Unigene25038	-	-	-	-	NH
	Unigene25096	-	-	-	-	NH
	Unigene25159	-	-	-	-	NH
	Unigene25241	-	-	-	-	NH
	Unigene25344	-	-	-	-	NH
	Unigene25545	-	-	-	-	NH
	Unigene2566	-	-	-	-	NH
	Unigene25700	-	-	-	-	NH
	Unigene25762	-	-	-	-	NH
	Unigene25810	-	-	-	-	NH
	Unigene25944	-	-	-	-	NH
	Unigene26127	-	-	-	-	NH
	Unigene26145	-	-	-	-	NH
	Unigene26188	-	-	-	-	NH
	Unigene26212	-	-	-	-	NH
	Unigene26306	-	-	-	-	NH
	Unigene26363	-	-	-	-	NH
	Unigene26480	-	-	-	-	NH
	Unigene26496	-	-	-	-	NH
	Unigene26554	-	-	-	-	NH
	Unigene26665	-	-	-	-	NH
	Unigene26722	-	-	-	-	NH
	Unigene26792	-	-	-	-	NH
	Unigene26802	-	-	-	-	NH
	Unigene26978	-	-	-	-	NH
	Unigene27115	-	-	-	-	NH
	Unigene27154	-	-	-	-	NH
	Unigene27314	-	-	-	-	NH
	Unigene27374	-	-	-	-	NH
	Unigene27456	-	-	-	-	NH
	Unigene27605	-	-	-	-	NH
	Unigene27695	-	-	-	-	NH
	Unigene27721	-	-	-	-	NH
	Unigene27804	-	-	-	-	NH
	Unigene27858	-	-	-	-	NH
	Unigene27948	-	-	-	-	NH
	Unigene27959	-	-	-	-	NH
	Unigene28129	-	-	-	-	NH
	Unigene28183	-	-	-	-	NH
	Unigene28222	-	-	-	-	NH
	Unigene28262	-	-	-	-	NH
	Unigene28437	-	-	-	-	NH
	Unigene28602	-	-	-	-	NH
	Unigene28635	-	-	-	-	NH
	Unigene2873	-	-	-	-	NH
	Unigene28733	-	-	-	-	NH
	Unigene28798	-	-	-	-	NH
	Unigene28980	-	-	-	-	NH
	Unigene29362	-	-	-	-	NH
	Unigene29401	-	-	-	-	NH
	Unigene29588	-	-	-	-	NH
	Unigene29653	-	-	-	-	NH
	Unigene29772	-	-	-	-	NH
	Unigene29804	-	-	-	-	NH
	Unigene29828	-	-	-	-	NH
	Unigene29871	-	-	-	-	NH
	Unigene29930	-	-	-	-	NH
	Unigene29971	-	-	-	-	NH
	Unigene30041	-	-	-	-	NH
	Unigene30066	-	-	-	-	NH
	Unigene30088	-	-	-	-	NH
	Unigene30116	-	-	-	-	NH
	Unigene30301	-	-	-	-	NH
	Unigene30354	-	-	-	-	NH
	Unigene30360	-	-	-	-	NH
	Unigene30458	-	-	-	-	NH
	Unigene30495	-	-	-	-	NH
	Unigene30651	-	-	-	-	NH
	Unigene30883	-	-	-	-	NH
	Unigene30931	-	-	-	-	NH
	Unigene30964	-	-	-	-	NH
	Unigene3115	-	-	-	-	NH
	Unigene31165	-	-	-	-	NH
	Unigene31321	-	-	-	-	NH
	Unigene31323	-	-	-	-	NH
	Unigene31354	-	-	-	-	NH
	Unigene31475	-	-	-	-	NH
	Unigene31488	-	-	-	-	NH
	Unigene31532	-	-	-	-	NH
	Unigene31583	-	-	-	-	NH
	Unigene31639	-	-	-	-	NH
	Unigene31699	-	-	-	-	NH
	Unigene31728	-	-	-	-	NH
	Unigene3175	-	-	-	-	NH
	Unigene31829	-	-	-	-	NH
	Unigene31830	-	-	-	-	NH
	Unigene31984	-	-	-	-	NH
	Unigene32211	-	-	-	-	NH
	Unigene32357	-	-	-	-	NH
	Unigene32379	-	-	-	-	NH
	Unigene32382	-	-	-	-	NH
	Unigene32424	-	-	-	-	NH
	Unigene32508	-	-	-	-	NH
	Unigene32557	-	-	-	-	NH
	Unigene32636	-	-	-	-	NH
	Unigene32664	-	-	-	-	NH
	Unigene3274	-	-	-	-	NH
	Unigene32813	-	-	-	-	NH
	Unigene32974	-	-	-	-	NH
	Unigene33003	-	-	-	-	NH
	Unigene33042	-	-	-	-	NH
	Unigene332	-	-	-	-	NH
	Unigene3320	-	-	-	-	NH
	Unigene33251	-	-	-	-	NH
	Unigene33508	-	-	-	-	NH
	Unigene33673	-	-	-	-	NH
	Unigene33919	-	-	-	-	NH
	Unigene33926	-	-	-	-	NH
	Unigene34127	-	-	-	-	NH
	Unigene34133	-	-	-	-	NH
	Unigene34135	-	-	-	-	NH
	Unigene34150	-	-	-	-	NH
	Unigene34209	-	-	-	-	NH
	Unigene34391	-	-	-	-	NH
	Unigene34524	-	-	-	-	NH
	Unigene34642	-	-	-	-	NH
	Unigene3484	-	-	-	-	NH
	Unigene34876	-	-	-	-	NH
	Unigene34882	-	-	-	-	NH
	Unigene34955	-	-	-	-	NH
	Unigene3498	-	-	-	-	NH
	Unigene3508	-	-	-	-	NH
	Unigene35165	-	-	-	-	NH
	Unigene35260	-	-	-	-	NH
	Unigene35473	-	-	-	-	NH
	Unigene35482	-	-	-	-	NH
	Unigene35569	-	-	-	-	NH
	Unigene35581	-	-	-	-	NH
	Unigene35624	-	-	-	-	NH
	Unigene35914	-	-	-	-	NH
	Unigene35938	-	-	-	-	NH
	Unigene35994	-	-	-	-	NH
	Unigene36183	-	-	-	-	NH
	Unigene3633	-	-	-	-	NH
	Unigene36387	-	-	-	-	NH
	Unigene36440	-	-	-	-	NH
	Unigene36446	-	-	-	-	NH
	Unigene36475	-	-	-	-	NH
	Unigene36479	-	-	-	-	NH
	Unigene36482	-	-	-	-	NH
	Unigene36511	-	-	-	-	NH
	Unigene36525	-	-	-	-	NH
	Unigene36673	-	-	-	-	NH
	Unigene36692	-	-	-	-	NH
	Unigene36838	-	-	-	-	NH
	Unigene36843	-	-	-	-	NH
	Unigene3688	-	-	-	-	NH
	Unigene36889	-	-	-	-	NH
	Unigene36909	-	-	-	-	NH
	Unigene36942	-	-	-	-	NH
	Unigene3695	-	-	-	-	NH
	Unigene37007	-	-	-	-	NH
	Unigene37090	-	-	-	-	NH
	Unigene37284	-	-	-	-	NH
	Unigene37343	-	-	-	-	NH
	Unigene37533	-	-	-	-	NH
	Unigene37634	-	-	-	-	NH
	Unigene37642	-	-	-	-	NH
	Unigene37680	-	-	-	-	NH
	Unigene37786	-	-	-	-	NH
	Unigene38130	-	-	-	-	NH
	Unigene38348	-	-	-	-	NH
	Unigene38443	-	-	-	-	NH
	Unigene38445	-	-	-	-	NH
	Unigene38532	-	-	-	-	NH
	Unigene38857	-	-	-	-	NH
	Unigene38929	-	-	-	-	NH
	Unigene38978	-	-	-	-	NH
	Unigene38998	-	-	-	-	NH
	Unigene39077	-	-	-	-	NH
	Unigene3915	-	-	-	-	NH
	Unigene39174	-	-	-	-	NH
	Unigene39241	-	-	-	-	NH
	Unigene3946	-	-	-	-	NH
	Unigene40198	-	-	-	-	NH
	Unigene40534	-	-	-	-	NH
	Unigene40870	-	-	-	-	NH
	Unigene41179	-	-	-	-	NH
	Unigene41318	-	-	-	-	NH
	Unigene41342	-	-	-	-	NH
	Unigene41369	-	-	-	-	NH
	Unigene41387	-	-	-	-	NH
	Unigene41699	-	-	-	-	NH
	Unigene41792	-	-	-	-	NH
	Unigene41841	-	-	-	-	NH
	Unigene4229	-	-	-	-	NH
	Unigene4230	-	-	-	-	NH
	Unigene4231	-	-	-	-	NH
	Unigene42354	-	-	-	-	NH
	Unigene42460	-	-	-	-	NH
	Unigene42673	-	-	-	-	NH
	Unigene42832	-	-	-	-	NH
	Unigene4295	-	-	-	-	NH
	Unigene43215	-	-	-	-	NH
	Unigene43579	-	-	-	-	NH
	Unigene43836	-	-	-	-	NH
	Unigene43889	-	-	-	-	NH
	Unigene43997	-	-	-	-	NH
	Unigene4410	-	-	-	-	NH
	Unigene44320	-	-	-	-	NH
	Unigene44543	-	-	-	-	NH
	Unigene44792	-	-	-	-	NH
	Unigene44855	-	-	-	-	NH
	Unigene44969	-	-	-	-	NH
	Unigene45090	-	-	-	-	NH
	Unigene45150	-	-	-	-	NH
	Unigene45152	-	-	-	-	NH
	Unigene45159	-	-	-	-	NH
	Unigene45167	-	-	-	-	NH
	Unigene45208	-	-	-	-	NH
	Unigene45747	-	-	-	-	NH
	Unigene45877	-	-	-	-	NH
	Unigene45963	-	-	-	-	NH
	Unigene46005	-	-	-	-	NH
	Unigene46072	-	-	-	-	NH
	Unigene46096	-	-	-	-	NH
	Unigene46183	-	-	-	-	NH
	Unigene46216	-	-	-	-	NH
	Unigene46442	-	-	-	-	NH
	Unigene46463	-	-	-	-	NH
	Unigene46684	-	-	-	-	NH
	Unigene46891	-	-	-	-	NH
	Unigene46905	-	-	-	-	NH
	Unigene47054	-	-	-	-	NH
	Unigene47310	-	-	-	-	NH
	Unigene4762	-	-	-	-	NH
	Unigene47742	-	-	-	-	NH
	Unigene47858	-	-	-	-	NH
	Unigene48018	-	-	-	-	NH
	Unigene48720	-	-	-	-	NH
	Unigene48791	-	-	-	-	NH
	Unigene48977	-	-	-	-	NH
	Unigene49092	-	-	-	-	NH
	Unigene49198	-	-	-	-	NH
	Unigene4937	-	-	-	-	NH
	Unigene49533	-	-	-	-	NH
	Unigene49851	-	-	-	-	NH
	Unigene49912	-	-	-	-	NH
	Unigene50205	-	-	-	-	NH
	Unigene50241	-	-	-	-	NH
	Unigene50473	-	-	-	-	NH
	Unigene50859	-	-	-	-	NH
	Unigene51181	-	-	-	-	NH
	Unigene51313	-	-	-	-	NH
	Unigene51393	-	-	-	-	NH
	Unigene5163	-	-	-	-	NH
	Unigene5164	-	-	-	-	NH
	Unigene52048	-	-	-	-	NH
	Unigene52255	-	-	-	-	NH
	Unigene52355	-	-	-	-	NH
	Unigene52528	-	-	-	-	NH
	Unigene52575	-	-	-	-	NH
	Unigene53129	-	-	-	-	NH
	Unigene5321	-	-	-	-	NH
	Unigene53461	-	-	-	-	NH
	Unigene5358	-	-	-	-	NH
	Unigene53858	-	-	-	-	NH
	Unigene54376	-	-	-	-	NH
	Unigene54688	-	-	-	-	NH
	Unigene5504	-	-	-	-	NH
	Unigene55105	-	-	-	-	NH
	Unigene55298	-	-	-	-	NH
	Unigene55535	-	-	-	-	NH
	Unigene55986	-	-	-	-	NH
	Unigene56188	-	-	-	-	NH
	Unigene56796	-	-	-	-	NH
	Unigene5748	-	-	-	-	NH
	Unigene5785	-	-	-	-	NH
	Unigene58036	-	-	-	-	NH
	Unigene58068	-	-	-	-	NH
	Unigene5818	-	-	-	-	NH
	Unigene59287	-	-	-	-	NH
	Unigene59804	-	-	-	-	NH
	Unigene59983	-	-	-	-	NH
	Unigene60782	-	-	-	-	NH
	Unigene60899	-	-	-	-	NH
	Unigene6167	-	-	-	-	NH
	Unigene6218	-	-	-	-	NH
	Unigene62507	-	-	-	-	NH
	Unigene62568	-	-	-	-	NH
	Unigene62864	-	-	-	-	NH
	Unigene6288	-	-	-	-	NH
	Unigene63228	-	-	-	-	NH
	Unigene63995	-	-	-	-	NH
	Unigene64546	-	-	-	-	NH
	Unigene6455	-	-	-	-	NH
	Unigene64632	-	-	-	-	NH
	Unigene64852	-	-	-	-	NH
	Unigene6536	-	-	-	-	NH
	Unigene6659	-	-	-	-	NH
	Unigene6841	-	-	-	-	NH
	Unigene68683	-	-	-	-	NH
	Unigene689	-	-	-	-	NH
	Unigene6901	-	-	-	-	NH
	Unigene6924	-	-	-	-	NH
	Unigene69652	-	-	-	-	NH
	Unigene7471	-	-	-	-	NH
	Unigene7526	-	-	-	-	NH
	Unigene7979	-	-	-	-	NH
	Unigene8148	-	-	-	-	NH
	Unigene8171	-	-	-	-	NH
	Unigene8292	-	-	-	-	NH
	Unigene853	-	-	-	-	NH
	Unigene8567	-	-	-	-	NH
	Unigene9016	-	-	-	-	NH
	Unigene9278	-	-	-	-	NH
	Unigene9410	-	-	-	-	NH
	Unigene9536	-	-	-	-	NH
	Unigene996	-	-	-	-	NH
	Unigene9968	-	-	-	-	NH
Lateral petals	Unigene12788	AT3G60030	86.3	4e-10	65.9	EE
	Unigene28821	AT5G43760	91.67	5e-10	63.9	EE
	Unigene48025	AT2G26640	92.86	1e-08	60	EE
	Unigene62958	AT1G35515	83.19	2e-12	73.8	EE
	Unigene70188	AT3G04290	81	9e-19	95.6	EE
	Unigene8660	AT5G13930	91.43	3e-06	46.1	EE
	Unigene10664	AT3G08910	84.47	4e-27	121	DE
	Unigene11457	AT1G60690	83.33	9e-09	60	DE
	Unigene13248	AT5G48060	88	3e-06	52	DE
	Unigene19915	AT1G01050	96.55	6e-06	50.1	DE
	Unigene22496	AT1G28620	96.67	2e-06	52	DE
	Unigene22660	AT5G63530	96.55	6e-06	50.1	DE
	Unigene28869	AT1G61490	88.14	2e-09	61.9	DE
	Unigene28910	AT4G29240	96.55	7e-06	50.1	DE
	Unigene30757	AT5G63530	83.75	1e-07	56	DE
	Unigene44878	AT5G60800	92.11	3e-06	52	DE
	Unigene51327	AT1G52880	89.36	9e-07	54	DE
	Unigene52258	AT3G13890	89.36	9e-07	54	DE
	Unigene55413	AT3G15510	79.59	2e-17	89.7	DE
	Unigene57696	AT4G28480	81.12	3e-19	95.6	DE
	Unigene10741	AT3G43600	92.45	3e-12	73.8	UE
	Unigene14153	AT2G07682	98.04	3e-18	93.7	UE
	Unigene20761	AT2G36750	90.91	1e-07	56	UE
	Unigene23553	AT5G62160	90.7	4e-07	54	UE
	Unigene27697	AT4G12330	95.24	3e-11	67.9	UE
	Unigene30723	AT1G26130	85.94	1e-07	56	UE
	Unigene58304	AT3G12750	83.72	2e-08	60	UE
	Unigene10086	-	-	-	-	NH
	Unigene10171	-	-	-	-	NH
	Unigene10219	-	-	-	-	NH
	Unigene1057	-	-	-	-	NH
	Unigene10721	-	-	-	-	NH
	Unigene10782	-	-	-	-	NH
	Unigene10803	-	-	-	-	NH
	Unigene10990	-	-	-	-	NH
	Unigene11211	-	-	-	-	NH
	Unigene1128	-	-	-	-	NH
	Unigene11301	-	-	-	-	NH
	Unigene11416	-	-	-	-	NH
	Unigene1175	-	-	-	-	NH
	Unigene11926	-	-	-	-	NH
	Unigene11933	-	-	-	-	NH
	Unigene12417	-	-	-	-	NH
	Unigene12485	-	-	-	-	NH
	Unigene1272	-	-	-	-	NH
	Unigene13600	-	-	-	-	NH
	Unigene14662	-	-	-	-	NH
	Unigene15685	-	-	-	-	NH
	Unigene15950	-	-	-	-	NH
	Unigene16191	-	-	-	-	NH
	Unigene1629	-	-	-	-	NH
	Unigene16520	-	-	-	-	NH
	Unigene1657	-	-	-	-	NH
	Unigene1684	-	-	-	-	NH
	Unigene1695	-	-	-	-	NH
	Unigene1793	-	-	-	-	NH
	Unigene1806	-	-	-	-	NH
	Unigene18418	-	-	-	-	NH
	Unigene18476	-	-	-	-	NH
	Unigene18491	-	-	-	-	NH
	Unigene18536	-	-	-	-	NH
	Unigene18622	-	-	-	-	NH
	Unigene18680	-	-	-	-	NH
	Unigene18687	-	-	-	-	NH
	Unigene18718	-	-	-	-	NH
	Unigene18846	-	-	-	-	NH
	Unigene18878	-	-	-	-	NH
	Unigene18887	-	-	-	-	NH
	Unigene18894	-	-	-	-	NH
	Unigene18900	-	-	-	-	NH
	Unigene18927	-	-	-	-	NH
	Unigene19033	-	-	-	-	NH
	Unigene19078	-	-	-	-	NH
	Unigene19133	-	-	-	-	NH
	Unigene19160	-	-	-	-	NH
	Unigene19211	-	-	-	-	NH
	Unigene19233	-	-	-	-	NH
	Unigene19262	-	-	-	-	NH
	Unigene19314	-	-	-	-	NH
	Unigene19356	-	-	-	-	NH
	Unigene19411	-	-	-	-	NH
	Unigene19513	-	-	-	-	NH
	Unigene19585	-	-	-	-	NH
	Unigene19635	-	-	-	-	NH
	Unigene19704	-	-	-	-	NH
	Unigene19715	-	-	-	-	NH
	Unigene19827	-	-	-	-	NH
	Unigene19838	-	-	-	-	NH
	Unigene19871	-	-	-	-	NH
	Unigene20043	-	-	-	-	NH
	Unigene20048	-	-	-	-	NH
	Unigene20116	-	-	-	-	NH
	Unigene20211	-	-	-	-	NH
	Unigene20290	-	-	-	-	NH
	Unigene20318	-	-	-	-	NH
	Unigene2033	-	-	-	-	NH
	Unigene20350	-	-	-	-	NH
	Unigene20463	-	-	-	-	NH
	Unigene20558	-	-	-	-	NH
	Unigene20778	-	-	-	-	NH
	Unigene20839	-	-	-	-	NH
	Unigene20842	-	-	-	-	NH
	Unigene20911	-	-	-	-	NH
	Unigene2100	-	-	-	-	NH
	Unigene21053	-	-	-	-	NH
	Unigene21087	-	-	-	-	NH
	Unigene21176	-	-	-	-	NH
	Unigene21178	-	-	-	-	NH
	Unigene21342	-	-	-	-	NH
	Unigene21442	-	-	-	-	NH
	Unigene21486	-	-	-	-	NH
	Unigene21596	-	-	-	-	NH
	Unigene2177	-	-	-	-	NH
	Unigene22068	-	-	-	-	NH
	Unigene22186	-	-	-	-	NH
	Unigene22194	-	-	-	-	NH
	Unigene22418	-	-	-	-	NH
	Unigene22474	-	-	-	-	NH
	Unigene2250	-	-	-	-	NH
	Unigene22522	-	-	-	-	NH
	Unigene22524	-	-	-	-	NH
	Unigene22554	-	-	-	-	NH
	Unigene22570	-	-	-	-	NH
	Unigene22576	-	-	-	-	NH
	Unigene2260	-	-	-	-	NH
	Unigene22736	-	-	-	-	NH
	Unigene22758	-	-	-	-	NH
	Unigene22892	-	-	-	-	NH
	Unigene2304	-	-	-	-	NH
	Unigene23089	-	-	-	-	NH
	Unigene23183	-	-	-	-	NH
	Unigene23261	-	-	-	-	NH
	Unigene23340	-	-	-	-	NH
	Unigene23643	-	-	-	-	NH
	Unigene23791	-	-	-	-	NH
	Unigene23875	-	-	-	-	NH
	Unigene23908	-	-	-	-	NH
	Unigene2399	-	-	-	-	NH
	Unigene24118	-	-	-	-	NH
	Unigene24173	-	-	-	-	NH
	Unigene24216	-	-	-	-	NH
	Unigene24254	-	-	-	-	NH
	Unigene24494	-	-	-	-	NH
	Unigene24567	-	-	-	-	NH
	Unigene24636	-	-	-	-	NH
	Unigene24642	-	-	-	-	NH
	Unigene25154	-	-	-	-	NH
	Unigene25191	-	-	-	-	NH
	Unigene25236	-	-	-	-	NH
	Unigene25448	-	-	-	-	NH
	Unigene25773	-	-	-	-	NH
	Unigene25924	-	-	-	-	NH
	Unigene25959	-	-	-	-	NH
	Unigene26016	-	-	-	-	NH
	Unigene26199	-	-	-	-	NH
	Unigene26340	-	-	-	-	NH
	Unigene26350	-	-	-	-	NH
	Unigene26414	-	-	-	-	NH
	Unigene26613	-	-	-	-	NH
	Unigene2684	-	-	-	-	NH
	Unigene26947	-	-	-	-	NH
	Unigene2703	-	-	-	-	NH
	Unigene27202	-	-	-	-	NH
	Unigene27239	-	-	-	-	NH
	Unigene27274	-	-	-	-	NH
	Unigene27357	-	-	-	-	NH
	Unigene27530	-	-	-	-	NH
	Unigene27689	-	-	-	-	NH
	Unigene28102	-	-	-	-	NH
	Unigene28235	-	-	-	-	NH
	Unigene28397	-	-	-	-	NH
	Unigene28453	-	-	-	-	NH
	Unigene28544	-	-	-	-	NH
	Unigene28790	-	-	-	-	NH
	Unigene28887	-	-	-	-	NH
	Unigene28989	-	-	-	-	NH
	Unigene29067	-	-	-	-	NH
	Unigene29079	-	-	-	-	NH
	Unigene2918	-	-	-	-	NH
	Unigene29207	-	-	-	-	NH
	Unigene29383	-	-	-	-	NH
	Unigene29523	-	-	-	-	NH
	Unigene29600	-	-	-	-	NH
	Unigene29743	-	-	-	-	NH
	Unigene29784	-	-	-	-	NH
	Unigene29796	-	-	-	-	NH
	Unigene29802	-	-	-	-	NH
	Unigene29842	-	-	-	-	NH
	Unigene29897	-	-	-	-	NH
	Unigene29927	-	-	-	-	NH
	Unigene30146	-	-	-	-	NH
	Unigene30155	-	-	-	-	NH
	Unigene30302	-	-	-	-	NH
	Unigene30351	-	-	-	-	NH
	Unigene30437	-	-	-	-	NH
	Unigene30447	-	-	-	-	NH
	Unigene30567	-	-	-	-	NH
	Unigene30615	-	-	-	-	NH
	Unigene30717	-	-	-	-	NH
	Unigene30742	-	-	-	-	NH
	Unigene30744	-	-	-	-	NH
	Unigene30756	-	-	-	-	NH
	Unigene30775	-	-	-	-	NH
	Unigene30845	-	-	-	-	NH
	Unigene30994	-	-	-	-	NH
	Unigene31053	-	-	-	-	NH
	Unigene31055	-	-	-	-	NH
	Unigene31057	-	-	-	-	NH
	Unigene31064	-	-	-	-	NH
	Unigene31195	-	-	-	-	NH
	Unigene31217	-	-	-	-	NH
	Unigene31465	-	-	-	-	NH
	Unigene31576	-	-	-	-	NH
	Unigene31627	-	-	-	-	NH
	Unigene3167	-	-	-	-	NH
	Unigene31732	-	-	-	-	NH
	Unigene31772	-	-	-	-	NH
	Unigene31840	-	-	-	-	NH
	Unigene31893	-	-	-	-	NH
	Unigene31904	-	-	-	-	NH
	Unigene32035	-	-	-	-	NH
	Unigene32134	-	-	-	-	NH
	Unigene3221	-	-	-	-	NH
	Unigene3236	-	-	-	-	NH
	Unigene32366	-	-	-	-	NH
	Unigene32368	-	-	-	-	NH
	Unigene32413	-	-	-	-	NH
	Unigene32449	-	-	-	-	NH
	Unigene32484	-	-	-	-	NH
	Unigene32536	-	-	-	-	NH
	Unigene32554	-	-	-	-	NH
	Unigene32689	-	-	-	-	NH
	Unigene32735	-	-	-	-	NH
	Unigene32784	-	-	-	-	NH
	Unigene32811	-	-	-	-	NH
	Unigene32879	-	-	-	-	NH
	Unigene33026	-	-	-	-	NH
	Unigene33039	-	-	-	-	NH
	Unigene33107	-	-	-	-	NH
	Unigene33122	-	-	-	-	NH
	Unigene33144	-	-	-	-	NH
	Unigene33156	-	-	-	-	NH
	Unigene33213	-	-	-	-	NH
	Unigene33214	-	-	-	-	NH
	Unigene33318	-	-	-	-	NH
	Unigene33321	-	-	-	-	NH
	Unigene3346	-	-	-	-	NH
	Unigene33463	-	-	-	-	NH
	Unigene3363	-	-	-	-	NH
	Unigene33665	-	-	-	-	NH
	Unigene34074	-	-	-	-	NH
	Unigene3417	-	-	-	-	NH
	Unigene34266	-	-	-	-	NH
	Unigene34341	-	-	-	-	NH
	Unigene34357	-	-	-	-	NH
	Unigene34366	-	-	-	-	NH
	Unigene34421	-	-	-	-	NH
	Unigene34512	-	-	-	-	NH
	Unigene34567	-	-	-	-	NH
	Unigene34730	-	-	-	-	NH
	Unigene34859	-	-	-	-	NH
	Unigene3501	-	-	-	-	NH
	Unigene35081	-	-	-	-	NH
	Unigene35110	-	-	-	-	NH
	Unigene35140	-	-	-	-	NH
	Unigene35175	-	-	-	-	NH
	Unigene35212	-	-	-	-	NH
	Unigene35224	-	-	-	-	NH
	Unigene35273	-	-	-	-	NH
	Unigene35276	-	-	-	-	NH
	Unigene35369	-	-	-	-	NH
	Unigene35398	-	-	-	-	NH
	Unigene35514	-	-	-	-	NH
	Unigene35600	-	-	-	-	NH
	Unigene35710	-	-	-	-	NH
	Unigene35802	-	-	-	-	NH
	Unigene36073	-	-	-	-	NH
	Unigene36186	-	-	-	-	NH
	Unigene36199	-	-	-	-	NH
	Unigene36207	-	-	-	-	NH
	Unigene36212	-	-	-	-	NH
	Unigene36410	-	-	-	-	NH
	Unigene36435	-	-	-	-	NH
	Unigene36462	-	-	-	-	NH
	Unigene36548	-	-	-	-	NH
	Unigene36688	-	-	-	-	NH
	Unigene3675	-	-	-	-	NH
	Unigene3700	-	-	-	-	NH
	Unigene37143	-	-	-	-	NH
	Unigene37237	-	-	-	-	NH
	Unigene37514	-	-	-	-	NH
	Unigene37691	-	-	-	-	NH
	Unigene37800	-	-	-	-	NH
	Unigene37847	-	-	-	-	NH
	Unigene37955	-	-	-	-	NH
	Unigene38107	-	-	-	-	NH
	Unigene38168	-	-	-	-	NH
	Unigene38730	-	-	-	-	NH
	Unigene38789	-	-	-	-	NH
	Unigene38843	-	-	-	-	NH
	Unigene38907	-	-	-	-	NH
	Unigene38953	-	-	-	-	NH
	Unigene39018	-	-	-	-	NH
	Unigene39281	-	-	-	-	NH
	Unigene39291	-	-	-	-	NH
	Unigene39430	-	-	-	-	NH
	Unigene39440	-	-	-	-	NH
	Unigene39742	-	-	-	-	NH
	Unigene40267	-	-	-	-	NH
	Unigene40369	-	-	-	-	NH
	Unigene40416	-	-	-	-	NH
	Unigene40454	-	-	-	-	NH
	Unigene40809	-	-	-	-	NH
	Unigene40888	-	-	-	-	NH
	Unigene41068	-	-	-	-	NH
	Unigene41172	-	-	-	-	NH
	Unigene41256	-	-	-	-	NH
	Unigene41282	-	-	-	-	NH
	Unigene41595	-	-	-	-	NH
	Unigene41626	-	-	-	-	NH
	Unigene41636	-	-	-	-	NH
	Unigene41718	-	-	-	-	NH
	Unigene42078	-	-	-	-	NH
	Unigene4210	-	-	-	-	NH
	Unigene42640	-	-	-	-	NH
	Unigene42675	-	-	-	-	NH
	Unigene42726	-	-	-	-	NH
	Unigene42836	-	-	-	-	NH
	Unigene42874	-	-	-	-	NH
	Unigene42939	-	-	-	-	NH
	Unigene43039	-	-	-	-	NH
	Unigene43285	-	-	-	-	NH
	Unigene43312	-	-	-	-	NH
	Unigene43361	-	-	-	-	NH
	Unigene43763	-	-	-	-	NH
	Unigene43785	-	-	-	-	NH
	Unigene44145	-	-	-	-	NH
	Unigene44151	-	-	-	-	NH
	Unigene44184	-	-	-	-	NH
	Unigene44371	-	-	-	-	NH
	Unigene44382	-	-	-	-	NH
	Unigene44431	-	-	-	-	NH
	Unigene44445	-	-	-	-	NH
	Unigene4446	-	-	-	-	NH
	Unigene44656	-	-	-	-	NH
	Unigene44808	-	-	-	-	NH
	Unigene44844	-	-	-	-	NH
	Unigene44946	-	-	-	-	NH
	Unigene4544	-	-	-	-	NH
	Unigene45547	-	-	-	-	NH
	Unigene45769	-	-	-	-	NH
	Unigene45784	-	-	-	-	NH
	Unigene4594	-	-	-	-	NH
	Unigene45964	-	-	-	-	NH
	Unigene4612	-	-	-	-	NH
	Unigene46343	-	-	-	-	NH
	Unigene46558	-	-	-	-	NH
	Unigene4706	-	-	-	-	NH
	Unigene4726	-	-	-	-	NH
	Unigene47357	-	-	-	-	NH
	Unigene47400	-	-	-	-	NH
	Unigene47453	-	-	-	-	NH
	Unigene47546	-	-	-	-	NH
	Unigene47575	-	-	-	-	NH
	Unigene47815	-	-	-	-	NH
	Unigene47823	-	-	-	-	NH
	Unigene48227	-	-	-	-	NH
	Unigene48235	-	-	-	-	NH
	Unigene48367	-	-	-	-	NH
	Unigene48535	-	-	-	-	NH
	Unigene48918	-	-	-	-	NH
	Unigene49041	-	-	-	-	NH
	Unigene49423	-	-	-	-	NH
	Unigene49535	-	-	-	-	NH
	Unigene50312	-	-	-	-	NH
	Unigene50429	-	-	-	-	NH
	Unigene50567	-	-	-	-	NH
	Unigene50590	-	-	-	-	NH
	Unigene50600	-	-	-	-	NH
	Unigene5132	-	-	-	-	NH
	Unigene51379	-	-	-	-	NH
	Unigene51515	-	-	-	-	NH
	Unigene5175	-	-	-	-	NH
	Unigene52356	-	-	-	-	NH
	Unigene52509	-	-	-	-	NH
	Unigene52868	-	-	-	-	NH
	Unigene5296	-	-	-	-	NH
	Unigene53286	-	-	-	-	NH
	Unigene5346	-	-	-	-	NH
	Unigene53567	-	-	-	-	NH
	Unigene5361	-	-	-	-	NH
	Unigene5589	-	-	-	-	NH
	Unigene56108	-	-	-	-	NH
	Unigene56517	-	-	-	-	NH
	Unigene56653	-	-	-	-	NH
	Unigene56820	-	-	-	-	NH
	Unigene57027	-	-	-	-	NH
	Unigene58200	-	-	-	-	NH
	Unigene58238	-	-	-	-	NH
	Unigene58366	-	-	-	-	NH
	Unigene58549	-	-	-	-	NH
	Unigene58781	-	-	-	-	NH
	Unigene59463	-	-	-	-	NH
	Unigene60113	-	-	-	-	NH
	Unigene60318	-	-	-	-	NH
	Unigene6043	-	-	-	-	NH
	Unigene6247	-	-	-	-	NH
	Unigene6350	-	-	-	-	NH
	Unigene63521	-	-	-	-	NH
	Unigene63981	-	-	-	-	NH
	Unigene6531	-	-	-	-	NH
	Unigene67121	-	-	-	-	NH
	Unigene673	-	-	-	-	NH
	Unigene67608	-	-	-	-	NH
	Unigene6764	-	-	-	-	NH
	Unigene70943	-	-	-	-	NH
	Unigene7101	-	-	-	-	NH
	Unigene71433	-	-	-	-	NH
	Unigene7221	-	-	-	-	NH
	Unigene729	-	-	-	-	NH
	Unigene7457	-	-	-	-	NH
	Unigene7476	-	-	-	-	NH
	Unigene7850	-	-	-	-	NH
	Unigene8259	-	-	-	-	NH
	Unigene837	-	-	-	-	NH
	Unigene8371	-	-	-	-	NH
	Unigene8553	-	-	-	-	NH
	Unigene8565	-	-	-	-	NH
	Unigene8661	-	-	-	-	NH
	Unigene8722	-	-	-	-	NH
	Unigene8914	-	-	-	-	NH
	Unigene894	-	-	-	-	NH
	Unigene9178	-	-	-	-	NH
	Unigene936	-	-	-	-	NH
	Unigene9528	-	-	-	-	NH
Ventral petals	Unigene18171	AT4G02810	88.31	2e-14	81.8	EE
	Unigene21919	AT5G25320	85.92	2e-09	61.9	EE
	Unigene37222	AT1G20696	100	9e-06	50.1	EE
	Unigene49372	AT5G59840	92.16	1e-11	69.9	EE
	Unigene51665	AT4G20890	82.86	6e-17	87.7	EE
	Unigene58634	AT2G16920	90.38	1e-09	63.9	EE
	Unigene62919	AT1G69690	100	4e-07	56	EE
	Unigene63757	AT2G45650	89.36	2e-06	54	EE
	Unigene6931	AT2G21420	87.5	5e-12	71.9	EE
	Unigene11318	AT2G42740	97.92	1e-16	87.7	DE
	Unigene11852	AT3G09440	83.23	2e-20	101	DE
	Unigene12216	AT1G56410	84.96	6e-22	105	DE
	Unigene12865	AT4G24280	89.29	8e-10	63.9	DE
	Unigene13202	AT5G13490	97.14	9e-09	61.9	DE
	Unigene14339	AT3G62030	88.89	6e-06	50.1	DE
	Unigene17375	AT3G09630	85.23	1e-11	71.9	DE
	Unigene17565	AT3G18780	81.01	5e-50	198	DE
	Unigene17594	AT2G27530	90.74	1e-10	67.9	DE
	Unigene17734	AT5G60390	79.94	2e-30	135	DE
	Unigene18158	AT3G13920	85.71	6e-08	60	DE
	Unigene1894	AT5G08670	90.91	1e-07	56	DE
	Unigene24912	AT4G05320	82.88	2e-18	91.7	DE
	Unigene25587	AT3G23730	88.68	3e-08	58	DE
	Unigene28657	AT5G56360	94.12	2e-06	52	DE
	Unigene30441	AT3G53750	82.99	6e-28	123	DE
	Unigene30487	AT5G12110	96.88	1e-07	56	DE
	Unigene32380	AT4G31180	100	5e-07	54	DE
	Unigene32726	AT1G66580	91.49	2e-09	61.9	DE
	Unigene35479	AT5G55760	81.71	4e-17	87.7	DE
	Unigene36270	AT2G47110	91.07	2e-12	71.9	DE
	Unigene3795	AT5G56010	80.33	2e-13	77.8	DE
	Unigene38592	AT1G76270	90.54	3e-18	91.7	DE
	Unigene39040	AT5G08670	80.77	7e-16	83.8	DE
	Unigene39607	AT5G10980	85.96	1e-05	50.1	DE
	Unigene40670	AT2G42270	87.1	1e-08	60	DE
	Unigene4168	AT3G04120	85.71	2e-10	65.9	DE
	Unigene42807	AT2G44120	86.36	1e-08	60	DE
	Unigene43198	AT4G30800	90.48	3e-06	52	DE
	Unigene44538	AT1G14320	94.87	3e-09	61.9	DE
	Unigene45764	AT1G64740	84.21	1e-11	69.9	DE
	Unigene46279	AT1G51500	88.46	2e-07	56	DE
	Unigene47998	AT4G39780	90.48	5e-14	77.8	DE
	Unigene48641	AT2G36530	84.78	3e-12	71.9	DE
	Unigene5433	AT5G10500	88	2e-06	52	DE
	Unigene54658	AT1G75388	89.23	1e-12	73.8	DE
	Unigene54955	AT4G36230	91.11	6e-08	58	DE
	Unigene5510	AT5G55190	86.21	8e-14	77.8	DE
	Unigene56610	AT1G61580	92.11	4e-06	52	DE
	Unigene5690	AT1G43170	83.19	9e-13	73.8	DE
	Unigene57132	AT1G23290	89.36	1e-06	54	DE
	Unigene57746	AT5G02960	84.4	5e-15	81.8	DE
	Unigene58867	AT2G20370	82.61	9e-20	97.6	DE
	Unigene59456	AT4G37910	87.3	5e-09	61.9	DE
	Unigene59844	AT1G68560	84.81	5e-09	61.9	DE
	Unigene62176	AT4G00750	81.29	1e-13	77.8	DE
	Unigene62554	AT3G02520	93.33	4e-10	65.9	DE
	Unigene64617	AT2G29550	84.81	7e-09	61.9	DE
	Unigene64793	AT3G21090	84.78	7e-12	71.9	DE
	Unigene65397	AT5G13400	84.26	3e-14	79.8	DE
	Unigene66361	AT4G36130	92.31	1e-22	107	DE
	Unigene6660	AT3G55280	94.34	5e-15	81.8	DE
	Unigene69442	AT3G46520	82.86	1e-42	174	DE
	Unigene69494	AT1G56070	89.23	3e-12	73.8	DE
	Unigene70259	AT1G29660	86.11	9e-19	95.6	DE
	Unigene8022	AT3G12110	90	1e-08	60	DE
	Unigene8337	AT5G18980	89.29	6e-09	63.9	DE
	Unigene8378	AT1G51500	80.75	5e-11	69.9	DE
	Unigene8592	AT5G09810	86.08	6e-07	54	DE
	Unigene9982	ATMG01190	82.42	3e-06	54	DE
	Unigene14075	AT5G60970	96.97	9e-08	58	UE
	Unigene14413	AT2G01770	90.54	8e-18	91.7	UE
	Unigene41485	AT2G13680	84.88	4e-11	67.9	UE
	Unigene41774	AT4G33990	87.69	2e-10	65.9	UE
	Unigene43659	AT2G07733	93.71	2e-65	248	UE
	Unigene44677	AT5G27000	85.33	3e-09	61.9	UE
	Unigene48347	AT2G13680	84.93	5e-08	58	UE
	Unigene48352	AT3G12915	94.74	1e-08	60	UE
	Unigene59447	AT3G13784	90.48	5e-06	52	UE
	Unigene60071	AT1G68640	82.76	5e-12	71.9	UE
	Unigene60518	AT2G20880	81.13	5e-06	52	UE
	Unigene61479	AT5G27000	91.67	1e-09	63.9	UE
	Unigene63487	AT1G66370	85.07	2e-06	54	UE
	Unigene70249	AT2G37700	94.44	8e-07	56	UE
	Unigene823	AT2G34530	100	8e-06	50.1	UE
	Unigene8498	AT2G13680	81.21	2e-34	147	UE
	Unigene874	AT5G18860	92.11	2e-06	52	UE
	Unigene10005	-	-	-	-	NH
	Unigene10394	-	-	-	-	NH
	Unigene10408	-	-	-	-	NH
	Unigene10458	-	-	-	-	NH
	Unigene1064	-	-	-	-	NH
	Unigene10764	-	-	-	-	NH
	Unigene10766	-	-	-	-	NH
	Unigene10874	-	-	-	-	NH
	Unigene10875	-	-	-	-	NH
	Unigene10890	-	-	-	-	NH
	Unigene10906	-	-	-	-	NH
	Unigene1092	-	-	-	-	NH
	Unigene11003	-	-	-	-	NH
	Unigene1111	-	-	-	-	NH
	Unigene11175	-	-	-	-	NH
	Unigene11329	-	-	-	-	NH
	Unigene1136	-	-	-	-	NH
	Unigene11463	-	-	-	-	NH
	Unigene11476	-	-	-	-	NH
	Unigene11667	-	-	-	-	NH
	Unigene1169	-	-	-	-	NH
	Unigene1185	-	-	-	-	NH
	Unigene12032	-	-	-	-	NH
	Unigene12055	-	-	-	-	NH
	Unigene1209	-	-	-	-	NH
	Unigene12292	-	-	-	-	NH
	Unigene12371	-	-	-	-	NH
	Unigene12466	-	-	-	-	NH
	Unigene1252	-	-	-	-	NH
	Unigene12528	-	-	-	-	NH
	Unigene12858	-	-	-	-	NH
	Unigene13129	-	-	-	-	NH
	Unigene13292	-	-	-	-	NH
	Unigene13360	-	-	-	-	NH
	Unigene13413	-	-	-	-	NH
	Unigene13581	-	-	-	-	NH
	Unigene13626	-	-	-	-	NH
	Unigene1363	-	-	-	-	NH
	Unigene1374	-	-	-	-	NH
	Unigene13798	-	-	-	-	NH
	Unigene13845	-	-	-	-	NH
	Unigene13963	-	-	-	-	NH
	Unigene14138	-	-	-	-	NH
	Unigene14165	-	-	-	-	NH
	Unigene14197	-	-	-	-	NH
	Unigene14256	-	-	-	-	NH
	Unigene14292	-	-	-	-	NH
	Unigene14295	-	-	-	-	NH
	Unigene14420	-	-	-	-	NH
	Unigene14438	-	-	-	-	NH
	Unigene14504	-	-	-	-	NH
	Unigene1452	-	-	-	-	NH
	Unigene14530	-	-	-	-	NH
	Unigene14905	-	-	-	-	NH
	Unigene14974	-	-	-	-	NH
	Unigene1498	-	-	-	-	NH
	Unigene15023	-	-	-	-	NH
	Unigene15091	-	-	-	-	NH
	Unigene15132	-	-	-	-	NH
	Unigene15177	-	-	-	-	NH
	Unigene15273	-	-	-	-	NH
	Unigene1542	-	-	-	-	NH
	Unigene15445	-	-	-	-	NH
	Unigene15446	-	-	-	-	NH
	Unigene15558	-	-	-	-	NH
	Unigene15692	-	-	-	-	NH
	Unigene1595	-	-	-	-	NH
	Unigene15967	-	-	-	-	NH
	Unigene15982	-	-	-	-	NH
	Unigene1618	-	-	-	-	NH
	Unigene16561	-	-	-	-	NH
	Unigene16678	-	-	-	-	NH
	Unigene16746	-	-	-	-	NH
	Unigene16959	-	-	-	-	NH
	Unigene1724	-	-	-	-	NH
	Unigene17279	-	-	-	-	NH
	Unigene17555	-	-	-	-	NH
	Unigene1757	-	-	-	-	NH
	Unigene17605	-	-	-	-	NH
	Unigene1765	-	-	-	-	NH
	Unigene1772	-	-	-	-	NH
	Unigene18310	-	-	-	-	NH
	Unigene18335	-	-	-	-	NH
	Unigene18337	-	-	-	-	NH
	Unigene18409	-	-	-	-	NH
	Unigene18410	-	-	-	-	NH
	Unigene18417	-	-	-	-	NH
	Unigene18429	-	-	-	-	NH
	Unigene18452	-	-	-	-	NH
	Unigene18479	-	-	-	-	NH
	Unigene18482	-	-	-	-	NH
	Unigene18518	-	-	-	-	NH
	Unigene1853	-	-	-	-	NH
	Unigene1854	-	-	-	-	NH
	Unigene18553	-	-	-	-	NH
	Unigene18560	-	-	-	-	NH
	Unigene18587	-	-	-	-	NH
	Unigene18592	-	-	-	-	NH
	Unigene18654	-	-	-	-	NH
	Unigene1869	-	-	-	-	NH
	Unigene18774	-	-	-	-	NH
	Unigene18844	-	-	-	-	NH
	Unigene18858	-	-	-	-	NH
	Unigene18911	-	-	-	-	NH
	Unigene18990	-	-	-	-	NH
	Unigene18998	-	-	-	-	NH
	Unigene19000	-	-	-	-	NH
	Unigene19067	-	-	-	-	NH
	Unigene19132	-	-	-	-	NH
	Unigene19164	-	-	-	-	NH
	Unigene1921	-	-	-	-	NH
	Unigene19302	-	-	-	-	NH
	Unigene19389	-	-	-	-	NH
	Unigene19410	-	-	-	-	NH
	Unigene19761	-	-	-	-	NH
	Unigene19818	-	-	-	-	NH
	Unigene19864	-	-	-	-	NH
	Unigene20032	-	-	-	-	NH
	Unigene20225	-	-	-	-	NH
	Unigene20248	-	-	-	-	NH
	Unigene20315	-	-	-	-	NH
	Unigene20320	-	-	-	-	NH
	Unigene20324	-	-	-	-	NH
	Unigene2046	-	-	-	-	NH
	Unigene20460	-	-	-	-	NH
	Unigene20509	-	-	-	-	NH
	Unigene20546	-	-	-	-	NH
	Unigene20564	-	-	-	-	NH
	Unigene20565	-	-	-	-	NH
	Unigene20583	-	-	-	-	NH
	Unigene20781	-	-	-	-	NH
	Unigene20825	-	-	-	-	NH
	Unigene2083	-	-	-	-	NH
	Unigene20845	-	-	-	-	NH
	Unigene2116	-	-	-	-	NH
	Unigene2121	-	-	-	-	NH
	Unigene21245	-	-	-	-	NH
	Unigene21397	-	-	-	-	NH
	Unigene21482	-	-	-	-	NH
	Unigene21497	-	-	-	-	NH
	Unigene21544	-	-	-	-	NH
	Unigene2157	-	-	-	-	NH
	Unigene2159	-	-	-	-	NH
	Unigene21593	-	-	-	-	NH
	Unigene21686	-	-	-	-	NH
	Unigene21881	-	-	-	-	NH
	Unigene2205	-	-	-	-	NH
	Unigene22076	-	-	-	-	NH
	Unigene22084	-	-	-	-	NH
	Unigene22111	-	-	-	-	NH
	Unigene22166	-	-	-	-	NH
	Unigene22217	-	-	-	-	NH
	Unigene22278	-	-	-	-	NH
	Unigene2237	-	-	-	-	NH
	Unigene22433	-	-	-	-	NH
	Unigene22441	-	-	-	-	NH
	Unigene22494	-	-	-	-	NH
	Unigene2251	-	-	-	-	NH
	Unigene22544	-	-	-	-	NH
	Unigene22549	-	-	-	-	NH
	Unigene22648	-	-	-	-	NH
	Unigene22656	-	-	-	-	NH
	Unigene22704	-	-	-	-	NH
	Unigene22819	-	-	-	-	NH
	Unigene22843	-	-	-	-	NH
	Unigene22986	-	-	-	-	NH
	Unigene23058	-	-	-	-	NH
	Unigene23211	-	-	-	-	NH
	Unigene23334	-	-	-	-	NH
	Unigene23355	-	-	-	-	NH
	Unigene23379	-	-	-	-	NH
	Unigene2340	-	-	-	-	NH
	Unigene23416	-	-	-	-	NH
	Unigene23421	-	-	-	-	NH
	Unigene23472	-	-	-	-	NH
	Unigene23484	-	-	-	-	NH
	Unigene23537	-	-	-	-	NH
	Unigene23548	-	-	-	-	NH
	Unigene23589	-	-	-	-	NH
	Unigene23594	-	-	-	-	NH
	Unigene23893	-	-	-	-	NH
	Unigene23966	-	-	-	-	NH
	Unigene24102	-	-	-	-	NH
	Unigene24142	-	-	-	-	NH
	Unigene24194	-	-	-	-	NH
	Unigene24197	-	-	-	-	NH
	Unigene24210	-	-	-	-	NH
	Unigene24239	-	-	-	-	NH
	Unigene24245	-	-	-	-	NH
	Unigene24325	-	-	-	-	NH
	Unigene24326	-	-	-	-	NH
	Unigene2433	-	-	-	-	NH
	Unigene24423	-	-	-	-	NH
	Unigene24462	-	-	-	-	NH
	Unigene24479	-	-	-	-	NH
	Unigene2450	-	-	-	-	NH
	Unigene24533	-	-	-	-	NH
	Unigene24568	-	-	-	-	NH
	Unigene24581	-	-	-	-	NH
	Unigene24583	-	-	-	-	NH
	Unigene24601	-	-	-	-	NH
	Unigene24602	-	-	-	-	NH
	Unigene24763	-	-	-	-	NH
	Unigene24854	-	-	-	-	NH
	Unigene24868	-	-	-	-	NH
	Unigene24932	-	-	-	-	NH
	Unigene24967	-	-	-	-	NH
	Unigene25010	-	-	-	-	NH
	Unigene25085	-	-	-	-	NH
	Unigene25319	-	-	-	-	NH
	Unigene25361	-	-	-	-	NH
	Unigene25437	-	-	-	-	NH
	Unigene25457	-	-	-	-	NH
	Unigene25493	-	-	-	-	NH
	Unigene25636	-	-	-	-	NH
	Unigene25703	-	-	-	-	NH
	Unigene25780	-	-	-	-	NH
	Unigene25793	-	-	-	-	NH
	Unigene25857	-	-	-	-	NH
	Unigene25881	-	-	-	-	NH
	Unigene25996	-	-	-	-	NH
	Unigene26000	-	-	-	-	NH
	Unigene26054	-	-	-	-	NH
	Unigene2606	-	-	-	-	NH
	Unigene26093	-	-	-	-	NH
	Unigene26111	-	-	-	-	NH
	Unigene26113	-	-	-	-	NH
	Unigene2615	-	-	-	-	NH
	Unigene2622	-	-	-	-	NH
	Unigene26221	-	-	-	-	NH
	Unigene26296	-	-	-	-	NH
	Unigene2634	-	-	-	-	NH
	Unigene26341	-	-	-	-	NH
	Unigene26365	-	-	-	-	NH
	Unigene26446	-	-	-	-	NH
	Unigene26488	-	-	-	-	NH
	Unigene26545	-	-	-	-	NH
	Unigene26602	-	-	-	-	NH
	Unigene26626	-	-	-	-	NH
	Unigene26631	-	-	-	-	NH
	Unigene26687	-	-	-	-	NH
	Unigene2671	-	-	-	-	NH
	Unigene26714	-	-	-	-	NH
	Unigene26752	-	-	-	-	NH
	Unigene2681	-	-	-	-	NH
	Unigene26956	-	-	-	-	NH
	Unigene27005	-	-	-	-	NH
	Unigene27074	-	-	-	-	NH
	Unigene2710	-	-	-	-	NH
	Unigene27173	-	-	-	-	NH
	Unigene27343	-	-	-	-	NH
	Unigene27401	-	-	-	-	NH
	Unigene27533	-	-	-	-	NH
	Unigene27543	-	-	-	-	NH
	Unigene27547	-	-	-	-	NH
	Unigene27600	-	-	-	-	NH
	Unigene27604	-	-	-	-	NH
	Unigene27628	-	-	-	-	NH
	Unigene27648	-	-	-	-	NH
	Unigene27733	-	-	-	-	NH
	Unigene27807	-	-	-	-	NH
	Unigene27811	-	-	-	-	NH
	Unigene27831	-	-	-	-	NH
	Unigene27879	-	-	-	-	NH
	Unigene27905	-	-	-	-	NH
	Unigene28049	-	-	-	-	NH
	Unigene28088	-	-	-	-	NH
	Unigene28158	-	-	-	-	NH
	Unigene2820	-	-	-	-	NH
	Unigene28231	-	-	-	-	NH
	Unigene28234	-	-	-	-	NH
	Unigene28263	-	-	-	-	NH
	Unigene28290	-	-	-	-	NH
	Unigene2840	-	-	-	-	NH
	Unigene28422	-	-	-	-	NH
	Unigene28470	-	-	-	-	NH
	Unigene28521	-	-	-	-	NH
	Unigene2854	-	-	-	-	NH
	Unigene2861	-	-	-	-	NH
	Unigene28611	-	-	-	-	NH
	Unigene28713	-	-	-	-	NH
	Unigene28722	-	-	-	-	NH
	Unigene28738	-	-	-	-	NH
	Unigene28747	-	-	-	-	NH
	Unigene28759	-	-	-	-	NH
	Unigene28764	-	-	-	-	NH
	Unigene28801	-	-	-	-	NH
	Unigene28823	-	-	-	-	NH
	Unigene28868	-	-	-	-	NH
	Unigene28873	-	-	-	-	NH
	Unigene28886	-	-	-	-	NH
	Unigene28928	-	-	-	-	NH
	Unigene28936	-	-	-	-	NH
	Unigene28955	-	-	-	-	NH
	Unigene29002	-	-	-	-	NH
	Unigene29039	-	-	-	-	NH
	Unigene29118	-	-	-	-	NH
	Unigene2913	-	-	-	-	NH
	Unigene29184	-	-	-	-	NH
	Unigene29213	-	-	-	-	NH
	Unigene29310	-	-	-	-	NH
	Unigene29353	-	-	-	-	NH
	Unigene29380	-	-	-	-	NH
	Unigene2943	-	-	-	-	NH
	Unigene29507	-	-	-	-	NH
	Unigene29526	-	-	-	-	NH
	Unigene29539	-	-	-	-	NH
	Unigene29552	-	-	-	-	NH
	Unigene29603	-	-	-	-	NH
	Unigene29633	-	-	-	-	NH
	Unigene29770	-	-	-	-	NH
	Unigene29863	-	-	-	-	NH
	Unigene29920	-	-	-	-	NH
	Unigene29962	-	-	-	-	NH
	Unigene30036	-	-	-	-	NH
	Unigene30048	-	-	-	-	NH
	Unigene30075	-	-	-	-	NH
	Unigene30079	-	-	-	-	NH
	Unigene30085	-	-	-	-	NH
	Unigene3009	-	-	-	-	NH
	Unigene30097	-	-	-	-	NH
	Unigene30173	-	-	-	-	NH
	Unigene30184	-	-	-	-	NH
	Unigene30241	-	-	-	-	NH
	Unigene30250	-	-	-	-	NH
	Unigene30322	-	-	-	-	NH
	Unigene30381	-	-	-	-	NH
	Unigene30400	-	-	-	-	NH
	Unigene30419	-	-	-	-	NH
	Unigene30518	-	-	-	-	NH
	Unigene30524	-	-	-	-	NH
	Unigene30604	-	-	-	-	NH
	Unigene30614	-	-	-	-	NH
	Unigene30659	-	-	-	-	NH
	Unigene30780	-	-	-	-	NH
	Unigene30792	-	-	-	-	NH
	Unigene30832	-	-	-	-	NH
	Unigene30833	-	-	-	-	NH
	Unigene30884	-	-	-	-	NH
	Unigene30901	-	-	-	-	NH
	Unigene30928	-	-	-	-	NH
	Unigene30953	-	-	-	-	NH
	Unigene31020	-	-	-	-	NH
	Unigene31029	-	-	-	-	NH
	Unigene31133	-	-	-	-	NH
	Unigene31167	-	-	-	-	NH
	Unigene31175	-	-	-	-	NH
	Unigene31178	-	-	-	-	NH
	Unigene31340	-	-	-	-	NH
	Unigene31369	-	-	-	-	NH
	Unigene31376	-	-	-	-	NH
	Unigene31404	-	-	-	-	NH
	Unigene31433	-	-	-	-	NH
	Unigene31434	-	-	-	-	NH
	Unigene31592	-	-	-	-	NH
	Unigene31600	-	-	-	-	NH
	Unigene31631	-	-	-	-	NH
	Unigene31658	-	-	-	-	NH
	Unigene31659	-	-	-	-	NH
	Unigene31709	-	-	-	-	NH
	Unigene31773	-	-	-	-	NH
	Unigene31799	-	-	-	-	NH
	Unigene31823	-	-	-	-	NH
	Unigene31836	-	-	-	-	NH
	Unigene31855	-	-	-	-	NH
	Unigene31901	-	-	-	-	NH
	Unigene31953	-	-	-	-	NH
	Unigene31978	-	-	-	-	NH
	Unigene31996	-	-	-	-	NH
	Unigene32039	-	-	-	-	NH
	Unigene32172	-	-	-	-	NH
	Unigene32181	-	-	-	-	NH
	Unigene32194	-	-	-	-	NH
	Unigene32207	-	-	-	-	NH
	Unigene3222	-	-	-	-	NH
	Unigene32234	-	-	-	-	NH
	Unigene32243	-	-	-	-	NH
	Unigene32244	-	-	-	-	NH
	Unigene3226	-	-	-	-	NH
	Unigene32378	-	-	-	-	NH
	Unigene32391	-	-	-	-	NH
	Unigene32461	-	-	-	-	NH
	Unigene32556	-	-	-	-	NH
	Unigene32615	-	-	-	-	NH
	Unigene32628	-	-	-	-	NH
	Unigene32635	-	-	-	-	NH
	Unigene32844	-	-	-	-	NH
	Unigene32867	-	-	-	-	NH
	Unigene32961	-	-	-	-	NH
	Unigene33126	-	-	-	-	NH
	Unigene33136	-	-	-	-	NH
	Unigene33266	-	-	-	-	NH
	Unigene33359	-	-	-	-	NH
	Unigene33547	-	-	-	-	NH
	Unigene33691	-	-	-	-	NH
	Unigene33717	-	-	-	-	NH
	Unigene33764	-	-	-	-	NH
	Unigene33777	-	-	-	-	NH
	Unigene33829	-	-	-	-	NH
	Unigene33836	-	-	-	-	NH
	Unigene33975	-	-	-	-	NH
	Unigene33979	-	-	-	-	NH
	Unigene34088	-	-	-	-	NH
	Unigene34219	-	-	-	-	NH
	Unigene34251	-	-	-	-	NH
	Unigene34345	-	-	-	-	NH
	Unigene34356	-	-	-	-	NH
	Unigene34383	-	-	-	-	NH
	Unigene34406	-	-	-	-	NH
	Unigene34464	-	-	-	-	NH
	Unigene34516	-	-	-	-	NH
	Unigene34532	-	-	-	-	NH
	Unigene34541	-	-	-	-	NH
	Unigene34599	-	-	-	-	NH
	Unigene3464	-	-	-	-	NH
	Unigene34660	-	-	-	-	NH
	Unigene34771	-	-	-	-	NH
	Unigene34895	-	-	-	-	NH
	Unigene34905	-	-	-	-	NH
	Unigene35215	-	-	-	-	NH
	Unigene35287	-	-	-	-	NH
	Unigene35359	-	-	-	-	NH
	Unigene35394	-	-	-	-	NH
	Unigene35635	-	-	-	-	NH
	Unigene35714	-	-	-	-	NH
	Unigene35792	-	-	-	-	NH
	Unigene35808	-	-	-	-	NH
	Unigene3581	-	-	-	-	NH
	Unigene35878	-	-	-	-	NH
	Unigene3595	-	-	-	-	NH
	Unigene35998	-	-	-	-	NH
	Unigene36176	-	-	-	-	NH
	Unigene3619	-	-	-	-	NH
	Unigene36191	-	-	-	-	NH
	Unigene36246	-	-	-	-	NH
	Unigene36371	-	-	-	-	NH
	Unigene36372	-	-	-	-	NH
	Unigene36478	-	-	-	-	NH
	Unigene36483	-	-	-	-	NH
	Unigene36563	-	-	-	-	NH
	Unigene36637	-	-	-	-	NH
	Unigene36641	-	-	-	-	NH
	Unigene36988	-	-	-	-	NH
	Unigene3699	-	-	-	-	NH
	Unigene37003	-	-	-	-	NH
	Unigene37057	-	-	-	-	NH
	Unigene37166	-	-	-	-	NH
	Unigene37311	-	-	-	-	NH
	Unigene37363	-	-	-	-	NH
	Unigene37411	-	-	-	-	NH
	Unigene37458	-	-	-	-	NH
	Unigene3746	-	-	-	-	NH
	Unigene37462	-	-	-	-	NH
	Unigene3748	-	-	-	-	NH
	Unigene37550	-	-	-	-	NH
	Unigene37576	-	-	-	-	NH
	Unigene37614	-	-	-	-	NH
	Unigene37716	-	-	-	-	NH
	Unigene37792	-	-	-	-	NH
	Unigene37832	-	-	-	-	NH
	Unigene37852	-	-	-	-	NH
	Unigene37980	-	-	-	-	NH
	Unigene38202	-	-	-	-	NH
	Unigene3829	-	-	-	-	NH
	Unigene3845	-	-	-	-	NH
	Unigene38455	-	-	-	-	NH
	Unigene38549	-	-	-	-	NH
	Unigene38641	-	-	-	-	NH
	Unigene38650	-	-	-	-	NH
	Unigene3884	-	-	-	-	NH
	Unigene38868	-	-	-	-	NH
	Unigene38917	-	-	-	-	NH
	Unigene38940	-	-	-	-	NH
	Unigene39042	-	-	-	-	NH
	Unigene39087	-	-	-	-	NH
	Unigene39129	-	-	-	-	NH
	Unigene39189	-	-	-	-	NH
	Unigene39190	-	-	-	-	NH
	Unigene39208	-	-	-	-	NH
	Unigene39289	-	-	-	-	NH
	Unigene39372	-	-	-	-	NH
	Unigene39376	-	-	-	-	NH
	Unigene39447	-	-	-	-	NH
	Unigene3947	-	-	-	-	NH
	Unigene39487	-	-	-	-	NH
	Unigene39492	-	-	-	-	NH
	Unigene39493	-	-	-	-	NH
	Unigene39506	-	-	-	-	NH
	Unigene39554	-	-	-	-	NH
	Unigene39569	-	-	-	-	NH
	Unigene39755	-	-	-	-	NH
	Unigene39762	-	-	-	-	NH
	Unigene39837	-	-	-	-	NH
	Unigene39845	-	-	-	-	NH
	Unigene39914	-	-	-	-	NH
	Unigene39980	-	-	-	-	NH
	Unigene40002	-	-	-	-	NH
	Unigene40008	-	-	-	-	NH
	Unigene40057	-	-	-	-	NH
	Unigene4010	-	-	-	-	NH
	Unigene40134	-	-	-	-	NH
	Unigene40140	-	-	-	-	NH
	Unigene4018	-	-	-	-	NH
	Unigene40215	-	-	-	-	NH
	Unigene40251	-	-	-	-	NH
	Unigene40315	-	-	-	-	NH
	Unigene40407	-	-	-	-	NH
	Unigene40460	-	-	-	-	NH
	Unigene40519	-	-	-	-	NH
	Unigene40542	-	-	-	-	NH
	Unigene40609	-	-	-	-	NH
	Unigene4061	-	-	-	-	NH
	Unigene40612	-	-	-	-	NH
	Unigene40710	-	-	-	-	NH
	Unigene40812	-	-	-	-	NH
	Unigene40838	-	-	-	-	NH
	Unigene40854	-	-	-	-	NH
	Unigene40890	-	-	-	-	NH
	Unigene40932	-	-	-	-	NH
	Unigene40935	-	-	-	-	NH
	Unigene40968	-	-	-	-	NH
	Unigene41136	-	-	-	-	NH
	Unigene41193	-	-	-	-	NH
	Unigene41206	-	-	-	-	NH
	Unigene41225	-	-	-	-	NH
	Unigene41232	-	-	-	-	NH
	Unigene41267	-	-	-	-	NH
	Unigene41544	-	-	-	-	NH
	Unigene41601	-	-	-	-	NH
	Unigene41640	-	-	-	-	NH
	Unigene41645	-	-	-	-	NH
	Unigene41717	-	-	-	-	NH
	Unigene41722	-	-	-	-	NH
	Unigene4176	-	-	-	-	NH
	Unigene4177	-	-	-	-	NH
	Unigene41780	-	-	-	-	NH
	Unigene41800	-	-	-	-	NH
	Unigene41862	-	-	-	-	NH
	Unigene42010	-	-	-	-	NH
	Unigene4202	-	-	-	-	NH
	Unigene42053	-	-	-	-	NH
	Unigene4206	-	-	-	-	NH
	Unigene42104	-	-	-	-	NH
	Unigene42148	-	-	-	-	NH
	Unigene42164	-	-	-	-	NH
	Unigene42165	-	-	-	-	NH
	Unigene42225	-	-	-	-	NH
	Unigene42265	-	-	-	-	NH
	Unigene42430	-	-	-	-	NH
	Unigene42452	-	-	-	-	NH
	Unigene42454	-	-	-	-	NH
	Unigene42490	-	-	-	-	NH
	Unigene42523	-	-	-	-	NH
	Unigene42590	-	-	-	-	NH
	Unigene42725	-	-	-	-	NH
	Unigene4278	-	-	-	-	NH
	Unigene42786	-	-	-	-	NH
	Unigene42814	-	-	-	-	NH
	Unigene42816	-	-	-	-	NH
	Unigene43017	-	-	-	-	NH
	Unigene43109	-	-	-	-	NH
	Unigene43129	-	-	-	-	NH
	Unigene43135	-	-	-	-	NH
	Unigene43152	-	-	-	-	NH
	Unigene43324	-	-	-	-	NH
	Unigene43341	-	-	-	-	NH
	Unigene43393	-	-	-	-	NH
	Unigene43623	-	-	-	-	NH
	Unigene43642	-	-	-	-	NH
	Unigene43762	-	-	-	-	NH
	Unigene43850	-	-	-	-	NH
	Unigene43989	-	-	-	-	NH
	Unigene44068	-	-	-	-	NH
	Unigene44084	-	-	-	-	NH
	Unigene44098	-	-	-	-	NH
	Unigene44150	-	-	-	-	NH
	Unigene4428	-	-	-	-	NH
	Unigene44322	-	-	-	-	NH
	Unigene44545	-	-	-	-	NH
	Unigene44561	-	-	-	-	NH
	Unigene4464	-	-	-	-	NH
	Unigene44698	-	-	-	-	NH
	Unigene44954	-	-	-	-	NH
	Unigene44961	-	-	-	-	NH
	Unigene4497	-	-	-	-	NH
	Unigene45106	-	-	-	-	NH
	Unigene45141	-	-	-	-	NH
	Unigene4525	-	-	-	-	NH
	Unigene45270	-	-	-	-	NH
	Unigene45295	-	-	-	-	NH
	Unigene45426	-	-	-	-	NH
	Unigene45440	-	-	-	-	NH
	Unigene45469	-	-	-	-	NH
	Unigene45631	-	-	-	-	NH
	Unigene45968	-	-	-	-	NH
	Unigene4597	-	-	-	-	NH
	Unigene46064	-	-	-	-	NH
	Unigene46080	-	-	-	-	NH
	Unigene46210	-	-	-	-	NH
	Unigene4642	-	-	-	-	NH
	Unigene4654	-	-	-	-	NH
	Unigene46617	-	-	-	-	NH
	Unigene46645	-	-	-	-	NH
	Unigene46791	-	-	-	-	NH
	Unigene46892	-	-	-	-	NH
	Unigene46925	-	-	-	-	NH
	Unigene46926	-	-	-	-	NH
	Unigene47011	-	-	-	-	NH
	Unigene47016	-	-	-	-	NH
	Unigene47084	-	-	-	-	NH
	Unigene4723	-	-	-	-	NH
	Unigene47358	-	-	-	-	NH
	Unigene47388	-	-	-	-	NH
	Unigene47393	-	-	-	-	NH
	Unigene4748	-	-	-	-	NH
	Unigene47481	-	-	-	-	NH
	Unigene47490	-	-	-	-	NH
	Unigene47543	-	-	-	-	NH
	Unigene47604	-	-	-	-	NH
	Unigene47667	-	-	-	-	NH
	Unigene47750	-	-	-	-	NH
	Unigene47764	-	-	-	-	NH
	Unigene48035	-	-	-	-	NH
	Unigene48050	-	-	-	-	NH
	Unigene4833	-	-	-	-	NH
	Unigene48360	-	-	-	-	NH
	Unigene48433	-	-	-	-	NH
	Unigene4847	-	-	-	-	NH
	Unigene48504	-	-	-	-	NH
	Unigene48565	-	-	-	-	NH
	Unigene48715	-	-	-	-	NH
	Unigene48757	-	-	-	-	NH
	Unigene48935	-	-	-	-	NH
	Unigene49055	-	-	-	-	NH
	Unigene49093	-	-	-	-	NH
	Unigene49120	-	-	-	-	NH
	Unigene49211	-	-	-	-	NH
	Unigene49296	-	-	-	-	NH
	Unigene49412	-	-	-	-	NH
	Unigene49418	-	-	-	-	NH
	Unigene49469	-	-	-	-	NH
	Unigene49519	-	-	-	-	NH
	Unigene49611	-	-	-	-	NH
	Unigene4970	-	-	-	-	NH
	Unigene4976	-	-	-	-	NH
	Unigene5005	-	-	-	-	NH
	Unigene50412	-	-	-	-	NH
	Unigene5043	-	-	-	-	NH
	Unigene50433	-	-	-	-	NH
	Unigene50447	-	-	-	-	NH
	Unigene50559	-	-	-	-	NH
	Unigene50595	-	-	-	-	NH
	Unigene50635	-	-	-	-	NH
	Unigene50676	-	-	-	-	NH
	Unigene50886	-	-	-	-	NH
	Unigene51074	-	-	-	-	NH
	Unigene51415	-	-	-	-	NH
	Unigene51594	-	-	-	-	NH
	Unigene51794	-	-	-	-	NH
	Unigene51807	-	-	-	-	NH
	Unigene5184	-	-	-	-	NH
	Unigene51915	-	-	-	-	NH
	Unigene51952	-	-	-	-	NH
	Unigene52204	-	-	-	-	NH
	Unigene52229	-	-	-	-	NH
	Unigene52635	-	-	-	-	NH
	Unigene52669	-	-	-	-	NH
	Unigene52739	-	-	-	-	NH
	Unigene52865	-	-	-	-	NH
	Unigene52867	-	-	-	-	NH
	Unigene52940	-	-	-	-	NH
	Unigene52941	-	-	-	-	NH
	Unigene52978	-	-	-	-	NH
	Unigene53608	-	-	-	-	NH
	Unigene53612	-	-	-	-	NH
	Unigene53672	-	-	-	-	NH
	Unigene53747	-	-	-	-	NH
	Unigene54013	-	-	-	-	NH
	Unigene5406	-	-	-	-	NH
	Unigene54185	-	-	-	-	NH
	Unigene54319	-	-	-	-	NH
	Unigene54336	-	-	-	-	NH
	Unigene54710	-	-	-	-	NH
	Unigene54868	-	-	-	-	NH
	Unigene5501	-	-	-	-	NH
	Unigene5530	-	-	-	-	NH
	Unigene55312	-	-	-	-	NH
	Unigene55336	-	-	-	-	NH
	Unigene55346	-	-	-	-	NH
	Unigene5577	-	-	-	-	NH
	Unigene5580	-	-	-	-	NH
	Unigene55838	-	-	-	-	NH
	Unigene56213	-	-	-	-	NH
	Unigene56220	-	-	-	-	NH
	Unigene56259	-	-	-	-	NH
	Unigene56307	-	-	-	-	NH
	Unigene5643	-	-	-	-	NH
	Unigene566	-	-	-	-	NH
	Unigene56872	-	-	-	-	NH
	Unigene56954	-	-	-	-	NH
	Unigene57002	-	-	-	-	NH
	Unigene57014	-	-	-	-	NH
	Unigene57032	-	-	-	-	NH
	Unigene57052	-	-	-	-	NH
	Unigene5736	-	-	-	-	NH
	Unigene57387	-	-	-	-	NH
	Unigene57449	-	-	-	-	NH
	Unigene5747	-	-	-	-	NH
	Unigene57567	-	-	-	-	NH
	Unigene58097	-	-	-	-	NH
	Unigene5824	-	-	-	-	NH
	Unigene5835	-	-	-	-	NH
	Unigene58600	-	-	-	-	NH
	Unigene5865	-	-	-	-	NH
	Unigene58671	-	-	-	-	NH
	Unigene58819	-	-	-	-	NH
	Unigene58833	-	-	-	-	NH
	Unigene58845	-	-	-	-	NH
	Unigene58873	-	-	-	-	NH
	Unigene5889	-	-	-	-	NH
	Unigene58989	-	-	-	-	NH
	Unigene59026	-	-	-	-	NH
	Unigene59130	-	-	-	-	NH
	Unigene59286	-	-	-	-	NH
	Unigene59414	-	-	-	-	NH
	Unigene59446	-	-	-	-	NH
	Unigene59549	-	-	-	-	NH
	Unigene59609	-	-	-	-	NH
	Unigene59673	-	-	-	-	NH
	Unigene59732	-	-	-	-	NH
	Unigene59740	-	-	-	-	NH
	Unigene5976	-	-	-	-	NH
	Unigene59815	-	-	-	-	NH
	Unigene6023	-	-	-	-	NH
	Unigene60269	-	-	-	-	NH
	Unigene60324	-	-	-	-	NH
	Unigene60352	-	-	-	-	NH
	Unigene60369	-	-	-	-	NH
	Unigene60400	-	-	-	-	NH
	Unigene6047	-	-	-	-	NH
	Unigene60530	-	-	-	-	NH
	Unigene60539	-	-	-	-	NH
	Unigene60541	-	-	-	-	NH
	Unigene60744	-	-	-	-	NH
	Unigene6108	-	-	-	-	NH
	Unigene6122	-	-	-	-	NH
	Unigene61575	-	-	-	-	NH
	Unigene61617	-	-	-	-	NH
	Unigene61779	-	-	-	-	NH
	Unigene61827	-	-	-	-	NH
	Unigene6198	-	-	-	-	NH
	Unigene62115	-	-	-	-	NH
	Unigene62208	-	-	-	-	NH
	Unigene6283	-	-	-	-	NH
	Unigene62888	-	-	-	-	NH
	Unigene62943	-	-	-	-	NH
	Unigene62944	-	-	-	-	NH
	Unigene62970	-	-	-	-	NH
	Unigene62995	-	-	-	-	NH
	Unigene630	-	-	-	-	NH
	Unigene63451	-	-	-	-	NH
	Unigene63636	-	-	-	-	NH
	Unigene63937	-	-	-	-	NH
	Unigene6399	-	-	-	-	NH
	Unigene64226	-	-	-	-	NH
	Unigene64290	-	-	-	-	NH
	Unigene6498	-	-	-	-	NH
	Unigene65171	-	-	-	-	NH
	Unigene66075	-	-	-	-	NH
	Unigene6624	-	-	-	-	NH
	Unigene66371	-	-	-	-	NH
	Unigene66468	-	-	-	-	NH
	Unigene66485	-	-	-	-	NH
	Unigene66504	-	-	-	-	NH
	Unigene66528	-	-	-	-	NH
	Unigene6683	-	-	-	-	NH
	Unigene66921	-	-	-	-	NH
	Unigene68223	-	-	-	-	NH
	Unigene6868	-	-	-	-	NH
	Unigene687	-	-	-	-	NH
	Unigene69307	-	-	-	-	NH
	Unigene6962	-	-	-	-	NH
	Unigene7016	-	-	-	-	NH
	Unigene7025	-	-	-	-	NH
	Unigene7069	-	-	-	-	NH
	Unigene71034	-	-	-	-	NH
	Unigene7106	-	-	-	-	NH
	Unigene7123	-	-	-	-	NH
	Unigene7192	-	-	-	-	NH
	Unigene7194	-	-	-	-	NH
	Unigene7207	-	-	-	-	NH
	Unigene7246	-	-	-	-	NH
	Unigene7459	-	-	-	-	NH
	Unigene7569	-	-	-	-	NH
	Unigene7612	-	-	-	-	NH
	Unigene7636	-	-	-	-	NH
	Unigene7639	-	-	-	-	NH
	Unigene765	-	-	-	-	NH
	Unigene7706	-	-	-	-	NH
	Unigene7755	-	-	-	-	NH
	Unigene7788	-	-	-	-	NH
	Unigene789	-	-	-	-	NH
	Unigene792	-	-	-	-	NH
	Unigene7943	-	-	-	-	NH
	Unigene8016	-	-	-	-	NH
	Unigene8035	-	-	-	-	NH
	Unigene8097	-	-	-	-	NH
	Unigene8102	-	-	-	-	NH
	Unigene8130	-	-	-	-	NH
	Unigene8140	-	-	-	-	NH
	Unigene815	-	-	-	-	NH
	Unigene827	-	-	-	-	NH
	Unigene8302	-	-	-	-	NH
	Unigene8305	-	-	-	-	NH
	Unigene8359	-	-	-	-	NH
	Unigene8546	-	-	-	-	NH
	Unigene8640	-	-	-	-	NH
	Unigene8672	-	-	-	-	NH
	Unigene8727	-	-	-	-	NH
	Unigene8785	-	-	-	-	NH
	Unigene8967	-	-	-	-	NH
	Unigene8983	-	-	-	-	NH
	Unigene9151	-	-	-	-	NH
	Unigene9189	-	-	-	-	NH
	Unigene9288	-	-	-	-	NH
	Unigene9303	-	-	-	-	NH
	Unigene9424	-	-	-	-	NH
	Unigene9537	-	-	-	-	NH
	Unigene9541	-	-	-	-	NH
	Unigene9650	-	-	-	-	NH
	Unigene967	-	-	-	-	NH
	Unigene9698	-	-	-	-	NH
	Unigene9856	-	-	-	-	NH
	Unigene9893	-	-	-	-	NH
	Unigene9948	-	-	-	-	NH
	Unigene9981	-	-	-	-	NH
